# Supplementary material for: Levan Enhances Associated Growth of Bacteroides, Escherichia, Streptococcus and Faecalibacterium in Fecal Microbiota
Source: PLoS One. 2015 Dec 2;10(12):e0144042. doi: 10.1371/journal.pone.0144042 (PMC4667893; doi:10.1371/journal.pone.0144042)
Supplement: S1 Table — All samples were normalized to total OTUs of 5971. (XLSX) [file pone.0144042.s001.xlsx]

## Sheet: Sheet1
	ENA code	ERS953755	ERS953756	ERS953757	ERS953758	ERS953759	ERS953760	ERS953761	ERS953762	ERS953763	ERS953764	ERS953765
Group	Taxonomy	FS1	FS2	FS3	FS4	FS5	FS6	FS7	FS8	FS9	FS10	FS11
Otu000001	Bacteria(100);Proteobacteria(100);Gammaproteobacteria(100);Enterobacteriales(100);Enterobacteriaceae(100);Escherichia-Shigella(100);	4	0	15	1	6	1	2	0	3	3	6
Otu000002	Bacteria(100);Bacteroidetes(100);Bacteroidia(100);Bacteroidales(100);Bacteroidaceae(100);Bacteroides(100);	6	3	1	2	6	3	12	8	4	4	5
Otu000003	Bacteria(100);Firmicutes(100);Clostridia(100);Clostridiales(100);Ruminococcaceae(100);Faecalibacterium(100);	795	16	26	666	44	428	343	314	265	155	189
Otu000004	Bacteria(100);Firmicutes(100);Negativicutes(100);Selenomonadales(100);Veillonellaceae(100);Dialister(100);	0	5	1769	765	0	0	925	2	946	0	1
Otu000005	Bacteria(100);Actinobacteria(100);Actinobacteria(100);Bifidobacteriales(100);Bifidobacteriaceae(100);Bifidobacterium(100);	14	379	203	227	258	85	161	118	74	67	199
Otu000006	Bacteria(100);Bacteroidetes(100);Bacteroidia(100);Bacteroidales(100);Bacteroidaceae(100);Bacteroides(100);	0	17	6	202	90	15	6	33	15	19	19
Otu000007	Bacteria(100);Firmicutes(100);Clostridia(100);Clostridiales(100);Ruminococcaceae(100);Ruminococcus(100);	18	90	20	46	385	57	250	113	106	378	329
Otu000008	Bacteria(100);Firmicutes(100);Clostridia(100);Clostridiales(100);Lachnospiraceae(100);Pseudobutyrivibrio(88);	13	140	15	97	219	376	32	408	260	629	591
Otu000009	Bacteria(100);Actinobacteria(100);Coriobacteriia(100);Coriobacteriales(100);Coriobacteriaceae(100);Collinsella(100);	1	8	3	44	49	15	38	10	19	2	24
Otu000010	Bacteria(100);Firmicutes(100);Clostridia(100);Clostridiales(100);Peptostreptococcaceae(100);Incertae_Sedis(100);	13	447	12	41	73	38	15	37	18	26	84
Otu000011	Bacteria(100);Bacteroidetes(100);Bacteroidia(100);Bacteroidales(100);Prevotellaceae(100);Prevotella(100);	593	1	19	0	0	21	30	68	124	7	11
Otu000012	Bacteria(100);Firmicutes(100);Clostridia(100);Clostridiales(100);Ruminococcaceae(100);unclassified(95);	124	72	63	0	25	161	114	141	80	148	169
Otu000013	Bacteria(100);Firmicutes(100);Clostridia(100);Clostridiales(100);Ruminococcaceae(100);Subdoligranulum(100);	33	327	100	8	507	37	192	58	133	124	116
Otu000014	Bacteria(100);Bacteroidetes(100);Bacteroidia(100);Bacteroidales(100);Bacteroidaceae(100);Bacteroides(100);	0	0	0	4	16	2	8	2	6	2	1
Otu000015	Bacteria(100);Firmicutes(83);Clostridia(83);Clostridiales(83);Christensenellaceae(68);unclassified(68);	1	8	0	0	1	412	11	377	6	357	149
Otu000016	Bacteria(100);Bacteroidetes(100);Bacteroidia(100);Bacteroidales(100);Bacteroidaceae(100);Bacteroides(100);	31	5	9	97	71	27	43	44	89	8	8
Otu000017	Bacteria(100);Firmicutes(64);Clostridia(58);Clostridiales(58);unclassified(58);unclassified(58);	0	45	430	0	0	81	0	82	0	305	196
Otu000018	Bacteria(100);Firmicutes(98);Clostridia(97);Clostridiales(97);unclassified(94);unclassified(94);	67	119	0	0	105	260	0	250	0	482	304
Otu000019	Bacteria(100);Firmicutes(100);Clostridia(100);Clostridiales(100);Ruminococcaceae(100);Subdoligranulum(100);	11	41	142	126	124	30	56	101	130	93	115
Otu000020	Bacteria(100);Firmicutes(100);Erysipelotrichia(100);Erysipelotrichales(100);Erysipelotrichaceae(100);unclassified(100);	2	31	0	3	382	27	18	53	16	41	48
Otu000021	Bacteria(100);Verrucomicrobia(100);Verrucomicrobiae(100);Verrucomicrobiales(100);Verrucomicrobiaceae(100);Akkermansia(100);	42	552	0	0	4	121	0	156	0	68	96
Otu000022	Bacteria(100);Firmicutes(100);Bacilli(100);Lactobacillales(100);Streptococcaceae(100);Streptococcus(100);	0	0	0	0	0	0	12	1	0	0	0
Otu000023	Bacteria(100);Firmicutes(100);Clostridia(99);Clostridiales(99);Ruminococcaceae(97);unclassified(97);	298	121	314	0	0	43	105	38	48	93	90
Otu000024	Bacteria(100);Firmicutes(100);Clostridia(100);Clostridiales(100);Lachnospiraceae(100);Coprococcus(99);	22	94	34	204	81	338	64	238	92	193	286
Otu000025	Bacteria(100);Firmicutes(100);Clostridia(100);Clostridiales(100);Lachnospiraceae(100);Blautia(99);	20	46	48	248	285	24	63	64	30	73	87
Otu000026	Bacteria(100);Firmicutes(95);Clostridia(92);Clostridiales(90);Ruminococcaceae(56);unclassified(56);	12	514	207	18	1	22	0	22	0	21	4
Otu000027	Bacteria(100);Firmicutes(100);Erysipelotrichia(100);Erysipelotrichales(100);Erysipelotrichaceae(100);Catenibacterium(100);	29	0	116	113	0	0	0	0	0	0	0
Otu000028	Bacteria(100);Firmicutes(100);Bacilli(100);Lactobacillales(100);Lactobacillaceae(100);Lactobacillus(100);	0	0	36	0	0	0	0	0	0	0	0
Otu000029	Bacteria(100);Firmicutes(100);Bacilli(100);Lactobacillales(100);Lactobacillaceae(100);Lactobacillus(100);	0	0	0	0	1	0	0	0	0	0	0
Otu000030	Bacteria(100);Firmicutes(100);Clostridia(100);Clostridiales(100);Lachnospiraceae(100);Dorea(100);	40	159	156	77	72	12	20	16	18	27	22
Otu000031	Bacteria(100);Actinobacteria(100);Actinobacteria(100);Bifidobacteriales(100);Bifidobacteriaceae(100);Bifidobacterium(100);	0	20	26	56	312	1	10	2	9	4	15
Otu000032	Bacteria(100);Bacteroidetes(100);Bacteroidia(100);Bacteroidales(100);Bacteroidaceae(100);Bacteroides(100);	0	0	1	5	11	0	50	1	2	0	0
Otu000033	Bacteria(100);Firmicutes(100);Clostridia(100);Clostridiales(100);Clostridiaceae_1(100);Clostridium_sensu_stricto_1(100);	14	127	1	16	71	42	20	25	20	20	87
Otu000034	Bacteria(100);Firmicutes(100);Clostridia(100);Clostridiales(100);Ruminococcaceae(100);unclassified(98);	54	89	0	0	46	153	22	90	40	158	44
Otu000035	Bacteria(100);Firmicutes(100);Negativicutes(100);Selenomonadales(100);Veillonellaceae(100);Dialister(100);	716	0	0	0	0	0	0	0	0	0	0
Otu000036	Bacteria(100);Firmicutes(100);Clostridia(100);Clostridiales(100);Christensenellaceae(100);unclassified(100);	196	8	0	111	101	48	35	16	14	8	29
Otu000037	Bacteria(100);Firmicutes(100);Erysipelotrichia(100);Erysipelotrichales(100);Erysipelotrichaceae(100);Incertae_Sedis(100);	12	1	33	84	0	10	2	14	10	4	12
Otu000038	Bacteria(100);Firmicutes(100);Clostridia(100);Clostridiales(100);Lachnospiraceae(100);Anaerostipes(100);	5	87	349	95	113	34	71	24	14	49	94
Otu000039	Bacteria(100);Firmicutes(100);Clostridia(100);Clostridiales(100);Lachnospiraceae(100);Lachnospira(99);	34	10	6	25	4	81	105	70	40	106	83
Otu000040	Bacteria(100);Firmicutes(66);Clostridia(65);Clostridiales(65);unclassified(65);unclassified(65);	0	18	256	0	0	44	0	35	0	86	88
Otu000041	Bacteria(100);Bacteroidetes(100);Bacteroidia(100);Bacteroidales(100);Bacteroidaceae(100);Bacteroides(100);	0	0	0	19	0	7	5	7	1	2	5
Otu000042	Bacteria(100);Firmicutes(100);Clostridia(100);Clostridiales(100);Lachnospiraceae(100);Incertae_Sedis(99);	37	19	53	99	259	1	72	11	43	25	65
Otu000043	Bacteria(100);Bacteroidetes(100);Bacteroidia(100);Bacteroidales(100);Prevotellaceae(100);Prevotella(100);	413	0	0	0	0	0	191	0	269	0	0
Otu000044	Bacteria(100);Bacteroidetes(100);Bacteroidia(100);Bacteroidales(100);Rikenellaceae(100);Alistipes(100);	0	12	139	45	23	68	46	121	88	25	84
Otu000045	Bacteria(100);Firmicutes(100);Clostridia(100);Clostridiales(100);Peptostreptococcaceae(100);Incertae_Sedis(100);	5	200	4	40	22	17	10	13	14	13	42
Otu000046	Bacteria(100);Bacteroidetes(100);Bacteroidia(100);Bacteroidales(100);Porphyromonadaceae(100);Parabacteroides(100);	5	4	2	9	3	53	3	45	10	16	29
Otu000047	Bacteria(100);Firmicutes(100);Bacilli(100);Lactobacillales(100);Enterococcaceae(99);Enterococcus(95);	0	0	0	0	2	0	0	1	0	0	0
Otu000048	Bacteria(100);Bacteroidetes(100);Bacteroidia(100);Bacteroidales(100);Rikenellaceae(100);RC9_gut_group(100);	140	0	0	0	0	0	16	0	53	0	0
Otu000049	Bacteria(100);Firmicutes(100);Clostridia(100);Clostridiales(100);Lachnospiraceae(100);Incertae_Sedis(75);	43	16	21	74	188	7	29	12	20	29	21
Otu000050	Bacteria(100);Firmicutes(100);Clostridia(100);Clostridiales(100);Lachnospiraceae(100);Blautia(100);	37	82	43	98	198	12	60	24	54	50	64
Otu000051	Bacteria(100);Firmicutes(100);Clostridia(100);Clostridiales(100);Ruminococcaceae(100);unclassified(99);	76	1	0	0	4	4	31	18	19	6	1
Otu000052	Bacteria(100);Firmicutes(100);Clostridia(100);Clostridiales(100);Ruminococcaceae(100);Anaerotruncus(100);	34	0	0	0	3	6	71	16	83	23	18
Otu000053	Bacteria(100);Bacteroidetes(100);Bacteroidia(100);Bacteroidales(100);Rikenellaceae(100);Alistipes(100);	1	20	8	13	8	8	1	6	2	5	8
Otu000054	Bacteria(100);Bacteroidetes(100);Bacteroidia(100);Bacteroidales(100);Rikenellaceae(100);RC9_gut_group(100);	86	0	26	0	0	0	75	0	41	0	0
Otu000055	Bacteria(100);Firmicutes(100);Clostridia(100);Clostridiales(100);Ruminococcaceae(97);unclassified(97);	3	369	0	0	0	48	123	55	8	123	138
Otu000056	Bacteria(100);Firmicutes(100);Negativicutes(100);Selenomonadales(100);Veillonellaceae(100);unclassified(100);	0	0	0	0	0	238	0	249	0	56	46
Otu000057	Bacteria(100);Firmicutes(100);Clostridia(100);Clostridiales(100);Lachnospiraceae(100);unclassified(82);	8	8	44	30	13	26	55	118	240	59	54
Otu000058	Bacteria(100);unclassified(94);unclassified(94);unclassified(94);unclassified(94);unclassified(94);	28	216	0	0	0	11	0	7	0	60	36
Otu000060	Bacteria(100);Firmicutes(100);Clostridia(100);Clostridiales(100);Ruminococcaceae(100);unclassified(100);	4	29	89	14	37	20	83	37	14	50	62
Otu000062	Bacteria(100);Proteobacteria(100);Gammaproteobacteria(100);Enterobacteriales(100);Enterobacteriaceae(100);unclassified(99);	4	0	0	0	0	0	4	0	0	0	0
Otu000063	Bacteria(100);Firmicutes(100);Clostridia(100);Clostridiales(100);Ruminococcaceae(100);Incertae_Sedis(71);	36	258	0	0	0	49	54	57	141	80	108
Otu000064	Bacteria(100);Firmicutes(97);Clostridia(94);Clostridiales(93);Ruminococcaceae(82);unclassified(82);	73	3	6	0	100	6	15	16	21	3	10
Otu000065	Bacteria(100);Firmicutes(100);Clostridia(100);Clostridiales(100);Ruminococcaceae(100);unclassified(100);	44	3	1	11	10	5	57	5	22	4	4
Otu000066	Bacteria(100);Bacteroidetes(100);Bacteroidia(100);Bacteroidales(100);Porphyromonadaceae(100);Barnesiella(100);	2	25	39	54	0	5	20	5	59	1	1
Otu000067	Bacteria(100);Bacteroidetes(100);Bacteroidia(100);Bacteroidales(100);Prevotellaceae(100);Alloprevotella(100);	0	2	0	0	0	13	169	32	275	4	11
Otu000068	Bacteria(100);Firmicutes(100);Clostridia(100);Clostridiales(100);Lachnospiraceae(100);Coprococcus(95);	24	19	69	49	61	4	18	13	22	14	28
Otu000069	Bacteria(100);Firmicutes(100);Clostridia(100);Clostridiales(100);Ruminococcaceae(100);unclassified(67);	53	3	0	2	0	15	13	34	48	12	30
Otu000070	Bacteria(100);Firmicutes(100);Clostridia(100);Clostridiales(100);Ruminococcaceae(100);unclassified(98);	53	5	29	1	9	34	33	13	29	18	11
Otu000071	Bacteria(100);unclassified(100);unclassified(100);unclassified(100);unclassified(100);unclassified(100);	0	14	0	0	0	52	0	40	0	125	69
Otu000072	Bacteria(100);Firmicutes(100);Bacilli(100);Lactobacillales(100);Streptococcaceae(100);Streptococcus(100);	0	12	11	77	98	27	24	14	8	8	19
Otu000073	Bacteria(100);Firmicutes(100);Clostridia(100);Clostridiales(100);Ruminococcaceae(100);unclassified(100);	89	1	5	0	3	24	28	13	14	9	15
Otu000074	Bacteria(100);Firmicutes(100);Clostridia(100);Clostridiales(100);Lachnospiraceae(100);Blautia(100);	16	4	6	70	151	1	16	4	9	7	6
Otu000075	Bacteria(100);Firmicutes(100);Clostridia(100);Clostridiales(100);Lachnospiraceae(100);Lachnospira(100);	9	9	1	2	1	146	36	59	73	15	10
Otu000076	Bacteria(100);Bacteroidetes(100);Bacteroidia(100);Bacteroidales(100);Bacteroidaceae(100);Bacteroides(100);	0	1	9	0	0	0	0	0	0	4	4
Otu000077	Bacteria(100);Firmicutes(100);Clostridia(95);Clostridiales(94);Ruminococcaceae(83);unclassified(83);	3	0	91	188	0	16	2	29	1	128	113
Otu000078	Bacteria(100);Actinobacteria(100);Coriobacteriia(100);Coriobacteriales(100);Coriobacteriaceae(100);unclassified(98);	7	13	2	46	0	1	5	2	8	0	2
Otu000079	Bacteria(100);Firmicutes(100);Clostridia(100);Clostridiales(100);Christensenellaceae(100);unclassified(100);	13	3	18	51	14	9	17	6	19	6	19
Otu000080	Bacteria(100);Firmicutes(100);Clostridia(100);Clostridiales(100);Lachnospiraceae(100);Blautia(97);	9	50	28	38	112	9	7	22	3	17	26
Otu000081	Bacteria(100);Firmicutes(100);Clostridia(100);Clostridiales(100);Ruminococcaceae(95);Incertae_Sedis(72);	0	20	0	0	298	0	0	0	0	0	0
Otu000082	Bacteria(100);Firmicutes(100);Erysipelotrichia(100);Erysipelotrichales(100);Erysipelotrichaceae(100);Turicibacter(100);	2	54	0	3	22	2	9	7	2	6	11
Otu000083	Bacteria(100);Firmicutes(100);Clostridia(100);Clostridiales(100);Lachnospiraceae(100);Roseburia(100);	32	89	12	125	0	20	3	49	9	50	37
Otu000084	Bacteria(100);Firmicutes(98);Clostridia(98);Clostridiales(98);unclassified(98);unclassified(98);	0	0	0	0	0	0	101	0	57	0	0
Otu000085	Bacteria(100);Actinobacteria(100);Actinobacteria(100);Bifidobacteriales(100);Bifidobacteriaceae(100);Bifidobacterium(100);	0	0	11	41	0	0	0	0	0	0	0
Otu000086	Bacteria(100);Tenericutes(100);Mollicutes(100);NB1-n(99);unclassified(99);unclassified(99);	0	0	0	0	0	121	1	95	10	0	3
Otu000087	Bacteria(100);Firmicutes(100);Clostridia(100);Clostridiales(100);Lachnospiraceae(100);unclassified(100);	1	0	26	4	0	0	56	0	68	0	0
Otu000088	Bacteria(100);Actinobacteria(100);Coriobacteriia(100);Coriobacteriales(100);Coriobacteriaceae(100);Slackia(100);	6	1	7	8	0	0	7	0	3	0	0
Otu000089	Bacteria(100);Bacteroidetes(100);Bacteroidia(100);Bacteroidales(100);Porphyromonadaceae(100);Parabacteroides(100);	0	0	1	3	0	0	8	0	1	0	0
Otu000090	Bacteria(100);Firmicutes(100);Clostridia(100);Clostridiales(100);Christensenellaceae(100);unclassified(100);	15	2	0	0	0	16	9	24	3	6	13
Otu000091	Bacteria(100);Firmicutes(100);Clostridia(100);Clostridiales(100);Lachnospiraceae(100);Incertae_Sedis(96);	11	17	7	0	25	11	13	20	15	31	38
Otu000094	Bacteria(100);Bacteroidetes(100);Bacteroidia(100);Bacteroidales(100);unclassified(100);unclassified(100);	126	0	0	0	0	0	0	0	0	0	0
Otu000095	Bacteria(100);Firmicutes(100);Clostridia(100);Clostridiales(100);Lachnospiraceae(100);unclassified(99);	14	10	0	2	47	3	53	12	41	20	11
Otu000096	Bacteria(100);Bacteroidetes(100);Bacteroidia(100);Bacteroidales(100);Prevotellaceae(100);Prevotella(100);	0	0	0	0	0	5	19	45	151	0	1
Otu000097	Bacteria(100);Bacteroidetes(100);Bacteroidia(100);Bacteroidales(100);Rikenellaceae(100);Alistipes(100);	0	13	0	0	0	60	0	92	0	21	50
Otu000098	Bacteria(100);Firmicutes(100);Bacilli(100);Lactobacillales(100);Streptococcaceae(100);Streptococcus(100);	0	0	2	1	0	0	1	0	0	0	0
Otu000099	Bacteria(100);Firmicutes(100);Clostridia(100);Clostridiales(100);Lachnospiraceae(100);Lachnospira(100);	13	3	0	5	6	72	0	70	19	11	8
Otu000100	Bacteria(100);Firmicutes(100);Clostridia(100);Clostridiales(100);Ruminococcaceae(100);unclassified(96);	1	5	2	0	15	10	61	12	9	7	3
Otu000101	Bacteria(100);Firmicutes(100);Clostridia(100);Clostridiales(100);Lachnospiraceae(100);Roseburia(100);	3	5	9	184	13	10	1	11	17	9	7
Otu000102	Bacteria(100);Firmicutes(100);Clostridia(100);Clostridiales(100);Lachnospiraceae(100);Dorea(100);	4	25	10	15	32	4	17	11	8	10	6
Otu000103	Bacteria(100);Bacteroidetes(100);Bacteroidia(100);Bacteroidales(100);Prevotellaceae(96);Prevotella(60);	0	3	40	0	0	64	0	35	0	22	32
Otu000104	Bacteria(100);Actinobacteria(100);Coriobacteriia(100);Coriobacteriales(100);Coriobacteriaceae(100);unclassified(100);	21	8	44	5	0	2	8	1	5	0	2
Otu000105	Bacteria(100);Firmicutes(100);Clostridia(100);Clostridiales(100);Lachnospiraceae(100);Coprococcus(100);	6	6	19	28	5	1	11	9	6	9	12
Otu000106	Bacteria(100);unclassified(82);unclassified(82);unclassified(82);unclassified(82);unclassified(82);	10	15	3	97	33	35	4	24	9	29	17
Otu000107	Bacteria(100);Firmicutes(100);Clostridia(100);Clostridiales(100);Ruminococcaceae(100);unclassified(100);	64	0	0	0	2	0	7	0	7	0	0
Otu000108	Bacteria(100);Bacteroidetes(100);Bacteroidia(100);Bacteroidales(100);Rikenellaceae(100);dgA-11_gut_group(100);	33	0	0	0	0	0	0	0	0	0	0
Otu000109	Bacteria(100);Actinobacteria(100);Actinobacteria(100);Bifidobacteriales(100);Bifidobacteriaceae(100);Bifidobacterium(100);	0	0	0	12	0	0	0	0	0	0	0
Otu000110	Bacteria(100);Proteobacteria(100);Betaproteobacteria(100);Burkholderiales(100);Alcaligenaceae(100);Parasutterella(100);	0	0	0	1	0	0	25	0	72	0	0
Otu000112	Bacteria(100);Bacteroidetes(100);Bacteroidia(100);Bacteroidales(100);Rikenellaceae(100);Alistipes(100);	0	4	0	12	5	44	4	30	4	7	10
Otu000113	Bacteria(100);Proteobacteria(100);Gammaproteobacteria(100);Enterobacteriales(100);Enterobacteriaceae(100);Hafnia(94);	0	0	0	0	0	2	345	0	3	0	0
Otu000115	Bacteria(100);Firmicutes(100);Clostridia(100);Clostridiales(100);Ruminococcaceae(100);Incertae_Sedis(59);	18	0	0	0	1	17	0	9	1	0	0
Otu000116	Bacteria(100);Bacteroidetes(100);Bacteroidia(100);Bacteroidales(100);Rikenellaceae(100);Alistipes(100);	0	0	4	1	0	15	2	12	2	4	2
Otu000118	Bacteria(100);unclassified(52);unclassified(52);unclassified(52);unclassified(52);unclassified(52);	0	0	0	0	0	39	27	28	31	18	51
Otu000119	Bacteria(100);Firmicutes(100);Bacilli(100);Lactobacillales(100);Streptococcaceae(100);Lactococcus(100);	0	0	1	89	7	1	3	0	0	0	1
Otu000120	Bacteria(100);Bacteroidetes(100);Bacteroidia(100);Bacteroidales(100);Porphyromonadaceae(100);Odoribacter(100);	16	1	4	1	0	6	8	4	10	0	1
Otu000121	Bacteria(100);Firmicutes(100);Clostridia(100);Clostridiales(100);Ruminococcaceae(100);unclassified(97);	1	8	5	5	10	1	2	2	0	1	0
Otu000122	Bacteria(100);Bacteroidetes(100);Bacteroidia(100);Bacteroidales(100);Rikenellaceae(100);Alistipes(100);	6	1	5	6	0	23	2	18	5	7	9
Otu000123	Bacteria(100);Firmicutes(100);Clostridia(100);Clostridiales(100);vadinBB60(100);unclassified(100);	0	0	0	0	0	101	0	41	0	1	3
Otu000125	Bacteria(100);Bacteroidetes(100);Bacteroidia(100);Bacteroidales(100);Prevotellaceae(100);Alloprevotella(100);	98	0	9	0	0	0	0	0	0	0	0
Otu000126	Bacteria(100);Firmicutes(100);Clostridia(100);Clostridiales(100);Ruminococcaceae(100);Flavonifractor(100);	0	0	0	8	0	0	0	0	0	0	1
Otu000127	Bacteria(100);Bacteroidetes(100);Bacteroidia(100);Bacteroidales(100);Prevotellaceae(100);Prevotella(100);	9	1	0	0	0	4	12	11	65	0	2
Otu000128	Bacteria(100);Firmicutes(100);Clostridia(100);Clostridiales(100);Lachnospiraceae(100);unclassified(60);	7	60	2	10	33	11	7	8	4	27	40
Otu000129	Bacteria(100);Firmicutes(100);Clostridia(100);Clostridiales(100);Peptostreptococcaceae(100);Incertae_Sedis(99);	0	1	0	0	0	0	0	0	0	0	0
Otu000130	Bacteria(100);unclassified(72);unclassified(72);unclassified(72);unclassified(72);unclassified(72);	3	4	8	0	0	6	0	4	0	2	5
Otu000131	Bacteria(100);unclassified(100);unclassified(100);unclassified(100);unclassified(100);unclassified(100);	1	47	0	0	3	2	14	1	2	12	12
Otu000132	Bacteria(100);Proteobacteria(100);Gammaproteobacteria(100);Enterobacteriales(100);Enterobacteriaceae(100);unclassified(100);	4	0	0	0	0	0	2	0	0	0	0
Otu000133	Bacteria(100);Firmicutes(100);Clostridia(100);Clostridiales(100);Lachnospiraceae(100);Incertae_Sedis(81);	5	0	1	11	4	14	19	15	23	5	6
Otu000134	Bacteria(100);Firmicutes(100);Clostridia(100);Clostridiales(100);Lachnospiraceae(100);unclassified(100);	0	0	1	0	1	2	5	2	4	0	2
Otu000135	Bacteria(100);Proteobacteria(100);Deltaproteobacteria(100);Desulfovibrionales(100);Desulfovibrionaceae(100);Bilophila(100);	6	1	4	0	0	10	1	3	0	1	0
Otu000136	Bacteria(100);Firmicutes(100);Clostridia(100);Clostridiales(100);vadinBB60(100);unclassified(100);	6	0	0	0	0	57	0	24	0	0	0
Otu000137	Bacteria(100);unclassified(73);unclassified(73);unclassified(73);unclassified(73);unclassified(73);	0	7	0	0	7	4	45	3	5	15	24
Otu000138	Bacteria(100);Firmicutes(100);Clostridia(100);Clostridiales(100);Ruminococcaceae(99);unclassified(99);	15	0	0	0	0	14	0	7	0	2	7
Otu000139	Bacteria(100);Bacteroidetes(100);Bacteroidia(100);Bacteroidales(100);Prevotellaceae(100);Prevotella(100);	4	0	0	0	0	0	0	0	0	0	0
Otu000140	Bacteria(100);Tenericutes(100);Mollicutes(100);RF9(100);unclassified(100);unclassified(100);	19	0	31	0	0	3	0	4	0	4	8
Otu000141	Bacteria(100);Firmicutes(100);Clostridia(100);Clostridiales(100);Ruminococcaceae(100);Sporobacter(74);	8	7	3	3	2	12	0	7	0	7	18
Otu000142	Bacteria(100);Firmicutes(100);Clostridia(100);Clostridiales(100);Lachnospiraceae(100);Incertae_Sedis(100);	9	0	0	0	0	8	29	15	37	2	10
Otu000143	Bacteria(100);Actinobacteria(100);Coriobacteriia(100);Coriobacteriales(100);Coriobacteriaceae(100);Eggerthella(100);	0	0	1	0	0	0	0	0	1	0	0
Otu000144	Bacteria(100);Firmicutes(100);Negativicutes(100);Selenomonadales(100);Acidaminococcaceae(100);Phascolarctobacterium(100);	0	0	0	0	8	118	0	69	0	9	18
Otu000145	Bacteria(100);Firmicutes(100);Clostridia(100);Clostridiales(100);Ruminococcaceae(100);unclassified(98);	8	4	6	40	9	6	2	7	4	4	17
Otu000146	Bacteria(100);Firmicutes(100);Clostridia(100);Clostridiales(100);Ruminococcaceae(100);unclassified(100);	10	0	0	0	0	9	0	7	4	5	6
Otu000147	Bacteria(100);Firmicutes(100);Clostridia(100);Clostridiales(100);Lachnospiraceae(100);Incertae_Sedis(64);	1	6	3	7	53	12	3	16	5	13	38
Otu000148	Bacteria(100);Firmicutes(100);Clostridia(100);Clostridiales(100);Ruminococcaceae(100);Incertae_Sedis(100);	0	25	1	2	7	0	1	1	0	13	3
Otu000149	Bacteria(100);Bacteroidetes(100);Bacteroidia(100);Bacteroidales(100);Prevotellaceae(100);Paraprevotella(100);	38	0	7	0	16	0	0	0	0	0	0
Otu000150	Bacteria(100);Firmicutes(100);Clostridia(100);Clostridiales(100);Lachnospiraceae(100);Roseburia(98);	7	14	3	17	12	1	3	7	4	6	13
Otu000151	Bacteria(100);Firmicutes(100);Clostridia(100);Clostridiales(100);Ruminococcaceae(100);Intestinimonas(100);	3	21	11	13	0	3	7	6	7	5	10
Otu000152	Bacteria(100);Firmicutes(100);Clostridia(100);Clostridiales(100);Lachnospiraceae(100);unclassified(100);	2	2	1	29	2	40	8	17	67	12	21
Otu000153	Bacteria(100);Firmicutes(100);Bacilli(100);Lactobacillales(100);Streptococcaceae(100);Streptococcus(100);	1	3	4	17	16	0	7	0	9	3	0
Otu000154	Bacteria(100);Firmicutes(100);Clostridia(100);Clostridiales(100);Lachnospiraceae(100);Incertae_Sedis(89);	12	0	0	1	1	26	1	10	2	7	9
Otu000155	Bacteria(100);unclassified(99);unclassified(99);unclassified(99);unclassified(99);unclassified(99);	1	12	0	0	0	2	30	1	0	1	5
Otu000156	Bacteria(100);Firmicutes(100);Clostridia(100);Clostridiales(100);Ruminococcaceae(100);Incertae_Sedis(100);	0	0	0	13	16	5	24	3	9	5	7
Otu000157	Bacteria(100);Proteobacteria(100);Betaproteobacteria(100);Burkholderiales(100);Alcaligenaceae(100);Sutterella(100);	0	0	0	0	0	61	0	23	0	2	7
Otu000158	Bacteria(100);Bacteroidetes(100);Bacteroidia(100);Bacteroidales(100);Bacteroidaceae(100);Bacteroides(100);	8	0	0	0	0	0	4	0	37	0	1
Otu000159	Bacteria(100);Firmicutes(100);Clostridia(100);Clostridiales(100);Ruminococcaceae(100);unclassified(75);	12	1	3	0	0	0	3	2	1	2	6
Otu000160	Bacteria(100);Firmicutes(100);Clostridia(100);Clostridiales(100);Christensenellaceae(100);unclassified(100);	9	9	2	0	16	0	8	0	0	0	0
Otu000161	Bacteria(100);Bacteroidetes(100);unclassified(100);unclassified(100);unclassified(100);unclassified(100);	0	2	0	0	0	47	0	22	0	13	10
Otu000164	Bacteria(100);Firmicutes(100);Clostridia(100);Clostridiales(100);Family_XIII(97);unclassified(63);	0	20	21	0	3	2	2	0	0	2	1
Otu000165	Bacteria(100);Proteobacteria(100);Deltaproteobacteria(100);Desulfovibrionales(100);Desulfovibrionaceae(100);Desulfovibrio(100);	9	0	0	0	0	0	0	0	0	0	0
Otu000166	Bacteria(100);Tenericutes(100);Mollicutes(100);RF9(100);unclassified(100);unclassified(100);	0	12	0	0	0	18	0	26	0	16	24
Otu000167	Bacteria(100);Bacteroidetes(100);Bacteroidia(100);Bacteroidales(100);Bacteroidaceae(100);Bacteroides(100);	3	0	0	0	11	0	4	0	6	0	0
Otu000169	Bacteria(100);Firmicutes(100);Erysipelotrichia(100);Erysipelotrichales(100);Erysipelotrichaceae(100);Incertae_Sedis(100);	0	0	0	0	0	0	1	0	0	0	0
Otu000170	Bacteria(100);Bacteroidetes(100);Bacteroidia(100);Bacteroidales(100);Bacteroidaceae(100);Bacteroides(100);	0	0	0	5	0	0	12	0	14	0	0
Otu000171	Bacteria(100);Firmicutes(100);Clostridia(100);Clostridiales(100);unclassified(97);unclassified(97);	10	19	0	0	1	7	0	6	0	11	5
Otu000172	Bacteria(100);unclassified(100);unclassified(100);unclassified(100);unclassified(100);unclassified(100);	0	0	0	0	0	0	27	0	28	0	0
Otu000173	Bacteria(100);Proteobacteria(100);Betaproteobacteria(100);Burkholderiales(100);Alcaligenaceae(100);Sutterella(100);	0	0	0	2	0	23	0	2	0	1	0
Otu000174	Bacteria(100);Proteobacteria(100);Betaproteobacteria(100);Burkholderiales(100);Oxalobacteraceae(99);unclassified(63);	3	0	1	0	0	4	0	6	0	2	3
Otu000175	Bacteria(100);Firmicutes(99);Clostridia(99);Clostridiales(99);Christensenellaceae(98);unclassified(98);	0	14	32	0	1	9	0	8	0	0	3
Otu000177	Bacteria(100);Bacteroidetes(100);Bacteroidia(100);Bacteroidales(100);Porphyromonadaceae(100);Butyricimonas(100);	0	0	0	6	0	6	0	4	0	0	2
Otu000178	Bacteria(100);Firmicutes(100);Erysipelotrichia(100);Erysipelotrichales(100);Erysipelotrichaceae(100);Incertae_Sedis(100);	0	0	0	0	11	0	0	0	0	0	0
Otu000179	Bacteria(100);Firmicutes(100);Clostridia(100);Clostridiales(100);Lachnospiraceae(100);Incertae_Sedis(67);	7	0	0	1	0	11	9	10	27	0	1
Otu000180	Bacteria(100);Firmicutes(100);Clostridia(100);Clostridiales(100);Ruminococcaceae(100);Oscillibacter(95);	0	0	0	0	0	1	0	0	1	1	1
Otu000181	Bacteria(100);Firmicutes(100);Negativicutes(100);Selenomonadales(100);Acidaminococcaceae(100);Phascolarctobacterium(100);	2	0	1	6	0	0	0	0	0	0	0
Otu000182	Bacteria(100);Firmicutes(100);Clostridia(100);Clostridiales(100);Ruminococcaceae(100);Incertae_Sedis(100);	0	6	19	0	15	2	13	0	1	4	10
Otu000183	Bacteria(100);Bacteroidetes(100);Bacteroidia(100);Bacteroidales(100);Porphyromonadaceae(100);Butyricimonas(100);	0	0	0	0	0	0	8	0	17	0	0
Otu000184	Bacteria(100);Firmicutes(100);Clostridia(100);Clostridiales(100);Lachnospiraceae(100);unclassified(100);	2	3	3	20	9	1	9	8	9	4	2
Otu000185	Bacteria(100);Bacteroidetes(100);Bacteroidia(100);Bacteroidales(100);unclassified(100);unclassified(100);	0	0	0	0	0	0	15	0	32	0	0
Otu000186	Bacteria(100);Firmicutes(100);Clostridia(100);Clostridiales(100);Family_XI(100);Finegoldia(100);	2	0	1	0	0	0	0	0	0	0	2
Otu000187	Bacteria(100);Firmicutes(100);Clostridia(100);Clostridiales(100);Ruminococcaceae(100);unclassified(100);	0	0	3	7	5	1	1	3	0	1	0
Otu000188	Bacteria(100);Firmicutes(100);Clostridia(100);Clostridiales(100);Christensenellaceae(100);unclassified(100);	3	46	0	0	1	2	0	0	0	3	4
Otu000189	Bacteria(100);Firmicutes(100);Clostridia(100);Clostridiales(100);Lachnospiraceae(100);Blautia(88);	1	4	1	22	16	4	0	6	1	19	9
Otu000190	Bacteria(100);Firmicutes(100);Clostridia(100);Clostridiales(100);Lachnospiraceae(100);Roseburia(79);	6	18	4	0	6	7	5	15	2	9	11
Otu000191	Bacteria(100);Actinobacteria(100);Coriobacteriia(100);Coriobacteriales(100);Coriobacteriaceae(100);unclassified(100);	0	1	0	0	0	0	0	0	0	0	0
Otu000192	Bacteria(100);Actinobacteria(100);Coriobacteriia(95);Coriobacteriales(95);Coriobacteriaceae(95);unclassified(95);	0	4	0	1	0	0	0	4	0	1	1
Otu000193	Bacteria(100);Firmicutes(100);Negativicutes(100);Selenomonadales(100);Veillonellaceae(100);Veillonella(100);	1	4	2	48	8	4	4	15	2	2	4
Otu000194	Bacteria(100);Firmicutes(100);Clostridia(100);Clostridiales(100);Lachnospiraceae(100);unclassified(100);	1	1	0	17	24	3	17	6	10	3	11
Otu000195	Bacteria(100);Bacteroidetes(100);Bacteroidia(100);Bacteroidales(100);Porphyromonadaceae(100);Butyricimonas(100);	3	0	6	0	1	3	0	3	0	1	1
Otu000196	Bacteria(100);unclassified(100);unclassified(100);unclassified(100);unclassified(100);unclassified(100);	20	4	0	0	0	0	7	0	1	0	6
Otu000197	Bacteria(100);unclassified(75);unclassified(75);unclassified(75);unclassified(75);unclassified(75);	6	1	0	0	0	6	0	10	0	1	5
Otu000198	Bacteria(100);Tenericutes(100);Mollicutes(100);RF9(100);unclassified(100);unclassified(100);	12	8	0	0	0	0	0	1	0	2	0
Otu000199	Bacteria(100);Tenericutes(100);Mollicutes(100);RF9(100);unclassified(100);unclassified(100);	0	0	0	0	0	0	11	0	36	0	0
Otu000200	Bacteria(100);Bacteroidetes(100);Bacteroidia(100);Bacteroidales(100);Porphyromonadaceae(100);Parabacteroides(100);	0	0	1	0	0	2	0	0	0	0	0
Otu000201	Bacteria(100);Firmicutes(82);Clostridia(81);Clostridiales(81);Christensenellaceae(54);unclassified(54);	0	0	0	0	0	0	9	0	3	0	0
Otu000202	Bacteria(100);Actinobacteria(100);Coriobacteriia(100);Coriobacteriales(100);Coriobacteriaceae(100);unclassified(100);	0	0	0	1	11	0	0	0	0	0	0
Otu000203	Bacteria(100);Firmicutes(100);Clostridia(100);Clostridiales(100);Lachnospiraceae(100);unclassified(92);	5	0	2	36	10	0	11	1	7	2	0
Otu000204	Bacteria(100);Firmicutes(100);Clostridia(100);Clostridiales(100);Lachnospiraceae(100);Blautia(74);	0	0	1	0	0	4	3	9	15	4	2
Otu000205	Bacteria(100);Firmicutes(78);Clostridia(66);Clostridiales(65);unclassified(100);unclassified(100);	15	2	0	0	0	5	2	7	9	4	6
Otu000206	Bacteria(100);Firmicutes(100);Clostridia(100);Clostridiales(100);Ruminococcaceae(100);Intestinimonas(100);	0	0	0	0	0	0	0	0	0	0	1
Otu000207	Bacteria(100);Bacteroidetes(100);Bacteroidia(100);Bacteroidales(100);Bacteroidaceae(100);Bacteroides(100);	1	0	0	0	0	0	2	0	6	0	0
Otu000208	Bacteria(100);Firmicutes(100);Clostridia(100);Clostridiales(100);Ruminococcaceae(100);Ruminococcus(100);	9	1	0	0	0	2	0	11	0	3	5
Otu000209	Bacteria(100);Firmicutes(100);Clostridia(100);Clostridiales(100);Family_XIII(99);Incertae_Sedis(86);	2	0	0	0	1	0	8	0	3	0	0
Otu000211	Bacteria(100);Proteobacteria(100);Gammaproteobacteria(100);Pasteurellales(100);Pasteurellaceae(100);Haemophilus(97);	2	1	0	9	2	3	4	8	4	0	0
Otu000212	Bacteria(100);Bacteroidetes(100);Bacteroidia(100);Bacteroidales(100);Rikenellaceae(100);RC9_gut_group(100);	0	0	0	0	0	25	0	4	0	0	7
Otu000213	Bacteria(100);Firmicutes(96);Clostridia(95);Clostridiales(94);unclassified(94);unclassified(94);	1	0	0	0	0	0	0	0	0	0	0
Otu000214	Bacteria(100);Firmicutes(100);Clostridia(100);Clostridiales(100);Lachnospiraceae(100);Blautia(98);	2	2	0	48	1	1	1	0	2	0	2
Otu000215	Bacteria(100);Firmicutes(100);Erysipelotrichia(100);Erysipelotrichales(100);Erysipelotrichaceae(100);Holdemania(100);	9	0	0	0	0	0	0	0	0	0	0
Otu000216	Bacteria(100);Firmicutes(100);Clostridia(100);Clostridiales(100);Ruminococcaceae(100);Ruminococcus(100);	0	0	0	0	0	15	6	24	20	11	17
Otu000217	Bacteria(100);Bacteroidetes(100);Bacteroidia(100);Bacteroidales(100);Prevotellaceae(100);Prevotella(100);	0	0	0	0	0	0	19	0	18	0	0
Otu000218	Bacteria(100);Firmicutes(100);Clostridia(100);Clostridiales(100);Lachnospiraceae(100);Marvinbryantia(77);	2	10	4	0	4	1	0	1	2	3	6
Otu000219	Bacteria(100);Firmicutes(100);Bacilli(100);Lactobacillales(100);Streptococcaceae(100);Streptococcus(100);	0	0	0	2	0	0	2	0	0	0	1
Otu000220	Bacteria(100);Firmicutes(100);Clostridia(100);Clostridiales(100);Ruminococcaceae(100);Oscillibacter(72);	0	0	0	2	1	1	3	0	0	4	0
Otu000221	Bacteria(100);unclassified(76);unclassified(76);unclassified(76);unclassified(76);unclassified(76);	1	0	0	0	0	31	0	8	0	6	8
Otu000222	Bacteria(100);Firmicutes(100);Clostridia(100);Clostridiales(100);Clostridiaceae_1(100);unclassified(80);	0	0	0	0	0	0	32	0	6	0	0
Otu000223	Bacteria(100);Firmicutes(100);Clostridia(100);Clostridiales(100);Lachnospiraceae(100);unclassified(94);	0	0	0	0	0	0	0	0	0	1	0
Otu000224	Bacteria(100);Bacteroidetes(100);Bacteroidia(100);Bacteroidales(100);Prevotellaceae(100);Paraprevotella(100);	0	0	0	0	0	0	20	0	13	0	0
Otu000225	Bacteria(100);Bacteroidetes(100);Bacteroidia(100);Bacteroidales(100);Rikenellaceae(100);RC9_gut_group(99);	0	0	0	0	0	12	0	12	0	0	0
Otu000226	Bacteria(100);Firmicutes(100);Clostridia(100);Clostridiales(100);Lachnospiraceae(100);unclassified(98);	20	0	0	0	0	0	0	0	1	0	0
Otu000227	Bacteria(100);Firmicutes(100);Clostridia(100);Clostridiales(100);Ruminococcaceae(100);unclassified(100);	0	0	0	0	0	0	1	0	1	0	0
Otu000228	Bacteria(100);Firmicutes(100);Clostridia(100);Clostridiales(100);Defluviitaleaceae(98);Incertae_Sedis(98);	17	0	1	6	1	0	0	0	0	0	0
Otu000229	Bacteria(100);Firmicutes(100);Clostridia(100);Clostridiales(100);Lachnospiraceae(100);Incertae_Sedis(94);	1	0	0	0	0	0	3	0	0	0	0
Otu000230	Bacteria(100);unclassified(87);unclassified(87);unclassified(87);unclassified(87);unclassified(87);	0	0	24	0	0	0	0	0	0	0	0
Otu000231	Bacteria(100);Bacteroidetes(100);Bacteroidia(100);Bacteroidales(100);Porphyromonadaceae(100);Butyricimonas(100);	0	0	0	7	0	2	0	1	2	0	0
Otu000232	Bacteria(100);Firmicutes(100);Clostridia(100);Clostridiales(100);Lachnospiraceae(100);Incertae_Sedis(53);	3	0	0	1	1	15	6	12	10	3	6
Otu000233	Bacteria(100);Firmicutes(100);Clostridia(100);Clostridiales(100);Lachnospiraceae(100);unclassified(100);	4	0	0	0	0	0	0	0	0	0	0
Otu000235	Bacteria(100);Firmicutes(100);Clostridia(100);Clostridiales(100);Ruminococcaceae(100);Sporobacter(52);	0	0	0	0	2	8	0	7	0	6	17
Otu000236	Bacteria(100);unclassified(100);unclassified(100);unclassified(100);unclassified(100);unclassified(100);	2	14	0	0	0	9	0	4	0	3	17
Otu000237	Bacteria(100);Firmicutes(100);Clostridia(100);Clostridiales(100);Ruminococcaceae(100);Incertae_Sedis(100);	2	0	0	30	5	1	1	2	9	0	0
Otu000238	Bacteria(100);Firmicutes(100);Clostridia(100);Clostridiales(100);Ruminococcaceae(100);Ruminococcus(100);	0	5	2	0	8	0	0	0	4	0	0
Otu000239	Bacteria(100);Bacteroidetes(100);Bacteroidia(100);Bacteroidales(100);Prevotellaceae(100);Prevotella(100);	0	0	0	0	0	0	8	0	12	0	0
Otu000240	Bacteria(100);unclassified(52);unclassified(52);unclassified(52);unclassified(52);unclassified(52);	0	2	0	0	0	12	0	6	0	0	0
Otu000241	Bacteria(100);Firmicutes(100);Clostridia(100);Clostridiales(100);Ruminococcaceae(100);Incertae_Sedis(100);	0	0	0	4	0	0	4	0	1	0	1
Otu000242	Bacteria(100);Firmicutes(100);Clostridia(100);Clostridiales(100);Ruminococcaceae(100);Incertae_Sedis(100);	5	0	1	0	0	7	0	3	0	0	3
Otu000243	Bacteria(100);unclassified(100);unclassified(100);unclassified(100);unclassified(100);unclassified(100);	1	0	2	0	3	1	4	0	0	1	4
Otu000244	Bacteria(100);Firmicutes(100);Clostridia(100);Clostridiales(100);Ruminococcaceae(100);unclassified(97);	1	0	0	2	1	4	6	6	4	0	0
Otu000245	Bacteria(100);Firmicutes(100);Clostridia(100);Clostridiales(100);Lachnospiraceae(100);Roseburia(90);	0	0	0	1	0	0	16	0	27	0	0
Otu000246	Bacteria(100);Firmicutes(100);Clostridia(100);Clostridiales(100);Ruminococcaceae(100);Ruminococcus(100);	0	0	7	1	0	0	3	0	1	0	0
Otu000247	Bacteria(100);Firmicutes(100);Clostridia(100);Clostridiales(100);Ruminococcaceae(100);unclassified(100);	3	5	1	0	0	2	1	1	0	2	7
Otu000249	Bacteria(100);Firmicutes(100);Clostridia(100);Clostridiales(100);Lachnospiraceae(100);unclassified(97);	2	0	9	20	0	0	2	2	1	0	0
Otu000250	Bacteria(100);Firmicutes(100);Clostridia(100);Clostridiales(100);Family_XIII(97);Incertae_Sedis(77);	0	5	4	3	2	0	3	2	0	1	1
Otu000251	Bacteria(100);Firmicutes(100);Erysipelotrichia(100);Erysipelotrichales(100);Erysipelotrichaceae(100);Holdemania(100);	0	3	0	1	1	1	0	0	1	0	3
Otu000252	Bacteria(100);Firmicutes(100);Clostridia(100);Clostridiales(100);Lachnospiraceae(100);unclassified(93);	7	0	0	3	0	3	1	1	5	1	1
Otu000254	Bacteria(100);Firmicutes(100);Clostridia(100);Clostridiales(100);Ruminococcaceae(100);Anaerotruncus(98);	3	1	0	2	1	2	1	1	3	1	7
Otu000255	Bacteria(100);Actinobacteria(100);Coriobacteriia(100);Coriobacteriales(100);Coriobacteriaceae(100);Adlercreutzia(100);	1	0	0	3	2	0	0	0	0	0	0
Otu000256	Bacteria(100);Firmicutes(100);Clostridia(100);Clostridiales(100);Ruminococcaceae(100);unclassified(100);	0	0	1	3	1	0	0	0	0	0	0
Otu000257	Bacteria(100);Firmicutes(100);Clostridia(100);Clostridiales(100);Ruminococcaceae(100);unclassified(77);	3	0	1	0	0	0	1	0	1	0	0
Otu000258	Bacteria(100);Firmicutes(100);Clostridia(100);Clostridiales(100);Christensenellaceae(100);unclassified(100);	2	4	19	0	0	3	2	4	3	5	3
Otu000259	Bacteria(100);Firmicutes(100);Clostridia(100);Clostridiales(100);Lachnospiraceae(100);Marvinbryantia(97);	4	5	2	5	0	1	3	4	1	0	4
Otu000260	Bacteria(100);unclassified(54);unclassified(54);unclassified(54);unclassified(54);unclassified(54);	3	0	0	0	0	0	10	0	14	0	0
Otu000261	Bacteria(100);Firmicutes(100);Clostridia(100);Clostridiales(100);Ruminococcaceae(100);Incertae_Sedis(100);	22	0	0	0	0	0	0	0	0	0	0
Otu000263	Bacteria(100);Bacteroidetes(100);Bacteroidia(100);Bacteroidales(100);Bacteroidaceae(100);Bacteroides(100);	0	0	0	0	0	6	0	20	0	3	1
Otu000264	Bacteria(100);Firmicutes(100);Clostridia(100);Clostridiales(100);Ruminococcaceae(100);Oscillibacter(100);	12	0	0	0	2	1	3	6	2	1	0
Otu000265	Bacteria(100);Lentisphaerae(100);Lentisphaeria(100);Victivallales(100);Victivallaceae(100);Victivallis(100);	0	0	0	0	0	3	0	1	0	0	0
Otu000266	Bacteria(100);Firmicutes(100);Clostridia(100);Clostridiales(100);Ruminococcaceae(100);unclassified(100);	4	1	0	0	0	1	1	0	0	0	1
Otu000267	Bacteria(100);Firmicutes(100);Clostridia(100);Clostridiales(100);Ruminococcaceae(100);Incertae_Sedis(100);	0	0	1	0	0	1	2	1	5	0	0
Otu000268	Bacteria(100);Proteobacteria(100);Deltaproteobacteria(100);Desulfovibrionales(100);Desulfovibrionaceae(100);Desulfovibrio(100);	0	0	0	0	0	44	0	35	0	11	3
Otu000269	Bacteria(100);Bacteroidetes(100);Bacteroidia(67);Bacteroidales(67);unclassified(67);unclassified(67);	0	0	0	0	0	7	0	1	0	0	1
Otu000270	Bacteria(100);Actinobacteria(100);Coriobacteriia(100);Coriobacteriales(100);Coriobacteriaceae(100);Olsenella(100);	0	1	0	0	0	1	0	0	0	2	5
Otu000271	Bacteria(100);Bacteroidetes(100);Bacteroidia(100);Bacteroidales(100);Porphyromonadaceae(100);Butyricimonas(100);	2	0	0	0	0	0	0	0	0	0	0
Otu000272	Bacteria(100);Firmicutes(100);Clostridia(100);Clostridiales(100);Lachnospiraceae(100);Incertae_Sedis(95);	0	0	1	28	2	0	0	1	0	0	0
Otu000273	Bacteria(100);Actinobacteria(100);Coriobacteriia(100);Coriobacteriales(100);Coriobacteriaceae(100);unclassified(95);	1	1	0	6	0	0	1	0	1	0	0
Otu000274	Bacteria(100);Tenericutes(100);Mollicutes(100);RF9(100);unclassified(100);unclassified(100);	11	0	0	0	0	0	0	0	0	0	0
Otu000275	Bacteria(100);unclassified(80);unclassified(80);unclassified(80);unclassified(80);unclassified(80);	0	0	0	8	5	0	0	0	0	0	0
Otu000276	Bacteria(100);Actinobacteria(100);Coriobacteriia(100);Coriobacteriales(100);Coriobacteriaceae(100);Gordonibacter(100);	0	1	0	0	0	0	1	0	0	0	1
Otu000277	Bacteria(100);Firmicutes(100);Clostridia(100);Clostridiales(100);Ruminococcaceae(100);Intestinimonas(97);	3	0	0	1	0	6	1	7	1	0	3
Otu000278	Bacteria(100);unclassified(99);unclassified(99);unclassified(99);unclassified(99);unclassified(99);	0	2	2	0	0	0	0	3	1	0	6
Otu000279	Bacteria(100);Firmicutes(100);Clostridia(100);Clostridiales(100);Family_XIII(100);Incertae_Sedis(100);	2	0	2	0	1	0	2	0	3	0	0
Otu000280	Bacteria(100);Firmicutes(100);Clostridia(100);Clostridiales(100);Ruminococcaceae(99);Incertae_Sedis(97);	0	7	0	0	0	6	0	9	0	6	11
Otu000281	Bacteria(100);Firmicutes(100);Clostridia(100);Clostridiales(100);Lachnospiraceae(100);Marvinbryantia(83);	5	0	1	0	2	2	5	2	2	2	1
Otu000282	Bacteria(100);Firmicutes(100);Clostridia(100);Clostridiales(100);Ruminococcaceae(100);unclassified(100);	12	0	0	0	0	0	0	0	0	0	0
Otu000283	Bacteria(100);Firmicutes(100);Clostridia(100);Clostridiales(100);Ruminococcaceae(100);unclassified(77);	3	9	1	3	1	0	2	1	2	5	3
Otu000284	Bacteria(100);unclassified(100);unclassified(100);unclassified(100);unclassified(100);unclassified(100);	7	3	0	0	1	1	1	0	0	1	0
Otu000285	Bacteria(100);unclassified(96);unclassified(96);unclassified(96);unclassified(96);unclassified(96);	3	0	0	0	0	0	0	0	0	0	0
Otu000286	Bacteria(100);Firmicutes(80);unclassified(100);unclassified(100);unclassified(100);unclassified(100);	0	0	0	0	0	6	0	13	0	0	2
Otu000287	Bacteria(100);Firmicutes(100);Clostridia(100);Clostridiales(100);Ruminococcaceae(100);unclassified(59);	0	0	1	0	0	0	0	0	0	0	0
Otu000288	Bacteria(100);Firmicutes(100);Clostridia(100);Clostridiales(100);Lachnospiraceae(100);unclassified(100);	0	4	9	3	6	2	1	4	8	0	2
Otu000289	Bacteria(100);Bacteroidetes(100);Bacteroidia(100);Bacteroidales(100);Prevotellaceae(91);unclassified(91);	0	0	0	0	0	23	0	26	0	5	15
Otu000290	Bacteria(100);Firmicutes(100);Clostridia(100);Clostridiales(100);Lachnospiraceae(100);unclassified(97);	0	3	2	0	4	1	1	2	2	1	4
Otu000291	Bacteria(100);Tenericutes(100);Mollicutes(100);RF9(100);unclassified(100);unclassified(100);	0	7	0	0	0	3	0	8	0	1	5
Otu000292	Bacteria(100);Actinobacteria(100);Coriobacteriia(100);Coriobacteriales(100);Coriobacteriaceae(100);unclassified(100);	1	0	3	0	0	0	2	0	5	0	0
Otu000293	Bacteria(100);Actinobacteria(100);Coriobacteriia(100);Coriobacteriales(100);Coriobacteriaceae(100);unclassified(100);	1	0	0	0	0	0	0	0	0	0	0
Otu000294	Bacteria(100);unclassified(58);unclassified(58);unclassified(58);unclassified(58);unclassified(58);	0	0	7	0	0	0	0	0	0	0	0
Otu000295	Bacteria(100);Firmicutes(100);Clostridia(100);Clostridiales(100);Ruminococcaceae(100);Ruminococcus(100);	0	0	0	25	0	2	0	6	0	4	3
Otu000296	Bacteria(100);Firmicutes(100);Clostridia(100);Clostridiales(100);Lachnospiraceae(100);unclassified(99);	2	1	2	1	0	0	3	0	1	1	2
Otu000297	Bacteria(100);unclassified(97);unclassified(97);unclassified(97);unclassified(97);unclassified(97);	0	0	0	0	0	0	3	0	17	0	0
Otu000298	Bacteria(100);Bacteroidetes(100);Bacteroidia(100);Bacteroidales(100);Bacteroidaceae(96);Bacteroides(96);	1	0	0	0	0	0	0	0	0	0	0
Otu000299	Bacteria(100);unclassified(86);unclassified(86);unclassified(86);unclassified(86);unclassified(86);	2	0	0	0	0	0	0	0	0	0	0
Otu000300	Bacteria(100);Bacteroidetes(100);Bacteroidia(100);Bacteroidales(100);Rikenellaceae(100);Alistipes(100);	0	0	11	0	0	0	0	0	0	0	0
Otu000302	Bacteria(100);Firmicutes(100);Clostridia(100);Clostridiales(100);Lachnospiraceae(100);unclassified(100);	13	0	0	0	0	0	0	0	0	0	0
Otu000303	Bacteria(100);Firmicutes(100);Clostridia(100);Clostridiales(100);Ruminococcaceae(100);Anaerotruncus(100);	3	0	0	0	0	5	2	3	0	7	4
Otu000304	Bacteria(100);Bacteroidetes(100);Bacteroidia(100);Bacteroidales(100);Bacteroidaceae(100);Bacteroides(100);	0	0	3	0	0	0	0	0	0	0	0
Otu000305	Bacteria(100);Bacteroidetes(100);Bacteroidia(100);Bacteroidales(100);Rikenellaceae(100);RC9_gut_group(100);	0	0	0	0	0	11	0	5	0	1	4
Otu000306	Bacteria(100);Firmicutes(100);Clostridia(100);Clostridiales(100);Ruminococcaceae(100);Intestinimonas(100);	0	0	0	0	19	0	0	0	0	0	0
Otu000307	Bacteria(100);Actinobacteria(100);Coriobacteriia(100);Coriobacteriales(100);Coriobacteriaceae(100);Enterorhabdus(100);	0	0	22	0	0	0	0	0	0	0	0
Otu000308	Bacteria(100);Firmicutes(100);Clostridia(100);Clostridiales(100);Ruminococcaceae(100);unclassified(100);	3	0	0	0	0	0	11	0	0	0	0
Otu000309	Bacteria(100);unclassified(100);unclassified(100);unclassified(100);unclassified(100);unclassified(100);	0	0	0	0	0	2	1	2	1	0	0
Otu000310	Bacteria(100);Bacteroidetes(100);Bacteroidia(83);Bacteroidales(83);unclassified(83);unclassified(83);	0	0	0	0	0	0	4	0	4	0	0
Otu000311	Bacteria(100);Firmicutes(100);Clostridia(100);Clostridiales(100);Lachnospiraceae(100);unclassified(100);	0	0	0	0	0	4	4	5	5	0	0
Otu000313	Bacteria(100);Firmicutes(100);Clostridia(100);Clostridiales(100);Christensenellaceae(100);unclassified(100);	0	0	0	1	3	1	0	1	0	1	1
Otu000314	Bacteria(100);Firmicutes(100);Erysipelotrichia(100);Erysipelotrichales(100);Erysipelotrichaceae(100);Solobacterium(100);	0	0	0	0	0	0	4	0	5	0	0
Otu000315	Bacteria(100);Firmicutes(100);Clostridia(100);Clostridiales(100);Lachnospiraceae(100);Incertae_Sedis(96);	0	0	0	0	0	1	0	1	0	0	1
Otu000316	Bacteria(100);Firmicutes(100);Clostridia(100);Clostridiales(100);Ruminococcaceae(100);unclassified(74);	0	1	0	0	0	0	0	0	0	2	0
Otu000317	Bacteria(100);Firmicutes(100);Negativicutes(100);Selenomonadales(100);Veillonellaceae(100);Allisonella(100);	0	0	2	5	0	0	0	0	0	0	0
Otu000319	Bacteria(100);Bacteroidetes(100);Bacteroidia(100);Bacteroidales(100);Bacteroidaceae(100);Bacteroides(100);	0	0	0	0	0	17	0	0	0	1	4
Otu000320	Bacteria(100);Firmicutes(100);Clostridia(100);Clostridiales(100);Ruminococcaceae(100);Hydrogenoanaerobacterium(100);	0	0	0	0	0	1	0	0	0	0	0
Otu000322	Bacteria(100);Firmicutes(100);Clostridia(100);Clostridiales(100);Ruminococcaceae(100);unclassified(70);	2	0	0	0	0	2	2	5	7	1	1
Otu000323	Bacteria(100);Proteobacteria(100);Betaproteobacteria(100);Burkholderiales(100);Alcaligenaceae(100);Sutterella(100);	0	0	0	0	0	2	0	0	0	0	0
Otu000324	Bacteria(100);Firmicutes(100);Clostridia(100);Clostridiales(99);unclassified(99);unclassified(99);	3	2	0	0	0	0	8	0	5	1	4
Otu000325	Bacteria(100);Firmicutes(100);Clostridia(100);Clostridiales(100);Christensenellaceae(100);unclassified(100);	3	0	0	0	0	0	0	0	0	0	0
Otu000326	Bacteria(100);Firmicutes(100);Clostridia(100);Clostridiales(100);Christensenellaceae(100);unclassified(100);	0	3	3	0	0	0	2	0	1	0	1
Otu000327	Bacteria(100);Firmicutes(100);Clostridia(100);Clostridiales(100);Lachnospiraceae(100);Incertae_Sedis(79);	9	0	0	0	0	0	0	0	0	0	0
Otu000328	Bacteria(100);Bacteroidetes(100);Bacteroidia(100);Bacteroidales(100);Porphyromonadaceae(100);Butyricimonas(100);	0	0	0	0	0	0	0	2	0	0	0
Otu000330	Bacteria(100);Firmicutes(100);Clostridia(100);Clostridiales(100);Ruminococcaceae(100);unclassified(100);	0	0	0	0	0	0	1	0	8	0	0
Otu000331	Bacteria(100);Firmicutes(100);Clostridia(100);Clostridiales(100);Family_XIII(100);Incertae_Sedis(100);	6	0	0	0	0	0	0	0	0	0	0
Otu000333	Bacteria(100);unclassified(67);unclassified(67);unclassified(67);unclassified(67);unclassified(67);	1	0	0	4	0	2	0	3	2	0	1
Otu000334	Bacteria(100);Bacteroidetes(100);Bacteroidia(100);Bacteroidales(100);Bacteroidaceae(100);Bacteroides(100);	0	0	0	4	0	0	0	0	0	0	0
Otu000335	Bacteria(100);Firmicutes(100);Clostridia(100);Clostridiales(100);Ruminococcaceae(100);Oscillospira(82);	2	0	0	0	0	1	0	1	0	1	0
Otu000336	Bacteria(100);Firmicutes(100);Clostridia(100);Clostridiales(100);Lachnospiraceae(100);Howardella(100);	2	0	0	0	0	0	0	0	0	0	0
Otu000337	Bacteria(100);Firmicutes(100);Clostridia(100);Clostridiales(100);Lachnospiraceae(100);unclassified(91);	0	5	3	0	2	2	1	0	0	1	2
Otu000338	Bacteria(100);Firmicutes(100);Clostridia(100);Clostridiales(100);Christensenellaceae(100);Christensenella(100);	2	0	0	0	0	0	1	4	1	2	1
Otu000340	Bacteria(100);Firmicutes(100);Clostridia(100);Clostridiales(100);Ruminococcaceae(100);unclassified(79);	9	0	0	0	0	0	0	0	0	0	0
Otu000341	Bacteria(100);Firmicutes(100);Clostridia(100);Clostridiales(100);Ruminococcaceae(100);Incertae_Sedis(70);	1	1	3	0	0	0	0	0	0	0	0
Otu000342	Bacteria(100);Bacteroidetes(100);Bacteroidia(100);Bacteroidales(100);unclassified(93);unclassified(93);	17	0	0	0	0	0	0	0	0	0	0
Otu000343	Bacteria(100);Firmicutes(100);Clostridia(100);Clostridiales(100);Ruminococcaceae(100);Incertae_Sedis(100);	0	0	1	2	0	1	0	0	0	0	0
Otu000344	Bacteria(100);Lentisphaerae(100);Lentisphaeria(100);Victivallales(100);Victivallaceae(100);Victivallis(100);	1	0	0	0	0	0	1	0	0	0	0
Otu000345	Bacteria(100);Firmicutes(100);Clostridia(100);Clostridiales(100);Ruminococcaceae(100);Ruminococcus(100);	0	0	0	0	0	0	0	0	1	0	0
Otu000346	Bacteria(100);Elusimicrobia(100);Elusimicrobia(100);Elusimicrobiales(100);Elusimicrobiaceae(100);Elusimicrobium(100);	6	0	0	0	0	0	0	0	0	0	0
Otu000347	Bacteria(100);Firmicutes(100);Clostridia(100);Clostridiales(100);Lachnospiraceae(100);Incertae_Sedis(59);	0	0	0	0	0	0	0	2	0	0	0
Otu000348	Bacteria(100);Firmicutes(100);Clostridia(100);Clostridiales(100);Ruminococcaceae(100);unclassified(100);	0	0	0	0	0	1	0	0	0	1	1
Otu000350	Bacteria(100);Firmicutes(100);Clostridia(100);Clostridiales(100);Lachnospiraceae(100);unclassified(98);	0	0	0	3	10	0	0	0	0	2	2
Otu000351	Bacteria(100);Firmicutes(100);Clostridia(100);Clostridiales(100);Lachnospiraceae(100);unclassified(82);	1	2	1	0	1	1	6	0	1	0	0
Otu000352	Bacteria(100);Firmicutes(100);Clostridia(100);Clostridiales(100);Christensenellaceae(100);unclassified(100);	0	0	0	2	0	0	0	0	0	0	0
Otu000353	Bacteria(100);Firmicutes(100);Clostridia(99);Clostridiales(99);Ruminococcaceae(99);Incertae_Sedis(96);	0	0	0	0	0	0	1	0	5	0	0
Otu000354	Bacteria(100);Firmicutes(100);Clostridia(100);Clostridiales(100);Christensenellaceae(100);unclassified(100);	6	0	0	0	0	0	0	0	0	0	0
Otu000356	Bacteria(100);Firmicutes(100);Clostridia(100);Thermoanaerobacterales(100);Thermoanaerobacteraceae(100);Gelria(100);	0	0	0	0	0	1	0	1	0	0	1
Otu000357	Bacteria(100);unclassified(99);unclassified(99);unclassified(99);unclassified(99);unclassified(99);	0	0	0	0	0	0	0	1	0	0	0
Otu000358	Bacteria(100);unclassified(100);unclassified(100);unclassified(100);unclassified(100);unclassified(100);	5	0	0	0	0	0	0	2	0	0	0
Otu000359	Bacteria(100);Firmicutes(100);Erysipelotrichia(100);Erysipelotrichales(100);Erysipelotrichaceae(100);Coprobacillus(100);	0	0	0	0	0	0	1	0	1	0	0
Otu000360	Bacteria(100);Bacteroidetes(100);Bacteroidia(100);Bacteroidales(100);Prevotellaceae(100);Prevotella(99);	4	0	1	0	0	0	0	0	0	0	0
Otu000361	Bacteria(100);Firmicutes(100);Clostridia(100);Clostridiales(100);Lachnospiraceae(100);unclassified(77);	1	0	0	2	0	4	1	8	2	4	2
Otu000362	Bacteria(100);Bacteroidetes(100);Bacteroidia(100);Bacteroidales(100);Rikenellaceae(100);Alistipes(100);	0	1	0	0	0	3	0	6	0	0	1
Otu000363	Bacteria(100);Firmicutes(100);Clostridia(100);Clostridiales(100);Christensenellaceae(100);unclassified(100);	4	0	0	0	0	0	0	1	0	0	4
Otu000364	Bacteria(100);Firmicutes(100);Clostridia(100);Clostridiales(100);Ruminococcaceae(100);Anaerotruncus(98);	0	0	2	1	0	1	0	3	1	1	1
Otu000365	Bacteria(100);Lentisphaerae(100);Lentisphaeria(100);Victivallales(100);Victivallaceae(100);Victivallis(100);	0	0	0	0	0	1	0	2	0	0	0
Otu000367	Bacteria(100);Firmicutes(100);Clostridia(100);Clostridiales(100);vadinBB60(100);unclassified(100);	0	0	0	0	0	0	0	0	5	0	0
Otu000368	Bacteria(100);Tenericutes(100);Mollicutes(100);RF9(100);unclassified(100);unclassified(100);	0	0	0	0	0	0	5	0	2	0	0
Otu000369	Bacteria(100);Firmicutes(100);Clostridia(100);Clostridiales(100);Lachnospiraceae(100);Coprococcus(100);	1	1	0	1	0	2	0	3	1	0	2
Otu000370	Bacteria(100);Firmicutes(100);Clostridia(100);Clostridiales(100);Ruminococcaceae(100);unclassified(99);	0	0	0	0	0	0	0	0	4	0	0
Otu000372	Bacteria(100);Proteobacteria(73);unclassified(100);unclassified(100);unclassified(100);unclassified(100);	4	0	0	0	0	0	0	0	0	0	0
Otu000373	Bacteria(100);Firmicutes(100);Clostridia(100);Clostridiales(100);Peptococcaceae(100);Dehalobacterium(100);	0	0	2	0	0	1	2	2	0	0	4
Otu000375	Bacteria(100);Firmicutes(100);Clostridia(100);Clostridiales(100);vadinBB60(100);unclassified(100);	1	0	0	0	0	0	0	0	0	0	0
Otu000376	Bacteria(100);Verrucomicrobia(100);Opitutae(100);unclassified(100);unclassified(100);unclassified(100);	0	0	0	0	0	0	0	0	1	0	0
Otu000377	Bacteria(100);Bacteroidetes(100);Bacteroidia(100);Bacteroidales(100);Rikenellaceae(100);Alistipes(100);	0	0	0	0	0	0	0	1	0	0	0
Otu000379	Bacteria(100);Firmicutes(100);Clostridia(100);Clostridiales(100);Ruminococcaceae(100);Anaerofilum(100);	0	0	0	1	2	0	0	0	0	0	0
Otu000381	Bacteria(100);unclassified(100);unclassified(100);unclassified(100);unclassified(100);unclassified(100);	0	6	0	0	1	1	0	3	0	0	0
Otu000382	Bacteria(100);Tenericutes(100);Mollicutes(100);RF9(100);unclassified(100);unclassified(100);	0	1	0	0	0	2	0	3	0	0	2
Otu000384	Bacteria(100);Firmicutes(100);Clostridia(100);Clostridiales(100);Ruminococcaceae(100);Sporobacter(65);	0	0	5	0	1	0	1	0	2	0	2
Otu000385	Bacteria(100);Firmicutes(86);Clostridia(83);Clostridiales(83);vadinBB60(62);unclassified(62);	0	0	0	1	0	1	0	0	0	0	0
Otu000387	Bacteria(100);Bacteroidetes(100);Bacteroidia(100);Bacteroidales(100);Bacteroidaceae(100);Bacteroides(100);	1	0	1	5	0	0	0	0	0	0	0
Otu000390	Bacteria(100);Firmicutes(100);Clostridia(100);Clostridiales(100);Lachnospiraceae(100);unclassified(83);	0	0	0	0	0	4	0	8	0	7	3
Otu000392	Bacteria(100);Bacteroidetes(100);Bacteroidia(100);Bacteroidales(100);Rikenellaceae(100);Alistipes(100);	0	0	0	0	5	0	0	0	0	0	1
Otu000393	Bacteria(100);Firmicutes(100);Clostridia(100);Clostridiales(100);Family_XIII(79);unclassified(79);	0	0	0	10	7	0	0	0	0	0	0
Otu000394	Bacteria(100);Firmicutes(100);Erysipelotrichia(100);Erysipelotrichales(100);Erysipelotrichaceae(100);Solobacterium(100);	3	0	0	0	0	0	0	0	0	0	0
Otu000395	Bacteria(100);Firmicutes(100);Clostridia(100);Clostridiales(100);Christensenellaceae(100);Christensenella(100);	0	0	4	0	0	0	0	0	0	0	0
Otu000396	Bacteria(100);Firmicutes(100);Clostridia(100);Clostridiales(100);Lachnospiraceae(100);unclassified(100);	0	0	0	2	0	2	0	0	0	1	0
Otu000399	Bacteria(100);Firmicutes(100);Erysipelotrichia(100);Erysipelotrichales(100);Erysipelotrichaceae(100);Incertae_Sedis(100);	0	0	2	0	0	0	0	0	0	0	0
Otu000400	Bacteria(100);Firmicutes(100);Clostridia(100);Clostridiales(100);Family_XI(100);Finegoldia(100);	0	0	0	1	0	0	0	0	0	0	0
Otu000401	Bacteria(100);Firmicutes(100);Clostridia(100);Clostridiales(100);Clostridiaceae_1(100);unclassified(80);	0	0	0	0	0	0	0	0	0	0	1
Otu000402	Bacteria(100);Firmicutes(100);Erysipelotrichia(100);Erysipelotrichales(100);Erysipelotrichaceae(100);Incertae_Sedis(100);	0	0	0	0	0	0	2	0	0	0	0
Otu000403	Bacteria(100);Actinobacteria(100);Coriobacteriia(100);Coriobacteriales(100);Coriobacteriaceae(100);unclassified(100);	0	0	0	1	0	0	0	0	0	0	0
Otu000404	Bacteria(100);Firmicutes(100);Clostridia(100);Clostridiales(100);Christensenellaceae(100);Christensenella(100);	0	0	0	3	0	0	0	0	0	0	0
Otu000405	Bacteria(100);unclassified(100);unclassified(100);unclassified(100);unclassified(100);unclassified(100);	0	0	0	0	2	3	0	1	0	1	2
Otu000406	Bacteria(100);Firmicutes(100);Clostridia(100);Clostridiales(100);Lachnospiraceae(100);unclassified(75);	1	0	0	0	0	4	0	2	0	2	5
Otu000407	Bacteria(100);Bacteroidetes(100);Bacteroidia(100);Bacteroidales(100);unclassified(100);unclassified(100);	0	3	0	0	0	3	0	9	0	0	1
Otu000408	Bacteria(100);Tenericutes(100);Mollicutes(100);RF9(100);unclassified(100);unclassified(100);	0	1	0	0	0	1	0	2	0	0	1
Otu000409	Bacteria(100);Firmicutes(100);Clostridia(100);Clostridiales(100);Defluviitaleaceae(100);Incertae_Sedis(59);	2	0	1	4	1	0	0	0	0	0	0
Otu000411	Bacteria(100);Firmicutes(100);Clostridia(100);Clostridiales(100);vadinBB60(100);unclassified(100);	1	0	0	0	0	0	0	0	0	0	0
Otu000412	Bacteria(100);Bacteroidetes(100);Bacteroidia(100);Bacteroidales(100);Porphyromonadaceae(100);Butyricimonas(100);	0	0	1	0	1	0	0	0	0	0	0
Otu000413	Bacteria(100);Firmicutes(100);Clostridia(100);Clostridiales(100);Lachnospiraceae(100);unclassified(97);	1	0	0	0	0	2	0	4	0	3	0
Otu000414	Bacteria(100);unclassified(96);unclassified(96);unclassified(96);unclassified(96);unclassified(96);	2	0	0	0	0	0	0	0	0	0	0
Otu000415	Bacteria(100);Firmicutes(100);Clostridia(100);Clostridiales(99);Ruminococcaceae(96);unclassified(96);	1	2	0	0	0	1	0	0	0	0	1
Otu000416	Bacteria(100);Firmicutes(100);Clostridia(100);Clostridiales(100);Ruminococcaceae(100);Anaerotruncus(100);	1	0	0	0	0	2	0	0	0	0	1
Otu000417	Bacteria(100);Firmicutes(100);Clostridia(100);Clostridiales(100);Lachnospiraceae(100);unclassified(100);	0	0	0	0	4	1	0	2	0	6	6
Otu000418	Bacteria(100);Firmicutes(100);Clostridia(100);Clostridiales(100);Ruminococcaceae(100);unclassified(100);	1	0	0	1	0	0	0	0	3	1	1
Otu000419	Bacteria(100);Firmicutes(100);Clostridia(100);Clostridiales(100);Ruminococcaceae(100);unclassified(100);	0	0	0	0	1	0	0	0	0	0	0
Otu000420	Bacteria(100);Firmicutes(100);Clostridia(100);Clostridiales(100);Ruminococcaceae(100);unclassified(95);	3	0	0	0	0	0	2	0	0	0	0
Otu000421	Bacteria(100);Firmicutes(100);Clostridia(100);Clostridiales(100);Lachnospiraceae(100);unclassified(62);	2	1	0	0	0	3	0	2	0	1	0
Otu000423	Bacteria(100);Firmicutes(100);Clostridia(100);Clostridiales(100);Family_XIII(55);unclassified(100);	2	0	0	0	5	0	1	2	1	1	0
Otu000424	Bacteria(100);Firmicutes(100);Clostridia(100);Clostridiales(100);Christensenellaceae(100);unclassified(100);	2	3	0	0	0	0	0	0	0	0	1
Otu000425	Bacteria(100);Firmicutes(100);Clostridia(100);Clostridiales(100);Ruminococcaceae(100);Incertae_Sedis(100);	0	0	1	3	2	0	0	0	0	0	0
Otu000426	Bacteria(100);Firmicutes(97);Clostridia(93);Clostridiales(93);unclassified(76);unclassified(76);	0	1	0	0	0	0	2	0	0	1	0
Otu000427	Bacteria(100);Actinobacteria(100);Coriobacteriia(100);Coriobacteriales(100);Coriobacteriaceae(100);Slackia(100);	0	0	0	0	5	0	0	0	0	0	0
Otu000428	Bacteria(100);Actinobacteria(100);Coriobacteriia(100);Coriobacteriales(100);Coriobacteriaceae(100);Collinsella(100);	0	2	0	0	0	0	0	0	1	0	0
Otu000429	Bacteria(100);unclassified(100);unclassified(100);unclassified(100);unclassified(100);unclassified(100);	0	0	0	0	0	0	0	0	5	0	0
Otu000430	Bacteria(100);Firmicutes(100);Clostridia(100);Clostridiales(100);Defluviitaleaceae(99);Incertae_Sedis(99);	0	0	0	0	0	2	1	4	1	0	1
Otu000431	Bacteria(100);Firmicutes(97);Clostridia(84);Clostridiales(63);unclassified(63);unclassified(63);	1	0	0	0	3	0	0	0	0	2	0
Otu000432	Bacteria(100);Firmicutes(100);Clostridia(100);Clostridiales(100);Lachnospiraceae(100);possible_genus_Sk018(54);	1	0	1	0	0	0	2	2	1	0	0
Otu000433	Bacteria(100);Firmicutes(100);Clostridia(100);Clostridiales(100);Lachnospiraceae(100);unclassified(95);	0	1	2	0	0	1	0	1	0	0	0
Otu000434	Bacteria(100);Firmicutes(100);Clostridia(100);Clostridiales(100);Lachnospiraceae(100);unclassified(97);	0	3	0	0	0	0	0	0	0	0	1
Otu000437	Bacteria(100);Firmicutes(100);unclassified(89);unclassified(89);unclassified(89);unclassified(89);	0	0	0	2	0	0	0	0	0	0	0
Otu000438	Bacteria(100);Firmicutes(100);Clostridia(100);Clostridiales(100);Christensenellaceae(100);unclassified(100);	0	0	0	0	0	0	0	0	1	0	0
Otu000439	Bacteria(100);Firmicutes(100);Clostridia(100);Clostridiales(100);Ruminococcaceae(66);Incertae_Sedis(56);	0	0	0	0	0	3	0	0	1	0	1
Otu000440	Bacteria(100);Firmicutes(100);Clostridia(100);Clostridiales(100);Ruminococcaceae(96);Incertae_Sedis(52);	0	0	0	0	0	0	0	0	1	0	0
Otu000441	Bacteria(100);Firmicutes(100);Clostridia(100);Clostridiales(100);Lachnospiraceae(100);unclassified(74);	0	2	0	1	2	0	0	0	0	1	0
Otu000442	Bacteria(100);Firmicutes(100);Clostridia(100);Clostridiales(100);Ruminococcaceae(100);Sporobacter(100);	1	1	0	0	0	0	0	0	0	1	0
Otu000444	Bacteria(100);Firmicutes(100);Clostridia(100);Clostridiales(100);Ruminococcaceae(100);Incertae_Sedis(90);	0	6	0	0	3	0	0	0	0	0	0
Otu000445	Bacteria(100);Bacteroidetes(100);Bacteroidia(100);Bacteroidales(100);Bacteroidaceae(100);Bacteroides(100);	0	0	0	0	9	0	0	0	0	0	0
Otu000446	Bacteria(100);Tenericutes(100);Mollicutes(100);RF9(100);unclassified(100);unclassified(100);	0	0	0	0	0	0	4	0	0	0	0
Otu000447	Bacteria(100);Firmicutes(100);Clostridia(100);Clostridiales(100);Ruminococcaceae(100);Incertae_Sedis(100);	0	0	0	0	0	2	0	2	0	0	0
Otu000448	Bacteria(100);Firmicutes(100);Clostridia(100);Clostridiales(100);Ruminococcaceae(100);Incertae_Sedis(98);	3	0	0	0	0	0	0	0	0	0	0
Otu000449	Bacteria(100);Firmicutes(100);Clostridia(100);Clostridiales(100);Christensenellaceae(100);Christensenella(100);	0	1	0	0	0	1	0	0	0	0	0
Otu000450	Bacteria(100);Firmicutes(100);Clostridia(100);Clostridiales(100);Ruminococcaceae(100);unclassified(100);	0	0	0	0	0	0	0	2	0	1	7
Otu000451	Bacteria(100);Firmicutes(86);Clostridia(86);unclassified(64);unclassified(64);unclassified(64);	0	0	1	0	0	0	0	0	0	0	0
Otu000452	Bacteria(100);Firmicutes(100);Erysipelotrichia(100);Erysipelotrichales(100);Erysipelotrichaceae(100);Asteroleplasma(100);	0	0	0	0	0	2	0	1	0	0	0
Otu000453	Bacteria(100);Firmicutes(100);Clostridia(100);Clostridiales(100);Family_XIII(100);Incertae_Sedis(100);	0	0	0	0	0	0	0	0	0	1	3
Otu000454	Bacteria(100);Firmicutes(100);Bacilli(100);Lactobacillales(100);Lactobacillaceae(100);Lactobacillus(100);	0	0	0	0	0	0	0	0	1	0	0
Otu000455	Bacteria(100);Firmicutes(100);Clostridia(100);Clostridiales(100);Lachnospiraceae(100);Incertae_Sedis(83);	0	2	0	0	0	0	0	1	0	1	0
Otu000456	Bacteria(100);Actinobacteria(100);Actinobacteria(100);Actinomycetales(100);Actinomycetaceae(100);Actinomyces(100);	0	0	0	2	2	0	0	0	0	0	0
Otu000457	Bacteria(100);Cyanobacteria(100);Melainabacteria(100);Gastranaerophilales(100);unclassified(100);unclassified(100);	1	0	0	0	0	0	0	0	0	0	0
Otu000458	Bacteria(100);Bacteroidetes(100);Bacteroidia(100);Bacteroidales(100);Bacteroidaceae(100);Bacteroides(100);	0	0	0	0	0	0	0	1	0	0	0
Otu000460	Bacteria(100);Tenericutes(100);Mollicutes(100);RF9(100);unclassified(100);unclassified(100);	0	0	0	0	0	3	0	1	0	1	1
Otu000461	Bacteria(100);Firmicutes(100);Clostridia(100);Clostridiales(100);Lachnospiraceae(100);unclassified(96);	2	0	0	0	0	1	0	0	3	0	0
Otu000464	Bacteria(100);Firmicutes(100);Clostridia(100);Clostridiales(100);Ruminococcaceae(100);unclassified(100);	0	0	0	3	0	1	0	0	0	0	0
Otu000466	Bacteria(100);Proteobacteria(100);Alphaproteobacteria(100);Rhodospirillales(100);Rhodospirillaceae(100);Thalassospira(100);	0	0	0	4	0	0	0	0	0	0	0
Otu000467	Bacteria(100);Firmicutes(100);Clostridia(100);Clostridiales(100);Ruminococcaceae(100);Incertae_Sedis(79);	0	5	0	0	0	0	0	0	0	0	1
Otu000468	Bacteria(100);Firmicutes(100);Clostridia(100);Clostridiales(100);Ruminococcaceae(100);Anaerofilum(100);	0	0	1	0	0	0	0	0	0	2	0
Otu000469	Bacteria(100);Firmicutes(100);Erysipelotrichia(100);Erysipelotrichales(100);Erysipelotrichaceae(100);unclassified(100);	1	0	0	0	0	0	0	0	0	0	0
Otu000472	Bacteria(100);Firmicutes(100);Clostridia(100);Clostridiales(100);Ruminococcaceae(100);unclassified(100);	5	0	0	0	0	0	0	0	0	0	0
Otu000473	Bacteria(100);Firmicutes(100);Clostridia(100);Clostridiales(95);Ruminococcaceae(85);unclassified(85);	0	0	0	0	0	0	0	0	2	0	0
Otu000474	Bacteria(100);Firmicutes(100);Clostridia(100);Clostridiales(100);Christensenellaceae(100);unclassified(100);	0	0	0	0	1	1	0	0	0	0	0
Otu000476	Bacteria(100);Tenericutes(100);Mollicutes(100);Anaeroplasmatales(100);Anaeroplasmataceae(100);Anaeroplasma(100);	1	0	0	0	0	0	0	0	0	0	0
Otu000477	Bacteria(100);Lentisphaerae(100);Lentisphaeria(100);Victivallales(100);Victivallaceae(100);Victivallis(100);	0	0	0	0	0	1	0	0	0	0	0
Otu000479	Bacteria(100);Firmicutes(100);Clostridia(100);Clostridiales(100);Lachnospiraceae(100);Roseburia(57);	0	3	0	0	0	0	1	3	1	0	1
Otu000480	Bacteria(100);Verrucomicrobia(100);Opitutae(100);unclassified(100);unclassified(100);unclassified(100);	0	0	0	0	0	3	0	0	0	0	0
Otu000481	Bacteria(100);unclassified(100);unclassified(100);unclassified(100);unclassified(100);unclassified(100);	4	0	0	0	0	0	0	0	0	0	0
Otu000482	Bacteria(100);Proteobacteria(100);Deltaproteobacteria(100);Desulfovibrionales(100);Desulfovibrionaceae(100);unclassified(95);	0	0	0	0	0	4	0	2	0	0	0
Otu000483	Bacteria(100);Firmicutes(100);Clostridia(100);Clostridiales(100);Ruminococcaceae(100);Incertae_Sedis(100);	0	0	0	1	0	1	0	0	0	0	0
Otu000484	Bacteria(100);unclassified(100);unclassified(100);unclassified(100);unclassified(100);unclassified(100);	0	0	0	0	7	0	0	0	0	0	0
Otu000485	Bacteria(100);Firmicutes(100);Clostridia(100);Clostridiales(100);Ruminococcaceae(100);Incertae_Sedis(74);	0	1	0	0	0	0	0	0	0	0	0
Otu000486	Bacteria(100);Firmicutes(100);Negativicutes(100);Selenomonadales(100);Veillonellaceae(100);Veillonella(100);	1	1	0	3	0	1	2	1	0	1	1
Otu000488	Bacteria(100);Firmicutes(65);Clostridia(63);Clostridiales(63);unclassified(63);unclassified(63);	0	0	2	0	0	0	0	0	0	0	0
Otu000489	Bacteria(100);Firmicutes(100);Clostridia(100);Clostridiales(100);Lachnospiraceae(100);Coprococcus(98);	0	0	0	1	0	0	0	0	0	0	0
Otu000490	Bacteria(100);Firmicutes(100);Clostridia(100);Clostridiales(100);Ruminococcaceae(100);unclassified(98);	0	0	0	0	0	1	2	0	0	0	0
Otu000491	Bacteria(100);Firmicutes(100);Clostridia(100);Clostridiales(100);vadinBB60(100);unclassified(100);	0	0	1	0	0	2	0	3	0	0	0
Otu000492	Bacteria(100);Firmicutes(100);Clostridia(100);Clostridiales(100);Defluviitaleaceae(100);Incertae_Sedis(100);	5	0	0	0	0	0	0	0	0	0	0
Otu000493	Bacteria(100);unclassified(100);unclassified(100);unclassified(100);unclassified(100);unclassified(100);	0	0	0	0	0	0	0	3	0	0	0
Otu000495	Bacteria(100);Firmicutes(100);Clostridia(100);Clostridiales(100);Ruminococcaceae(100);unclassified(100);	0	0	0	0	0	0	0	1	0	0	0
Otu000496	Bacteria(100);Firmicutes(100);Clostridia(100);Clostridiales(100);Ruminococcaceae(100);unclassified(86);	0	0	0	0	0	0	2	0	1	0	0
Otu000497	Bacteria(100);Firmicutes(100);Clostridia(100);Clostridiales(100);Ruminococcaceae(100);Anaerotruncus(100);	0	0	0	0	0	0	0	0	0	0	1
Otu000498	Bacteria(100);unclassified(100);unclassified(100);unclassified(100);unclassified(100);unclassified(100);	0	0	0	0	0	0	2	1	1	0	0
Otu000500	Bacteria(100);Firmicutes(97);unclassified(55);unclassified(55);unclassified(55);unclassified(55);	2	0	0	1	0	1	1	0	1	0	0
Otu000502	Bacteria(100);Proteobacteria(100);unclassified(94);unclassified(94);unclassified(94);unclassified(94);	0	0	0	0	0	1	0	2	0	0	0
Otu000503	Bacteria(100);Tenericutes(100);Mollicutes(100);RF9(100);unclassified(100);unclassified(100);	0	0	0	0	0	1	0	0	0	0	0
Otu000504	Bacteria(100);Firmicutes(100);Clostridia(100);Clostridiales(100);Peptococcaceae(100);Peptococcus(100);	0	0	1	0	0	0	0	0	0	0	0
Otu000505	Bacteria(100);Proteobacteria(100);Gammaproteobacteria(100);Pasteurellales(100);Pasteurellaceae(100);Haemophilus(54);	0	0	0	0	1	0	0	0	0	0	5
Otu000506	Bacteria(100);Firmicutes(100);Clostridia(100);Clostridiales(100);Lachnospiraceae(100);unclassified(100);	0	0	3	1	0	0	0	0	0	0	0
Otu000507	Bacteria(100);Firmicutes(100);Clostridia(100);Clostridiales(100);Ruminococcaceae(100);Anaerofilum(100);	0	0	0	0	2	0	0	0	0	0	0
Otu000508	Bacteria(100);Firmicutes(100);Clostridia(100);Clostridiales(100);Ruminococcaceae(100);Anaerotruncus(100);	0	0	0	0	0	1	0	0	0	0	0
Otu000509	Bacteria(100);Firmicutes(100);Clostridia(100);Clostridiales(100);Ruminococcaceae(100);Faecalibacterium(100);	2	0	0	0	0	0	1	1	0	0	0
Otu000510	Bacteria(100);Lentisphaerae(100);Lentisphaeria(100);Victivallales(100);Victivallaceae(100);Victivallis(100);	0	0	0	0	0	2	0	0	0	0	0
Otu000511	Bacteria(100);Tenericutes(100);Mollicutes(100);RF9(100);unclassified(100);unclassified(100);	2	0	0	0	0	0	0	0	0	0	0
Otu000513	Bacteria(100);Firmicutes(100);Clostridia(100);Clostridiales(100);Ruminococcaceae(100);unclassified(100);	0	1	0	0	2	0	0	1	0	1	0
Otu000514	Bacteria(100);unclassified(62);unclassified(62);unclassified(62);unclassified(62);unclassified(62);	0	0	0	0	0	0	1	1	1	0	0
Otu000515	Bacteria(100);Firmicutes(100);Clostridia(100);Clostridiales(100);Ruminococcaceae(100);unclassified(100);	0	0	0	0	0	1	0	0	1	2	0
Otu000516	Bacteria(100);Firmicutes(100);Clostridia(100);Clostridiales(100);Ruminococcaceae(100);Incertae_Sedis(100);	0	1	1	0	1	0	0	1	0	1	1
Otu000517	Bacteria(100);Firmicutes(84);Clostridia(75);Clostridiales(75);unclassified(71);unclassified(71);	0	0	0	0	0	4	0	2	0	0	2
Otu000518	Bacteria(100);Firmicutes(90);Clostridia(77);Clostridiales(57);Ruminococcaceae(57);unclassified(100);	0	0	0	0	0	0	2	0	2	0	0
Otu000521	Bacteria(100);Firmicutes(80);Clostridia(80);Clostridiales(80);Christensenellaceae(80);Christensenella(80);	0	0	1	0	1	0	1	0	0	0	0
Otu000522	Bacteria(100);Firmicutes(100);Clostridia(100);Clostridiales(100);Lachnospiraceae(100);Roseburia(100);	1	0	0	0	0	0	0	0	0	0	0
Otu000524	Bacteria(100);Firmicutes(100);Clostridia(100);Clostridiales(100);Ruminococcaceae(100);unclassified(52);	3	0	0	0	0	0	0	0	0	0	0
Otu000527	Bacteria(100);Firmicutes(100);Clostridia(100);Clostridiales(94);Ruminococcaceae(83);unclassified(83);	0	0	1	0	0	0	0	0	0	0	0
Otu000528	Bacteria(100);Firmicutes(100);Clostridia(100);Clostridiales(100);Ruminococcaceae(100);Faecalibacterium(100);	0	0	0	0	0	0	0	0	0	2	0
Otu000529	Bacteria(100);Firmicutes(100);Clostridia(100);Clostridiales(100);Ruminococcaceae(100);Incertae_Sedis(94);	0	0	0	0	0	1	0	0	0	0	0
Otu000531	Bacteria(100);Bacteroidetes(100);Bacteroidia(100);Bacteroidales(100);Porphyromonadaceae(100);Butyricimonas(100);	0	0	2	0	0	0	0	0	0	0	0
Otu000532	Bacteria(100);unclassified(100);unclassified(100);unclassified(100);unclassified(100);unclassified(100);	3	0	0	0	0	1	0	1	0	0	0
Otu000533	Bacteria(100);Firmicutes(97);Clostridia(97);Clostridiales(97);Christensenellaceae(72);unclassified(72);	0	1	0	0	0	1	0	0	0	0	0
Otu000535	Bacteria(100);Cyanobacteria(100);Melainabacteria(100);Gastranaerophilales(100);unclassified(100);unclassified(100);	1	0	0	0	0	0	0	0	0	0	0
Otu000537	Bacteria(100);Bacteroidetes(100);Bacteroidia(100);Bacteroidales(100);Porphyromonadaceae(100);Barnesiella(100);	0	0	1	0	0	0	0	0	0	0	0
Otu000539	Bacteria(100);Firmicutes(100);Clostridia(100);Clostridiales(100);Ruminococcaceae(100);unclassified(100);	0	2	0	0	0	1	0	1	0	0	0
Otu000540	Bacteria(100);Firmicutes(100);Clostridia(100);Clostridiales(100);Lachnospiraceae(100);unclassified(100);	0	0	0	0	1	0	0	3	0	2	1
Otu000541	Bacteria(100);unclassified(81);unclassified(81);unclassified(81);unclassified(81);unclassified(81);	1	0	0	0	0	0	1	0	0	0	0
Otu000542	Bacteria(100);Firmicutes(100);Clostridia(100);Clostridiales(100);Ruminococcaceae(100);Anaerotruncus(77);	0	0	0	0	0	0	1	0	0	0	0
Otu000545	Bacteria(100);Firmicutes(100);Bacilli(100);Lactobacillales(100);Lactobacillaceae(100);Lactobacillus(100);	0	0	0	0	0	0	0	0	2	0	0
Otu000546	Bacteria(100);Firmicutes(100);Clostridia(100);Clostridiales(100);Ruminococcaceae(100);Incertae_Sedis(100);	0	0	4	0	0	0	0	0	0	0	0
Otu000549	Bacteria(100);Firmicutes(100);Clostridia(100);Clostridiales(100);Peptococcaceae(100);Dehalobacterium(100);	0	0	1	0	0	0	0	0	2	0	0
Otu000550	Bacteria(100);Firmicutes(100);Clostridia(100);Clostridiales(100);Christensenellaceae(100);Christensenella(100);	0	0	0	0	0	2	0	0	0	0	1
Otu000551	Bacteria(100);Firmicutes(100);Clostridia(100);Clostridiales(100);Ruminococcaceae(100);Intestinimonas(100);	0	0	0	0	0	2	0	0	1	0	0
Otu000552	Bacteria(100);Bacteroidetes(100);Bacteroidia(100);Bacteroidales(100);Bacteroidaceae(100);Bacteroides(100);	0	0	0	1	0	0	1	0	1	0	0
Otu000553	Bacteria(100);unclassified(80);unclassified(80);unclassified(80);unclassified(80);unclassified(80);	0	0	0	0	3	0	0	0	0	0	0
Otu000554	Bacteria(100);Actinobacteria(100);Actinobacteria(100);Micrococcales(100);Micrococcaceae(100);Rothia(100);	1	0	0	0	0	0	0	1	0	0	0
Otu000555	Bacteria(100);Firmicutes(100);Clostridia(100);Clostridiales(100);Lachnospiraceae(76);unclassified(76);	0	0	0	0	0	2	0	1	0	0	0
Otu000558	Bacteria(100);Firmicutes(100);Clostridia(100);Clostridiales(100);Ruminococcaceae(67);unclassified(59);	0	0	0	0	0	0	2	0	1	0	0
Otu000560	Bacteria(100);unclassified(63);unclassified(63);unclassified(63);unclassified(63);unclassified(63);	1	0	0	0	0	0	1	0	1	0	0
Otu000561	Bacteria(100);Firmicutes(100);Clostridia(100);Clostridiales(100);Ruminococcaceae(100);Incertae_Sedis(100);	0	0	0	0	0	0	0	0	1	1	0
Otu000563	Bacteria(100);Firmicutes(100);Clostridia(100);Clostridiales(100);Ruminococcaceae(100);Oscillospira(88);	0	0	0	0	0	1	0	2	0	0	0
Otu000564	Bacteria(100);Candidate_division_TM7(100);unclassified(100);unclassified(100);unclassified(100);unclassified(100);	0	0	0	0	0	0	1	0	1	0	0
Otu000565	Bacteria(100);Firmicutes(100);Clostridia(100);Clostridiales(100);Ruminococcaceae(100);Faecalibacterium(100);	1	0	0	0	0	0	0	0	0	1	0
Otu000566	Bacteria(100);Firmicutes(100);Clostridia(100);Clostridiales(100);Christensenellaceae(100);unclassified(100);	0	0	1	1	0	0	0	0	0	0	0
Otu000573	Bacteria(100);Firmicutes(82);Clostridia(69);unclassified(100);unclassified(100);unclassified(100);	0	1	0	0	0	0	0	0	0	0	1
Otu000576	Bacteria(100);Bacteroidetes(100);Bacteroidia(100);Bacteroidales(100);Prevotellaceae(100);Prevotella(100);	0	0	0	0	0	3	0	4	0	0	2
Otu000579	Bacteria(100);Verrucomicrobia(100);Opitutae(100);unclassified(100);unclassified(100);unclassified(100);	0	0	0	0	0	0	1	0	1	0	0
Otu000580	Bacteria(100);Firmicutes(100);Clostridia(100);Clostridiales(100);Ruminococcaceae(100);Incertae_Sedis(100);	0	0	0	0	0	0	0	0	1	0	0
Otu000581	Bacteria(100);Firmicutes(100);Clostridia(100);Clostridiales(100);Ruminococcaceae(100);unclassified(86);	0	0	3	0	0	0	0	0	0	0	0
Otu000582	Bacteria(100);unclassified(77);unclassified(77);unclassified(77);unclassified(77);unclassified(77);	0	0	1	0	0	1	0	0	0	0	0
Otu000583	Bacteria(100);Firmicutes(100);Clostridia(100);Clostridiales(100);Ruminococcaceae(100);Ruminococcus(100);	1	0	0	0	0	0	0	0	0	0	0
Otu000584	Bacteria(100);Proteobacteria(100);Alphaproteobacteria(100);Sphingomonadales(100);Sphingomonadaceae(100);Sphingomonas(100);	1	0	0	0	0	0	0	0	1	0	0
Otu000585	Bacteria(100);Firmicutes(100);Clostridia(100);Clostridiales(100);Ruminococcaceae(100);unclassified(100);	0	0	0	0	0	0	1	0	0	0	0
Otu000586	Bacteria(100);Firmicutes(100);Negativicutes(100);Selenomonadales(100);Veillonellaceae(100);Dialister(100);	0	1	0	0	0	0	0	0	0	0	0
Otu000587	Bacteria(100);Firmicutes(100);Clostridia(100);Clostridiales(100);Ruminococcaceae(100);unclassified(100);	0	0	2	0	0	1	0	0	0	0	0
Otu000588	Bacteria(100);Bacteroidetes(100);Bacteroidia(100);Bacteroidales(100);unclassified(100);unclassified(100);	0	0	0	0	0	0	0	0	1	0	0
Otu000590	Bacteria(100);Firmicutes(100);Clostridia(100);Clostridiales(100);Lachnospiraceae(100);unclassified(100);	0	0	0	0	0	0	4	0	1	1	0
Otu000592	Bacteria(100);Actinobacteria(100);Coriobacteriia(80);Coriobacteriales(80);Coriobacteriaceae(80);unclassified(80);	0	0	0	0	1	0	0	0	0	0	0
Otu000593	Bacteria(100);Firmicutes(100);Clostridia(100);Clostridiales(100);Ruminococcaceae(100);unclassified(65);	3	0	0	0	0	0	0	0	0	0	0
Otu000594	Bacteria(100);Firmicutes(100);Clostridia(100);Clostridiales(100);Ruminococcaceae(100);unclassified(100);	1	0	0	0	0	0	0	0	0	0	0
Otu000595	Bacteria(100);Tenericutes(100);Mollicutes(100);RF9(100);unclassified(100);unclassified(100);	2	1	0	0	0	0	0	0	0	0	0
Otu000599	Bacteria(100);Firmicutes(100);Bacilli(100);Lactobacillales(100);Lactobacillaceae(100);Lactobacillus(100);	0	0	0	0	1	0	0	0	0	0	0
Otu000600	Bacteria(100);Firmicutes(100);Clostridia(100);Clostridiales(100);Peptococcaceae(100);Dehalobacterium(100);	0	0	0	0	1	0	0	1	0	0	0
Otu000602	Bacteria(100);Firmicutes(100);Clostridia(100);Clostridiales(100);Ruminococcaceae(100);Sporobacter(85);	1	0	0	0	0	0	1	0	0	0	0
Otu000603	Bacteria(100);Bacteroidetes(100);Bacteroidia(100);Bacteroidales(100);Porphyromonadaceae(100);Parabacteroides(100);	0	0	0	0	0	3	0	0	0	0	0
Otu000608	Bacteria(100);unclassified(100);unclassified(100);unclassified(100);unclassified(100);unclassified(100);	0	0	0	0	0	0	0	0	0	0	2
Otu000610	Bacteria(100);Firmicutes(77);unclassified(71);unclassified(71);unclassified(71);unclassified(71);	0	0	0	0	0	0	0	0	0	0	1
Otu000611	Bacteria(100);unclassified(100);unclassified(100);unclassified(100);unclassified(100);unclassified(100);	0	0	1	0	1	0	0	0	0	0	0
Otu000612	Bacteria(100);Bacteroidetes(100);Bacteroidia(100);Bacteroidales(100);Porphyromonadaceae(100);Porphyromonas(100);	1	0	0	3	0	0	0	0	0	0	0
Otu000614	Bacteria(100);Firmicutes(100);Clostridia(100);Clostridiales(100);vadinBB60(100);unclassified(100);	1	0	0	0	0	0	0	0	0	0	0
Otu000619	Bacteria(100);Firmicutes(100);Clostridia(100);Clostridiales(100);Defluviitaleaceae(100);Incertae_Sedis(100);	0	0	0	0	0	0	3	0	1	0	0
Otu000620	Bacteria(100);Firmicutes(100);Clostridia(100);Clostridiales(100);Ruminococcaceae(100);Subdoligranulum(100);	0	0	0	0	0	1	0	1	0	1	0
Otu000623	Bacteria(100);Firmicutes(100);Clostridia(100);Clostridiales(100);Ruminococcaceae(100);unclassified(100);	0	0	0	0	0	1	0	2	0	0	0
Otu000630	Bacteria(100);Firmicutes(100);Erysipelotrichia(100);Erysipelotrichales(100);Erysipelotrichaceae(100);unclassified(100);	0	0	0	0	0	0	0	0	0	1	0
Otu000631	Bacteria(100);Firmicutes(100);Clostridia(100);Clostridiales(100);Ruminococcaceae(100);Anaerotruncus(88);	0	0	0	1	0	0	0	0	0	0	0
Otu000633	Bacteria(100);Firmicutes(100);Clostridia(100);Clostridiales(100);Lachnospiraceae(100);unclassified(100);	4	0	0	0	0	0	0	0	0	0	0
Otu000635	Bacteria(100);Firmicutes(100);Clostridia(100);Clostridiales(100);Lachnospiraceae(100);Roseburia(100);	0	0	0	2	1	0	0	0	0	0	0
Otu000636	Bacteria(100);unclassified(74);unclassified(74);unclassified(74);unclassified(74);unclassified(74);	0	0	1	0	0	0	0	0	0	0	0
Otu000638	Bacteria(100);Firmicutes(100);Clostridia(100);Clostridiales(100);Ruminococcaceae(100);Faecalibacterium(54);	0	0	0	0	0	0	2	0	0	0	0
Otu000639	Bacteria(100);Bacteroidetes(100);Bacteroidia(100);Bacteroidales(100);unclassified(100);unclassified(100);	1	0	0	0	0	0	0	0	0	0	0
Otu000642	Bacteria(100);Bacteroidetes(100);Bacteroidia(100);Bacteroidales(100);Prevotellaceae(100);Paraprevotella(100);	0	0	0	0	0	2	0	0	0	0	0
Otu000644	Bacteria(100);Firmicutes(100);Clostridia(100);Clostridiales(100);Ruminococcaceae(100);unclassified(100);	0	0	0	0	0	2	0	1	0	0	0
Otu000645	Bacteria(100);Tenericutes(100);Mollicutes(100);RF9(100);unclassified(100);unclassified(100);	0	0	0	0	0	1	0	1	0	0	1
Otu000648	Bacteria(100);Firmicutes(100);Clostridia(100);Clostridiales(100);Ruminococcaceae(100);unclassified(100);	0	0	0	1	0	0	0	0	0	0	0
Otu000650	Bacteria(100);Firmicutes(100);Clostridia(100);Clostridiales(100);Ruminococcaceae(74);unclassified(61);	0	0	0	0	0	0	0	1	0	1	0
Otu000651	Bacteria(100);Firmicutes(74);Clostridia(61);Clostridiales(61);unclassified(100);unclassified(100);	0	0	0	0	0	0	0	1	0	0	0
Otu000656	Bacteria(100);Firmicutes(100);Clostridia(100);Clostridiales(100);Ruminococcaceae(79);Incertae_Sedis(58);	0	0	0	0	0	0	1	0	0	0	0
Otu000657	Bacteria(100);Proteobacteria(100);Betaproteobacteria(100);Burkholderiales(100);Alcaligenaceae(100);Sutterella(100);	0	0	0	0	0	0	0	0	0	1	0
Otu000658	Bacteria(100);Firmicutes(100);Clostridia(100);Clostridiales(100);Lachnospiraceae(100);unclassified(79);	0	0	0	0	0	0	1	0	1	0	0
Otu000659	Bacteria(100);Firmicutes(100);Clostridia(100);Clostridiales(100);Ruminococcaceae(86);unclassified(86);	0	0	0	0	0	0	0	1	0	2	0
Otu000662	Bacteria(100);unclassified(93);unclassified(93);unclassified(93);unclassified(93);unclassified(93);	0	0	0	0	0	1	0	1	0	1	0
Otu000668	Bacteria(100);Bacteroidetes(100);Bacteroidia(100);Bacteroidales(100);Prevotellaceae(100);Prevotella(100);	0	0	0	2	0	0	0	0	0	0	0
Otu000670	Bacteria(100);Firmicutes(100);Clostridia(100);Clostridiales(100);Ruminococcaceae(100);unclassified(85);	0	0	0	0	0	0	0	0	0	1	0
Otu000674	Bacteria(100);Firmicutes(100);Clostridia(100);Clostridiales(100);Ruminococcaceae(100);unclassified(93);	0	0	0	0	0	0	0	2	0	1	1
Otu000675	Bacteria(100);Firmicutes(85);Clostridia(85);Clostridiales(85);unclassified(85);unclassified(85);	0	1	0	0	0	0	0	1	0	0	0
Otu000676	Bacteria(100);Firmicutes(100);Bacilli(100);Lactobacillales(100);Leuconostocaceae(100);Leuconostoc(100);	0	0	0	0	2	1	0	0	0	0	0
Otu000681	Bacteria(100);Synergistetes(100);Synergistia(100);Synergistales(100);Synergistaceae(100);Synergistes(100);	0	0	0	0	0	1	0	0	0	0	0
Otu000682	Bacteria(100);Firmicutes(100);Clostridia(100);Clostridiales(100);Ruminococcaceae(100);unclassified(100);	2	0	0	0	0	0	0	0	0	0	0
Otu000687	Bacteria(100);Firmicutes(100);Clostridia(100);Clostridiales(100);Ruminococcaceae(100);Intestinimonas(93);	0	0	1	0	0	0	0	0	0	0	0
Otu000688	Bacteria(100);Firmicutes(100);Clostridia(100);Clostridiales(100);Ruminococcaceae(100);Anaerotruncus(100);	0	0	0	0	0	0	1	0	2	0	0
Otu000689	Bacteria(100);Firmicutes(100);Clostridia(100);Clostridiales(100);Christensenellaceae(100);unclassified(100);	0	0	0	0	0	0	0	1	0	0	0
Otu000690	Bacteria(100);Actinobacteria(100);Coriobacteriia(100);Coriobacteriales(100);Coriobacteriaceae(100);Slackia(100);	0	0	0	0	0	0	0	1	0	0	0
Otu000691	Bacteria(100);Firmicutes(100);Clostridia(100);Clostridiales(100);Ruminococcaceae(100);unclassified(100);	0	0	1	0	0	0	0	0	0	0	0
Otu000694	Bacteria(100);Firmicutes(100);Clostridia(100);Clostridiales(100);Ruminococcaceae(100);unclassified(100);	0	0	0	0	0	5	0	0	0	2	0
Otu000699	Bacteria(100);Firmicutes(100);Clostridia(100);Clostridiales(100);Ruminococcaceae(100);Incertae_Sedis(59);	0	1	0	0	0	1	0	0	0	2	0
Otu000700	Bacteria(100);Firmicutes(100);Clostridia(100);Clostridiales(100);Ruminococcaceae(100);Ruminococcus(100);	0	0	0	0	0	2	0	0	0	0	0
Otu000702	Bacteria(100);Firmicutes(100);Clostridia(100);Clostridiales(100);Ruminococcaceae(100);Anaerotruncus(100);	0	0	0	0	0	1	0	0	0	0	0
Otu000707	Bacteria(100);Firmicutes(100);Clostridia(100);Clostridiales(100);Ruminococcaceae(100);Subdoligranulum(100);	0	0	0	0	2	0	1	0	0	0	0
Otu000708	Bacteria(100);Firmicutes(100);Clostridia(100);Clostridiales(100);Ruminococcaceae(100);unclassified(82);	0	0	0	0	0	0	0	0	0	1	0
Otu000712	Bacteria(100);Firmicutes(100);Clostridia(100);Clostridiales(100);unclassified(64);unclassified(64);	0	0	0	0	0	0	1	0	0	1	0
Otu000713	Bacteria(100);unclassified(82);unclassified(82);unclassified(82);unclassified(82);unclassified(82);	0	0	0	0	0	1	0	1	0	0	0
Otu000714	Bacteria(100);Firmicutes(100);Clostridia(100);Clostridiales(100);Ruminococcaceae(100);unclassified(100);	0	0	0	0	0	1	0	0	0	1	0
Otu000716	Bacteria(100);Firmicutes(100);Clostridia(100);Clostridiales(100);Ruminococcaceae(100);unclassified(100);	0	0	0	0	0	0	0	0	0	0	1
Otu000717	Bacteria(100);Firmicutes(100);Clostridia(100);Clostridiales(100);Ruminococcaceae(100);Incertae_Sedis(82);	0	0	0	0	0	0	0	1	0	1	1
Otu000718	Bacteria(100);Firmicutes(100);Clostridia(100);Clostridiales(100);Family_XIII(100);Incertae_Sedis(100);	0	2	0	0	0	0	0	0	0	1	1
Otu000720	Bacteria(100);Firmicutes(100);Clostridia(100);Clostridiales(100);Christensenellaceae(100);Christensenella(100);	0	0	1	0	0	1	0	0	0	0	0
Otu000721	Bacteria(100);Firmicutes(100);Clostridia(100);Clostridiales(100);Ruminococcaceae(100);unclassified(73);	0	0	0	0	0	0	0	1	0	0	0
Otu000723	Bacteria(100);Firmicutes(100);Clostridia(100);Clostridiales(100);Family_XI(100);Anaerococcus(100);	0	0	1	0	0	0	0	0	0	0	0
Otu000726	Bacteria(100);Bacteroidetes(100);Bacteroidia(100);Bacteroidales(100);Porphyromonadaceae(100);Parabacteroides(100);	0	0	0	0	0	0	0	0	1	0	0
Otu000732	Bacteria(100);Firmicutes(100);Clostridia(100);Clostridiales(100);Ruminococcaceae(100);Incertae_Sedis(82);	0	0	0	0	0	0	0	1	0	1	0
Otu000733	Bacteria(100);Firmicutes(100);Clostridia(100);Clostridiales(100);unclassified(82);unclassified(82);	0	0	0	1	0	0	0	0	0	0	0
Otu000734	Bacteria(100);Firmicutes(100);Clostridia(100);Clostridiales(100);Lachnospiraceae(100);Coprococcus(55);	0	0	0	0	0	0	0	0	0	0	1
Otu000736	Bacteria(100);Actinobacteria(90);Coriobacteriia(90);Coriobacteriales(90);Coriobacteriaceae(90);Collinsella(61);	0	0	0	0	0	0	1	0	0	0	0
Otu000737	Bacteria(100);unclassified(90);unclassified(90);unclassified(90);unclassified(90);unclassified(90);	0	0	0	0	1	0	0	0	0	0	0
Otu000741	Bacteria(100);Firmicutes(100);Clostridia(100);Clostridiales(100);Ruminococcaceae(100);Anaerotruncus(100);	0	0	1	0	0	0	0	0	0	0	0
Otu000743	Bacteria(100);Firmicutes(100);Bacilli(100);Lactobacillales(100);Carnobacteriaceae(100);Granulicatella(100);	0	0	0	0	0	0	0	0	0	1	0
Otu000746	Bacteria(100);Firmicutes(100);Clostridia(100);Clostridiales(100);Ruminococcaceae(100);Faecalibacterium(70);	0	0	0	0	0	0	1	0	0	0	0
Otu000749	Bacteria(100);Firmicutes(100);Clostridia(100);Clostridiales(100);Ruminococcaceae(100);unclassified(100);	0	0	0	0	0	0	1	0	0	0	0
Otu000753	Bacteria(100);Firmicutes(100);Clostridia(100);Clostridiales(100);Ruminococcaceae(100);unclassified(90);	0	0	1	0	0	0	0	0	0	1	0
Otu000754	Bacteria(100);unclassified(100);unclassified(100);unclassified(100);unclassified(100);unclassified(100);	0	0	1	0	0	0	0	0	0	0	0
Otu000758	Bacteria(100);Firmicutes(100);Clostridia(100);Clostridiales(100);Ruminococcaceae(100);Oscillospira(100);	0	0	0	2	0	0	1	0	1	0	0
Otu000759	Bacteria(100);Firmicutes(100);Erysipelotrichia(100);Erysipelotrichales(100);Erysipelotrichaceae(100);Incertae_Sedis(100);	0	0	0	0	0	0	0	0	0	0	1
Otu000760	Bacteria(100);Firmicutes(100);Erysipelotrichia(100);Erysipelotrichales(100);Erysipelotrichaceae(100);Incertae_Sedis(100);	0	0	0	0	2	0	0	0	0	0	0
Otu000763	Bacteria(100);Firmicutes(100);Erysipelotrichia(100);Erysipelotrichales(100);Erysipelotrichaceae(100);Incertae_Sedis(100);	0	0	0	1	0	0	0	0	0	0	0
Otu000766	Bacteria(100);Firmicutes(100);Clostridia(100);Clostridiales(100);Defluviitaleaceae(100);Incertae_Sedis(100);	0	0	0	1	0	0	0	0	0	0	0
Otu000767	Bacteria(100);Firmicutes(100);Clostridia(100);Clostridiales(100);vadinBB60(78);unclassified(78);	0	0	0	0	0	0	0	1	0	0	0
Otu000768	Bacteria(100);Firmicutes(100);Clostridia(100);Clostridiales(100);Ruminococcaceae(100);Incertae_Sedis(100);	0	0	0	0	1	0	0	0	0	0	0
Otu000774	Bacteria(100);Firmicutes(100);Clostridia(100);Clostridiales(100);unclassified(89);unclassified(89);	0	0	0	0	0	0	0	1	0	0	0
Otu000777	Bacteria(100);Firmicutes(100);Clostridia(100);Clostridiales(100);Ruminococcaceae(100);Butyricicoccus(100);	0	0	0	0	0	0	1	0	0	0	0
Otu000778	Bacteria(100);Firmicutes(100);Clostridia(100);Clostridiales(100);Ruminococcaceae(100);unclassified(56);	0	0	0	0	0	0	0	1	0	0	0
Otu000779	Bacteria(100);Bacteroidetes(100);Bacteroidia(100);Bacteroidales(100);Bacteroidaceae(89);Bacteroides(89);	0	0	0	0	0	0	0	1	0	0	0
Otu000782	Bacteria(100);Firmicutes(100);Clostridia(100);Clostridiales(100);Ruminococcaceae(100);Intestinimonas(100);	2	0	0	0	0	0	0	0	0	0	0
Otu000783	Bacteria(100);Firmicutes(100);Clostridia(100);Clostridiales(100);Peptococcaceae(100);Dehalobacterium(100);	0	0	0	0	0	1	0	0	0	0	1
Otu000784	Bacteria(100);Firmicutes(100);Clostridia(100);Clostridiales(100);Ruminococcaceae(100);Incertae_Sedis(100);	0	0	0	0	0	1	0	0	0	0	1
Otu000785	Bacteria(100);Verrucomicrobia(100);Verrucomicrobiae(100);Verrucomicrobiales(100);Verrucomicrobiaceae(100);Akkermansia(100);	0	0	0	0	0	1	0	0	0	0	0
Otu000788	Bacteria(100);Firmicutes(100);Clostridia(100);Clostridiales(100);Clostridiaceae_1(100);Clostridium_sensu_stricto_3(100);	0	0	0	0	0	0	0	1	0	0	0
Otu000789	Bacteria(100);Firmicutes(100);Clostridia(100);Clostridiales(100);Ruminococcaceae(100);unclassified(100);	3	0	0	0	0	0	0	0	0	0	0
Otu000791	Bacteria(100);Firmicutes(100);Clostridia(100);Clostridiales(100);Ruminococcaceae(100);Anaerotruncus(100);	0	0	0	0	0	0	0	0	0	3	0
Otu000792	Bacteria(100);Firmicutes(100);Clostridia(100);Clostridiales(100);Lachnospiraceae(100);Roseburia(78);	0	0	0	0	0	0	0	0	0	1	1
Otu000793	Bacteria(100);Bacteroidetes(100);Bacteroidia(100);Bacteroidales(100);Prevotellaceae(100);Prevotella(100);	0	0	1	0	0	0	0	0	0	0	0
Otu000794	Bacteria(100);Firmicutes(100);Clostridia(100);Clostridiales(100);Ruminococcaceae(100);Faecalibacterium(100);	1	0	0	0	0	0	0	0	0	0	0
Otu000796	Bacteria(100);Firmicutes(100);Clostridia(100);Clostridiales(100);Ruminococcaceae(100);unclassified(100);	1	0	0	0	0	0	0	0	0	0	0
Otu000797	Bacteria(100);Actinobacteria(100);Actinobacteria(100);Actinomycetales(100);Actinomycetaceae(100);Actinomyces(100);	0	1	0	0	0	0	0	0	0	0	0
Otu000798	Bacteria(100);Firmicutes(100);Clostridia(100);Clostridiales(100);Lachnospiraceae(100);unclassified(78);	0	0	0	0	0	0	0	1	0	0	0
Otu000799	Bacteria(100);Firmicutes(100);Clostridia(100);Clostridiales(100);Peptococcaceae(78);Dehalobacterium(56);	1	0	0	0	0	0	0	1	0	0	0
Otu000808	Bacteria(100);Firmicutes(88);Clostridia(88);Clostridiales(88);Ruminococcaceae(88);Faecalibacterium(75);	0	0	0	1	0	0	0	0	0	0	0
Otu000811	Bacteria(100);Firmicutes(100);Clostridia(100);Clostridiales(100);Ruminococcaceae(100);unclassified(100);	0	1	0	0	0	0	0	0	0	0	0
Otu000814	Bacteria(100);Firmicutes(100);Clostridia(100);Clostridiales(100);Lachnospiraceae(75);unclassified(75);	0	0	0	0	0	0	0	0	0	1	1
Otu000816	Bacteria(100);Firmicutes(100);Clostridia(100);Clostridiales(100);Ruminococcaceae(100);unclassified(100);	1	0	0	0	0	0	0	0	0	0	0
Otu000817	Bacteria(100);unclassified(100);unclassified(100);unclassified(100);unclassified(100);unclassified(100);	0	0	2	0	0	0	0	1	0	0	0
Otu000820	Bacteria(100);Firmicutes(100);Clostridia(100);Clostridiales(100);Peptococcaceae(100);Dehalobacterium(100);	0	0	0	0	0	1	0	0	0	0	0
Otu000824	Bacteria(100);Bacteroidetes(100);Bacteroidia(100);Bacteroidales(100);Prevotellaceae(100);Prevotella(100);	0	0	0	0	1	0	0	0	0	0	0
Otu000825	Bacteria(100);Firmicutes(100);Clostridia(100);Clostridiales(100);Christensenellaceae(100);unclassified(100);	0	0	0	0	0	1	0	0	0	0	1
Otu000829	Bacteria(100);Actinobacteria(100);Actinobacteria(100);Actinomycetales(100);Actinomycetaceae(100);Actinomyces(100);	0	0	1	0	0	0	0	0	0	0	0
Otu000831	Bacteria(100);Firmicutes(88);Clostridia(88);Clostridiales(88);Ruminococcaceae(88);unclassified(88);	0	0	0	0	0	0	0	0	0	1	0
Otu000832	Bacteria(100);Firmicutes(100);Clostridia(100);Clostridiales(100);Lachnospiraceae(88);unclassified(88);	0	0	0	1	0	0	0	0	0	0	0
Otu000833	Bacteria(100);Bacteroidetes(100);Bacteroidia(100);Bacteroidales(100);Porphyromonadaceae(100);Porphyromonas(100);	0	0	0	1	1	0	0	0	0	0	0
Otu000834	Bacteria(100);Tenericutes(100);Mollicutes(100);RF9(100);unclassified(100);unclassified(100);	0	0	0	0	0	0	0	2	0	0	0
Otu000835	Bacteria(100);Firmicutes(100);Clostridia(100);Clostridiales(100);Ruminococcaceae(100);unclassified(100);	0	0	1	0	0	0	0	0	0	0	0
Otu000838	Bacteria(100);Firmicutes(100);Clostridia(100);Clostridiales(100);Ruminococcaceae(100);Ruminococcus(100);	0	0	0	0	3	0	0	0	0	0	0
Otu000840	Bacteria(100);Firmicutes(100);Clostridia(100);Clostridiales(100);unclassified(100);unclassified(100);	0	0	0	0	0	1	0	0	0	0	0
Otu000845	Bacteria(100);Firmicutes(100);Clostridia(88);Clostridiales(88);Lachnospiraceae(88);unclassified(88);	0	0	1	1	0	0	0	0	0	0	0
Otu000849	Bacteria(100);Firmicutes(100);Negativicutes(88);Selenomonadales(88);Veillonellaceae(88);Dialister(88);	0	0	1	0	0	0	0	0	0	0	0
Otu000858	Bacteria(100);Firmicutes(100);Erysipelotrichia(100);Erysipelotrichales(100);Erysipelotrichaceae(100);Solobacterium(100);	0	1	0	0	0	0	1	0	0	0	0
Otu000859	Bacteria(100);Firmicutes(100);Clostridia(100);Clostridiales(100);Ruminococcaceae(100);unclassified(100);	0	0	0	1	0	0	0	0	0	0	0
Otu000860	Bacteria(100);Firmicutes(100);Clostridia(100);Clostridiales(100);Ruminococcaceae(100);Faecalibacterium(100);	0	0	0	0	0	1	0	0	0	0	0
Otu000862	Bacteria(100);Bacteroidetes(100);Bacteroidia(100);Bacteroidales(100);unclassified(58);unclassified(58);	0	0	0	0	0	0	0	1	0	0	0
Otu000865	Bacteria(100);Firmicutes(100);Clostridia(100);Clostridiales(100);Ruminococcaceae(72);unclassified(58);	0	0	0	0	0	0	0	2	0	1	2
Otu000867	Bacteria(100);Firmicutes(100);Clostridia(100);Clostridiales(100);Ruminococcaceae(100);Anaerotruncus(100);	0	0	0	0	0	0	0	0	1	0	0
Otu000868	Bacteria(100);Firmicutes(100);Clostridia(100);Clostridiales(100);Ruminococcaceae(72);unclassified(58);	0	0	0	0	2	0	0	0	0	0	0
Otu000870	Bacteria(100);Firmicutes(100);Clostridia(100);Clostridiales(100);Ruminococcaceae(100);unclassified(100);	0	0	0	0	0	1	0	1	0	0	0
Otu000871	Bacteria(100);Firmicutes(100);Clostridia(72);Clostridiales(72);Ruminococcaceae(72);unclassified(72);	0	0	0	0	0	0	1	0	1	0	0
Otu000874	Bacteria(100);Firmicutes(100);Clostridia(100);Clostridiales(100);Lachnospiraceae(100);unclassified(100);	0	0	0	1	0	0	0	0	0	0	0
Otu000876	Bacteria(100);Firmicutes(100);Bacilli(100);Bacillales(100);Family_XI(100);Gemella(100);	0	0	0	0	1	0	0	0	1	0	0
Otu000878	Bacteria(100);Firmicutes(100);Bacilli(100);Lactobacillales(100);Streptococcaceae(100);Streptococcus(100);	0	0	0	0	0	0	1	0	0	0	0
Otu000881	Bacteria(100);Firmicutes(100);Clostridia(100);Thermoanaerobacterales(100);Thermoanaerobacteraceae(100);Gelria(100);	0	0	0	0	0	1	0	0	0	0	0
Otu000882	Bacteria(100);Firmicutes(100);Bacilli(100);Lactobacillales(100);Lactobacillaceae(100);Lactobacillus(100);	0	0	0	0	0	0	0	0	1	0	0
Otu000885	Bacteria(100);Firmicutes(100);Clostridia(100);Clostridiales(100);Ruminococcaceae(100);unclassified(100);	0	0	0	0	0	0	0	0	0	1	0
Otu000887	Bacteria(100);Actinobacteria(100);Actinobacteria(100);Bifidobacteriales(100);Bifidobacteriaceae(100);Bifidobacterium(58);	0	0	0	0	1	0	0	0	0	0	0
Otu000888	Bacteria(100);Firmicutes(100);Clostridia(100);Clostridiales(100);Ruminococcaceae(100);unclassified(100);	0	2	0	0	0	0	0	1	0	0	0
Otu000892	Bacteria(100);Firmicutes(100);Clostridia(100);Clostridiales(100);Ruminococcaceae(100);unclassified(100);	0	0	0	0	0	0	0	1	0	0	0
Otu000893	Bacteria(100);Firmicutes(100);Clostridia(100);Clostridiales(100);Ruminococcaceae(100);Incertae_Sedis(58);	0	0	0	0	0	0	0	1	0	0	0
Otu000899	Bacteria(100);Firmicutes(100);Clostridia(100);Clostridiales(100);Ruminococcaceae(100);unclassified(58);	0	0	0	1	0	0	0	1	0	0	0
Otu000900	Bacteria(100);Firmicutes(100);Clostridia(100);Clostridiales(100);Ruminococcaceae(100);Oscillibacter(58);	0	0	0	0	0	1	0	0	0	0	0
Otu000904	Bacteria(100);Bacteroidetes(100);Bacteroidia(100);Bacteroidales(100);Prevotellaceae(100);Prevotella(100);	0	0	0	0	0	0	0	0	1	0	0
Otu000906	Bacteria(100);Firmicutes(100);Clostridia(100);Clostridiales(100);Lachnospiraceae(67);unclassified(67);	0	0	0	0	0	0	0	1	0	2	0
Otu000912	Bacteria(100);Bacteroidetes(100);Bacteroidia(100);Bacteroidales(100);Porphyromonadaceae(100);Coprobacter(100);	0	0	1	0	0	0	0	0	0	0	0
Otu000924	Bacteria(100);Firmicutes(100);Clostridia(100);Clostridiales(100);Lachnospiraceae(100);Lachnospira(67);	0	0	0	0	0	0	0	1	0	1	0
Otu000925	Bacteria(100);Firmicutes(100);Clostridia(100);Clostridiales(100);Ruminococcaceae(100);unclassified(100);	0	0	0	0	0	0	0	1	0	0	0
Otu000928	Bacteria(100);Firmicutes(100);Clostridia(100);Clostridiales(100);Ruminococcaceae(100);unclassified(100);	0	0	0	0	0	1	0	0	0	0	0
Otu000931	Bacteria(100);Tenericutes(100);Mollicutes(100);RF9(100);unclassified(100);unclassified(100);	0	0	0	1	0	0	0	0	0	0	0
Otu000937	Bacteria(100);Firmicutes(100);Clostridia(100);Clostridiales(100);Ruminococcaceae(100);Incertae_Sedis(100);	0	0	0	0	0	0	1	0	1	0	0
Otu000941	Bacteria(100);Firmicutes(100);Clostridia(100);Clostridiales(100);Ruminococcaceae(100);unclassified(100);	0	0	0	0	0	0	1	0	0	0	0
Otu000946	Bacteria(100);Firmicutes(100);Negativicutes(100);Selenomonadales(100);Veillonellaceae(100);Dialister(100);	0	0	1	0	0	0	1	0	0	0	0
Otu000954	Bacteria(100);Firmicutes(100);Erysipelotrichia(100);Erysipelotrichales(100);Erysipelotrichaceae(100);unclassified(100);	0	0	0	0	1	0	0	0	0	0	0
Otu000956	Bacteria(100);Firmicutes(100);Clostridia(100);Clostridiales(100);Ruminococcaceae(100);unclassified(100);	0	0	1	0	0	0	0	0	0	0	0
Otu000958	Bacteria(100);Firmicutes(100);Negativicutes(100);Selenomonadales(100);Veillonellaceae(100);unclassified(100);	0	0	0	0	0	1	0	1	0	0	0
Otu000966	Bacteria(100);Firmicutes(100);Clostridia(100);Clostridiales(100);Defluviitaleaceae(100);Incertae_Sedis(100);	0	0	0	1	0	0	0	0	0	0	0
Otu000967	Bacteria(100);Fusobacteria(100);Fusobacteriia(100);Fusobacteriales(100);Fusobacteriaceae(100);Fusobacterium(100);	0	0	0	0	0	0	0	0	1	0	0
Otu000968	Bacteria(100);Firmicutes(100);Clostridia(100);Clostridiales(100);unclassified(100);unclassified(100);	0	0	0	0	1	0	0	0	0	0	0
Otu000970	Bacteria(100);Actinobacteria(100);Actinobacteria(100);Bifidobacteriales(100);Bifidobacteriaceae(100);Bifidobacterium(84);	0	0	0	0	0	0	0	1	0	0	0
Otu000973	Bacteria(100);Actinobacteria(100);Actinobacteria(100);Bifidobacteriales(100);Bifidobacteriaceae(100);unclassified(100);	0	0	0	0	1	0	0	0	0	0	0
Otu000977	Bacteria(100);Firmicutes(100);Clostridia(100);Clostridiales(100);Ruminococcaceae(67);unclassified(100);	0	0	0	0	0	0	0	0	0	0	1
Otu000980	Bacteria(100);Firmicutes(100);Clostridia(100);Clostridiales(100);Lachnospiraceae(100);unclassified(100);	0	0	0	1	0	0	0	0	1	0	0
Otu000981	Bacteria(100);Firmicutes(100);Clostridia(100);Clostridiales(100);Lachnospiraceae(100);unclassified(100);	0	0	0	1	0	1	0	0	0	0	0
Otu000984	Bacteria(100);Bacteroidetes(100);Bacteroidia(100);Bacteroidales(100);Bacteroidaceae(100);Bacteroides(100);	0	0	0	1	0	0	0	0	0	0	0
Otu000988	Bacteria(100);Firmicutes(100);Clostridia(100);Clostridiales(100);Lachnospiraceae(100);unclassified(84);	0	0	0	0	0	1	0	0	0	0	0
Otu000989	Bacteria(100);unclassified(100);unclassified(100);unclassified(100);unclassified(100);unclassified(100);	1	0	0	0	0	0	0	0	0	0	0
Otu000992	Bacteria(100);Firmicutes(100);Clostridia(100);Clostridiales(100);Lachnospiraceae(100);unclassified(100);	0	0	0	1	0	0	0	0	0	0	0
Otu000995	Bacteria(100);Firmicutes(100);Clostridia(100);Clostridiales(100);Ruminococcaceae(100);unclassified(61);	0	0	0	0	0	1	0	0	0	0	0
Otu000996	Bacteria(100);Actinobacteria(100);Actinobacteria(100);Bifidobacteriales(100);Bifidobacteriaceae(100);Bifidobacterium(100);	0	0	0	0	0	0	3	0	0	0	0
Otu001001	Bacteria(100);Bacteroidetes(100);Bacteroidia(100);Bacteroidales(100);Prevotellaceae(100);Prevotella(100);	0	0	1	0	0	0	0	0	0	0	0
Otu001006	Bacteria(100);Firmicutes(100);Clostridia(100);Clostridiales(100);Ruminococcaceae(100);unclassified(100);	0	0	0	0	0	0	0	0	1	0	0
Otu001008	Bacteria(100);Firmicutes(100);Clostridia(100);Clostridiales(100);Lachnospiraceae(100);Blautia(80);	0	0	0	0	0	0	0	0	0	0	1
Otu001010	Bacteria(100);Firmicutes(100);Clostridia(100);Clostridiales(100);unclassified(100);unclassified(100);	0	0	0	0	0	0	0	0	0	1	1
Otu001012	Bacteria(100);Firmicutes(100);Clostridia(100);Clostridiales(100);Ruminococcaceae(100);Incertae_Sedis(100);	0	0	1	0	0	2	0	0	0	1	0
Otu001018	Bacteria(100);Firmicutes(100);Clostridia(100);Clostridiales(100);Lachnospiraceae(100);unclassified(61);	0	0	0	0	0	0	0	0	0	1	0
Otu001023	Bacteria(100);unclassified(100);unclassified(100);unclassified(100);unclassified(100);unclassified(100);	0	0	0	0	0	2	0	0	0	0	0
Otu001024	Bacteria(100);Actinobacteria(100);Actinobacteria(100);Bifidobacteriales(100);Bifidobacteriaceae(100);unclassified(100);	0	0	0	1	0	0	0	1	0	0	0
Otu001025	Bacteria(100);Firmicutes(100);Clostridia(100);Clostridiales(100);Lachnospiraceae(100);unclassified(100);	1	0	0	0	0	0	0	0	0	0	0
Otu001032	Bacteria(100);Firmicutes(100);Clostridia(100);Clostridiales(100);Ruminococcaceae(100);Anaerofilum(61);	0	0	1	0	0	0	0	0	1	0	0
Otu001035	Bacteria(100);Firmicutes(100);Clostridia(100);Clostridiales(100);Lachnospiraceae(100);unclassified(100);	0	0	0	0	0	0	0	1	0	0	0
Otu001041	Bacteria(100);Firmicutes(100);Negativicutes(100);Selenomonadales(100);Acidaminococcaceae(80);Phascolarctobacterium(80);	0	0	0	0	0	1	0	1	0	0	0
Otu001048	Bacteria(100);Firmicutes(100);Clostridia(100);Clostridiales(100);Ruminococcaceae(100);Anaerotruncus(100);	0	0	0	1	0	0	0	0	0	0	0
Otu001050	Bacteria(100);Firmicutes(100);Clostridia(100);Clostridiales(100);Ruminococcaceae(100);Hydrogenoanaerobacterium(61);	0	0	0	0	1	0	0	0	0	0	0
Otu001052	Bacteria(100);Firmicutes(100);Clostridia(100);Clostridiales(100);unclassified(80);unclassified(80);	0	0	0	0	1	0	0	0	0	0	1
Otu001054	Bacteria(100);Firmicutes(100);Clostridia(100);Clostridiales(100);Ruminococcaceae(100);Ruminococcus(80);	0	0	0	0	0	0	0	0	0	1	0
Otu001056	Bacteria(100);Firmicutes(61);Clostridia(61);Clostridiales(61);unclassified(61);unclassified(61);	0	0	0	0	0	0	0	0	0	1	0
Otu001062	Bacteria(100);Firmicutes(100);Clostridia(100);Clostridiales(100);Lachnospiraceae(100);unclassified(100);	0	0	0	0	0	0	0	1	1	0	0
Otu001063	Bacteria(100);Firmicutes(100);Clostridia(100);Clostridiales(100);Ruminococcaceae(100);Anaerotruncus(100);	0	0	0	0	0	0	0	1	0	0	0
Otu001064	Bacteria(100);Firmicutes(100);Clostridia(100);Clostridiales(100);Ruminococcaceae(100);Incertae_Sedis(80);	0	0	0	0	0	0	0	1	0	0	0
Otu001066	Bacteria(100);Bacteroidetes(100);Bacteroidia(100);Bacteroidales(100);Porphyromonadaceae(100);Porphyromonas(100);	0	0	0	1	0	0	0	0	0	0	0
Otu001070	Bacteria(100);Firmicutes(100);Clostridia(100);Clostridiales(100);Ruminococcaceae(80);unclassified(80);	0	0	2	0	0	0	0	0	0	0	0
Otu001071	Bacteria(100);Firmicutes(100);Negativicutes(100);Selenomonadales(100);Veillonellaceae(100);Dialister(100);	0	0	1	0	0	0	0	0	0	0	0
Otu001073	Bacteria(100);Firmicutes(100);Clostridia(100);Clostridiales(100);unclassified(100);unclassified(100);	0	0	0	0	0	0	0	0	0	0	1
Otu001086	Bacteria(100);Firmicutes(100);Clostridia(100);Clostridiales(100);Ruminococcaceae(100);Subdoligranulum(100);	0	1	0	0	0	0	0	0	0	0	0
Otu001091	Bacteria(100);Firmicutes(100);Clostridia(100);Clostridiales(100);Ruminococcaceae(100);Anaerofilum(100);	0	0	0	0	0	1	0	0	0	0	0
Otu001092	Bacteria(100);Firmicutes(100);unclassified(100);unclassified(100);unclassified(100);unclassified(100);	0	0	0	0	0	0	1	0	0	0	0
Otu001094	Bacteria(100);Firmicutes(100);Clostridia(100);Clostridiales(100);unclassified(100);unclassified(100);	0	0	0	0	0	2	0	0	0	0	0
Otu001099	Bacteria(100);unclassified(80);unclassified(80);unclassified(80);unclassified(80);unclassified(80);	0	1	0	0	0	0	0	0	0	0	0
Otu001102	Bacteria(100);Firmicutes(100);Clostridia(100);Clostridiales(100);Lachnospiraceae(100);unclassified(100);	0	0	0	0	0	0	0	0	0	0	1
Otu001105	Bacteria(100);Bacteroidetes(100);Bacteroidia(100);Bacteroidales(100);unclassified(100);unclassified(100);	1	0	0	0	0	0	0	0	0	0	0
Otu001106	Bacteria(100);Firmicutes(100);Clostridia(100);Clostridiales(100);Lachnospiraceae(100);Incertae_Sedis(80);	0	0	0	0	0	0	1	0	0	0	0
Otu001110	Bacteria(100);Bacteroidetes(100);Bacteroidia(100);Bacteroidales(100);Prevotellaceae(100);Prevotella(100);	0	0	0	0	0	0	1	0	0	0	0
Otu001113	Bacteria(100);Firmicutes(100);Clostridia(100);Clostridiales(100);Ruminococcaceae(100);unclassified(100);	0	0	0	0	1	0	0	0	0	0	0
Otu001117	Bacteria(100);Firmicutes(100);Clostridia(100);Clostridiales(100);Lachnospiraceae(100);unclassified(100);	0	0	0	1	0	0	0	0	0	0	0
Otu001120	Bacteria(100);Bacteroidetes(100);Bacteroidia(100);Bacteroidales(100);Porphyromonadaceae(75);Parabacteroides(75);	2	0	0	0	0	0	0	0	0	0	0
Otu001121	Bacteria(100);Firmicutes(100);Clostridia(75);unclassified(100);unclassified(100);unclassified(100);	0	0	0	0	0	0	0	0	1	0	0
Otu001127	Bacteria(100);Actinobacteria(100);Coriobacteriia(100);Coriobacteriales(100);Coriobacteriaceae(100);unclassified(100);	0	0	0	1	0	0	0	0	0	0	0
Otu001130	Bacteria(100);Actinobacteria(100);Actinobacteria(100);Bifidobacteriales(100);Bifidobacteriaceae(100);Bifidobacterium(100);	0	0	0	0	0	0	1	0	0	0	0
Otu001132	Bacteria(100);unclassified(100);unclassified(100);unclassified(100);unclassified(100);unclassified(100);	0	0	1	0	0	0	0	0	0	0	0
Otu001133	Bacteria(100);Proteobacteria(100);Alphaproteobacteria(100);Rhizobiales(100);Rhodobiaceae(100);Rhodobium(100);	0	0	0	0	0	1	0	0	0	0	0
Otu001140	Bacteria(100);Firmicutes(100);Clostridia(100);Clostridiales(100);unclassified(100);unclassified(100);	0	2	0	0	0	0	0	0	0	0	0
Otu001143	Bacteria(100);Firmicutes(100);Clostridia(100);Clostridiales(100);Ruminococcaceae(100);unclassified(100);	0	0	0	0	0	0	0	0	0	1	0
Otu001145	Bacteria(100);unclassified(100);unclassified(100);unclassified(100);unclassified(100);unclassified(100);	0	0	0	0	2	0	0	0	0	0	1
Otu001154	Bacteria(100);Firmicutes(75);Clostridia(75);Clostridiales(75);unclassified(75);unclassified(75);	0	0	0	0	0	0	0	0	0	0	1
Otu001155	Bacteria(100);Firmicutes(100);Clostridia(100);Clostridiales(100);unclassified(75);unclassified(75);	0	0	0	0	1	0	0	1	0	0	0
Otu001157	Bacteria(100);Firmicutes(100);Clostridia(100);Clostridiales(100);Ruminococcaceae(100);unclassified(100);	0	0	0	0	1	0	0	0	0	0	0
Otu001158	Bacteria(100);Firmicutes(100);Clostridia(100);Clostridiales(100);Ruminococcaceae(100);unclassified(100);	0	0	0	0	0	0	0	0	1	0	0
Otu001160	Bacteria(100);Firmicutes(100);Clostridia(100);Clostridiales(100);Lachnospiraceae(100);unclassified(100);	0	0	0	0	0	0	0	2	0	0	0
Otu001161	Bacteria(100);Firmicutes(100);Clostridia(100);Clostridiales(100);Peptostreptococcaceae(100);Incertae_Sedis(75);	0	0	0	0	0	0	1	0	0	0	0
Otu001165	Bacteria(100);Firmicutes(100);Clostridia(100);Clostridiales(100);Ruminococcaceae(100);unclassified(100);	0	0	0	0	0	0	1	0	0	0	0
Otu001169	Bacteria(100);Firmicutes(100);Clostridia(100);Clostridiales(100);Lachnospiraceae(100);Anaerostipes(100);	0	0	1	0	0	0	0	0	0	0	0
Otu001175	Bacteria(100);unclassified(100);unclassified(100);unclassified(100);unclassified(100);unclassified(100);	0	0	0	0	1	0	0	0	0	0	0
Otu001176	Bacteria(100);unclassified(100);unclassified(100);unclassified(100);unclassified(100);unclassified(100);	0	0	0	0	0	0	0	0	0	0	1
Otu001183	Bacteria(100);Bacteroidetes(100);Bacteroidia(100);Bacteroidales(100);unclassified(100);unclassified(100);	0	0	0	0	0	0	1	0	0	0	0
Otu001200	Bacteria(100);Firmicutes(100);Clostridia(100);Clostridiales(100);unclassified(100);unclassified(100);	0	0	0	0	0	0	0	0	0	1	0
Otu001201	Bacteria(100);Actinobacteria(100);Actinobacteria(100);Bifidobacteriales(100);Bifidobacteriaceae(100);unclassified(100);	0	0	0	0	1	0	0	0	0	0	0
Otu001204	Bacteria(100);Firmicutes(100);Clostridia(100);Clostridiales(100);Ruminococcaceae(75);unclassified(75);	0	0	0	0	0	0	0	0	0	1	0
Otu001210	Bacteria(100);Actinobacteria(100);Actinobacteria(100);Bifidobacteriales(100);Bifidobacteriaceae(100);Bifidobacterium(100);	0	0	1	0	0	0	0	0	0	0	0
Otu001214	Bacteria(100);Tenericutes(100);Mollicutes(100);RF9(100);unclassified(100);unclassified(100);	1	0	0	0	0	0	0	0	0	0	0
Otu001215	Bacteria(100);Firmicutes(100);Clostridia(100);Clostridiales(100);unclassified(100);unclassified(100);	0	0	1	0	0	0	0	0	0	0	0
Otu001222	Bacteria(100);Tenericutes(100);Mollicutes(100);RF9(100);unclassified(100);unclassified(100);	1	0	0	0	0	0	0	0	0	0	0
Otu001225	Bacteria(100);unclassified(100);unclassified(100);unclassified(100);unclassified(100);unclassified(100);	0	0	0	0	0	1	0	0	0	0	0
Otu001228	Bacteria(100);Firmicutes(100);Bacilli(100);Lactobacillales(100);Lactobacillaceae(100);Lactobacillus(100);	0	0	0	1	0	0	0	0	0	0	0
Otu001230	Bacteria(100);Firmicutes(100);Clostridia(100);Clostridiales(100);Ruminococcaceae(75);unclassified(100);	0	0	0	0	1	0	0	0	0	0	0
Otu001235	Bacteria(100);Bacteroidetes(100);Bacteroidia(100);Bacteroidales(100);Bacteroidaceae(75);Bacteroides(75);	0	0	0	0	0	2	0	0	0	0	0
Otu001241	Bacteria(100);unclassified(100);unclassified(100);unclassified(100);unclassified(100);unclassified(100);	0	0	0	0	0	1	0	1	0	0	0
Otu001253	Bacteria(100);Firmicutes(100);Erysipelotrichia(100);Erysipelotrichales(100);Erysipelotrichaceae(100);Incertae_Sedis(100);	0	0	0	1	0	0	0	0	0	0	0
Otu001255	Bacteria(100);Firmicutes(100);Clostridia(100);Clostridiales(100);Lachnospiraceae(75);unclassified(75);	0	0	0	0	0	0	0	0	0	1	2
Otu001258	Bacteria(100);Firmicutes(100);Clostridia(100);Clostridiales(100);Lachnospiraceae(100);Coprococcus(100);	0	0	0	1	0	0	0	0	0	0	0
Otu001259	Bacteria(100);Firmicutes(100);Clostridia(100);Clostridiales(100);Lachnospiraceae(100);Anaerostipes(100);	0	1	0	0	0	0	0	0	0	0	0
Otu001261	Bacteria(100);Actinobacteria(100);Actinobacteria(100);Bifidobacteriales(100);Bifidobacteriaceae(100);Bifidobacterium(100);	0	1	0	0	0	0	0	0	0	0	0
Otu001268	Bacteria(100);Firmicutes(100);Clostridia(100);Clostridiales(100);Ruminococcaceae(100);unclassified(100);	0	0	0	0	0	0	0	0	0	1	0
Otu001271	Bacteria(100);Firmicutes(100);Clostridia(100);Clostridiales(100);Lachnospiraceae(100);unclassified(100);	0	0	0	0	0	1	0	0	0	0	0
Otu001275	Bacteria(100);unclassified(100);unclassified(100);unclassified(100);unclassified(100);unclassified(100);	0	0	1	0	0	0	0	0	0	0	0
Otu001277	Bacteria(100);unclassified(75);unclassified(75);unclassified(75);unclassified(75);unclassified(75);	0	0	1	0	0	0	0	0	0	0	0
Otu001278	Bacteria(100);Firmicutes(100);Clostridia(100);Clostridiales(100);Ruminococcaceae(100);unclassified(75);	0	0	0	1	0	0	0	0	0	1	0
Otu001290	Bacteria(100);Firmicutes(100);Clostridia(100);Clostridiales(100);unclassified(67);unclassified(67);	0	0	0	0	0	0	0	1	0	0	0
Otu001292	Bacteria(100);Actinobacteria(100);Actinobacteria(100);Micrococcales(100);Micrococcaceae(100);Rothia(100);	0	0	1	0	0	0	0	0	0	0	0
Otu001293	Bacteria(100);Firmicutes(100);Clostridia(100);Clostridiales(100);Lachnospiraceae(100);unclassified(100);	0	0	0	0	0	0	0	0	0	1	0
Otu001299	Bacteria(100);Actinobacteria(100);Actinobacteria(100);Bifidobacteriales(100);Bifidobacteriaceae(100);Bifidobacterium(100);	0	0	0	0	0	0	1	0	0	0	0
Otu001301	Bacteria(100);Firmicutes(100);Clostridia(100);Clostridiales(67);unclassified(67);unclassified(67);	0	1	0	0	0	0	0	0	0	0	0
Otu001306	Bacteria(100);Firmicutes(100);Clostridia(100);Clostridiales(100);unclassified(100);unclassified(100);	0	0	0	0	0	0	0	1	0	0	0
Otu001307	Bacteria(100);Verrucomicrobia(100);Verrucomicrobiae(100);Verrucomicrobiales(100);Verrucomicrobiaceae(100);Akkermansia(100);	0	0	0	0	0	0	0	1	0	0	0
Otu001310	Bacteria(100);Firmicutes(100);unclassified(100);unclassified(100);unclassified(100);unclassified(100);	0	0	0	0	0	1	0	1	0	0	0
Otu001311	Bacteria(100);Bacteroidetes(100);Bacteroidia(100);Bacteroidales(100);Prevotellaceae(100);Prevotella(100);	0	0	0	0	0	0	0	0	1	0	0
Otu001313	Bacteria(100);Firmicutes(100);Clostridia(100);Clostridiales(100);Peptostreptococcaceae(100);unclassified(100);	0	0	0	0	1	0	0	0	0	0	0
Otu001314	Bacteria(100);Firmicutes(100);Clostridia(100);Clostridiales(100);Lachnospiraceae(100);unclassified(100);	0	0	0	0	0	0	0	0	0	0	1
Otu001319	Bacteria(100);Firmicutes(100);Clostridia(100);Clostridiales(100);Ruminococcaceae(100);unclassified(100);	0	0	0	0	1	0	0	0	0	0	0
Otu001321	Bacteria(100);Firmicutes(100);Clostridia(100);Clostridiales(100);Ruminococcaceae(100);unclassified(100);	0	0	0	0	0	0	0	0	0	0	1
Otu001325	Bacteria(100);Firmicutes(100);Clostridia(100);Clostridiales(100);Lachnospiraceae(100);Incertae_Sedis(100);	0	0	0	0	0	0	0	2	0	0	0
Otu001332	Bacteria(100);Actinobacteria(100);Actinobacteria(100);Bifidobacteriales(100);Bifidobacteriaceae(100);Bifidobacterium(67);	0	0	0	0	0	0	0	0	0	2	0
Otu001335	Bacteria(100);Firmicutes(100);Clostridia(100);Clostridiales(100);Ruminococcaceae(100);unclassified(67);	0	0	0	0	0	0	0	0	1	0	0
Otu001337	Bacteria(100);Bacteroidetes(100);Bacteroidia(100);Bacteroidales(100);Prevotellaceae(100);Prevotella(100);	2	0	0	0	0	0	0	0	0	0	0
Otu001339	Bacteria(100);Firmicutes(100);Clostridia(100);Clostridiales(100);Lachnospiraceae(100);Incertae_Sedis(100);	0	0	0	2	0	0	0	0	0	0	0
Otu001342	Bacteria(100);Firmicutes(100);Clostridia(100);Clostridiales(100);Ruminococcaceae(100);unclassified(100);	0	0	0	0	0	0	0	0	1	0	0
Otu001344	Bacteria(100);Firmicutes(100);Erysipelotrichia(100);Erysipelotrichales(100);Erysipelotrichaceae(100);unclassified(100);	0	0	0	0	1	0	0	0	0	0	0
Otu001349	Bacteria(100);Firmicutes(100);Clostridia(100);Clostridiales(100);Ruminococcaceae(100);Subdoligranulum(67);	0	0	0	0	0	1	0	0	0	0	0
Otu001350	Bacteria(100);Firmicutes(100);Clostridia(100);Clostridiales(100);Lachnospiraceae(100);unclassified(100);	0	0	0	1	0	0	0	1	0	0	0
Otu001351	Bacteria(100);Firmicutes(100);Clostridia(100);Clostridiales(100);Christensenellaceae(100);unclassified(100);	0	0	0	1	0	0	0	0	0	0	0
Otu001355	Bacteria(100);Firmicutes(100);Clostridia(100);Clostridiales(100);Lachnospiraceae(100);unclassified(100);	0	1	0	0	0	0	0	0	0	0	0
Otu001357	Bacteria(100);Firmicutes(100);Clostridia(100);Clostridiales(100);Ruminococcaceae(100);unclassified(100);	0	0	1	0	0	0	0	0	0	0	0
Otu001361	Bacteria(100);Firmicutes(100);Clostridia(100);Clostridiales(100);Lachnospiraceae(100);Incertae_Sedis(67);	0	0	0	0	0	0	0	1	0	0	0
Otu001366	Bacteria(100);unclassified(100);unclassified(100);unclassified(100);unclassified(100);unclassified(100);	0	1	0	0	0	0	0	0	0	0	0
Otu001367	Bacteria(100);Firmicutes(100);Clostridia(100);Clostridiales(100);Lachnospiraceae(100);Roseburia(67);	0	1	0	0	0	0	0	0	0	0	0
Otu001373	Bacteria(100);unclassified(100);unclassified(100);unclassified(100);unclassified(100);unclassified(100);	0	0	0	0	0	0	0	1	0	0	0
Otu001383	Bacteria(100);unclassified(100);unclassified(100);unclassified(100);unclassified(100);unclassified(100);	0	0	0	0	0	0	0	1	0	0	0
Otu001392	Bacteria(100);Firmicutes(100);Clostridia(100);Clostridiales(100);Ruminococcaceae(100);Anaerofilum(67);	0	0	0	0	0	0	0	0	1	0	0
Otu001393	Bacteria(100);Firmicutes(100);Clostridia(100);Clostridiales(100);Christensenellaceae(100);unclassified(100);	0	0	0	0	0	1	0	0	0	0	0
Otu001396	Bacteria(100);Firmicutes(100);Clostridia(100);Clostridiales(100);Ruminococcaceae(100);Incertae_Sedis(67);	0	0	0	0	0	0	0	0	0	1	0
Otu001401	Bacteria(100);Firmicutes(100);Clostridia(100);Clostridiales(100);Family_XIII(100);Incertae_Sedis(100);	0	0	2	0	0	0	0	0	0	0	0
Otu001418	Bacteria(100);Firmicutes(100);Clostridia(100);Clostridiales(100);Lachnospiraceae(100);unclassified(100);	0	0	0	0	0	0	1	0	0	0	0
Otu001428	Bacteria(100);Firmicutes(100);Clostridia(100);Clostridiales(100);Peptococcaceae(100);Dehalobacterium(100);	0	0	3	0	0	0	0	0	0	0	0
Otu001454	Bacteria(100);Firmicutes(100);unclassified(100);unclassified(100);unclassified(100);unclassified(100);	0	0	1	0	0	0	0	0	0	0	0
Otu001458	Bacteria(100);Firmicutes(100);Clostridia(100);Clostridiales(100);unclassified(67);unclassified(67);	0	3	0	0	0	0	0	0	0	0	0
Otu001460	Bacteria(100);Firmicutes(100);Clostridia(100);Clostridiales(100);unclassified(100);unclassified(100);	0	0	0	0	0	0	0	0	0	1	0
Otu001466	Bacteria(100);Firmicutes(100);Clostridia(100);Clostridiales(100);Ruminococcaceae(100);Incertae_Sedis(100);	0	0	0	0	0	0	0	0	0	0	2
Otu001469	Bacteria(100);Firmicutes(100);Clostridia(100);Clostridiales(100);unclassified(100);unclassified(100);	0	0	0	0	0	1	0	0	0	0	0
Otu001470	Bacteria(100);unclassified(100);unclassified(100);unclassified(100);unclassified(100);unclassified(100);	0	0	0	0	0	0	0	0	0	1	0
Otu001475	Bacteria(100);Firmicutes(100);Clostridia(100);Clostridiales(100);Lachnospiraceae(100);unclassified(100);	1	0	0	0	0	0	0	0	0	0	0
Otu001487	Bacteria(100);Firmicutes(100);Clostridia(100);Clostridiales(100);Ruminococcaceae(100);unclassified(100);	0	0	0	0	0	0	0	1	0	0	0
Otu001491	Bacteria(100);Firmicutes(100);Clostridia(100);Clostridiales(100);Ruminococcaceae(100);unclassified(100);	0	0	0	0	0	0	0	0	0	0	1
Otu001502	Bacteria(100);Firmicutes(100);Clostridia(100);Clostridiales(100);Lachnospiraceae(100);unclassified(67);	0	0	0	0	0	0	0	0	0	1	0
Otu001507	Bacteria(100);Firmicutes(100);Clostridia(100);Clostridiales(100);Lachnospiraceae(100);unclassified(100);	0	0	0	0	0	0	0	1	0	0	0
Otu001511	Bacteria(100);Actinobacteria(100);Acidimicrobiia(100);Acidimicrobiales(100);Acidimicrobiaceae(100);CL500-29_marine_group(100);	0	0	0	0	0	0	0	0	0	1	0
Otu001517	Bacteria(100);Firmicutes(100);Negativicutes(100);Selenomonadales(100);Veillonellaceae(100);Dialister(100);	0	0	0	0	0	0	1	0	0	0	0
Otu001518	Bacteria(100);Firmicutes(100);Clostridia(100);Clostridiales(100);Lachnospiraceae(100);unclassified(100);	0	0	0	0	0	0	0	1	0	1	0
Otu001525	Bacteria(100);Firmicutes(100);Clostridia(100);Clostridiales(100);Ruminococcaceae(100);unclassified(100);	0	0	0	0	0	1	0	0	0	0	1
Otu001542	Bacteria(100);Tenericutes(100);Mollicutes(100);NB1-n(67);unclassified(67);unclassified(67);	0	0	0	0	0	1	0	0	0	0	0
Otu001549	Bacteria(100);Actinobacteria(100);Coriobacteriia(100);Coriobacteriales(100);Coriobacteriaceae(100);unclassified(100);	0	0	1	0	0	0	0	0	0	0	0
Otu001550	Bacteria(100);Firmicutes(100);Clostridia(100);Clostridiales(100);Peptococcaceae(100);Dehalobacterium(100);	0	0	0	0	0	0	0	0	0	0	1
Otu001559	Bacteria(100);Firmicutes(100);Clostridia(100);Clostridiales(100);Ruminococcaceae(100);unclassified(100);	0	0	0	0	0	0	0	0	0	1	0
Otu001567	Bacteria(100);Firmicutes(100);Clostridia(100);Clostridiales(100);Ruminococcaceae(100);unclassified(67);	0	0	0	0	0	0	0	1	0	0	0
Otu001582	Bacteria(100);Firmicutes(67);unclassified(100);unclassified(100);unclassified(100);unclassified(100);	0	0	0	0	0	0	0	0	0	1	0
Otu001592	Bacteria(100);Firmicutes(100);Erysipelotrichia(100);Erysipelotrichales(100);Erysipelotrichaceae(100);unclassified(100);	0	0	0	0	0	0	0	0	0	1	0
Otu001605	Bacteria(100);Firmicutes(100);Clostridia(100);Clostridiales(100);Ruminococcaceae(100);Subdoligranulum(100);	0	0	0	1	0	1	0	0	0	0	0
Otu001627	Bacteria(100);Bacteroidetes(100);Bacteroidia(100);Bacteroidales(100);unclassified(100);unclassified(100);	0	0	0	1	0	0	0	0	0	0	0
Otu001647	Bacteria(100);Bacteroidetes(100);Bacteroidia(100);Bacteroidales(100);Bacteroidaceae(100);Bacteroides(100);	0	0	0	0	0	0	0	1	0	0	0
Otu001654	Bacteria(100);Firmicutes(100);Negativicutes(100);Selenomonadales(100);Veillonellaceae(100);Dialister(100);	0	0	0	0	0	0	0	0	1	0	0
Otu001669	Bacteria(100);Firmicutes(100);Clostridia(100);Clostridiales(100);Family_XIII(100);Incertae_Sedis(100);	0	0	0	0	0	0	1	0	0	0	0
Otu001675	Bacteria(100);Firmicutes(100);Clostridia(100);Clostridiales(100);Lachnospiraceae(100);unclassified(100);	0	0	0	0	0	0	0	1	0	0	0
Otu001687	Bacteria(100);Bacteroidetes(100);Bacteroidia(100);Bacteroidales(100);Bacteroidaceae(100);Bacteroides(100);	0	0	0	0	0	0	0	0	0	0	1
Otu001693	Bacteria(100);Actinobacteria(100);Coriobacteriia(100);Coriobacteriales(100);Coriobacteriaceae(100);Collinsella(100);	0	0	0	0	0	0	0	0	0	1	0
Otu001710	Bacteria(100);Verrucomicrobia(100);Spartobacteria(100);Chthoniobacterales(100);DA101_soil_group(100);unclassified(100);	0	0	0	0	0	0	0	0	0	0	1
Otu001713	Bacteria(100);Firmicutes(100);Clostridia(100);Clostridiales(100);Ruminococcaceae(100);Subdoligranulum(100);	0	0	0	0	0	0	0	0	1	0	0
Otu001714	Bacteria(100);Firmicutes(100);Clostridia(100);Clostridiales(100);Ruminococcaceae(100);Subdoligranulum(100);	0	0	0	0	0	0	1	0	0	0	0
Otu001724	Bacteria(100);Firmicutes(100);Clostridia(100);Clostridiales(100);Ruminococcaceae(100);unclassified(100);	0	0	1	0	0	0	0	1	0	0	0
Otu001736	Bacteria(100);unclassified(100);unclassified(100);unclassified(100);unclassified(100);unclassified(100);	0	0	1	0	0	0	0	0	0	0	0
Otu001742	Bacteria(100);Firmicutes(100);Clostridia(100);Clostridiales(100);Ruminococcaceae(100);unclassified(100);	0	0	0	0	0	0	0	0	0	1	0
Otu001769	Bacteria(100);unclassified(100);unclassified(100);unclassified(100);unclassified(100);unclassified(100);	0	0	0	0	0	1	0	0	0	0	0
Otu001771	Bacteria(100);Actinobacteria(100);Actinobacteria(100);Bifidobacteriales(100);Bifidobacteriaceae(100);unclassified(100);	0	0	1	0	0	0	0	0	0	0	0
Otu001775	Bacteria(100);unclassified(100);unclassified(100);unclassified(100);unclassified(100);unclassified(100);	0	0	0	0	0	0	0	0	0	2	0
Otu001788	Bacteria(100);Firmicutes(100);Erysipelotrichia(100);Erysipelotrichales(100);Erysipelotrichaceae(100);Catenibacterium(100);	0	0	0	1	0	0	0	0	0	0	0
Otu001792	Bacteria(100);Firmicutes(100);Clostridia(100);Clostridiales(100);Lachnospiraceae(100);unclassified(100);	0	0	0	0	0	0	0	0	0	2	0
Otu001796	Bacteria(100);Bacteroidetes(100);Bacteroidia(100);Bacteroidales(100);Porphyromonadaceae(100);Parabacteroides(100);	0	0	0	0	0	0	1	0	0	0	0
Otu001802	Bacteria(100);Firmicutes(100);Erysipelotrichia(100);Erysipelotrichales(100);Erysipelotrichaceae(100);Catenibacterium(100);	0	0	0	1	0	0	0	0	0	0	0
Otu001803	Bacteria(100);Firmicutes(100);Clostridia(100);Clostridiales(100);Lachnospiraceae(100);unclassified(100);	0	0	0	0	0	0	0	0	0	2	0
Otu001805	Bacteria(100);Firmicutes(100);Clostridia(100);Clostridiales(100);Ruminococcaceae(100);Faecalibacterium(100);	0	0	0	0	0	0	0	0	0	1	0
Otu001809	Bacteria(100);Firmicutes(100);Clostridia(100);Clostridiales(100);Ruminococcaceae(100);unclassified(100);	0	0	0	0	0	0	0	0	0	1	0
Otu001815	Bacteria(100);unclassified(100);unclassified(100);unclassified(100);unclassified(100);unclassified(100);	0	0	0	0	0	0	0	0	0	2	0
Otu001821	Bacteria(100);unclassified(100);unclassified(100);unclassified(100);unclassified(100);unclassified(100);	0	0	1	0	0	0	0	0	0	0	0
Otu001828	Bacteria(100);Firmicutes(100);Clostridia(100);Clostridiales(100);unclassified(100);unclassified(100);	0	0	0	0	0	0	0	0	0	2	0
Otu001838	Bacteria(100);Firmicutes(100);Clostridia(100);Clostridiales(100);unclassified(100);unclassified(100);	0	0	1	0	0	0	0	0	0	0	0
Otu001839	Bacteria(100);Bacteroidetes(100);Bacteroidia(100);Bacteroidales(100);Porphyromonadaceae(100);Parabacteroides(100);	0	0	0	0	0	1	0	0	0	0	0
Otu001840	Bacteria(100);Actinobacteria(100);Actinobacteria(100);Bifidobacteriales(100);Bifidobacteriaceae(100);unclassified(100);	0	0	0	0	0	1	0	0	0	0	0
Otu001847	Bacteria(100);Firmicutes(100);Clostridia(100);Clostridiales(100);Ruminococcaceae(100);unclassified(100);	0	0	0	0	0	0	0	1	0	0	0
Otu001848	Bacteria(100);Firmicutes(100);Clostridia(100);Clostridiales(100);Lachnospiraceae(100);unclassified(100);	0	0	0	1	0	0	0	0	0	0	0
Otu001861	Bacteria(100);Firmicutes(100);Erysipelotrichia(100);Erysipelotrichales(100);Erysipelotrichaceae(100);Incertae_Sedis(100);	0	0	0	1	0	0	0	0	0	0	0
Otu001888	Bacteria(100);Firmicutes(100);Bacilli(100);Lactobacillales(100);Streptococcaceae(100);Lactococcus(100);	0	0	1	0	0	0	0	0	0	0	0
Otu001901	Bacteria(100);Proteobacteria(100);Gammaproteobacteria(100);Pseudomonadales(100);Pseudomonadaceae(100);Pseudomonas(100);	0	0	0	0	1	0	0	0	0	0	0
Otu001904	Bacteria(100);Firmicutes(100);Clostridia(100);Clostridiales(100);Lachnospiraceae(100);Incertae_Sedis(100);	0	0	0	0	1	0	0	0	0	0	0
Otu001906	Bacteria(100);Firmicutes(100);Clostridia(100);Clostridiales(100);Ruminococcaceae(100);Subdoligranulum(100);	0	0	0	0	0	0	0	1	0	0	0
Otu001909	Bacteria(100);Firmicutes(100);Clostridia(100);Clostridiales(100);unclassified(100);unclassified(100);	0	0	0	0	0	0	0	0	0	1	0
Otu001913	Bacteria(100);unclassified(100);unclassified(100);unclassified(100);unclassified(100);unclassified(100);	0	0	0	0	0	1	0	0	0	0	0
Otu001915	Bacteria(100);Firmicutes(100);Clostridia(100);Clostridiales(100);Ruminococcaceae(100);unclassified(100);	0	0	1	0	0	0	0	0	0	0	0
Otu001920	Bacteria(100);Actinobacteria(100);Actinobacteria(100);Bifidobacteriales(100);Bifidobacteriaceae(100);Bifidobacterium(100);	0	0	0	0	0	0	0	0	0	1	0
Otu001921	Bacteria(100);Firmicutes(100);Clostridia(100);Clostridiales(100);Ruminococcaceae(100);unclassified(100);	0	0	0	0	0	1	0	0	0	0	0
Otu001924	Bacteria(100);Firmicutes(100);Clostridia(100);Clostridiales(100);Ruminococcaceae(100);unclassified(100);	0	0	0	0	0	0	0	0	0	0	1
Otu001926	Bacteria(100);Firmicutes(100);Clostridia(100);Clostridiales(100);Ruminococcaceae(100);unclassified(100);	0	0	0	0	0	0	0	0	0	2	0
Otu001937	Bacteria(100);Firmicutes(100);Clostridia(100);Clostridiales(100);Ruminococcaceae(100);Faecalibacterium(100);	1	0	0	0	0	0	0	0	0	0	0
Otu001950	Bacteria(100);Bacteroidetes(100);Bacteroidia(100);Bacteroidales(100);Bacteroidaceae(100);Bacteroides(100);	0	0	0	0	0	0	1	0	0	0	0
Otu001957	Bacteria(100);unclassified(100);unclassified(100);unclassified(100);unclassified(100);unclassified(100);	0	1	0	0	0	0	0	0	0	0	1
Otu001961	Bacteria(100);Firmicutes(100);Clostridia(100);Clostridiales(100);unclassified(100);unclassified(100);	0	0	0	0	0	0	0	0	0	1	0
Otu001963	Bacteria(100);Firmicutes(100);Erysipelotrichia(100);Erysipelotrichales(100);Erysipelotrichaceae(100);Catenibacterium(100);	0	0	0	1	0	0	0	0	0	0	0
Otu001965	Bacteria(100);Firmicutes(100);Clostridia(100);Clostridiales(100);Ruminococcaceae(100);unclassified(100);	0	0	0	1	0	0	0	0	0	0	0
Otu001966	Bacteria(100);Firmicutes(100);Clostridia(100);Clostridiales(100);Ruminococcaceae(100);unclassified(100);	0	0	0	0	0	1	0	0	0	0	0
Otu001976	Bacteria(100);Firmicutes(100);Negativicutes(100);Selenomonadales(100);Veillonellaceae(100);unclassified(100);	0	0	0	0	0	0	0	1	0	0	0
Otu001983	Bacteria(100);Bacteroidetes(100);Bacteroidia(100);Bacteroidales(100);Porphyromonadaceae(100);Parabacteroides(100);	0	0	0	0	0	0	0	0	1	0	0
Otu001985	Bacteria(100);Firmicutes(100);Clostridia(100);Clostridiales(100);unclassified(100);unclassified(100);	0	0	0	0	0	0	0	1	0	0	0
Otu001993	Bacteria(100);Firmicutes(100);Bacilli(100);Lactobacillales(100);Carnobacteriaceae(100);Carnobacterium(100);	0	0	0	0	0	0	0	0	0	0	2
Otu001995	Bacteria(100);Firmicutes(100);Clostridia(100);Clostridiales(100);Ruminococcaceae(100);Incertae_Sedis(100);	0	0	0	0	1	0	0	0	0	0	0
Otu002013	Bacteria(100);unclassified(100);unclassified(100);unclassified(100);unclassified(100);unclassified(100);	0	0	0	0	0	0	1	0	0	0	0
Otu002022	Bacteria(100);Firmicutes(100);Clostridia(100);Clostridiales(100);Ruminococcaceae(100);Subdoligranulum(100);	0	0	0	0	0	0	1	0	0	0	0
Otu002025	Bacteria(100);Firmicutes(100);Clostridia(100);Clostridiales(100);Ruminococcaceae(100);Incertae_Sedis(100);	0	0	1	0	0	0	0	0	0	0	0
Otu002042	Bacteria(100);unclassified(100);unclassified(100);unclassified(100);unclassified(100);unclassified(100);	0	0	0	0	0	0	0	0	0	1	1
Otu002049	Bacteria(100);Firmicutes(100);Clostridia(100);Clostridiales(100);Lachnospiraceae(100);Incertae_Sedis(100);	0	0	0	1	0	0	0	0	0	0	0
Otu002055	Bacteria(100);Actinobacteria(100);Actinobacteria(100);Bifidobacteriales(100);Bifidobacteriaceae(100);unclassified(100);	0	0	0	0	1	0	0	0	0	0	0
Otu002069	Bacteria(100);Firmicutes(100);Clostridia(100);Clostridiales(100);unclassified(100);unclassified(100);	0	1	0	0	0	0	0	0	0	0	0
Otu002075	Bacteria(100);Firmicutes(100);Clostridia(100);Clostridiales(100);Lachnospiraceae(100);unclassified(100);	0	0	0	0	0	0	0	0	0	0	1
Otu002079	Bacteria(100);Firmicutes(100);Clostridia(100);Clostridiales(100);Lachnospiraceae(100);unclassified(100);	0	0	0	0	0	0	0	0	0	1	0
Otu002087	Bacteria(100);unclassified(100);unclassified(100);unclassified(100);unclassified(100);unclassified(100);	0	0	0	0	1	0	0	0	0	0	0
Otu002094	Bacteria(100);Firmicutes(100);Clostridia(100);Clostridiales(100);Lachnospiraceae(100);unclassified(100);	0	0	0	0	0	0	0	0	0	1	0
Otu002108	Bacteria(100);Firmicutes(100);Clostridia(100);Clostridiales(100);unclassified(100);unclassified(100);	0	0	0	0	1	0	0	0	0	0	0
Otu002112	Bacteria(100);Firmicutes(100);Clostridia(100);Clostridiales(100);Ruminococcaceae(100);Faecalibacterium(100);	0	0	0	1	0	0	0	0	1	0	0
Otu002117	Bacteria(100);unclassified(100);unclassified(100);unclassified(100);unclassified(100);unclassified(100);	0	0	0	0	0	0	0	1	0	0	0
Otu002131	Bacteria(100);Firmicutes(100);unclassified(100);unclassified(100);unclassified(100);unclassified(100);	0	0	0	0	0	0	0	1	0	0	0
Otu002135	Bacteria(100);Firmicutes(100);unclassified(100);unclassified(100);unclassified(100);unclassified(100);	0	0	0	0	1	0	0	0	0	0	0
Otu002136	Bacteria(100);Firmicutes(100);Clostridia(100);Clostridiales(100);Lachnospiraceae(100);unclassified(100);	0	0	0	0	0	0	0	0	0	1	0
Otu002144	Bacteria(100);Firmicutes(100);Clostridia(100);Clostridiales(100);unclassified(100);unclassified(100);	0	0	0	0	0	1	0	0	0	0	0
Otu002145	Bacteria(100);Firmicutes(100);Clostridia(100);Clostridiales(100);Clostridiaceae_1(100);unclassified(100);	0	0	0	0	1	0	0	0	0	0	0
Otu002151	Bacteria(100);unclassified(100);unclassified(100);unclassified(100);unclassified(100);unclassified(100);	0	0	0	0	0	0	0	0	0	1	0
Otu002152	Bacteria(100);Firmicutes(100);Clostridia(100);Clostridiales(100);unclassified(100);unclassified(100);	0	0	0	0	0	0	0	0	0	0	1
Otu002157	Bacteria(100);Firmicutes(100);Clostridia(100);Clostridiales(100);vadinBB60(100);unclassified(100);	1	0	0	0	0	0	0	0	0	0	0
Otu002160	Bacteria(100);Firmicutes(100);Clostridia(100);Clostridiales(100);Ruminococcaceae(100);Faecalibacterium(100);	0	0	0	0	0	0	0	1	0	0	0
Otu002168	Bacteria(100);Bacteroidetes(100);Bacteroidia(100);Bacteroidales(100);unclassified(100);unclassified(100);	0	0	0	0	0	0	0	0	1	0	0
Otu002180	Bacteria(100);Bacteroidetes(100);Bacteroidia(100);Bacteroidales(100);Porphyromonadaceae(100);Parabacteroides(100);	0	0	0	0	0	0	0	0	1	0	0
Otu002183	Bacteria(100);Firmicutes(100);Clostridia(100);Clostridiales(100);Ruminococcaceae(100);unclassified(100);	0	0	0	0	0	0	0	0	0	1	0
Otu002196	Bacteria(100);Firmicutes(100);unclassified(100);unclassified(100);unclassified(100);unclassified(100);	0	0	0	0	0	0	0	0	0	1	0
Otu002202	Bacteria(100);Firmicutes(100);Clostridia(100);Clostridiales(100);Ruminococcaceae(100);unclassified(100);	0	0	0	0	0	0	0	0	0	1	0
Otu002206	Bacteria(100);Firmicutes(100);unclassified(100);unclassified(100);unclassified(100);unclassified(100);	0	0	1	0	0	0	0	0	0	0	0
Otu002208	Bacteria(100);Actinobacteria(100);Actinobacteria(100);Bifidobacteriales(100);Bifidobacteriaceae(100);Bifidobacterium(100);	0	1	0	0	0	0	0	0	0	0	0
Otu002209	Bacteria(100);Bacteroidetes(100);Bacteroidia(100);Bacteroidales(100);unclassified(100);unclassified(100);	1	0	0	0	0	0	0	0	0	0	0
Otu002224	Bacteria(100);Firmicutes(100);Clostridia(100);Clostridiales(100);Ruminococcaceae(100);Faecalibacterium(100);	1	0	0	0	0	0	0	0	0	0	0
Otu002228	Bacteria(100);Firmicutes(100);Clostridia(100);Clostridiales(100);Lachnospiraceae(100);unclassified(100);	0	0	0	0	0	0	1	0	0	0	0
Otu002236	Bacteria(100);Firmicutes(100);Clostridia(100);Clostridiales(100);Ruminococcaceae(100);unclassified(100);	0	0	0	0	0	0	0	1	0	0	0
Otu002239	Bacteria(100);unclassified(100);unclassified(100);unclassified(100);unclassified(100);unclassified(100);	0	0	1	0	0	0	0	0	0	0	0
Otu002250	Bacteria(100);Firmicutes(100);Clostridia(100);Clostridiales(100);Ruminococcaceae(100);unclassified(100);	0	0	0	0	0	0	0	1	0	0	0
Otu002279	Bacteria(100);Firmicutes(100);Clostridia(100);Clostridiales(100);Ruminococcaceae(100);Ruminococcus(100);	0	0	0	0	0	0	1	0	0	0	0
Otu002292	Bacteria(100);Bacteroidetes(100);Bacteroidia(100);Bacteroidales(100);Bacteroidaceae(100);Bacteroides(100);	0	0	0	0	0	0	1	0	0	0	0
Otu002296	Bacteria(100);Firmicutes(100);unclassified(100);unclassified(100);unclassified(100);unclassified(100);	0	0	0	0	0	0	0	0	0	0	1
Otu002312	Bacteria(100);Firmicutes(100);Clostridia(100);Clostridiales(100);Lachnospiraceae(100);unclassified(100);	0	0	0	0	0	1	0	0	0	0	0
Otu002326	Bacteria(100);Firmicutes(100);Clostridia(100);Clostridiales(100);Ruminococcaceae(100);Faecalibacterium(100);	0	0	0	1	0	0	0	0	0	0	0
Otu002345	Bacteria(100);Proteobacteria(100);Betaproteobacteria(100);Burkholderiales(100);unclassified(100);unclassified(100);	0	0	0	0	0	0	0	1	0	0	0
Otu002350	Bacteria(100);Firmicutes(100);Clostridia(100);Clostridiales(100);Lachnospiraceae(100);Dorea(100);	0	0	0	0	1	0	0	0	0	0	0
Otu002355	Bacteria(100);Bacteroidetes(100);Bacteroidia(100);Bacteroidales(100);Porphyromonadaceae(100);Parabacteroides(100);	0	0	0	0	0	0	1	0	0	0	0
Otu002356	Bacteria(100);Actinobacteria(100);Actinobacteria(100);Bifidobacteriales(100);Bifidobacteriaceae(100);unclassified(100);	0	0	1	0	0	0	0	0	0	0	0
Otu002378	Bacteria(100);Firmicutes(100);Clostridia(100);Clostridiales(100);Lachnospiraceae(100);Coprococcus(100);	0	0	0	0	0	0	0	1	0	0	0
Otu002381	Bacteria(100);Bacteroidetes(100);Bacteroidia(100);Bacteroidales(100);Prevotellaceae(100);Prevotella(100);	0	0	0	0	0	0	0	0	1	0	0
Otu002385	Bacteria(100);unclassified(100);unclassified(100);unclassified(100);unclassified(100);unclassified(100);	0	0	1	0	0	0	0	0	0	0	0
Otu002397	Bacteria(100);Firmicutes(100);Clostridia(100);Clostridiales(100);Ruminococcaceae(100);unclassified(100);	0	0	0	0	0	0	0	0	0	1	0
Otu002399	Bacteria(100);Firmicutes(100);Clostridia(100);Clostridiales(100);Ruminococcaceae(100);unclassified(100);	0	0	0	0	0	0	0	0	0	1	0
Otu002402	Bacteria(100);Bacteroidetes(100);Bacteroidia(100);Bacteroidales(100);unclassified(100);unclassified(100);	0	0	0	0	0	1	0	0	0	0	0
Otu002433	Bacteria(100);Firmicutes(100);Clostridia(100);Clostridiales(100);unclassified(100);unclassified(100);	1	0	0	0	0	0	0	0	0	0	0
Otu002436	Bacteria(100);Bacteroidetes(100);Bacteroidia(100);Bacteroidales(100);unclassified(100);unclassified(100);	0	0	0	0	0	0	0	1	0	0	0
Otu002465	Bacteria(100);Actinobacteria(100);Actinobacteria(100);Bifidobacteriales(100);Bifidobacteriaceae(100);Bifidobacterium(100);	0	0	0	0	0	0	0	0	0	0	1
Otu002466	Bacteria(100);unclassified(100);unclassified(100);unclassified(100);unclassified(100);unclassified(100);	0	0	0	0	0	1	0	0	0	0	0
Otu002470	Bacteria(100);Firmicutes(100);Clostridia(100);Clostridiales(100);Ruminococcaceae(100);Ruminococcus(100);	0	0	0	0	0	0	1	0	0	0	0
Otu002473	Bacteria(100);Proteobacteria(100);Gammaproteobacteria(100);Enterobacteriales(100);Enterobacteriaceae(100);Hafnia(100);	0	0	0	0	0	0	0	0	0	0	1
Otu002488	Bacteria(100);Firmicutes(100);Negativicutes(100);Selenomonadales(100);Veillonellaceae(100);Dialister(100);	1	0	0	0	0	0	0	0	0	0	0
Otu002491	Bacteria(100);Firmicutes(100);Clostridia(100);Clostridiales(100);Lachnospiraceae(100);Roseburia(100);	0	0	0	0	0	0	1	0	0	0	0
Otu002494	Bacteria(100);Actinobacteria(100);Coriobacteriia(100);Coriobacteriales(100);Coriobacteriaceae(100);unclassified(100);	0	0	1	0	0	0	0	0	0	0	0
Otu002496	Bacteria(100);unclassified(100);unclassified(100);unclassified(100);unclassified(100);unclassified(100);	0	0	0	0	0	0	0	0	1	0	0
Otu002506	Bacteria(100);Firmicutes(100);Clostridia(100);Clostridiales(100);Defluviitaleaceae(100);Incertae_Sedis(100);	0	0	0	1	0	0	0	0	0	0	0
Otu002508	Bacteria(100);unclassified(100);unclassified(100);unclassified(100);unclassified(100);unclassified(100);	0	0	1	0	0	0	0	0	0	0	0
Otu002514	Bacteria(100);Bacteroidetes(100);unclassified(100);unclassified(100);unclassified(100);unclassified(100);	0	0	0	0	0	1	0	0	0	0	0
Otu002515	Bacteria(100);Firmicutes(100);Clostridia(100);Clostridiales(100);Lachnospiraceae(100);Lachnospira(100);	0	0	0	0	0	1	0	0	0	0	0
Otu002552	Bacteria(100);unclassified(100);unclassified(100);unclassified(100);unclassified(100);unclassified(100);	0	0	0	0	0	0	0	0	1	0	0
Otu002559	Bacteria(100);Firmicutes(100);Clostridia(100);Clostridiales(100);Lachnospiraceae(100);unclassified(100);	1	0	0	0	1	0	0	0	0	0	0
Otu002567	Bacteria(100);Firmicutes(100);unclassified(100);unclassified(100);unclassified(100);unclassified(100);	0	0	0	0	0	0	0	0	0	0	1
Otu002568	Bacteria(100);Firmicutes(100);Clostridia(100);Clostridiales(100);Lachnospiraceae(100);unclassified(100);	0	0	0	0	0	0	0	0	0	0	1
Otu002571	Bacteria(100);Firmicutes(100);Clostridia(100);Clostridiales(100);Ruminococcaceae(100);unclassified(100);	0	0	0	0	0	0	0	1	0	0	0
Otu013663	Bacteria(100);unclassified(100);unclassified(100);unclassified(100);unclassified(100);unclassified(100);	0	0	0	0	0	0	0	1	0	0	0
Otu013666	Bacteria(100);unclassified(100);unclassified(100);unclassified(100);unclassified(100);unclassified(100);	0	0	0	0	0	0	0	1	0	0	0
Otu013668	Bacteria(100);Firmicutes(100);Clostridia(100);Clostridiales(100);Lachnospiraceae(100);unclassified(100);	0	0	0	0	0	0	0	1	0	0	0
Otu013670	Bacteria(100);unclassified(100);unclassified(100);unclassified(100);unclassified(100);unclassified(100);	0	0	0	0	0	0	0	1	0	0	0
Otu013671	Bacteria(100);unclassified(100);unclassified(100);unclassified(100);unclassified(100);unclassified(100);	0	0	0	0	0	0	0	1	0	0	0
Otu013672	Bacteria(100);Bacteroidetes(100);Bacteroidia(100);Bacteroidales(100);unclassified(100);unclassified(100);	0	0	0	0	0	0	0	1	0	0	0
Otu013675	Bacteria(100);Firmicutes(100);Clostridia(100);Clostridiales(100);Lachnospiraceae(100);unclassified(100);	0	0	0	0	0	0	0	1	0	0	0
Otu013676	Bacteria(100);Firmicutes(100);unclassified(100);unclassified(100);unclassified(100);unclassified(100);	0	0	0	0	0	0	0	1	0	0	0
Otu013677	Bacteria(100);Bacteroidetes(100);Bacteroidia(100);Bacteroidales(100);Prevotellaceae(100);Alloprevotella(100);	0	0	0	0	0	0	0	1	0	0	0
Otu013679	Bacteria(100);Bacteroidetes(100);Bacteroidia(100);Bacteroidales(100);unclassified(100);unclassified(100);	0	0	0	0	0	0	0	1	0	0	0
Otu013680	Bacteria(100);unclassified(100);unclassified(100);unclassified(100);unclassified(100);unclassified(100);	0	0	0	0	0	0	0	1	0	0	0
Otu013681	Bacteria(100);Firmicutes(100);Clostridia(100);Clostridiales(100);Lachnospiraceae(100);unclassified(100);	0	0	0	0	0	0	0	1	0	0	0
Otu013682	Bacteria(100);Bacteroidetes(100);Bacteroidia(100);Bacteroidales(100);Porphyromonadaceae(100);Parabacteroides(100);	0	0	0	0	0	0	0	1	0	0	0
Otu013684	Bacteria(100);Firmicutes(100);Clostridia(100);Clostridiales(100);unclassified(100);unclassified(100);	0	0	0	0	0	0	0	1	0	0	0
Otu013686	Bacteria(100);Bacteroidetes(100);Bacteroidia(100);Bacteroidales(100);unclassified(100);unclassified(100);	0	0	0	0	0	0	0	1	0	0	0
Otu013693	Bacteria(100);Bacteroidetes(100);Bacteroidia(100);Bacteroidales(100);unclassified(100);unclassified(100);	0	0	0	0	0	0	0	1	0	0	0
Otu013695	Bacteria(100);Firmicutes(100);Negativicutes(100);Selenomonadales(100);Acidaminococcaceae(100);Phascolarctobacterium(100);	0	0	0	0	0	0	0	1	0	0	0
Otu013698	Bacteria(100);Firmicutes(100);Negativicutes(100);Selenomonadales(100);Veillonellaceae(100);unclassified(100);	0	0	0	0	0	0	0	1	0	0	0
Otu013699	Bacteria(100);Firmicutes(100);Clostridia(100);Clostridiales(100);unclassified(100);unclassified(100);	0	0	0	0	0	0	0	1	0	0	0
Otu013700	Bacteria(100);unclassified(100);unclassified(100);unclassified(100);unclassified(100);unclassified(100);	0	0	0	0	0	0	0	1	0	0	0
Otu013705	Bacteria(100);unclassified(100);unclassified(100);unclassified(100);unclassified(100);unclassified(100);	0	0	0	0	0	0	0	1	0	0	0
Otu013707	Bacteria(100);Tenericutes(100);Mollicutes(100);RF9(100);unclassified(100);unclassified(100);	0	0	0	0	0	0	0	1	0	0	0
Otu013709	Bacteria(100);Firmicutes(100);Clostridia(100);Clostridiales(100);Lachnospiraceae(100);unclassified(100);	0	0	0	0	0	0	0	1	0	0	0
Otu013711	Bacteria(100);Firmicutes(100);Clostridia(100);Clostridiales(100);Lachnospiraceae(100);unclassified(100);	0	0	0	0	0	0	0	1	0	0	0
Otu013716	Bacteria(100);Firmicutes(100);Clostridia(100);Clostridiales(100);Ruminococcaceae(100);unclassified(100);	0	0	0	0	0	0	0	1	0	0	0
Otu013717	Bacteria(100);Firmicutes(100);Clostridia(100);Clostridiales(100);unclassified(100);unclassified(100);	0	0	0	0	0	0	0	1	0	0	0
Otu013719	Bacteria(100);Firmicutes(100);Clostridia(100);Clostridiales(100);Lachnospiraceae(100);unclassified(100);	0	0	0	0	0	0	0	1	0	0	0
Otu013721	Bacteria(100);unclassified(100);unclassified(100);unclassified(100);unclassified(100);unclassified(100);	0	0	0	0	0	0	0	1	0	0	0
Otu013723	Bacteria(100);Firmicutes(100);Clostridia(100);unclassified(100);unclassified(100);unclassified(100);	0	0	0	0	0	0	0	1	0	0	0
Otu013730	Bacteria(100);unclassified(100);unclassified(100);unclassified(100);unclassified(100);unclassified(100);	0	0	0	0	0	0	0	1	0	0	0
Otu013731	Bacteria(100);Firmicutes(100);Clostridia(100);Clostridiales(100);Lachnospiraceae(100);unclassified(100);	0	0	0	0	0	0	0	1	0	0	0
Otu013732	Bacteria(100);Verrucomicrobia(100);Verrucomicrobiae(100);Verrucomicrobiales(100);Verrucomicrobiaceae(100);Akkermansia(100);	0	0	0	0	0	0	0	1	0	0	0
Otu013733	Bacteria(100);Firmicutes(100);Clostridia(100);Clostridiales(100);Ruminococcaceae(100);unclassified(100);	0	0	0	0	0	0	0	1	0	0	0
Otu013736	Bacteria(100);unclassified(100);unclassified(100);unclassified(100);unclassified(100);unclassified(100);	0	0	0	0	0	0	0	1	0	0	0
Otu013737	Bacteria(100);Bacteroidetes(100);Bacteroidia(100);Bacteroidales(100);unclassified(100);unclassified(100);	0	0	0	0	0	0	0	1	0	0	0
Otu013740	Bacteria(100);unclassified(100);unclassified(100);unclassified(100);unclassified(100);unclassified(100);	0	0	0	0	0	0	0	1	0	0	0
Otu013741	Bacteria(100);Firmicutes(100);Clostridia(100);Clostridiales(100);Ruminococcaceae(100);unclassified(100);	0	0	0	0	0	0	0	1	0	0	0
Otu013744	Bacteria(100);Firmicutes(100);Clostridia(100);Clostridiales(100);Lachnospiraceae(100);unclassified(100);	0	0	0	0	0	0	0	1	0	0	0
Otu013745	Bacteria(100);Firmicutes(100);Clostridia(100);Clostridiales(100);Lachnospiraceae(100);unclassified(100);	0	0	0	0	0	0	0	1	0	0	0
Otu013746	Bacteria(100);Bacteroidetes(100);Bacteroidia(100);Bacteroidales(100);unclassified(100);unclassified(100);	0	0	0	0	0	0	0	1	0	0	0
Otu013747	Bacteria(100);Firmicutes(100);Clostridia(100);Clostridiales(100);Ruminococcaceae(100);unclassified(100);	0	0	0	0	0	0	0	1	0	0	0
Otu013748	Bacteria(100);Firmicutes(100);Clostridia(100);Clostridiales(100);Lachnospiraceae(100);unclassified(100);	0	0	0	0	0	0	0	1	0	0	0
Otu013750	Bacteria(100);Firmicutes(100);Clostridia(100);Clostridiales(100);vadinBB60(100);unclassified(100);	0	0	0	0	0	0	0	1	0	0	0
Otu013751	Bacteria(100);unclassified(100);unclassified(100);unclassified(100);unclassified(100);unclassified(100);	0	0	0	0	0	0	0	1	0	0	0
Otu013752	Bacteria(100);Bacteroidetes(100);Bacteroidia(100);Bacteroidales(100);unclassified(100);unclassified(100);	0	0	0	0	0	0	0	1	0	0	0
Otu013755	Bacteria(100);unclassified(100);unclassified(100);unclassified(100);unclassified(100);unclassified(100);	0	0	0	0	0	0	0	1	0	0	0
Otu013756	Bacteria(100);Bacteroidetes(100);unclassified(100);unclassified(100);unclassified(100);unclassified(100);	0	0	0	0	0	0	0	1	0	0	0
Otu013757	Bacteria(100);Firmicutes(100);Clostridia(100);Clostridiales(100);Ruminococcaceae(100);unclassified(100);	0	0	0	0	0	0	0	1	0	0	0
Otu013758	Bacteria(100);Firmicutes(100);Clostridia(100);Clostridiales(100);Lachnospiraceae(100);Lachnospira(100);	0	0	0	0	0	0	0	1	0	0	0
Otu013759	Bacteria(100);unclassified(100);unclassified(100);unclassified(100);unclassified(100);unclassified(100);	0	0	0	0	0	0	0	1	0	0	0
Otu013763	Bacteria(100);Firmicutes(100);Clostridia(100);Clostridiales(100);Lachnospiraceae(100);Roseburia(100);	0	0	0	0	0	0	0	1	0	0	0
Otu013764	Bacteria(100);Bacteroidetes(100);Bacteroidia(100);Bacteroidales(100);unclassified(100);unclassified(100);	0	0	0	0	0	0	0	1	0	0	0
Otu013769	Bacteria(100);Firmicutes(100);Negativicutes(100);Selenomonadales(100);Veillonellaceae(100);unclassified(100);	0	0	0	0	0	0	0	1	0	0	0
Otu013773	Bacteria(100);Firmicutes(100);Negativicutes(100);Selenomonadales(100);Veillonellaceae(100);Veillonella(100);	0	0	0	0	0	0	0	1	0	0	0
Otu013774	Bacteria(100);unclassified(100);unclassified(100);unclassified(100);unclassified(100);unclassified(100);	0	0	0	0	0	0	0	1	0	0	0
Otu013775	Bacteria(100);Firmicutes(100);Clostridia(100);Clostridiales(100);unclassified(100);unclassified(100);	0	0	0	0	0	0	0	1	0	0	0
Otu013776	Bacteria(100);unclassified(100);unclassified(100);unclassified(100);unclassified(100);unclassified(100);	0	0	0	0	0	0	0	1	0	0	0
Otu013777	Bacteria(100);unclassified(100);unclassified(100);unclassified(100);unclassified(100);unclassified(100);	0	0	0	0	0	0	0	1	0	0	0
Otu013779	Bacteria(100);unclassified(100);unclassified(100);unclassified(100);unclassified(100);unclassified(100);	0	0	0	0	0	0	0	1	0	0	0
Otu013781	Bacteria(100);unclassified(100);unclassified(100);unclassified(100);unclassified(100);unclassified(100);	0	0	0	0	0	0	0	1	0	0	0
Otu013782	Bacteria(100);Firmicutes(100);Clostridia(100);Clostridiales(100);Ruminococcaceae(100);unclassified(100);	0	0	0	0	0	0	0	1	0	0	0
Otu013784	Bacteria(100);Bacteroidetes(100);unclassified(100);unclassified(100);unclassified(100);unclassified(100);	0	0	0	0	0	0	0	1	0	0	0
Otu013785	Bacteria(100);Firmicutes(100);Negativicutes(100);Selenomonadales(100);Veillonellaceae(100);unclassified(100);	0	0	0	0	0	0	0	1	0	0	0
Otu013787	Bacteria(100);unclassified(100);unclassified(100);unclassified(100);unclassified(100);unclassified(100);	0	0	0	0	0	0	0	1	0	0	0
Otu013790	Bacteria(100);unclassified(100);unclassified(100);unclassified(100);unclassified(100);unclassified(100);	0	0	0	0	0	0	0	1	0	0	0
Otu013792	Bacteria(100);Bacteroidetes(100);Bacteroidia(100);Bacteroidales(100);unclassified(100);unclassified(100);	0	0	0	0	0	0	0	1	0	0	0
Otu013794	Bacteria(100);Firmicutes(100);Clostridia(100);Clostridiales(100);Lachnospiraceae(100);Incertae_Sedis(100);	0	0	0	0	0	0	0	1	0	0	0
Otu013795	Bacteria(100);unclassified(100);unclassified(100);unclassified(100);unclassified(100);unclassified(100);	0	0	0	0	0	0	0	1	0	0	0
Otu013799	Bacteria(100);Firmicutes(100);Clostridia(100);Clostridiales(100);Lachnospiraceae(100);unclassified(100);	0	0	0	0	0	0	0	1	0	0	0
Otu013800	Bacteria(100);Firmicutes(100);Clostridia(100);Clostridiales(100);Lachnospiraceae(100);unclassified(100);	0	0	0	0	0	0	0	1	0	0	0
Otu013802	Bacteria(100);Bacteroidetes(100);Bacteroidia(100);Bacteroidales(100);Prevotellaceae(100);Prevotella(100);	0	0	0	0	0	0	0	1	0	0	0
Otu013805	Bacteria(100);Proteobacteria(100);Betaproteobacteria(100);unclassified(100);unclassified(100);unclassified(100);	0	0	0	0	0	0	0	1	0	0	0
Otu013807	Bacteria(100);unclassified(100);unclassified(100);unclassified(100);unclassified(100);unclassified(100);	0	0	0	0	0	0	0	1	0	0	0
Otu013808	Bacteria(100);Bacteroidetes(100);Bacteroidia(100);Bacteroidales(100);ratAN060301C(100);unclassified(100);	0	0	0	0	0	0	0	1	0	0	0
Otu013810	Bacteria(100);Bacteroidetes(100);Bacteroidia(100);Bacteroidales(100);Prevotellaceae(100);unclassified(100);	0	0	0	0	0	0	0	1	0	0	0
Otu013811	Bacteria(100);unclassified(100);unclassified(100);unclassified(100);unclassified(100);unclassified(100);	0	0	0	0	0	0	0	1	0	0	0
Otu013813	Bacteria(100);Firmicutes(100);Negativicutes(100);Selenomonadales(100);Veillonellaceae(100);unclassified(100);	0	0	0	0	0	0	0	1	0	0	0
Otu013816	Bacteria(100);Firmicutes(100);Clostridia(100);Clostridiales(100);Lachnospiraceae(100);unclassified(100);	0	0	0	0	0	0	0	1	0	0	0
Otu013817	Bacteria(100);Bacteroidetes(100);Bacteroidia(100);Bacteroidales(100);unclassified(100);unclassified(100);	0	0	0	0	0	0	0	1	0	0	0
Otu013820	Bacteria(100);Firmicutes(100);Clostridia(100);Clostridiales(100);Ruminococcaceae(100);Ruminococcus(100);	0	0	0	0	0	0	0	1	0	0	0
Otu013821	Bacteria(100);Bacteroidetes(100);Bacteroidia(100);Bacteroidales(100);Porphyromonadaceae(100);Coprobacter(100);	0	0	0	0	0	0	0	1	0	0	0
Otu013822	Bacteria(100);Firmicutes(100);Clostridia(100);Clostridiales(100);Lachnospiraceae(100);unclassified(100);	0	0	0	0	0	0	0	1	0	0	0
Otu013823	Bacteria(100);Firmicutes(100);Bacilli(100);unclassified(100);unclassified(100);unclassified(100);	0	0	0	0	0	0	0	1	0	0	0
Otu013825	Bacteria(100);Firmicutes(100);Clostridia(100);Clostridiales(100);Lachnospiraceae(100);unclassified(100);	0	0	0	0	0	0	0	1	0	0	0
Otu013830	Bacteria(100);Firmicutes(100);Clostridia(100);Clostridiales(100);Lachnospiraceae(100);unclassified(100);	0	0	0	0	0	0	0	1	0	0	0
Otu013831	Bacteria(100);Firmicutes(100);Clostridia(100);Clostridiales(100);Lachnospiraceae(100);unclassified(100);	0	0	0	0	0	0	0	1	0	0	0
Otu013834	Bacteria(100);unclassified(100);unclassified(100);unclassified(100);unclassified(100);unclassified(100);	0	0	0	0	0	0	0	1	0	0	0
Otu013835	Bacteria(100);unclassified(100);unclassified(100);unclassified(100);unclassified(100);unclassified(100);	0	0	0	0	0	0	0	1	0	0	0
Otu013836	Bacteria(100);Firmicutes(100);Clostridia(100);Clostridiales(100);Lachnospiraceae(100);Roseburia(100);	0	0	0	0	0	0	0	1	0	0	0
Otu013839	Bacteria(100);Firmicutes(100);Clostridia(100);Clostridiales(100);unclassified(100);unclassified(100);	0	0	0	0	0	0	0	1	0	0	0
Otu013843	Bacteria(100);unclassified(100);unclassified(100);unclassified(100);unclassified(100);unclassified(100);	0	0	0	0	0	0	0	1	0	0	0
Otu013851	Bacteria(100);Firmicutes(100);Negativicutes(100);Selenomonadales(100);Veillonellaceae(100);unclassified(100);	0	0	0	0	0	0	0	1	0	0	0
Otu013852	Bacteria(100);Bacteroidetes(100);Bacteroidia(100);Bacteroidales(100);unclassified(100);unclassified(100);	0	0	0	0	0	0	0	1	0	0	0
Otu013854	Bacteria(100);unclassified(100);unclassified(100);unclassified(100);unclassified(100);unclassified(100);	0	0	0	0	0	0	0	1	0	0	0
Otu013855	Bacteria(100);Bacteroidetes(100);Bacteroidia(100);Bacteroidales(100);unclassified(100);unclassified(100);	0	0	0	0	0	0	0	1	0	0	0
Otu013860	Bacteria(100);Firmicutes(100);Clostridia(100);Clostridiales(100);Ruminococcaceae(100);unclassified(100);	0	0	0	0	0	0	0	1	0	0	0
Otu013862	Bacteria(100);Firmicutes(100);Clostridia(100);Clostridiales(100);Lachnospiraceae(100);Lachnospira(100);	0	0	0	0	0	0	0	1	0	0	0
Otu013863	Bacteria(100);Bacteroidetes(100);Bacteroidia(100);Bacteroidales(100);unclassified(100);unclassified(100);	0	0	0	0	0	0	0	1	0	0	0
Otu013865	Bacteria(100);Bacteroidetes(100);Bacteroidia(100);Bacteroidales(100);unclassified(100);unclassified(100);	0	0	0	0	0	0	0	1	0	0	0
Otu013866	Bacteria(100);Bacteroidetes(100);unclassified(100);unclassified(100);unclassified(100);unclassified(100);	0	0	0	0	0	0	0	1	0	0	0
Otu013867	Bacteria(100);Firmicutes(100);Clostridia(100);Clostridiales(100);Ruminococcaceae(100);Ruminococcus(100);	0	0	0	0	0	0	0	1	0	0	0
Otu013869	Bacteria(100);unclassified(100);unclassified(100);unclassified(100);unclassified(100);unclassified(100);	0	0	0	0	0	0	0	1	0	0	0
Otu013873	Bacteria(100);Firmicutes(100);Clostridia(100);Clostridiales(100);unclassified(100);unclassified(100);	0	0	0	0	0	0	0	1	0	0	0
Otu013876	Bacteria(100);Bacteroidetes(100);Bacteroidia(100);Bacteroidales(100);unclassified(100);unclassified(100);	0	0	0	0	0	0	0	1	0	0	0
Otu013877	Bacteria(100);unclassified(100);unclassified(100);unclassified(100);unclassified(100);unclassified(100);	0	0	0	0	0	0	0	1	0	0	0
Otu013878	Bacteria(100);Bacteroidetes(100);Bacteroidia(100);Bacteroidales(100);ratAN060301C(100);unclassified(100);	0	0	0	0	0	0	0	1	0	0	0
Otu013879	Bacteria(100);Firmicutes(100);Clostridia(100);Clostridiales(100);Ruminococcaceae(100);unclassified(100);	0	0	0	0	0	0	0	1	0	0	0
Otu013882	Bacteria(100);Firmicutes(100);Clostridia(100);Clostridiales(100);Lachnospiraceae(100);Lachnospira(100);	0	0	0	0	0	0	0	1	0	0	0
Otu013883	Bacteria(100);Firmicutes(100);Clostridia(100);Clostridiales(100);Christensenellaceae(100);unclassified(100);	0	0	0	0	0	0	0	1	0	0	0
Otu013886	Bacteria(100);Firmicutes(100);Clostridia(100);Clostridiales(100);Ruminococcaceae(100);unclassified(100);	0	0	0	0	0	0	0	1	0	0	0
Otu013888	Bacteria(100);Firmicutes(100);Clostridia(100);Clostridiales(100);Lachnospiraceae(100);unclassified(100);	0	0	0	0	0	0	0	1	0	0	0
Otu013891	Bacteria(100);Firmicutes(100);Clostridia(100);Clostridiales(100);Lachnospiraceae(100);unclassified(100);	0	0	0	0	0	0	0	1	0	0	0
Otu013892	Bacteria(100);Bacteroidetes(100);Bacteroidia(100);Bacteroidales(100);Porphyromonadaceae(100);Butyricimonas(100);	0	0	0	0	0	0	0	1	0	0	0
Otu013895	Bacteria(100);Firmicutes(100);Clostridia(100);Clostridiales(100);Lachnospiraceae(100);unclassified(100);	0	0	0	0	0	0	0	1	0	0	0
Otu013906	Bacteria(100);Bacteroidetes(100);Bacteroidia(100);Bacteroidales(100);Prevotellaceae(100);Prevotella(100);	0	0	0	0	0	0	0	1	0	0	0
Otu013907	Bacteria(100);unclassified(100);unclassified(100);unclassified(100);unclassified(100);unclassified(100);	0	0	0	0	0	0	0	1	0	0	0
Otu013908	Bacteria(100);unclassified(100);unclassified(100);unclassified(100);unclassified(100);unclassified(100);	0	0	0	0	0	0	0	1	0	0	0
Otu013909	Bacteria(100);Bacteroidetes(100);Bacteroidia(100);Bacteroidales(100);unclassified(100);unclassified(100);	0	0	0	0	0	0	0	1	0	0	0
Otu013911	Bacteria(100);unclassified(100);unclassified(100);unclassified(100);unclassified(100);unclassified(100);	0	0	0	0	0	0	0	1	0	0	0
Otu013912	Bacteria(100);Firmicutes(100);Clostridia(100);Clostridiales(100);Lachnospiraceae(100);unclassified(100);	0	0	0	0	0	0	0	1	0	0	0
Otu013913	Bacteria(100);Firmicutes(100);Clostridia(100);Clostridiales(100);Ruminococcaceae(100);unclassified(100);	0	0	0	0	0	0	0	1	0	0	0
Otu013917	Bacteria(100);Firmicutes(100);Clostridia(100);Clostridiales(100);Lachnospiraceae(100);Blautia(100);	0	0	0	0	0	0	0	1	0	0	0
Otu013918	Bacteria(100);Firmicutes(100);Clostridia(100);Clostridiales(100);Defluviitaleaceae(100);Incertae_Sedis(100);	0	0	0	0	0	0	0	1	0	0	0
Otu013920	Bacteria(100);Bacteroidetes(100);Bacteroidia(100);Bacteroidales(100);unclassified(100);unclassified(100);	0	0	0	0	0	0	0	1	0	0	0
Otu013921	Bacteria(100);Bacteroidetes(100);Bacteroidia(100);Bacteroidales(100);unclassified(100);unclassified(100);	0	0	0	0	0	0	0	1	0	0	0
Otu013922	Bacteria(100);Firmicutes(100);Clostridia(100);Clostridiales(100);unclassified(100);unclassified(100);	0	0	0	0	0	0	0	1	0	0	0
Otu013926	Bacteria(100);Bacteroidetes(100);Bacteroidia(100);Bacteroidales(100);unclassified(100);unclassified(100);	0	0	0	0	0	0	0	1	0	0	0
Otu013927	Bacteria(100);Bacteroidetes(100);Bacteroidia(100);Bacteroidales(100);unclassified(100);unclassified(100);	0	0	0	0	0	0	0	1	0	0	0
Otu013928	Bacteria(100);Bacteroidetes(100);unclassified(100);unclassified(100);unclassified(100);unclassified(100);	0	0	0	0	0	0	0	1	0	0	0
Otu013929	Bacteria(100);Firmicutes(100);Clostridia(100);Clostridiales(100);Lachnospiraceae(100);unclassified(100);	0	0	0	0	0	0	0	1	0	0	0
Otu013930	Bacteria(100);Actinobacteria(100);Actinobacteria(100);Bifidobacteriales(100);Bifidobacteriaceae(100);unclassified(100);	0	0	0	0	0	0	0	1	0	0	0
Otu013931	Bacteria(100);unclassified(100);unclassified(100);unclassified(100);unclassified(100);unclassified(100);	0	0	0	0	0	0	0	1	0	0	0
Otu013932	Bacteria(100);Firmicutes(100);Clostridia(100);Clostridiales(100);Lachnospiraceae(100);unclassified(100);	0	0	0	0	0	0	0	1	0	0	0
Otu013933	Bacteria(100);Actinobacteria(100);Coriobacteriia(100);Coriobacteriales(100);Coriobacteriaceae(100);Collinsella(100);	0	0	0	0	0	0	0	1	0	0	0
Otu013935	Bacteria(100);Bacteroidetes(100);Bacteroidia(100);Bacteroidales(100);Rikenellaceae(100);Alistipes(100);	0	0	0	0	0	0	0	1	0	0	0
Otu013936	Bacteria(100);Bacteroidetes(100);Bacteroidia(100);Bacteroidales(100);Bacteroidaceae(100);Bacteroides(100);	0	0	0	0	0	0	0	1	0	0	0
Otu013937	Bacteria(100);Bacteroidetes(100);Bacteroidia(100);Bacteroidales(100);Prevotellaceae(100);Prevotella(100);	0	0	0	0	0	0	0	1	0	0	0
Otu013938	Bacteria(100);Bacteroidetes(100);Bacteroidia(100);Bacteroidales(100);Rikenellaceae(100);Alistipes(100);	0	0	0	0	0	0	0	1	0	0	0
Otu013939	Bacteria(100);Firmicutes(100);Clostridia(100);Clostridiales(100);Ruminococcaceae(100);unclassified(100);	0	0	0	0	0	0	0	1	0	0	0
Otu013940	Bacteria(100);Firmicutes(100);Clostridia(100);Clostridiales(100);Lachnospiraceae(100);unclassified(100);	0	0	0	0	0	0	0	1	0	0	0
Otu013941	Bacteria(100);Firmicutes(100);Negativicutes(100);Selenomonadales(100);Veillonellaceae(100);unclassified(100);	0	0	0	0	0	0	0	1	0	0	0
Otu013942	Bacteria(100);Bacteroidetes(100);Bacteroidia(100);Bacteroidales(100);Porphyromonadaceae(100);Parabacteroides(100);	0	0	0	0	0	0	0	1	0	0	0
Otu013945	Bacteria(100);Bacteroidetes(100);unclassified(100);unclassified(100);unclassified(100);unclassified(100);	0	0	0	0	0	0	0	1	0	0	0
Otu013950	Bacteria(100);Bacteroidetes(100);Bacteroidia(100);Bacteroidales(100);Rikenellaceae(100);unclassified(100);	0	0	0	0	0	0	0	1	0	0	0
Otu013951	Bacteria(100);Bacteroidetes(100);unclassified(100);unclassified(100);unclassified(100);unclassified(100);	0	0	0	0	0	0	0	1	0	0	0
Otu013952	Bacteria(100);Bacteroidetes(100);unclassified(100);unclassified(100);unclassified(100);unclassified(100);	0	0	0	0	0	0	0	1	0	0	0
Otu013953	Bacteria(100);Firmicutes(100);Clostridia(100);Clostridiales(100);unclassified(100);unclassified(100);	0	0	0	0	0	0	0	1	0	0	0
Otu013955	Bacteria(100);Firmicutes(100);Clostridia(100);Clostridiales(100);Ruminococcaceae(100);Ruminococcus(100);	0	0	0	0	0	0	0	1	0	0	0
Otu013956	Bacteria(100);Firmicutes(100);Clostridia(100);Clostridiales(100);Lachnospiraceae(100);unclassified(100);	0	0	0	0	0	0	0	1	0	0	0
Otu013960	Bacteria(100);Bacteroidetes(100);Bacteroidia(100);Bacteroidales(100);Bacteroidaceae(100);Bacteroides(100);	0	0	0	0	0	0	0	1	0	0	0
Otu013963	Bacteria(100);Bacteroidetes(100);Bacteroidia(100);Bacteroidales(100);Rikenellaceae(100);Alistipes(100);	0	0	0	0	0	0	0	1	0	0	0
Otu013964	Bacteria(100);Bacteroidetes(100);Bacteroidia(100);Bacteroidales(100);unclassified(100);unclassified(100);	0	0	0	0	0	0	0	1	0	0	0
Otu013970	Bacteria(100);Bacteroidetes(100);Bacteroidia(100);Bacteroidales(100);Rikenellaceae(100);unclassified(100);	0	0	0	0	0	0	0	1	0	0	0
Otu013971	Bacteria(100);Firmicutes(100);Clostridia(100);Clostridiales(100);Ruminococcaceae(100);unclassified(100);	0	0	0	0	0	0	0	1	0	0	0
Otu013972	Bacteria(100);Firmicutes(100);Clostridia(100);Clostridiales(100);Lachnospiraceae(100);unclassified(100);	0	0	0	0	0	0	0	1	0	0	0
Otu013973	Bacteria(100);Verrucomicrobia(100);Verrucomicrobiae(100);Verrucomicrobiales(100);Verrucomicrobiaceae(100);Akkermansia(100);	0	0	0	0	0	0	0	1	0	0	0
Otu013974	Bacteria(100);Firmicutes(100);Clostridia(100);Clostridiales(100);Lachnospiraceae(100);unclassified(100);	0	0	0	0	0	0	0	1	0	0	0
Otu013977	Bacteria(100);Firmicutes(100);Clostridia(100);Clostridiales(100);unclassified(100);unclassified(100);	0	0	0	0	0	0	0	1	0	0	0
Otu013979	Bacteria(100);Firmicutes(100);Negativicutes(100);Selenomonadales(100);Veillonellaceae(100);unclassified(100);	0	0	0	0	0	0	0	1	0	0	0
Otu013981	Bacteria(100);Bacteroidetes(100);Bacteroidia(100);Bacteroidales(100);unclassified(100);unclassified(100);	0	0	0	0	0	0	0	1	0	0	0
Otu013983	Bacteria(100);unclassified(100);unclassified(100);unclassified(100);unclassified(100);unclassified(100);	0	0	0	0	0	0	0	1	0	0	0
Otu013984	Bacteria(100);Bacteroidetes(100);unclassified(100);unclassified(100);unclassified(100);unclassified(100);	0	0	0	0	0	0	0	1	0	0	0
Otu013985	Bacteria(100);Firmicutes(100);Negativicutes(100);Selenomonadales(100);Veillonellaceae(100);unclassified(100);	0	0	0	0	0	0	0	1	0	0	0
Otu013986	Bacteria(100);Firmicutes(100);Clostridia(100);Clostridiales(100);Lachnospiraceae(100);unclassified(100);	0	0	0	0	0	0	0	1	0	0	0
Otu013987	Bacteria(100);unclassified(100);unclassified(100);unclassified(100);unclassified(100);unclassified(100);	0	0	0	0	0	0	0	1	0	0	0
Otu013988	Bacteria(100);Bacteroidetes(100);Bacteroidia(100);Bacteroidales(100);unclassified(100);unclassified(100);	0	0	0	0	0	0	0	1	0	0	0
Otu013990	Bacteria(100);Firmicutes(100);Clostridia(100);Clostridiales(100);Ruminococcaceae(100);unclassified(100);	0	0	0	0	0	0	0	1	0	0	0
Otu013992	Bacteria(100);unclassified(100);unclassified(100);unclassified(100);unclassified(100);unclassified(100);	0	0	0	0	0	0	0	1	0	0	0
Otu013993	Bacteria(100);Firmicutes(100);Clostridia(100);Clostridiales(100);Lachnospiraceae(100);unclassified(100);	0	0	0	0	0	0	0	1	0	0	0
Otu013994	Bacteria(100);unclassified(100);unclassified(100);unclassified(100);unclassified(100);unclassified(100);	0	0	0	0	0	0	0	1	0	0	0
Otu013996	Bacteria(100);Firmicutes(100);Clostridia(100);Clostridiales(100);Lachnospiraceae(100);unclassified(100);	0	0	0	0	0	0	0	1	0	0	0
Otu013999	Bacteria(100);Bacteroidetes(100);Bacteroidia(100);Bacteroidales(100);unclassified(100);unclassified(100);	0	0	0	0	0	0	0	1	0	0	0
Otu014003	Bacteria(100);Firmicutes(100);Clostridia(100);Clostridiales(100);Lachnospiraceae(100);unclassified(100);	0	0	0	0	0	0	0	1	0	0	0
Otu014004	Bacteria(100);unclassified(100);unclassified(100);unclassified(100);unclassified(100);unclassified(100);	0	0	0	0	0	0	0	1	0	0	0
Otu014006	Bacteria(100);unclassified(100);unclassified(100);unclassified(100);unclassified(100);unclassified(100);	0	0	0	0	0	0	0	1	0	0	0
Otu014007	Bacteria(100);unclassified(100);unclassified(100);unclassified(100);unclassified(100);unclassified(100);	0	0	0	0	0	0	0	1	0	0	0
Otu014012	Bacteria(100);Bacteroidetes(100);unclassified(100);unclassified(100);unclassified(100);unclassified(100);	0	0	0	0	0	0	0	1	0	0	0
Otu014014	Bacteria(100);Firmicutes(100);Clostridia(100);Clostridiales(100);Ruminococcaceae(100);unclassified(100);	0	0	0	0	0	0	0	1	0	0	0
Otu014015	Bacteria(100);Firmicutes(100);Negativicutes(100);Selenomonadales(100);Veillonellaceae(100);unclassified(100);	0	0	0	0	0	0	0	1	0	0	0
Otu014017	Bacteria(100);Firmicutes(100);unclassified(100);unclassified(100);unclassified(100);unclassified(100);	0	0	0	0	0	0	0	1	0	0	0
Otu014018	Bacteria(100);unclassified(100);unclassified(100);unclassified(100);unclassified(100);unclassified(100);	0	0	0	0	0	0	0	1	0	0	0
Otu014020	Bacteria(100);Firmicutes(100);Clostridia(100);Clostridiales(100);Lachnospiraceae(100);unclassified(100);	0	0	0	0	0	0	0	1	0	0	0
Otu014023	Bacteria(100);Firmicutes(100);Clostridia(100);Clostridiales(100);Lachnospiraceae(100);unclassified(100);	0	0	0	0	0	0	0	1	0	0	0
Otu014025	Bacteria(100);Bacteroidetes(100);unclassified(100);unclassified(100);unclassified(100);unclassified(100);	0	0	0	0	0	0	0	1	0	0	0
Otu014027	Bacteria(100);Firmicutes(100);Clostridia(100);Clostridiales(100);Peptostreptococcaceae(100);unclassified(100);	0	0	0	0	0	0	0	1	0	0	0
Otu014028	Bacteria(100);Firmicutes(100);Clostridia(100);Clostridiales(100);Lachnospiraceae(100);unclassified(100);	0	0	0	0	0	0	0	1	0	0	0
Otu014029	Bacteria(100);Bacteroidetes(100);unclassified(100);unclassified(100);unclassified(100);unclassified(100);	0	0	0	0	0	0	0	1	0	0	0
Otu014030	Bacteria(100);unclassified(100);unclassified(100);unclassified(100);unclassified(100);unclassified(100);	0	0	0	0	0	0	0	1	0	0	0
Otu014031	Bacteria(100);unclassified(100);unclassified(100);unclassified(100);unclassified(100);unclassified(100);	0	0	0	0	0	0	0	1	0	0	0
Otu014032	Bacteria(100);Firmicutes(100);Clostridia(100);Clostridiales(100);unclassified(100);unclassified(100);	0	0	0	0	0	0	0	1	0	0	0
Otu014033	Bacteria(100);Firmicutes(100);Clostridia(100);Clostridiales(100);Lachnospiraceae(100);unclassified(100);	0	0	0	0	0	0	0	1	0	0	0
Otu014034	Bacteria(100);Firmicutes(100);Clostridia(100);Clostridiales(100);Lachnospiraceae(100);unclassified(100);	0	0	0	0	0	0	0	1	0	0	0
Otu014036	Bacteria(100);Proteobacteria(100);Betaproteobacteria(100);Burkholderiales(100);Alcaligenaceae(100);Sutterella(100);	0	0	0	0	0	0	0	1	0	0	0
Otu014040	Bacteria(100);Bacteroidetes(100);Bacteroidia(100);Bacteroidales(100);unclassified(100);unclassified(100);	0	0	0	0	0	0	0	1	0	0	0
Otu014041	Bacteria(100);Bacteroidetes(100);Bacteroidia(100);Bacteroidales(100);Rikenellaceae(100);Alistipes(100);	0	0	0	0	0	0	0	1	0	0	0
Otu014042	Bacteria(100);Actinobacteria(100);Actinobacteria(100);Bifidobacteriales(100);Bifidobacteriaceae(100);unclassified(100);	0	0	0	0	0	0	0	1	0	0	0
Otu014044	Bacteria(100);Firmicutes(100);Clostridia(100);Clostridiales(100);Ruminococcaceae(100);Anaerotruncus(100);	0	0	0	0	0	0	0	1	0	0	0
Otu014046	Bacteria(100);unclassified(100);unclassified(100);unclassified(100);unclassified(100);unclassified(100);	0	0	0	0	0	0	0	1	0	0	0
Otu014048	Bacteria(100);Bacteroidetes(100);unclassified(100);unclassified(100);unclassified(100);unclassified(100);	0	0	0	0	0	0	0	1	0	0	0
Otu014050	Bacteria(100);unclassified(100);unclassified(100);unclassified(100);unclassified(100);unclassified(100);	0	0	0	0	0	0	0	1	0	0	0
Otu014051	Bacteria(100);unclassified(100);unclassified(100);unclassified(100);unclassified(100);unclassified(100);	0	0	0	0	0	0	0	1	0	0	0
Otu014053	Bacteria(100);unclassified(100);unclassified(100);unclassified(100);unclassified(100);unclassified(100);	0	0	0	0	0	0	0	1	0	0	0
Otu014054	Bacteria(100);unclassified(100);unclassified(100);unclassified(100);unclassified(100);unclassified(100);	0	0	0	0	0	0	0	1	0	0	0
Otu014056	Bacteria(100);Bacteroidetes(100);Bacteroidia(100);Bacteroidales(100);Porphyromonadaceae(100);Coprobacter(100);	0	0	0	0	0	0	0	1	0	0	0
Otu014057	Bacteria(100);Firmicutes(100);Clostridia(100);Clostridiales(100);unclassified(100);unclassified(100);	0	0	0	0	0	0	0	1	0	0	0
Otu014059	Bacteria(100);Bacteroidetes(100);Bacteroidia(100);Bacteroidales(100);unclassified(100);unclassified(100);	0	0	0	0	0	0	0	1	0	0	0
Otu014060	Bacteria(100);unclassified(100);unclassified(100);unclassified(100);unclassified(100);unclassified(100);	0	0	0	0	0	0	0	1	0	0	0
Otu014066	Bacteria(100);Bacteroidetes(100);unclassified(100);unclassified(100);unclassified(100);unclassified(100);	0	0	0	0	0	0	0	1	0	0	0
Otu014070	Bacteria(100);Firmicutes(100);Clostridia(100);Clostridiales(100);Ruminococcaceae(100);unclassified(100);	0	0	0	0	0	0	0	1	0	0	0
Otu014071	Bacteria(100);Bacteroidetes(100);Bacteroidia(100);Bacteroidales(100);unclassified(100);unclassified(100);	0	0	0	0	0	0	0	1	0	0	0
Otu014074	Bacteria(100);Bacteroidetes(100);Bacteroidia(100);Bacteroidales(100);Porphyromonadaceae(100);Parabacteroides(100);	0	0	0	0	0	0	0	0	1	0	0
Otu014075	Bacteria(100);Firmicutes(100);Clostridia(100);Clostridiales(100);Lachnospiraceae(100);unclassified(100);	0	0	0	0	0	0	0	0	1	0	0
Otu014078	Bacteria(100);unclassified(100);unclassified(100);unclassified(100);unclassified(100);unclassified(100);	0	0	0	0	0	0	0	0	1	0	0
Otu014080	Bacteria(100);Bacteroidetes(100);Bacteroidia(100);Bacteroidales(100);Porphyromonadaceae(100);Parabacteroides(100);	0	0	0	0	0	0	0	0	1	0	0
Otu014085	Bacteria(100);Firmicutes(100);Clostridia(100);Clostridiales(100);Lachnospiraceae(100);unclassified(100);	0	0	0	0	0	0	0	0	1	0	0
Otu014092	Bacteria(100);Bacteroidetes(100);Bacteroidia(100);Bacteroidales(100);Porphyromonadaceae(100);Parabacteroides(100);	0	0	0	0	0	0	0	0	1	0	0
Otu014093	Bacteria(100);Bacteroidetes(100);Bacteroidia(100);Bacteroidales(100);Bacteroidaceae(100);Bacteroides(100);	0	0	0	0	0	0	0	0	1	0	0
Otu014094	Bacteria(100);Bacteroidetes(100);Bacteroidia(100);Bacteroidales(100);Porphyromonadaceae(100);Parabacteroides(100);	0	0	0	0	0	0	0	0	1	0	0
Otu014096	Bacteria(100);Bacteroidetes(100);Bacteroidia(100);Bacteroidales(100);Porphyromonadaceae(100);Parabacteroides(100);	0	0	0	0	0	0	0	0	1	0	0
Otu014097	Bacteria(100);Bacteroidetes(100);Bacteroidia(100);Bacteroidales(100);Prevotellaceae(100);Prevotella(100);	0	0	0	0	0	0	0	0	1	0	0
Otu014098	Bacteria(100);Actinobacteria(100);Actinobacteria(100);Bifidobacteriales(100);Bifidobacteriaceae(100);unclassified(100);	0	0	0	0	0	0	0	0	1	0	0
Otu014104	Bacteria(100);Bacteroidetes(100);Bacteroidia(100);Bacteroidales(100);unclassified(100);unclassified(100);	0	0	0	0	0	0	0	0	1	0	0
Otu014106	Bacteria(100);Bacteroidetes(100);Bacteroidia(100);Bacteroidales(100);Porphyromonadaceae(100);Parabacteroides(100);	0	0	0	0	0	0	0	0	1	0	0
Otu014108	Bacteria(100);Bacteroidetes(100);Bacteroidia(100);Bacteroidales(100);Porphyromonadaceae(100);Odoribacter(100);	0	0	0	0	0	0	0	0	1	0	0
Otu014111	Bacteria(100);Bacteroidetes(100);Bacteroidia(100);Bacteroidales(100);unclassified(100);unclassified(100);	0	0	0	0	0	0	0	0	1	0	0
Otu014112	Bacteria(100);unclassified(100);unclassified(100);unclassified(100);unclassified(100);unclassified(100);	0	0	0	0	0	0	0	0	1	0	0
Otu014113	Bacteria(100);Firmicutes(100);Clostridia(100);Clostridiales(100);Lachnospiraceae(100);unclassified(100);	0	0	0	0	0	0	0	0	1	0	0
Otu014115	Bacteria(100);Bacteroidetes(100);Bacteroidia(100);Bacteroidales(100);Porphyromonadaceae(100);unclassified(100);	0	0	0	0	0	0	0	0	1	0	0
Otu014117	Bacteria(100);Firmicutes(100);Clostridia(100);Clostridiales(100);Lachnospiraceae(100);unclassified(100);	0	0	0	0	0	0	0	0	1	0	0
Otu014118	Bacteria(100);Firmicutes(100);Negativicutes(100);Selenomonadales(100);Veillonellaceae(100);Dialister(100);	0	0	0	0	0	0	0	0	1	0	0
Otu014120	Bacteria(100);Bacteroidetes(100);Bacteroidia(100);Bacteroidales(100);Porphyromonadaceae(100);unclassified(100);	0	0	0	0	0	0	0	0	1	0	0
Otu014122	Bacteria(100);unclassified(100);unclassified(100);unclassified(100);unclassified(100);unclassified(100);	0	0	0	0	0	0	0	0	1	0	0
Otu014123	Bacteria(100);Bacteroidetes(100);unclassified(100);unclassified(100);unclassified(100);unclassified(100);	0	0	0	0	0	0	0	0	1	0	0
Otu014129	Bacteria(100);Firmicutes(100);Clostridia(100);Clostridiales(100);Lachnospiraceae(100);unclassified(100);	0	0	0	0	0	0	0	0	1	0	0
Otu014130	Bacteria(100);Firmicutes(100);Clostridia(100);Clostridiales(100);Ruminococcaceae(100);unclassified(100);	0	0	0	0	0	0	0	0	1	0	0
Otu014135	Bacteria(100);Bacteroidetes(100);Bacteroidia(100);Bacteroidales(100);Porphyromonadaceae(100);unclassified(100);	0	0	0	0	0	0	0	0	1	0	0
Otu014136	Bacteria(100);Firmicutes(100);Clostridia(100);Clostridiales(100);unclassified(100);unclassified(100);	0	0	0	0	0	0	0	0	1	0	0
Otu014141	Bacteria(100);Bacteroidetes(100);Bacteroidia(100);Bacteroidales(100);Porphyromonadaceae(100);Parabacteroides(100);	0	0	0	0	0	0	0	0	1	0	0
Otu014142	Bacteria(100);Firmicutes(100);Negativicutes(100);Selenomonadales(100);Veillonellaceae(100);Dialister(100);	0	0	0	0	0	0	0	0	1	0	0
Otu014145	Bacteria(100);Firmicutes(100);Clostridia(100);Clostridiales(100);Lachnospiraceae(100);unclassified(100);	0	0	0	0	0	0	0	0	1	0	0
Otu014146	Bacteria(100);Firmicutes(100);Clostridia(100);Clostridiales(100);Lachnospiraceae(100);possible_genus_Sk018(100);	0	0	0	0	0	0	0	0	1	0	0
Otu014152	Bacteria(100);Firmicutes(100);unclassified(100);unclassified(100);unclassified(100);unclassified(100);	0	0	0	0	0	0	0	0	1	0	0
Otu014153	Bacteria(100);Bacteroidetes(100);unclassified(100);unclassified(100);unclassified(100);unclassified(100);	0	0	0	0	0	0	0	0	1	0	0
Otu014154	Bacteria(100);unclassified(100);unclassified(100);unclassified(100);unclassified(100);unclassified(100);	0	0	0	0	0	0	0	0	1	0	0
Otu014155	Bacteria(100);unclassified(100);unclassified(100);unclassified(100);unclassified(100);unclassified(100);	0	0	0	0	0	0	0	0	1	0	0
Otu014157	Bacteria(100);Firmicutes(100);Clostridia(100);Clostridiales(100);Ruminococcaceae(100);Subdoligranulum(100);	0	0	0	0	0	0	0	0	1	0	0
Otu014159	Bacteria(100);Firmicutes(100);Clostridia(100);Clostridiales(100);Clostridiaceae_1(100);unclassified(100);	0	0	0	0	0	0	0	0	1	0	0
Otu014168	Bacteria(100);Firmicutes(100);Negativicutes(100);Selenomonadales(100);Veillonellaceae(100);Dialister(100);	0	0	0	0	0	0	0	0	1	0	0
Otu014169	Bacteria(100);Firmicutes(100);unclassified(100);unclassified(100);unclassified(100);unclassified(100);	0	0	0	0	0	0	0	0	1	0	0
Otu014171	Bacteria(100);Bacteroidetes(100);Bacteroidia(100);Bacteroidales(100);unclassified(100);unclassified(100);	0	0	0	0	0	0	0	0	1	0	0
Otu014173	Bacteria(100);Firmicutes(100);Clostridia(100);Clostridiales(100);Lachnospiraceae(100);Incertae_Sedis(100);	0	0	0	0	0	0	0	0	1	0	0
Otu014174	Bacteria(100);unclassified(100);unclassified(100);unclassified(100);unclassified(100);unclassified(100);	0	0	0	0	0	0	0	0	1	0	0
Otu014176	Bacteria(100);Firmicutes(100);Clostridia(100);Clostridiales(100);unclassified(100);unclassified(100);	0	0	0	0	0	0	0	0	1	0	0
Otu014178	Bacteria(100);Bacteroidetes(100);Bacteroidia(100);Bacteroidales(100);Prevotellaceae(100);Prevotella(100);	0	0	0	0	0	0	0	0	1	0	0
Otu014179	Bacteria(100);unclassified(100);unclassified(100);unclassified(100);unclassified(100);unclassified(100);	0	0	0	0	0	0	0	0	1	0	0
Otu014180	Bacteria(100);unclassified(100);unclassified(100);unclassified(100);unclassified(100);unclassified(100);	0	0	0	0	0	0	0	0	1	0	0
Otu014181	Bacteria(100);Bacteroidetes(100);Bacteroidia(100);Bacteroidales(100);unclassified(100);unclassified(100);	0	0	0	0	0	0	0	0	1	0	0
Otu014182	Bacteria(100);Firmicutes(100);Clostridia(100);Clostridiales(100);Lachnospiraceae(100);unclassified(100);	0	0	0	0	0	0	0	0	1	0	0
Otu014183	Bacteria(100);unclassified(100);unclassified(100);unclassified(100);unclassified(100);unclassified(100);	0	0	0	0	0	0	0	0	1	0	0
Otu014184	Bacteria(100);unclassified(100);unclassified(100);unclassified(100);unclassified(100);unclassified(100);	0	0	0	0	0	0	0	0	1	0	0
Otu014192	Bacteria(100);Bacteroidetes(100);Bacteroidia(100);Bacteroidales(100);Porphyromonadaceae(100);Parabacteroides(100);	0	0	0	0	0	0	0	0	1	0	0
Otu014194	Bacteria(100);Firmicutes(100);Clostridia(100);Clostridiales(100);Ruminococcaceae(100);Subdoligranulum(100);	0	0	0	0	0	0	0	0	1	0	0
Otu014195	Bacteria(100);Bacteroidetes(100);Bacteroidia(100);Bacteroidales(100);Prevotellaceae(100);Prevotella(100);	0	0	0	0	0	0	0	0	1	0	0
Otu014196	Bacteria(100);Firmicutes(100);Negativicutes(100);Selenomonadales(100);Veillonellaceae(100);Dialister(100);	0	0	0	0	0	0	0	0	1	0	0
Otu014202	Bacteria(100);Bacteroidetes(100);unclassified(100);unclassified(100);unclassified(100);unclassified(100);	0	0	0	0	0	0	0	0	1	0	0
Otu014206	Bacteria(100);Firmicutes(100);Clostridia(100);Clostridiales(100);Lachnospiraceae(100);unclassified(100);	0	0	0	0	0	0	0	0	1	0	0
Otu014207	Bacteria(100);unclassified(100);unclassified(100);unclassified(100);unclassified(100);unclassified(100);	0	0	0	0	0	0	0	0	1	0	0
Otu014208	Bacteria(100);Bacteroidetes(100);Bacteroidia(100);Bacteroidales(100);Porphyromonadaceae(100);Parabacteroides(100);	0	0	0	0	0	0	0	0	1	0	0
Otu014216	Bacteria(100);Firmicutes(100);Negativicutes(100);Selenomonadales(100);Veillonellaceae(100);unclassified(100);	0	0	0	0	0	0	0	0	1	0	0
Otu014220	Bacteria(100);Bacteroidetes(100);Bacteroidia(100);Bacteroidales(100);unclassified(100);unclassified(100);	0	0	0	0	0	0	0	0	1	0	0
Otu014224	Bacteria(100);unclassified(100);unclassified(100);unclassified(100);unclassified(100);unclassified(100);	0	0	0	0	0	0	0	0	1	0	0
Otu014229	Bacteria(100);unclassified(100);unclassified(100);unclassified(100);unclassified(100);unclassified(100);	0	0	0	0	0	0	0	0	1	0	0
Otu014230	Bacteria(100);Bacteroidetes(100);Bacteroidia(100);Bacteroidales(100);unclassified(100);unclassified(100);	0	0	0	0	0	0	0	0	1	0	0
Otu014231	Bacteria(100);Bacteroidetes(100);Bacteroidia(100);Bacteroidales(100);Prevotellaceae(100);Prevotella(100);	0	0	0	0	0	0	0	0	1	0	0
Otu014233	Bacteria(100);Firmicutes(100);Clostridia(100);Clostridiales(100);Lachnospiraceae(100);Lachnospira(100);	0	0	0	0	0	0	0	0	1	0	0
Otu014237	Bacteria(100);Bacteroidetes(100);Bacteroidia(100);Bacteroidales(100);unclassified(100);unclassified(100);	0	0	0	0	0	0	0	0	1	0	0
Otu014239	Bacteria(100);Bacteroidetes(100);Bacteroidia(100);Bacteroidales(100);Porphyromonadaceae(100);unclassified(100);	0	0	0	0	0	0	0	0	1	0	0
Otu014240	Bacteria(100);Bacteroidetes(100);Bacteroidia(100);Bacteroidales(100);Prevotellaceae(100);Alloprevotella(100);	0	0	0	0	0	0	0	0	1	0	0
Otu014241	Bacteria(100);Firmicutes(100);Negativicutes(100);Selenomonadales(100);Veillonellaceae(100);unclassified(100);	0	0	0	0	0	0	0	0	1	0	0
Otu014243	Bacteria(100);Bacteroidetes(100);Bacteroidia(100);Bacteroidales(100);Porphyromonadaceae(100);Parabacteroides(100);	0	0	0	0	0	0	0	0	1	0	0
Otu014246	Bacteria(100);Bacteroidetes(100);Bacteroidia(100);Bacteroidales(100);unclassified(100);unclassified(100);	0	0	0	0	0	0	0	0	1	0	0
Otu014252	Bacteria(100);Bacteroidetes(100);Bacteroidia(100);Bacteroidales(100);Porphyromonadaceae(100);Parabacteroides(100);	0	0	0	0	0	0	0	0	1	0	0
Otu014255	Bacteria(100);Firmicutes(100);Clostridia(100);Clostridiales(100);Lachnospiraceae(100);unclassified(100);	0	0	0	0	0	0	0	0	1	0	0
Otu014256	Bacteria(100);Firmicutes(100);Clostridia(100);Clostridiales(100);Lachnospiraceae(100);unclassified(100);	0	0	0	0	0	0	0	0	1	0	0
Otu014265	Bacteria(100);Firmicutes(100);Clostridia(100);Clostridiales(100);Ruminococcaceae(100);unclassified(100);	0	0	0	0	0	0	0	0	1	0	0
Otu014267	Bacteria(100);Bacteroidetes(100);Bacteroidia(100);Bacteroidales(100);Porphyromonadaceae(100);Parabacteroides(100);	0	0	0	0	0	0	0	0	1	0	0
Otu014269	Bacteria(100);Firmicutes(100);Clostridia(100);Clostridiales(100);Ruminococcaceae(100);Faecalibacterium(100);	0	0	0	0	0	0	0	0	1	0	0
Otu014270	Bacteria(100);Firmicutes(100);Clostridia(100);Clostridiales(100);Lachnospiraceae(100);unclassified(100);	0	0	0	0	0	0	0	0	1	0	0
Otu014271	Bacteria(100);Firmicutes(100);Clostridia(100);Clostridiales(100);Lachnospiraceae(100);unclassified(100);	0	0	0	0	0	0	0	0	1	0	0
Otu014278	Bacteria(100);Firmicutes(100);unclassified(100);unclassified(100);unclassified(100);unclassified(100);	0	0	0	0	0	0	0	0	1	0	0
Otu014279	Bacteria(100);Bacteroidetes(100);Bacteroidia(100);Bacteroidales(100);unclassified(100);unclassified(100);	0	0	0	0	0	0	0	0	1	0	0
Otu014280	Bacteria(100);Firmicutes(100);Clostridia(100);Clostridiales(100);Lachnospiraceae(100);unclassified(100);	0	0	0	0	0	0	0	0	1	0	0
Otu014283	Bacteria(100);Firmicutes(100);Clostridia(100);Clostridiales(100);Lachnospiraceae(100);unclassified(100);	0	0	0	0	0	0	0	0	1	0	0
Otu014288	Bacteria(100);Firmicutes(100);Negativicutes(100);Selenomonadales(100);Veillonellaceae(100);Dialister(100);	0	0	0	0	0	0	0	0	1	0	0
Otu014290	Bacteria(100);Bacteroidetes(100);Bacteroidia(100);Bacteroidales(100);unclassified(100);unclassified(100);	0	0	0	0	0	0	0	0	1	0	0
Otu014292	Bacteria(100);Firmicutes(100);Clostridia(100);Clostridiales(100);Lachnospiraceae(100);Lachnospira(100);	0	0	0	0	0	0	0	0	1	0	0
Otu014293	Bacteria(100);Bacteroidetes(100);Bacteroidia(100);Bacteroidales(100);Porphyromonadaceae(100);unclassified(100);	0	0	0	0	0	0	0	0	1	0	0
Otu014300	Bacteria(100);Bacteroidetes(100);Bacteroidia(100);Bacteroidales(100);Prevotellaceae(100);unclassified(100);	0	0	0	0	0	0	0	0	1	0	0
Otu014304	Bacteria(100);Bacteroidetes(100);unclassified(100);unclassified(100);unclassified(100);unclassified(100);	0	0	0	0	0	0	0	0	1	0	0
Otu014306	Bacteria(100);Firmicutes(100);unclassified(100);unclassified(100);unclassified(100);unclassified(100);	0	0	0	0	0	0	0	0	1	0	0
Otu014309	Bacteria(100);Bacteroidetes(100);Bacteroidia(100);Bacteroidales(100);Porphyromonadaceae(100);unclassified(100);	0	0	0	0	0	0	0	0	1	0	0
Otu014313	Bacteria(100);Firmicutes(100);Clostridia(100);Clostridiales(100);Ruminococcaceae(100);Sporobacter(100);	0	0	0	0	0	0	0	0	1	0	0
Otu014314	Bacteria(100);Bacteroidetes(100);Bacteroidia(100);Bacteroidales(100);unclassified(100);unclassified(100);	0	0	0	0	0	0	0	0	1	0	0
Otu014315	Bacteria(100);Firmicutes(100);Clostridia(100);Clostridiales(100);Lachnospiraceae(100);unclassified(100);	0	0	0	0	0	0	0	0	1	0	0
Otu014316	Bacteria(100);unclassified(100);unclassified(100);unclassified(100);unclassified(100);unclassified(100);	0	0	0	0	0	0	0	0	1	0	0
Otu014318	Bacteria(100);Bacteroidetes(100);Bacteroidia(100);Bacteroidales(100);unclassified(100);unclassified(100);	0	0	0	0	0	0	0	0	1	0	0
Otu014321	Bacteria(100);Firmicutes(100);Clostridia(100);Clostridiales(100);Lachnospiraceae(100);unclassified(100);	0	0	0	0	0	0	0	0	1	0	0
Otu014323	Bacteria(100);unclassified(100);unclassified(100);unclassified(100);unclassified(100);unclassified(100);	0	0	0	0	0	0	0	0	1	0	0
Otu014324	Bacteria(100);Bacteroidetes(100);Bacteroidia(100);Bacteroidales(100);Porphyromonadaceae(100);Parabacteroides(100);	0	0	0	0	0	0	0	0	1	0	0
Otu014325	Bacteria(100);Bacteroidetes(100);Bacteroidia(100);Bacteroidales(100);unclassified(100);unclassified(100);	0	0	0	0	0	0	0	0	1	0	0
Otu014326	Bacteria(100);unclassified(100);unclassified(100);unclassified(100);unclassified(100);unclassified(100);	0	0	0	0	0	0	0	0	1	0	0
Otu014327	Bacteria(100);Firmicutes(100);Negativicutes(100);Selenomonadales(100);Veillonellaceae(100);Dialister(100);	0	0	0	0	0	0	0	0	1	0	0
Otu014329	Bacteria(100);Bacteroidetes(100);Bacteroidia(100);Bacteroidales(100);Porphyromonadaceae(100);Parabacteroides(100);	0	0	0	0	0	0	0	0	1	0	0
Otu014333	Bacteria(100);Firmicutes(100);Clostridia(100);Clostridiales(100);Lachnospiraceae(100);Incertae_Sedis(100);	0	0	0	0	0	0	0	0	1	0	0
Otu014334	Bacteria(100);Bacteroidetes(100);Bacteroidia(100);Bacteroidales(100);Porphyromonadaceae(100);Parabacteroides(100);	0	0	0	0	0	0	0	0	1	0	0
Otu014336	Bacteria(100);unclassified(100);unclassified(100);unclassified(100);unclassified(100);unclassified(100);	0	0	0	0	0	0	0	0	1	0	0
Otu014338	Bacteria(100);unclassified(100);unclassified(100);unclassified(100);unclassified(100);unclassified(100);	0	0	0	0	0	0	0	0	1	0	0
Otu014339	Bacteria(100);unclassified(100);unclassified(100);unclassified(100);unclassified(100);unclassified(100);	0	0	0	0	0	0	0	1	0	0	0
Otu014341	Bacteria(100);Firmicutes(100);Clostridia(100);unclassified(100);unclassified(100);unclassified(100);	0	0	0	0	0	0	0	0	1	0	0
Otu014342	Bacteria(100);Bacteroidetes(100);unclassified(100);unclassified(100);unclassified(100);unclassified(100);	0	0	0	0	0	0	0	1	0	0	0
Otu014343	Bacteria(100);Firmicutes(100);unclassified(100);unclassified(100);unclassified(100);unclassified(100);	0	0	0	0	0	0	0	1	0	0	0
Otu014344	Bacteria(100);Bacteroidetes(100);Bacteroidia(100);Bacteroidales(100);Bacteroidaceae(100);Bacteroides(100);	0	0	0	0	0	0	0	1	0	0	0
Otu014345	Bacteria(100);Bacteroidetes(100);Bacteroidia(100);Bacteroidales(100);unclassified(100);unclassified(100);	0	0	0	0	0	0	0	1	0	0	0
Otu014346	Bacteria(100);unclassified(100);unclassified(100);unclassified(100);unclassified(100);unclassified(100);	0	0	0	0	0	0	0	1	0	0	0
Otu014347	Bacteria(100);Firmicutes(100);Clostridia(100);Clostridiales(100);unclassified(100);unclassified(100);	0	0	0	0	0	0	0	1	0	0	0
Otu014349	Bacteria(100);unclassified(100);unclassified(100);unclassified(100);unclassified(100);unclassified(100);	0	0	0	0	0	0	0	1	0	0	0
Otu014350	Bacteria(100);Bacteroidetes(100);Bacteroidia(100);Bacteroidales(100);unclassified(100);unclassified(100);	0	0	0	0	0	0	0	1	0	0	0
Otu014352	Bacteria(100);Bacteroidetes(100);Bacteroidia(100);Bacteroidales(100);unclassified(100);unclassified(100);	0	0	0	0	0	0	0	1	0	0	0
Otu014357	Bacteria(100);Firmicutes(100);Clostridia(100);unclassified(100);unclassified(100);unclassified(100);	0	0	0	0	0	0	0	0	1	0	0
Otu014359	Bacteria(100);Firmicutes(100);Clostridia(100);Clostridiales(100);unclassified(100);unclassified(100);	0	0	0	0	0	0	0	0	1	0	0
Otu014361	Bacteria(100);Bacteroidetes(100);unclassified(100);unclassified(100);unclassified(100);unclassified(100);	0	0	0	0	0	0	0	0	1	0	0
Otu014365	Bacteria(100);Bacteroidetes(100);Bacteroidia(100);Bacteroidales(100);Prevotellaceae(100);Prevotella(100);	0	0	0	0	0	0	0	0	1	0	0
Otu014368	Bacteria(100);Bacteroidetes(100);Bacteroidia(100);Bacteroidales(100);unclassified(100);unclassified(100);	0	0	0	0	0	0	0	0	1	0	0
Otu014369	Bacteria(100);Bacteroidetes(100);Bacteroidia(100);Bacteroidales(100);Prevotellaceae(100);Paraprevotella(100);	0	0	0	0	0	0	0	0	1	0	0
Otu014372	Bacteria(100);Bacteroidetes(100);Bacteroidia(100);Bacteroidales(100);Prevotellaceae(100);Paraprevotella(100);	0	0	0	0	0	0	0	0	1	0	0
Otu014383	Bacteria(100);Bacteroidetes(100);Bacteroidia(100);Bacteroidales(100);unclassified(100);unclassified(100);	0	0	0	0	0	0	0	0	1	0	0
Otu014391	Bacteria(100);Firmicutes(100);Clostridia(100);Clostridiales(100);Lachnospiraceae(100);Lachnospira(100);	0	0	0	0	0	0	0	0	1	0	0
Otu014393	Bacteria(100);Bacteroidetes(100);Bacteroidia(100);Bacteroidales(100);Prevotellaceae(100);Prevotella(100);	0	0	0	0	0	0	0	0	1	0	0
Otu014394	Bacteria(100);Bacteroidetes(100);Bacteroidia(100);Bacteroidales(100);Porphyromonadaceae(100);unclassified(100);	0	0	0	0	0	0	0	0	1	0	0
Otu014395	Bacteria(100);Firmicutes(100);Clostridia(100);Clostridiales(100);Ruminococcaceae(100);Ruminococcus(100);	0	0	0	0	0	0	0	0	1	0	0
Otu014399	Bacteria(100);Firmicutes(100);Clostridia(100);Clostridiales(100);Ruminococcaceae(100);unclassified(100);	0	0	0	0	0	0	0	0	1	0	0
Otu014402	Bacteria(100);Bacteroidetes(100);Bacteroidia(100);Bacteroidales(100);Porphyromonadaceae(100);Parabacteroides(100);	0	0	0	0	0	0	0	0	1	0	0
Otu014405	Bacteria(100);Bacteroidetes(100);Bacteroidia(100);Bacteroidales(100);unclassified(100);unclassified(100);	0	0	0	0	0	0	0	0	1	0	0
Otu014408	Bacteria(100);Firmicutes(100);Clostridia(100);Clostridiales(100);Ruminococcaceae(100);unclassified(100);	0	0	0	0	0	0	0	0	1	0	0
Otu014411	Bacteria(100);Bacteroidetes(100);Bacteroidia(100);Bacteroidales(100);unclassified(100);unclassified(100);	0	0	0	0	0	0	0	0	1	0	0
Otu014414	Bacteria(100);Firmicutes(100);Clostridia(100);Clostridiales(100);Ruminococcaceae(100);unclassified(100);	0	0	0	0	0	0	0	0	1	0	0
Otu014415	Bacteria(100);Firmicutes(100);unclassified(100);unclassified(100);unclassified(100);unclassified(100);	0	0	0	0	0	0	0	0	1	0	0
Otu014417	Bacteria(100);Bacteroidetes(100);Bacteroidia(100);Bacteroidales(100);Porphyromonadaceae(100);Parabacteroides(100);	0	0	0	0	0	0	0	0	1	0	0
Otu014420	Bacteria(100);unclassified(100);unclassified(100);unclassified(100);unclassified(100);unclassified(100);	0	0	0	0	0	0	0	0	1	0	0
Otu014424	Bacteria(100);Firmicutes(100);Erysipelotrichia(100);Erysipelotrichales(100);Erysipelotrichaceae(100);unclassified(100);	0	0	0	0	0	0	0	0	1	0	0
Otu014427	Bacteria(100);Bacteroidetes(100);Bacteroidia(100);Bacteroidales(100);Porphyromonadaceae(100);unclassified(100);	0	0	0	0	0	0	0	0	1	0	0
Otu014432	Bacteria(100);Bacteroidetes(100);unclassified(100);unclassified(100);unclassified(100);unclassified(100);	0	0	0	0	0	0	0	0	1	0	0
Otu014433	Bacteria(100);Firmicutes(100);Clostridia(100);Clostridiales(100);Ruminococcaceae(100);Subdoligranulum(100);	0	0	0	0	0	0	0	0	1	0	0
Otu014439	Bacteria(100);Firmicutes(100);Clostridia(100);Clostridiales(100);Ruminococcaceae(100);Incertae_Sedis(100);	0	0	0	0	0	0	0	0	1	0	0
Otu014441	Bacteria(100);Bacteroidetes(100);Bacteroidia(100);Bacteroidales(100);unclassified(100);unclassified(100);	0	0	0	0	0	0	0	0	1	0	0
Otu014442	Bacteria(100);Firmicutes(100);Negativicutes(100);Selenomonadales(100);Veillonellaceae(100);Dialister(100);	0	0	0	0	0	0	0	0	1	0	0
Otu014446	Bacteria(100);Firmicutes(100);Clostridia(100);Clostridiales(100);Lachnospiraceae(100);unclassified(100);	0	0	0	0	0	0	0	0	1	0	0
Otu014450	Bacteria(100);Tenericutes(100);Mollicutes(100);RF9(100);unclassified(100);unclassified(100);	0	0	0	0	0	0	0	0	1	0	0
Otu014451	Bacteria(100);unclassified(100);unclassified(100);unclassified(100);unclassified(100);unclassified(100);	0	0	0	0	0	0	0	0	1	0	0
Otu014457	Bacteria(100);unclassified(100);unclassified(100);unclassified(100);unclassified(100);unclassified(100);	0	0	0	0	0	0	0	0	1	0	0
Otu014459	Bacteria(100);Firmicutes(100);unclassified(100);unclassified(100);unclassified(100);unclassified(100);	0	0	0	0	0	0	0	0	1	0	0
Otu014465	Bacteria(100);Bacteroidetes(100);Bacteroidia(100);Bacteroidales(100);Prevotellaceae(100);Prevotella(100);	0	0	0	0	0	0	0	0	1	0	0
Otu014466	Bacteria(100);Firmicutes(100);unclassified(100);unclassified(100);unclassified(100);unclassified(100);	0	0	0	0	0	0	0	0	1	0	0
Otu014474	Bacteria(100);Firmicutes(100);unclassified(100);unclassified(100);unclassified(100);unclassified(100);	0	0	0	0	0	0	0	0	1	0	0
Otu014475	Bacteria(100);Bacteroidetes(100);Bacteroidia(100);Bacteroidales(100);Porphyromonadaceae(100);Parabacteroides(100);	0	0	0	0	0	0	0	0	1	0	0
Otu014477	Bacteria(100);Bacteroidetes(100);Bacteroidia(100);Bacteroidales(100);Prevotellaceae(100);Prevotella(100);	0	0	0	0	0	0	0	0	1	0	0
Otu014478	Bacteria(100);Firmicutes(100);Clostridia(100);Clostridiales(100);Ruminococcaceae(100);Faecalibacterium(100);	0	0	0	0	0	0	0	0	1	0	0
Otu014480	Bacteria(100);Bacteroidetes(100);Bacteroidia(100);Bacteroidales(100);Porphyromonadaceae(100);unclassified(100);	0	0	0	0	0	0	0	0	1	0	0
Otu014481	Bacteria(100);Firmicutes(100);unclassified(100);unclassified(100);unclassified(100);unclassified(100);	0	0	0	0	0	1	0	0	0	0	0
Otu014483	Bacteria(100);Firmicutes(100);Clostridia(100);Clostridiales(100);Lachnospiraceae(100);unclassified(100);	0	0	0	0	0	1	0	0	0	0	0
Otu014484	Bacteria(100);Firmicutes(100);Clostridia(100);Clostridiales(100);Ruminococcaceae(100);Faecalibacterium(100);	0	0	0	0	0	1	0	0	0	0	0
Otu014486	Bacteria(100);Bacteroidetes(100);Bacteroidia(100);Bacteroidales(100);ratAN060301C(100);unclassified(100);	0	0	0	0	0	1	0	0	0	0	0
Otu014491	Bacteria(100);unclassified(100);unclassified(100);unclassified(100);unclassified(100);unclassified(100);	0	0	0	0	0	1	0	0	0	0	0
Otu014494	Bacteria(100);Bacteroidetes(100);Bacteroidia(100);Bacteroidales(100);unclassified(100);unclassified(100);	0	0	0	0	0	1	0	0	0	0	0
Otu014495	Bacteria(100);unclassified(100);unclassified(100);unclassified(100);unclassified(100);unclassified(100);	0	0	0	0	0	1	0	0	0	0	0
Otu014496	Bacteria(100);unclassified(100);unclassified(100);unclassified(100);unclassified(100);unclassified(100);	0	0	0	0	0	1	0	0	0	0	0
Otu014498	Bacteria(100);Firmicutes(100);Clostridia(100);Clostridiales(100);Lachnospiraceae(100);Coprococcus(100);	0	0	0	0	0	1	0	0	0	0	0
Otu014501	Bacteria(100);Bacteroidetes(100);Bacteroidia(100);Bacteroidales(100);Porphyromonadaceae(100);Parabacteroides(100);	0	0	0	0	0	1	0	0	0	0	0
Otu014502	Bacteria(100);unclassified(100);unclassified(100);unclassified(100);unclassified(100);unclassified(100);	0	0	0	0	0	1	0	0	0	0	0
Otu014503	Bacteria(100);Firmicutes(100);Clostridia(100);Clostridiales(100);unclassified(100);unclassified(100);	0	0	0	0	0	1	0	0	0	0	0
Otu014504	Bacteria(100);Bacteroidetes(100);Bacteroidia(100);Bacteroidales(100);unclassified(100);unclassified(100);	0	0	0	0	0	1	0	0	0	0	0
Otu014505	Bacteria(100);unclassified(100);unclassified(100);unclassified(100);unclassified(100);unclassified(100);	0	0	0	0	0	1	0	0	0	0	0
Otu014507	Bacteria(100);Bacteroidetes(100);Bacteroidia(100);Bacteroidales(100);unclassified(100);unclassified(100);	0	0	0	0	0	1	0	0	0	0	0
Otu014508	Bacteria(100);unclassified(100);unclassified(100);unclassified(100);unclassified(100);unclassified(100);	0	0	0	0	0	1	0	0	0	0	0
Otu014513	Bacteria(100);Bacteroidetes(100);Bacteroidia(100);Bacteroidales(100);unclassified(100);unclassified(100);	0	0	0	0	0	1	0	0	0	0	0
Otu014514	Bacteria(100);Bacteroidetes(100);Bacteroidia(100);Bacteroidales(100);unclassified(100);unclassified(100);	0	0	0	0	0	1	0	0	0	0	0
Otu014519	Bacteria(100);unclassified(100);unclassified(100);unclassified(100);unclassified(100);unclassified(100);	0	0	0	0	0	1	0	0	0	0	0
Otu014520	Bacteria(100);Bacteroidetes(100);Bacteroidia(100);Bacteroidales(100);unclassified(100);unclassified(100);	0	0	0	0	0	1	0	0	0	0	0
Otu014522	Bacteria(100);unclassified(100);unclassified(100);unclassified(100);unclassified(100);unclassified(100);	0	0	0	0	0	1	0	0	0	0	0
Otu014524	Bacteria(100);Firmicutes(100);Clostridia(100);Clostridiales(100);Lachnospiraceae(100);unclassified(100);	0	0	0	0	0	1	0	0	0	0	0
Otu014529	Bacteria(100);unclassified(100);unclassified(100);unclassified(100);unclassified(100);unclassified(100);	0	0	0	0	0	1	0	0	0	0	0
Otu014531	Bacteria(100);Bacteroidetes(100);Bacteroidia(100);Bacteroidales(100);ratAN060301C(100);unclassified(100);	0	0	0	0	0	1	0	0	0	0	0
Otu014532	Bacteria(100);unclassified(100);unclassified(100);unclassified(100);unclassified(100);unclassified(100);	0	0	0	0	0	1	0	0	0	0	0
Otu014533	Bacteria(100);Bacteroidetes(100);Bacteroidia(100);Bacteroidales(100);unclassified(100);unclassified(100);	0	0	0	0	0	1	0	0	0	0	0
Otu014536	Bacteria(100);Firmicutes(100);Clostridia(100);Clostridiales(100);Lachnospiraceae(100);Coprococcus(100);	0	0	0	0	0	1	0	0	0	0	0
Otu014546	Bacteria(100);unclassified(100);unclassified(100);unclassified(100);unclassified(100);unclassified(100);	0	0	0	0	0	1	0	0	0	0	0
Otu014548	Bacteria(100);Bacteroidetes(100);Bacteroidia(100);Bacteroidales(100);Porphyromonadaceae(100);Parabacteroides(100);	0	0	0	0	0	1	0	0	0	0	0
Otu014550	Bacteria(100);Bacteroidetes(100);Bacteroidia(100);Bacteroidales(100);Rikenellaceae(100);Alistipes(100);	0	0	0	0	0	1	0	0	0	0	0
Otu014551	Bacteria(100);unclassified(100);unclassified(100);unclassified(100);unclassified(100);unclassified(100);	0	0	0	0	0	1	0	0	0	0	0
Otu014559	Bacteria(100);Firmicutes(100);Clostridia(100);Clostridiales(100);Lachnospiraceae(100);Incertae_Sedis(100);	0	0	0	0	0	1	0	0	0	0	0
Otu014561	Bacteria(100);Bacteroidetes(100);Bacteroidia(100);Bacteroidales(100);unclassified(100);unclassified(100);	0	0	0	0	0	1	0	0	0	0	0
Otu014562	Bacteria(100);Bacteroidetes(100);unclassified(100);unclassified(100);unclassified(100);unclassified(100);	0	0	0	0	0	1	0	0	0	0	0
Otu014564	Bacteria(100);unclassified(100);unclassified(100);unclassified(100);unclassified(100);unclassified(100);	0	0	0	0	0	1	0	0	0	0	0
Otu014571	Bacteria(100);Bacteroidetes(100);Bacteroidia(100);Bacteroidales(100);unclassified(100);unclassified(100);	0	0	0	0	0	1	0	0	0	0	0
Otu014573	Bacteria(100);Bacteroidetes(100);Bacteroidia(100);Bacteroidales(100);unclassified(100);unclassified(100);	0	0	0	0	0	1	0	0	0	0	0
Otu014578	Bacteria(100);Firmicutes(100);Clostridia(100);Clostridiales(100);unclassified(100);unclassified(100);	0	0	0	0	0	1	0	0	0	0	0
Otu014584	Bacteria(100);Bacteroidetes(100);Bacteroidia(100);Bacteroidales(100);unclassified(100);unclassified(100);	0	0	0	0	0	1	0	0	0	0	0
Otu014585	Bacteria(100);Bacteroidetes(100);Bacteroidia(100);Bacteroidales(100);unclassified(100);unclassified(100);	0	0	0	0	0	1	0	0	0	0	0
Otu014587	Bacteria(100);Firmicutes(100);Clostridia(100);Clostridiales(100);Lachnospiraceae(100);unclassified(100);	0	0	0	0	0	1	0	0	0	0	0
Otu014593	Bacteria(100);Firmicutes(100);Clostridia(100);Clostridiales(100);unclassified(100);unclassified(100);	0	0	0	0	0	1	0	0	0	0	0
Otu014595	Bacteria(100);unclassified(100);unclassified(100);unclassified(100);unclassified(100);unclassified(100);	0	0	0	0	0	1	0	0	0	0	0
Otu014598	Bacteria(100);unclassified(100);unclassified(100);unclassified(100);unclassified(100);unclassified(100);	0	0	0	0	0	1	0	0	0	0	0
Otu014606	Bacteria(100);Firmicutes(100);Clostridia(100);Clostridiales(100);Lachnospiraceae(100);unclassified(100);	0	0	0	0	0	1	0	0	0	0	0
Otu014607	Bacteria(100);Bacteroidetes(100);Bacteroidia(100);Bacteroidales(100);unclassified(100);unclassified(100);	0	0	0	0	0	1	0	0	0	0	0
Otu014608	Bacteria(100);Bacteroidetes(100);Bacteroidia(100);Bacteroidales(100);unclassified(100);unclassified(100);	0	0	0	0	0	1	0	0	0	0	0
Otu014609	Bacteria(100);Firmicutes(100);Clostridia(100);Clostridiales(100);Ruminococcaceae(100);Faecalibacterium(100);	0	0	0	0	0	1	0	0	0	0	0
Otu014610	Bacteria(100);Bacteroidetes(100);Bacteroidia(100);Bacteroidales(100);unclassified(100);unclassified(100);	0	0	0	0	0	1	0	0	0	0	0
Otu014612	Bacteria(100);unclassified(100);unclassified(100);unclassified(100);unclassified(100);unclassified(100);	0	0	0	0	0	1	0	0	0	0	0
Otu014613	Bacteria(100);Bacteroidetes(100);Bacteroidia(100);Bacteroidales(100);Porphyromonadaceae(100);Parabacteroides(100);	0	0	0	0	0	1	0	0	0	0	0
Otu014619	Bacteria(100);Firmicutes(100);Clostridia(100);Clostridiales(100);Lachnospiraceae(100);unclassified(100);	0	0	0	0	0	1	0	0	0	0	0
Otu014620	Bacteria(100);Firmicutes(100);Clostridia(100);Clostridiales(100);Lachnospiraceae(100);unclassified(100);	0	0	0	0	0	1	0	0	0	0	0
Otu014623	Bacteria(100);Bacteroidetes(100);Bacteroidia(100);Bacteroidales(100);unclassified(100);unclassified(100);	0	0	0	0	0	1	0	0	0	0	0
Otu014624	Bacteria(100);Firmicutes(100);Clostridia(100);Clostridiales(100);Ruminococcaceae(100);unclassified(100);	0	0	0	0	0	1	0	0	0	0	0
Otu014627	Bacteria(100);Firmicutes(100);Clostridia(100);Clostridiales(100);Lachnospiraceae(100);unclassified(100);	0	0	0	0	0	1	0	0	0	0	0
Otu014629	Bacteria(100);Bacteroidetes(100);unclassified(100);unclassified(100);unclassified(100);unclassified(100);	0	0	0	0	0	1	0	0	0	0	0
Otu014631	Bacteria(100);Firmicutes(100);Clostridia(100);Clostridiales(100);Lachnospiraceae(100);unclassified(100);	0	0	0	0	0	1	0	0	0	0	0
Otu014638	Bacteria(100);Bacteroidetes(100);unclassified(100);unclassified(100);unclassified(100);unclassified(100);	0	0	0	0	0	1	0	0	0	0	0
Otu014643	Bacteria(100);Firmicutes(100);Clostridia(100);Clostridiales(100);unclassified(100);unclassified(100);	0	0	0	0	0	1	0	0	0	0	0
Otu014647	Bacteria(100);Bacteroidetes(100);Bacteroidia(100);Bacteroidales(100);unclassified(100);unclassified(100);	0	0	0	0	0	1	0	0	0	0	0
Otu014648	Bacteria(100);Firmicutes(100);Clostridia(100);Clostridiales(100);vadinBB60(100);unclassified(100);	0	0	0	0	0	1	0	0	0	0	0
Otu014654	Bacteria(100);Firmicutes(100);unclassified(100);unclassified(100);unclassified(100);unclassified(100);	0	0	0	0	0	1	0	0	0	0	0
Otu014656	Bacteria(100);Firmicutes(100);Clostridia(100);Clostridiales(100);Ruminococcaceae(100);unclassified(100);	0	0	0	0	0	1	0	0	0	0	0
Otu014657	Bacteria(100);Bacteroidetes(100);Bacteroidia(100);Bacteroidales(100);unclassified(100);unclassified(100);	0	0	0	0	0	1	0	0	0	0	0
Otu014658	Bacteria(100);Bacteroidetes(100);unclassified(100);unclassified(100);unclassified(100);unclassified(100);	0	0	0	0	0	1	0	0	0	0	0
Otu014663	Bacteria(100);Bacteroidetes(100);Bacteroidia(100);Bacteroidales(100);unclassified(100);unclassified(100);	0	0	0	0	0	1	0	0	0	0	0
Otu014665	Bacteria(100);Bacteroidetes(100);Bacteroidia(100);Bacteroidales(100);unclassified(100);unclassified(100);	0	0	0	0	0	1	0	0	0	0	0
Otu014672	Bacteria(100);Firmicutes(100);unclassified(100);unclassified(100);unclassified(100);unclassified(100);	0	0	0	0	0	1	0	0	0	0	0
Otu014673	Bacteria(100);unclassified(100);unclassified(100);unclassified(100);unclassified(100);unclassified(100);	0	0	0	0	0	1	0	0	0	0	0
Otu014674	Bacteria(100);Firmicutes(100);Bacilli(100);Lactobacillales(100);unclassified(100);unclassified(100);	0	0	0	0	0	1	0	0	0	0	0
Otu014675	Bacteria(100);Firmicutes(100);unclassified(100);unclassified(100);unclassified(100);unclassified(100);	0	0	0	0	0	1	0	0	0	0	0
Otu014678	Bacteria(100);Firmicutes(100);Clostridia(100);Clostridiales(100);Lachnospiraceae(100);unclassified(100);	0	0	0	0	0	1	0	0	0	0	0
Otu014680	Bacteria(100);Firmicutes(100);Clostridia(100);Clostridiales(100);unclassified(100);unclassified(100);	0	0	0	0	0	1	0	0	0	0	0
Otu014684	Bacteria(100);Tenericutes(100);Mollicutes(100);RF9(100);unclassified(100);unclassified(100);	0	0	0	0	0	1	0	0	0	0	0
Otu014686	Bacteria(100);Firmicutes(100);Negativicutes(100);Selenomonadales(100);Veillonellaceae(100);unclassified(100);	0	0	0	0	0	1	0	0	0	0	0
Otu014687	Bacteria(100);Firmicutes(100);Clostridia(100);Clostridiales(100);Lachnospiraceae(100);unclassified(100);	0	0	0	0	0	1	0	0	0	0	0
Otu014692	Bacteria(100);Bacteroidetes(100);Bacteroidia(100);Bacteroidales(100);ratAN060301C(100);unclassified(100);	0	0	0	0	0	1	0	0	0	0	0
Otu014694	Bacteria(100);Firmicutes(100);Clostridia(100);Clostridiales(100);Lachnospiraceae(100);unclassified(100);	0	0	0	0	0	1	0	0	0	0	0
Otu014697	Bacteria(100);Verrucomicrobia(100);Verrucomicrobiae(100);Verrucomicrobiales(100);Verrucomicrobiaceae(100);Akkermansia(100);	0	0	0	0	0	1	0	0	0	0	0
Otu014699	Bacteria(100);Bacteroidetes(100);Bacteroidia(100);Bacteroidales(100);Porphyromonadaceae(100);Butyricimonas(100);	0	0	0	0	0	1	0	0	0	0	0
Otu014702	Bacteria(100);Firmicutes(100);unclassified(100);unclassified(100);unclassified(100);unclassified(100);	0	0	0	0	0	1	0	0	0	0	0
Otu014705	Bacteria(100);unclassified(100);unclassified(100);unclassified(100);unclassified(100);unclassified(100);	0	0	0	0	0	1	0	0	0	0	0
Otu014706	Bacteria(100);unclassified(100);unclassified(100);unclassified(100);unclassified(100);unclassified(100);	0	0	0	0	0	1	0	0	0	0	0
Otu014707	Bacteria(100);unclassified(100);unclassified(100);unclassified(100);unclassified(100);unclassified(100);	0	0	0	0	0	1	0	0	0	0	0
Otu014708	Bacteria(100);unclassified(100);unclassified(100);unclassified(100);unclassified(100);unclassified(100);	0	0	0	0	0	1	0	0	0	0	0
Otu014717	Bacteria(100);Firmicutes(100);Clostridia(100);Clostridiales(100);unclassified(100);unclassified(100);	0	0	0	0	0	1	0	0	0	0	0
Otu014719	Bacteria(100);Firmicutes(100);Negativicutes(100);Selenomonadales(100);Veillonellaceae(100);unclassified(100);	0	0	0	0	0	1	0	0	0	0	0
Otu014723	Bacteria(100);Firmicutes(100);Clostridia(100);Clostridiales(100);unclassified(100);unclassified(100);	0	0	0	0	0	1	0	0	0	0	0
Otu014724	Bacteria(100);Bacteroidetes(100);Bacteroidia(100);Bacteroidales(100);unclassified(100);unclassified(100);	0	0	0	0	0	1	0	0	0	0	0
Otu014725	Bacteria(100);unclassified(100);unclassified(100);unclassified(100);unclassified(100);unclassified(100);	0	0	0	0	0	1	0	0	0	0	0
Otu014728	Bacteria(100);Firmicutes(100);Clostridia(100);Clostridiales(100);Lachnospiraceae(100);Coprococcus(100);	0	0	0	0	0	1	0	0	0	0	0
Otu014729	Bacteria(100);Bacteroidetes(100);Bacteroidia(100);Bacteroidales(100);unclassified(100);unclassified(100);	0	0	0	0	0	1	0	0	0	0	0
Otu014730	Bacteria(100);Firmicutes(100);Clostridia(100);Clostridiales(100);Ruminococcaceae(100);Faecalibacterium(100);	0	0	0	0	0	1	0	0	0	0	0
Otu014732	Bacteria(100);Bacteroidetes(100);Bacteroidia(100);Bacteroidales(100);unclassified(100);unclassified(100);	0	0	0	0	0	1	0	0	0	0	0
Otu014734	Bacteria(100);Firmicutes(100);Clostridia(100);Clostridiales(100);Lachnospiraceae(100);unclassified(100);	0	0	0	0	0	1	0	0	0	0	0
Otu014736	Bacteria(100);Firmicutes(100);Clostridia(100);Clostridiales(100);Ruminococcaceae(100);unclassified(100);	0	0	0	0	0	1	0	0	0	0	0
Otu014740	Bacteria(100);Bacteroidetes(100);Bacteroidia(100);Bacteroidales(100);unclassified(100);unclassified(100);	0	0	0	0	0	1	0	0	0	0	0
Otu014741	Bacteria(100);unclassified(100);unclassified(100);unclassified(100);unclassified(100);unclassified(100);	0	0	0	0	0	1	0	0	0	0	0
Otu014742	Bacteria(100);Firmicutes(100);unclassified(100);unclassified(100);unclassified(100);unclassified(100);	0	0	0	0	0	1	0	0	0	0	0
Otu014744	Bacteria(100);unclassified(100);unclassified(100);unclassified(100);unclassified(100);unclassified(100);	0	0	0	0	0	1	0	0	0	0	0
Otu014746	Bacteria(100);unclassified(100);unclassified(100);unclassified(100);unclassified(100);unclassified(100);	0	0	0	0	0	1	0	0	0	0	0
Otu014747	Bacteria(100);Bacteroidetes(100);Bacteroidia(100);Bacteroidales(100);ratAN060301C(100);unclassified(100);	0	0	0	0	0	1	0	0	0	0	0
Otu014748	Bacteria(100);Bacteroidetes(100);unclassified(100);unclassified(100);unclassified(100);unclassified(100);	0	0	0	0	0	1	0	0	0	0	0
Otu014755	Bacteria(100);unclassified(100);unclassified(100);unclassified(100);unclassified(100);unclassified(100);	0	0	0	0	0	1	0	0	0	0	0
Otu014758	Bacteria(100);Firmicutes(100);Clostridia(100);Clostridiales(100);Lachnospiraceae(100);unclassified(100);	0	0	0	0	1	0	0	0	0	0	0
Otu014763	Bacteria(100);Firmicutes(100);Clostridia(100);Clostridiales(100);Lachnospiraceae(100);unclassified(100);	0	0	0	0	0	1	0	0	0	0	0
Otu014764	Bacteria(100);unclassified(100);unclassified(100);unclassified(100);unclassified(100);unclassified(100);	0	0	0	0	0	1	0	0	0	0	0
Otu014765	Bacteria(100);unclassified(100);unclassified(100);unclassified(100);unclassified(100);unclassified(100);	0	0	0	0	0	1	0	0	0	0	0
Otu014766	Bacteria(100);unclassified(100);unclassified(100);unclassified(100);unclassified(100);unclassified(100);	0	0	0	0	0	1	0	0	0	0	0
Otu014767	Bacteria(100);Firmicutes(100);Negativicutes(100);Selenomonadales(100);Veillonellaceae(100);unclassified(100);	0	0	0	0	0	1	0	0	0	0	0
Otu014768	Bacteria(100);Firmicutes(100);Clostridia(100);Clostridiales(100);Ruminococcaceae(100);unclassified(100);	0	0	0	0	0	1	0	0	0	0	0
Otu014770	Bacteria(100);unclassified(100);unclassified(100);unclassified(100);unclassified(100);unclassified(100);	0	0	0	0	0	1	0	0	0	0	0
Otu014772	Bacteria(100);Bacteroidetes(100);Bacteroidia(100);Bacteroidales(100);unclassified(100);unclassified(100);	0	0	0	0	0	1	0	0	0	0	0
Otu014773	Bacteria(100);unclassified(100);unclassified(100);unclassified(100);unclassified(100);unclassified(100);	0	0	0	0	0	1	0	0	0	0	0
Otu014775	Bacteria(100);Verrucomicrobia(100);Verrucomicrobiae(100);Verrucomicrobiales(100);Verrucomicrobiaceae(100);Akkermansia(100);	0	0	0	0	0	1	0	0	0	0	0
Otu014776	Bacteria(100);Firmicutes(100);unclassified(100);unclassified(100);unclassified(100);unclassified(100);	0	0	0	0	0	1	0	0	0	0	0
Otu014779	Bacteria(100);Bacteroidetes(100);Bacteroidia(100);Bacteroidales(100);unclassified(100);unclassified(100);	0	0	0	0	0	1	0	0	0	0	0
Otu014784	Bacteria(100);unclassified(100);unclassified(100);unclassified(100);unclassified(100);unclassified(100);	0	0	0	0	0	1	0	0	0	0	0
Otu014790	Bacteria(100);unclassified(100);unclassified(100);unclassified(100);unclassified(100);unclassified(100);	0	0	0	0	0	1	0	0	0	0	0
Otu014792	Bacteria(100);Bacteroidetes(100);unclassified(100);unclassified(100);unclassified(100);unclassified(100);	0	0	0	0	0	1	0	0	0	0	0
Otu014793	Bacteria(100);unclassified(100);unclassified(100);unclassified(100);unclassified(100);unclassified(100);	0	0	0	0	0	1	0	0	0	0	0
Otu014796	Bacteria(100);unclassified(100);unclassified(100);unclassified(100);unclassified(100);unclassified(100);	0	0	0	0	0	1	0	0	0	0	0
Otu014797	Bacteria(100);Bacteroidetes(100);Bacteroidia(100);Bacteroidales(100);unclassified(100);unclassified(100);	0	0	0	0	0	1	0	0	0	0	0
Otu014798	Bacteria(100);Bacteroidetes(100);Bacteroidia(100);Bacteroidales(100);unclassified(100);unclassified(100);	0	0	0	0	0	1	0	0	0	0	0
Otu014799	Bacteria(100);Firmicutes(100);unclassified(100);unclassified(100);unclassified(100);unclassified(100);	0	0	0	0	0	1	0	0	0	0	0
Otu014800	Bacteria(100);Bacteroidetes(100);Bacteroidia(100);Bacteroidales(100);unclassified(100);unclassified(100);	0	0	0	0	0	1	0	0	0	0	0
Otu014802	Bacteria(100);Bacteroidetes(100);Bacteroidia(100);Bacteroidales(100);unclassified(100);unclassified(100);	0	0	0	0	0	1	0	0	0	0	0
Otu014804	Bacteria(100);Bacteroidetes(100);Bacteroidia(100);Bacteroidales(100);unclassified(100);unclassified(100);	0	0	0	0	0	1	0	0	0	0	0
Otu014805	Bacteria(100);Firmicutes(100);Clostridia(100);Clostridiales(100);Ruminococcaceae(100);Faecalibacterium(100);	0	0	0	0	0	1	0	0	0	0	0
Otu014807	Bacteria(100);Bacteroidetes(100);Bacteroidia(100);Bacteroidales(100);unclassified(100);unclassified(100);	0	0	0	0	0	1	0	0	0	0	0
Otu014810	Bacteria(100);Firmicutes(100);Clostridia(100);Clostridiales(100);Lachnospiraceae(100);unclassified(100);	0	0	0	0	0	1	0	0	0	0	0
Otu014821	Bacteria(100);Bacteroidetes(100);Bacteroidia(100);Bacteroidales(100);unclassified(100);unclassified(100);	0	0	0	0	0	1	0	0	0	0	0
Otu014822	Bacteria(100);Tenericutes(100);Mollicutes(100);unclassified(100);unclassified(100);unclassified(100);	0	0	0	0	0	1	0	0	0	0	0
Otu014827	Bacteria(100);unclassified(100);unclassified(100);unclassified(100);unclassified(100);unclassified(100);	0	0	0	0	0	1	0	0	0	0	0
Otu014829	Bacteria(100);Bacteroidetes(100);Bacteroidia(100);Bacteroidales(100);unclassified(100);unclassified(100);	0	0	0	0	0	1	0	0	0	0	0
Otu014834	Bacteria(100);Firmicutes(100);Clostridia(100);Clostridiales(100);unclassified(100);unclassified(100);	0	0	0	0	0	1	0	0	0	0	0
Otu014837	Bacteria(100);Bacteroidetes(100);Bacteroidia(100);Bacteroidales(100);unclassified(100);unclassified(100);	0	0	0	0	0	1	0	0	0	0	0
Otu014839	Bacteria(100);Actinobacteria(100);unclassified(100);unclassified(100);unclassified(100);unclassified(100);	0	0	0	0	0	1	0	0	0	0	0
Otu014840	Bacteria(100);unclassified(100);unclassified(100);unclassified(100);unclassified(100);unclassified(100);	0	0	0	0	0	1	0	0	0	0	0
Otu014843	Bacteria(100);Firmicutes(100);Clostridia(100);Clostridiales(100);Lachnospiraceae(100);Lachnospira(100);	0	0	0	0	0	1	0	0	0	0	0
Otu014845	Bacteria(100);Bacteroidetes(100);Bacteroidia(100);Bacteroidales(100);unclassified(100);unclassified(100);	0	0	0	0	0	1	0	0	0	0	0
Otu014847	Bacteria(100);Firmicutes(100);Clostridia(100);Clostridiales(100);Lachnospiraceae(100);unclassified(100);	0	0	0	0	0	1	0	0	0	0	0
Otu014850	Bacteria(100);unclassified(100);unclassified(100);unclassified(100);unclassified(100);unclassified(100);	0	0	0	0	0	1	0	0	0	0	0
Otu014851	Bacteria(100);unclassified(100);unclassified(100);unclassified(100);unclassified(100);unclassified(100);	0	0	0	0	0	1	0	0	0	0	0
Otu014852	Bacteria(100);Bacteroidetes(100);Bacteroidia(100);Bacteroidales(100);unclassified(100);unclassified(100);	0	0	0	0	0	1	0	0	0	0	0
Otu014854	Bacteria(100);Firmicutes(100);Clostridia(100);Clostridiales(100);Ruminococcaceae(100);Incertae_Sedis(100);	0	0	0	0	0	1	0	0	0	0	0
Otu014859	Bacteria(100);unclassified(100);unclassified(100);unclassified(100);unclassified(100);unclassified(100);	0	0	0	0	0	1	0	0	0	0	0
Otu014861	Bacteria(100);unclassified(100);unclassified(100);unclassified(100);unclassified(100);unclassified(100);	0	0	0	0	0	1	0	0	0	0	0
Otu014864	Bacteria(100);Firmicutes(100);Clostridia(100);Clostridiales(100);unclassified(100);unclassified(100);	0	0	0	0	0	1	0	0	0	0	0
Otu014865	Bacteria(100);Firmicutes(100);Clostridia(100);Clostridiales(100);unclassified(100);unclassified(100);	0	0	0	0	0	1	0	0	0	0	0
Otu014868	Bacteria(100);Firmicutes(100);Clostridia(100);Clostridiales(100);unclassified(100);unclassified(100);	0	0	0	0	0	1	0	0	0	0	0
Otu014871	Bacteria(100);Bacteroidetes(100);Bacteroidia(100);Bacteroidales(100);unclassified(100);unclassified(100);	0	0	0	0	0	1	0	0	0	0	0
Otu014872	Bacteria(100);unclassified(100);unclassified(100);unclassified(100);unclassified(100);unclassified(100);	0	0	0	0	0	1	0	0	0	0	0
Otu014875	Bacteria(100);Firmicutes(100);Clostridia(100);unclassified(100);unclassified(100);unclassified(100);	0	0	0	0	0	1	0	0	0	0	0
Otu014877	Bacteria(100);unclassified(100);unclassified(100);unclassified(100);unclassified(100);unclassified(100);	0	0	0	0	0	1	0	0	0	0	0
Otu014878	Bacteria(100);Bacteroidetes(100);Bacteroidia(100);Bacteroidales(100);unclassified(100);unclassified(100);	0	0	0	0	0	1	0	0	0	0	0
Otu014879	Bacteria(100);Firmicutes(100);Clostridia(100);Clostridiales(100);Lachnospiraceae(100);unclassified(100);	0	0	0	0	0	1	0	0	0	0	0
Otu014881	Bacteria(100);Bacteroidetes(100);Bacteroidia(100);Bacteroidales(100);unclassified(100);unclassified(100);	0	0	0	0	0	1	0	0	0	0	0
Otu014884	Bacteria(100);Bacteroidetes(100);Bacteroidia(100);Bacteroidales(100);unclassified(100);unclassified(100);	0	0	0	0	0	1	0	0	0	0	0
Otu014885	Bacteria(100);Firmicutes(100);Clostridia(100);Clostridiales(100);Lachnospiraceae(100);unclassified(100);	0	0	0	0	0	1	0	0	0	0	0
Otu014886	Bacteria(100);Firmicutes(100);Clostridia(100);Clostridiales(100);Lachnospiraceae(100);unclassified(100);	0	0	0	0	0	1	0	0	0	0	0
Otu014887	Bacteria(100);Tenericutes(100);Mollicutes(100);unclassified(100);unclassified(100);unclassified(100);	0	0	0	0	0	1	0	0	0	0	0
Otu014888	Bacteria(100);Firmicutes(100);Clostridia(100);Clostridiales(100);unclassified(100);unclassified(100);	0	0	0	0	0	1	0	0	0	0	0
Otu014891	Bacteria(100);Firmicutes(100);Clostridia(100);Clostridiales(100);Lachnospiraceae(100);unclassified(100);	0	0	0	0	0	0	1	0	0	0	0
Otu014892	Bacteria(100);Bacteroidetes(100);Bacteroidia(100);Bacteroidales(100);unclassified(100);unclassified(100);	0	0	0	0	0	0	1	0	0	0	0
Otu014893	Bacteria(100);Proteobacteria(100);Gammaproteobacteria(100);Enterobacteriales(100);Enterobacteriaceae(100);unclassified(100);	0	0	0	0	0	0	1	0	0	0	0
Otu014894	Bacteria(100);unclassified(100);unclassified(100);unclassified(100);unclassified(100);unclassified(100);	0	0	0	0	0	0	1	0	0	0	0
Otu014896	Bacteria(100);Proteobacteria(100);Gammaproteobacteria(100);Enterobacteriales(100);Enterobacteriaceae(100);Cosenzaea(100);	0	0	0	0	0	0	1	0	0	0	0
Otu014899	Bacteria(100);Firmicutes(100);Clostridia(100);Clostridiales(100);Lachnospiraceae(100);Incertae_Sedis(100);	0	0	0	0	0	0	1	0	0	0	0
Otu014900	Bacteria(100);unclassified(100);unclassified(100);unclassified(100);unclassified(100);unclassified(100);	0	0	0	0	0	0	1	0	0	0	0
Otu014901	Bacteria(100);unclassified(100);unclassified(100);unclassified(100);unclassified(100);unclassified(100);	0	0	0	0	0	0	1	0	0	0	0
Otu014903	Bacteria(100);Proteobacteria(100);Gammaproteobacteria(100);Enterobacteriales(100);Enterobacteriaceae(100);unclassified(100);	0	0	0	0	0	0	1	0	0	0	0
Otu014905	Bacteria(100);Firmicutes(100);Clostridia(100);Clostridiales(100);Ruminococcaceae(100);unclassified(100);	0	0	0	0	0	0	1	0	0	0	0
Otu014906	Bacteria(100);Bacteroidetes(100);Bacteroidia(100);Bacteroidales(100);unclassified(100);unclassified(100);	0	0	0	0	0	0	1	0	0	0	0
Otu014909	Bacteria(100);Firmicutes(100);Clostridia(100);Clostridiales(100);unclassified(100);unclassified(100);	0	0	0	0	0	0	1	0	0	0	0
Otu014912	Bacteria(100);Firmicutes(100);Clostridia(100);Clostridiales(100);Lachnospiraceae(100);unclassified(100);	0	0	0	0	0	0	1	0	0	0	0
Otu014913	Bacteria(100);Firmicutes(100);Clostridia(100);Clostridiales(100);Lachnospiraceae(100);Coprococcus(100);	0	0	0	0	0	0	1	0	0	0	0
Otu014914	Bacteria(100);Proteobacteria(100);unclassified(100);unclassified(100);unclassified(100);unclassified(100);	0	0	0	0	0	0	1	0	0	0	0
Otu014917	Bacteria(100);Bacteroidetes(100);Bacteroidia(100);Bacteroidales(100);Porphyromonadaceae(100);unclassified(100);	0	0	0	0	0	0	1	0	0	0	0
Otu014919	Bacteria(100);Firmicutes(100);Clostridia(100);Clostridiales(100);Lachnospiraceae(100);unclassified(100);	0	0	0	0	0	0	1	0	0	0	0
Otu014921	Bacteria(100);Firmicutes(100);Negativicutes(100);Selenomonadales(100);Veillonellaceae(100);Dialister(100);	0	0	0	0	0	0	1	0	0	0	0
Otu014922	Bacteria(100);Firmicutes(100);Clostridia(100);Clostridiales(100);Ruminococcaceae(100);Faecalibacterium(100);	0	0	0	0	0	0	1	0	0	0	0
Otu014923	Bacteria(100);Firmicutes(100);Clostridia(100);Clostridiales(100);Lachnospiraceae(100);unclassified(100);	0	0	0	0	0	0	1	0	0	0	0
Otu014926	Bacteria(100);Bacteroidetes(100);Bacteroidia(100);Bacteroidales(100);Porphyromonadaceae(100);Parabacteroides(100);	0	0	0	0	0	0	1	0	0	0	0
Otu014927	Bacteria(100);Firmicutes(100);Negativicutes(100);Selenomonadales(100);Veillonellaceae(100);Dialister(100);	0	0	0	0	0	0	1	0	0	0	0
Otu014928	Bacteria(100);Bacteroidetes(100);Bacteroidia(100);Bacteroidales(100);Porphyromonadaceae(100);Parabacteroides(100);	0	0	0	0	0	0	1	0	0	0	0
Otu014930	Bacteria(100);Bacteroidetes(100);Bacteroidia(100);Bacteroidales(100);unclassified(100);unclassified(100);	0	0	0	0	0	0	1	0	0	0	0
Otu014931	Bacteria(100);Proteobacteria(100);Gammaproteobacteria(100);Enterobacteriales(100);Enterobacteriaceae(100);unclassified(100);	0	0	0	0	0	0	1	0	0	0	0
Otu014936	Bacteria(100);unclassified(100);unclassified(100);unclassified(100);unclassified(100);unclassified(100);	0	0	0	0	0	0	1	0	0	0	0
Otu014940	Bacteria(100);Firmicutes(100);Clostridia(100);Clostridiales(100);Lachnospiraceae(100);unclassified(100);	0	0	0	0	0	0	1	0	0	0	0
Otu014941	Bacteria(100);Firmicutes(100);Negativicutes(100);Selenomonadales(100);Veillonellaceae(100);Dialister(100);	0	0	0	0	0	0	1	0	0	0	0
Otu014942	Bacteria(100);Bacteroidetes(100);Bacteroidia(100);Bacteroidales(100);unclassified(100);unclassified(100);	0	0	0	0	0	0	1	0	0	0	0
Otu014945	Bacteria(100);unclassified(100);unclassified(100);unclassified(100);unclassified(100);unclassified(100);	0	0	0	0	0	0	1	0	0	0	0
Otu014946	Bacteria(100);Bacteroidetes(100);Bacteroidia(100);Bacteroidales(100);unclassified(100);unclassified(100);	0	0	0	0	0	0	1	0	0	0	0
Otu014947	Bacteria(100);Firmicutes(100);Clostridia(100);Clostridiales(100);Lachnospiraceae(100);unclassified(100);	0	0	0	0	0	0	1	0	0	0	0
Otu014949	Bacteria(100);Firmicutes(100);Clostridia(100);Clostridiales(100);Lachnospiraceae(100);unclassified(100);	0	0	0	0	0	0	1	0	0	0	0
Otu014951	Bacteria(100);Firmicutes(100);Negativicutes(100);Selenomonadales(100);Veillonellaceae(100);Dialister(100);	0	0	0	0	0	0	1	0	0	0	0
Otu014953	Bacteria(100);Proteobacteria(100);Gammaproteobacteria(100);Enterobacteriales(100);Enterobacteriaceae(100);Hafnia(100);	0	0	0	0	0	0	1	0	0	0	0
Otu014954	Bacteria(100);unclassified(100);unclassified(100);unclassified(100);unclassified(100);unclassified(100);	0	0	0	0	0	0	1	0	0	0	0
Otu014956	Bacteria(100);unclassified(100);unclassified(100);unclassified(100);unclassified(100);unclassified(100);	0	0	0	0	0	0	1	0	0	0	0
Otu014959	Bacteria(100);Firmicutes(100);Clostridia(100);Clostridiales(100);Lachnospiraceae(100);unclassified(100);	0	0	0	0	0	0	1	0	0	0	0
Otu014960	Bacteria(100);Firmicutes(100);Negativicutes(100);Selenomonadales(100);Veillonellaceae(100);unclassified(100);	0	0	0	0	0	0	1	0	0	0	0
Otu014963	Bacteria(100);Firmicutes(100);Negativicutes(100);Selenomonadales(100);Veillonellaceae(100);Dialister(100);	0	0	0	0	0	0	1	0	0	0	0
Otu014964	Bacteria(100);Bacteroidetes(100);Bacteroidia(100);Bacteroidales(100);unclassified(100);unclassified(100);	0	0	0	0	0	0	1	0	0	0	0
Otu014965	Bacteria(100);Firmicutes(100);Clostridia(100);Clostridiales(100);Clostridiaceae_1(100);Clostridium_sensu_stricto_6(100);	0	0	0	0	0	0	1	0	0	0	0
Otu014966	Bacteria(100);Firmicutes(100);unclassified(100);unclassified(100);unclassified(100);unclassified(100);	0	0	0	0	0	0	1	0	0	0	0
Otu014969	Bacteria(100);Bacteroidetes(100);Bacteroidia(100);Bacteroidales(100);unclassified(100);unclassified(100);	0	0	0	0	0	0	1	0	0	0	0
Otu014970	Bacteria(100);Bacteroidetes(100);Bacteroidia(100);Bacteroidales(100);unclassified(100);unclassified(100);	0	0	0	0	0	0	1	0	0	0	0
Otu014971	Bacteria(100);unclassified(100);unclassified(100);unclassified(100);unclassified(100);unclassified(100);	0	0	0	0	0	0	1	0	0	0	0
Otu014973	Bacteria(100);Firmicutes(100);Clostridia(100);Clostridiales(100);Christensenellaceae(100);unclassified(100);	0	0	0	0	0	0	1	0	0	0	0
Otu014979	Bacteria(100);Firmicutes(100);unclassified(100);unclassified(100);unclassified(100);unclassified(100);	0	0	0	0	0	0	1	0	0	0	0
Otu014980	Bacteria(100);Bacteroidetes(100);Bacteroidia(100);Bacteroidales(100);Prevotellaceae(100);unclassified(100);	0	0	0	0	0	0	1	0	0	0	0
Otu014984	Bacteria(100);Firmicutes(100);Clostridia(100);Clostridiales(100);Peptostreptococcaceae(100);unclassified(100);	0	0	0	0	0	0	1	0	0	0	0
Otu014986	Bacteria(100);Actinobacteria(100);Actinobacteria(100);Bifidobacteriales(100);Bifidobacteriaceae(100);Bifidobacterium(100);	0	0	0	0	0	0	1	0	0	0	0
Otu014987	Bacteria(100);Firmicutes(100);Negativicutes(100);Selenomonadales(100);Veillonellaceae(100);Dialister(100);	0	0	0	0	0	0	1	0	0	0	0
Otu014989	Bacteria(100);unclassified(100);unclassified(100);unclassified(100);unclassified(100);unclassified(100);	0	0	0	0	0	0	1	0	0	0	0
Otu014991	Bacteria(100);unclassified(100);unclassified(100);unclassified(100);unclassified(100);unclassified(100);	0	0	0	0	0	0	1	0	0	0	0
Otu014992	Bacteria(100);Bacteroidetes(100);Bacteroidia(100);Bacteroidales(100);Porphyromonadaceae(100);Barnesiella(100);	0	0	0	0	0	0	1	0	0	0	0
Otu014993	Bacteria(100);Firmicutes(100);Clostridia(100);Clostridiales(100);Ruminococcaceae(100);Subdoligranulum(100);	0	0	0	0	0	0	1	0	0	0	0
Otu014994	Bacteria(100);Bacteroidetes(100);Bacteroidia(100);Bacteroidales(100);Porphyromonadaceae(100);unclassified(100);	0	0	0	0	0	0	1	0	0	0	0
Otu014995	Bacteria(100);Bacteroidetes(100);Bacteroidia(100);Bacteroidales(100);unclassified(100);unclassified(100);	0	0	0	0	0	0	1	0	0	0	0
Otu014997	Bacteria(100);unclassified(100);unclassified(100);unclassified(100);unclassified(100);unclassified(100);	0	0	0	0	0	0	1	0	0	0	0
Otu014999	Bacteria(100);Firmicutes(100);Clostridia(100);Clostridiales(100);Ruminococcaceae(100);Faecalibacterium(100);	0	0	0	0	0	0	1	0	0	0	0
Otu015000	Bacteria(100);unclassified(100);unclassified(100);unclassified(100);unclassified(100);unclassified(100);	0	0	0	0	0	0	1	0	0	0	0
Otu015001	Bacteria(100);Firmicutes(100);Clostridia(100);Clostridiales(100);Lachnospiraceae(100);Incertae_Sedis(100);	0	0	0	0	0	0	1	0	0	0	0
Otu015002	Bacteria(100);Firmicutes(100);Clostridia(100);Clostridiales(100);Lachnospiraceae(100);unclassified(100);	0	0	0	0	0	0	1	0	0	0	0
Otu015006	Bacteria(100);Actinobacteria(100);Coriobacteriia(100);Coriobacteriales(100);Coriobacteriaceae(100);unclassified(100);	0	0	0	0	0	0	1	0	0	0	0
Otu015008	Bacteria(100);Actinobacteria(100);Coriobacteriia(100);Coriobacteriales(100);Coriobacteriaceae(100);Enterorhabdus(100);	0	0	0	0	0	0	1	0	0	0	0
Otu015010	Bacteria(100);Actinobacteria(100);Coriobacteriia(100);Coriobacteriales(100);Coriobacteriaceae(100);unclassified(100);	0	0	0	0	0	0	1	0	0	0	0
Otu015011	Bacteria(100);Bacteroidetes(100);Bacteroidia(100);Bacteroidales(100);unclassified(100);unclassified(100);	0	0	0	0	0	0	1	0	0	0	0
Otu015013	Bacteria(100);Firmicutes(100);Clostridia(100);Clostridiales(100);Ruminococcaceae(100);unclassified(100);	0	0	0	0	0	0	1	0	0	0	0
Otu015014	Bacteria(100);Bacteroidetes(100);Bacteroidia(100);Bacteroidales(100);Prevotellaceae(100);Prevotella(100);	0	0	0	0	0	0	1	0	0	0	0
Otu015017	Bacteria(100);Firmicutes(100);Clostridia(100);Clostridiales(100);unclassified(100);unclassified(100);	0	0	0	0	0	0	1	0	0	0	0
Otu015018	Bacteria(100);Firmicutes(100);Clostridia(100);Clostridiales(100);Lachnospiraceae(100);unclassified(100);	0	0	0	0	0	0	1	0	0	0	0
Otu015019	Bacteria(100);Proteobacteria(100);Gammaproteobacteria(100);Enterobacteriales(100);Enterobacteriaceae(100);unclassified(100);	0	0	0	0	0	0	1	0	0	0	0
Otu015020	Bacteria(100);Verrucomicrobia(100);Verrucomicrobiae(100);Verrucomicrobiales(100);Verrucomicrobiaceae(100);Akkermansia(100);	0	0	0	0	0	0	0	1	0	0	0
Otu015021	Bacteria(100);Tenericutes(100);Mollicutes(100);NB1-n(100);unclassified(100);unclassified(100);	0	0	0	0	0	0	0	1	0	0	0
Otu015025	Bacteria(100);Firmicutes(100);Clostridia(100);Clostridiales(100);Lachnospiraceae(100);Lachnospira(100);	0	0	0	0	0	0	0	1	0	0	0
Otu015026	Bacteria(100);unclassified(100);unclassified(100);unclassified(100);unclassified(100);unclassified(100);	0	0	0	0	0	0	0	1	0	0	0
Otu015027	Bacteria(100);unclassified(100);unclassified(100);unclassified(100);unclassified(100);unclassified(100);	0	0	0	0	0	0	0	1	0	0	0
Otu015029	Bacteria(100);Verrucomicrobia(100);Verrucomicrobiae(100);Verrucomicrobiales(100);Verrucomicrobiaceae(100);Akkermansia(100);	0	0	0	0	0	0	0	1	0	0	0
Otu015030	Bacteria(100);Firmicutes(100);unclassified(100);unclassified(100);unclassified(100);unclassified(100);	0	0	0	0	0	0	1	0	0	0	0
Otu015031	Bacteria(100);Bacteroidetes(100);Bacteroidia(100);Bacteroidales(100);unclassified(100);unclassified(100);	0	0	0	0	0	0	1	0	0	0	0
Otu015032	Bacteria(100);Firmicutes(100);Negativicutes(100);Selenomonadales(100);Veillonellaceae(100);Dialister(100);	0	0	0	0	0	0	1	0	0	0	0
Otu015033	Bacteria(100);Proteobacteria(100);Gammaproteobacteria(100);Enterobacteriales(100);Enterobacteriaceae(100);unclassified(100);	0	0	0	0	0	0	1	0	0	0	0
Otu015037	Bacteria(100);Firmicutes(100);Negativicutes(100);Selenomonadales(100);Veillonellaceae(100);Dialister(100);	0	0	0	0	0	0	1	0	0	0	0
Otu015039	Bacteria(100);Firmicutes(100);Negativicutes(100);Selenomonadales(100);Veillonellaceae(100);Dialister(100);	0	0	0	0	0	0	1	0	0	0	0
Otu015040	Bacteria(100);Firmicutes(100);Clostridia(100);Clostridiales(100);Clostridiaceae_1(100);unclassified(100);	0	0	0	0	0	0	1	0	0	0	0
Otu015041	Bacteria(100);Bacteroidetes(100);Bacteroidia(100);Bacteroidales(100);unclassified(100);unclassified(100);	0	0	0	0	0	0	1	0	0	0	0
Otu015043	Bacteria(100);Firmicutes(100);Clostridia(100);Clostridiales(100);Ruminococcaceae(100);unclassified(100);	0	0	0	0	0	0	1	0	0	0	0
Otu015048	Bacteria(100);Firmicutes(100);unclassified(100);unclassified(100);unclassified(100);unclassified(100);	0	0	0	0	0	0	1	0	0	0	0
Otu015049	Bacteria(100);unclassified(100);unclassified(100);unclassified(100);unclassified(100);unclassified(100);	0	0	0	0	0	0	1	0	0	0	0
Otu015050	Bacteria(100);Bacteroidetes(100);Bacteroidia(100);Bacteroidales(100);Prevotellaceae(100);Prevotella(100);	0	0	0	0	0	0	1	0	0	0	0
Otu015052	Bacteria(100);Proteobacteria(100);Betaproteobacteria(100);Burkholderiales(100);Alcaligenaceae(100);Parasutterella(100);	0	0	0	0	0	0	1	0	0	0	0
Otu015054	Bacteria(100);Firmicutes(100);unclassified(100);unclassified(100);unclassified(100);unclassified(100);	0	0	0	0	0	0	1	0	0	0	0
Otu015058	Bacteria(100);Firmicutes(100);Clostridia(100);Clostridiales(100);Lachnospiraceae(100);unclassified(100);	0	0	0	0	0	0	1	0	0	0	0
Otu015060	Bacteria(100);Firmicutes(100);Clostridia(100);Clostridiales(100);Lachnospiraceae(100);unclassified(100);	0	0	0	0	0	0	1	0	0	0	0
Otu015061	Bacteria(100);Proteobacteria(100);Gammaproteobacteria(100);Enterobacteriales(100);Enterobacteriaceae(100);unclassified(100);	0	0	0	0	0	0	1	0	0	0	0
Otu015062	Bacteria(100);Bacteroidetes(100);Bacteroidia(100);Bacteroidales(100);unclassified(100);unclassified(100);	0	0	0	0	0	0	1	0	0	0	0
Otu015063	Bacteria(100);unclassified(100);unclassified(100);unclassified(100);unclassified(100);unclassified(100);	0	0	0	0	0	0	1	0	0	0	0
Otu015064	Bacteria(100);Bacteroidetes(100);Bacteroidia(100);Bacteroidales(100);Porphyromonadaceae(100);Parabacteroides(100);	0	0	0	0	0	0	1	0	0	0	0
Otu015065	Bacteria(100);Bacteroidetes(100);Bacteroidia(100);Bacteroidales(100);Bacteroidaceae(100);Bacteroides(100);	0	0	0	0	0	0	1	0	0	0	0
Otu015067	Bacteria(100);Firmicutes(100);Clostridia(100);Clostridiales(100);Clostridiaceae_1(100);unclassified(100);	0	0	0	0	0	0	1	0	0	0	0
Otu015068	Bacteria(100);Proteobacteria(100);Gammaproteobacteria(100);Enterobacteriales(100);Enterobacteriaceae(100);unclassified(100);	0	0	0	0	0	0	1	0	0	0	0
Otu015070	Bacteria(100);unclassified(100);unclassified(100);unclassified(100);unclassified(100);unclassified(100);	0	0	0	0	0	0	1	0	0	0	0
Otu015071	Bacteria(100);Bacteroidetes(100);Bacteroidia(100);Bacteroidales(100);unclassified(100);unclassified(100);	0	0	0	0	0	0	1	0	0	0	0
Otu015074	Bacteria(100);Proteobacteria(100);Gammaproteobacteria(100);Enterobacteriales(100);Enterobacteriaceae(100);Buttiauxella(100);	0	0	0	0	0	0	1	0	0	0	0
Otu015079	Bacteria(100);unclassified(100);unclassified(100);unclassified(100);unclassified(100);unclassified(100);	0	0	0	0	0	0	1	0	0	0	0
Otu015082	Bacteria(100);Firmicutes(100);Clostridia(100);Clostridiales(100);Lachnospiraceae(100);unclassified(100);	0	0	0	0	0	0	1	0	0	0	0
Otu015084	Bacteria(100);Firmicutes(100);Clostridia(100);Clostridiales(100);Ruminococcaceae(100);Faecalibacterium(100);	0	0	0	0	0	0	1	0	0	0	0
Otu015086	Bacteria(100);Bacteroidetes(100);Bacteroidia(100);Bacteroidales(100);unclassified(100);unclassified(100);	0	0	0	0	0	0	1	0	0	0	0
Otu015087	Bacteria(100);Firmicutes(100);Clostridia(100);Clostridiales(100);unclassified(100);unclassified(100);	0	0	0	0	0	0	1	0	0	0	0
Otu015088	Bacteria(100);unclassified(100);unclassified(100);unclassified(100);unclassified(100);unclassified(100);	0	0	0	0	0	0	1	0	0	0	0
Otu015091	Bacteria(100);Firmicutes(100);Clostridia(100);Clostridiales(100);Clostridiaceae_1(100);unclassified(100);	0	0	0	0	0	0	1	0	0	0	0
Otu015092	Bacteria(100);Proteobacteria(100);Gammaproteobacteria(100);Enterobacteriales(100);Enterobacteriaceae(100);unclassified(100);	0	0	0	0	0	0	1	0	0	0	0
Otu015093	Bacteria(100);Firmicutes(100);Negativicutes(100);Selenomonadales(100);Veillonellaceae(100);Dialister(100);	0	0	0	0	0	0	1	0	0	0	0
Otu015095	Bacteria(100);Bacteroidetes(100);Bacteroidia(100);Bacteroidales(100);unclassified(100);unclassified(100);	0	0	0	0	0	0	1	0	0	0	0
Otu015096	Bacteria(100);Firmicutes(100);unclassified(100);unclassified(100);unclassified(100);unclassified(100);	0	0	0	0	0	0	1	0	0	0	0
Otu015097	Bacteria(100);Proteobacteria(100);Gammaproteobacteria(100);Enterobacteriales(100);Enterobacteriaceae(100);Cosenzaea(100);	0	0	0	0	0	0	1	0	0	0	0
Otu015098	Bacteria(100);Firmicutes(100);Clostridia(100);Clostridiales(100);Ruminococcaceae(100);unclassified(100);	0	0	0	0	0	0	1	0	0	0	0
Otu015099	Bacteria(100);Firmicutes(100);Clostridia(100);unclassified(100);unclassified(100);unclassified(100);	0	0	0	0	0	0	1	0	0	0	0
Otu015102	Bacteria(100);unclassified(100);unclassified(100);unclassified(100);unclassified(100);unclassified(100);	0	0	0	0	0	0	1	0	0	0	0
Otu015105	Bacteria(100);unclassified(100);unclassified(100);unclassified(100);unclassified(100);unclassified(100);	0	0	0	0	0	0	1	0	0	0	0
Otu015107	Bacteria(100);Firmicutes(100);Clostridia(100);Clostridiales(100);unclassified(100);unclassified(100);	0	0	0	0	0	0	1	0	0	0	0
Otu015113	Bacteria(100);Firmicutes(100);Negativicutes(100);Selenomonadales(100);Veillonellaceae(100);unclassified(100);	0	0	0	0	0	1	0	0	0	0	0
Otu015114	Bacteria(100);Bacteroidetes(100);Bacteroidia(100);Bacteroidales(100);unclassified(100);unclassified(100);	0	0	0	0	0	1	0	0	0	0	0
Otu015115	Bacteria(100);Bacteroidetes(100);Bacteroidia(100);Bacteroidales(100);unclassified(100);unclassified(100);	0	0	0	0	0	1	0	0	0	0	0
Otu015119	Bacteria(100);unclassified(100);unclassified(100);unclassified(100);unclassified(100);unclassified(100);	0	0	0	0	0	1	0	0	0	0	0
Otu015121	Bacteria(100);Bacteroidetes(100);Bacteroidia(100);Bacteroidales(100);Porphyromonadaceae(100);Barnesiella(100);	0	0	0	0	0	0	1	0	0	0	0
Otu015122	Bacteria(100);Firmicutes(100);Clostridia(100);Clostridiales(100);Lachnospiraceae(100);unclassified(100);	0	0	0	0	0	0	1	0	0	0	0
Otu015124	Bacteria(100);Bacteroidetes(100);Bacteroidia(100);Bacteroidales(100);Porphyromonadaceae(100);Parabacteroides(100);	0	0	0	0	0	0	1	0	0	0	0
Otu015125	Bacteria(100);Firmicutes(100);Clostridia(100);Clostridiales(100);Clostridiaceae_1(100);unclassified(100);	0	0	0	0	0	0	1	0	0	0	0
Otu015128	Bacteria(100);unclassified(100);unclassified(100);unclassified(100);unclassified(100);unclassified(100);	0	0	0	0	0	0	1	0	0	0	0
Otu015130	Bacteria(100);Proteobacteria(100);Gammaproteobacteria(100);Enterobacteriales(100);Enterobacteriaceae(100);unclassified(100);	0	0	0	0	0	0	1	0	0	0	0
Otu015132	Bacteria(100);Firmicutes(100);Negativicutes(100);Selenomonadales(100);Veillonellaceae(100);Dialister(100);	0	0	0	0	0	0	1	0	0	0	0
Otu015135	Bacteria(100);Bacteroidetes(100);Bacteroidia(100);Bacteroidales(100);Porphyromonadaceae(100);unclassified(100);	0	0	0	0	0	0	1	0	0	0	0
Otu015137	Bacteria(100);unclassified(100);unclassified(100);unclassified(100);unclassified(100);unclassified(100);	0	0	0	0	0	0	1	0	0	0	0
Otu015140	Bacteria(100);Firmicutes(100);unclassified(100);unclassified(100);unclassified(100);unclassified(100);	0	0	0	0	0	0	1	0	0	0	0
Otu015141	Bacteria(100);Firmicutes(100);Clostridia(100);Clostridiales(100);Lachnospiraceae(100);unclassified(100);	0	0	0	0	0	0	1	0	0	0	0
Otu015142	Bacteria(100);Firmicutes(100);Clostridia(100);Clostridiales(100);Ruminococcaceae(100);Faecalibacterium(100);	0	0	0	0	0	0	1	0	0	0	0
Otu015144	Bacteria(100);Firmicutes(100);Clostridia(100);Clostridiales(100);unclassified(100);unclassified(100);	0	0	0	0	0	0	1	0	0	0	0
Otu015147	Bacteria(100);Firmicutes(100);Clostridia(100);Clostridiales(100);Lachnospiraceae(100);unclassified(100);	0	0	0	0	0	1	0	0	0	0	0
Otu015156	Bacteria(100);Tenericutes(100);Mollicutes(100);NB1-n(100);unclassified(100);unclassified(100);	0	0	0	0	0	1	0	0	0	0	0
Otu015158	Bacteria(100);unclassified(100);unclassified(100);unclassified(100);unclassified(100);unclassified(100);	0	0	0	0	0	1	0	0	0	0	0
Otu015159	Bacteria(100);unclassified(100);unclassified(100);unclassified(100);unclassified(100);unclassified(100);	0	0	0	0	0	1	0	0	0	0	0
Otu015160	Bacteria(100);Firmicutes(100);Negativicutes(100);Selenomonadales(100);unclassified(100);unclassified(100);	0	0	0	0	0	1	0	0	0	0	0
Otu015162	Bacteria(100);unclassified(100);unclassified(100);unclassified(100);unclassified(100);unclassified(100);	0	0	0	0	0	1	0	0	0	0	0
Otu015164	Bacteria(100);Firmicutes(100);Clostridia(100);Clostridiales(100);Ruminococcaceae(100);unclassified(100);	0	0	0	0	0	1	0	0	0	0	0
Otu015166	Bacteria(100);Firmicutes(100);Negativicutes(100);Selenomonadales(100);unclassified(100);unclassified(100);	0	0	0	0	0	1	0	0	0	0	0
Otu015168	Bacteria(100);unclassified(100);unclassified(100);unclassified(100);unclassified(100);unclassified(100);	0	0	0	0	0	1	0	0	0	0	0
Otu015169	Bacteria(100);Firmicutes(100);Clostridia(100);Clostridiales(100);Ruminococcaceae(100);Ruminococcus(100);	0	0	0	0	0	1	0	0	0	0	0
Otu015170	Bacteria(100);Bacteroidetes(100);Bacteroidia(100);Bacteroidales(100);unclassified(100);unclassified(100);	0	0	0	0	0	1	0	0	0	0	0
Otu015171	Bacteria(100);Bacteroidetes(100);Bacteroidia(100);Bacteroidales(100);unclassified(100);unclassified(100);	0	0	0	0	0	1	0	0	0	0	0
Otu015172	Bacteria(100);Firmicutes(100);Clostridia(100);unclassified(100);unclassified(100);unclassified(100);	0	0	0	0	0	1	0	0	0	0	0
Otu015176	Bacteria(100);Firmicutes(100);Clostridia(100);Clostridiales(100);Lachnospiraceae(100);unclassified(100);	0	0	0	0	0	1	0	0	0	0	0
Otu015179	Bacteria(100);Bacteroidetes(100);Bacteroidia(100);Bacteroidales(100);unclassified(100);unclassified(100);	0	0	0	0	0	1	0	0	0	0	0
Otu015182	Bacteria(100);unclassified(100);unclassified(100);unclassified(100);unclassified(100);unclassified(100);	0	0	0	0	0	1	0	0	0	0	0
Otu015183	Bacteria(100);unclassified(100);unclassified(100);unclassified(100);unclassified(100);unclassified(100);	0	0	0	0	0	1	0	0	0	0	0
Otu015185	Bacteria(100);Proteobacteria(100);Gammaproteobacteria(100);Enterobacteriales(100);Enterobacteriaceae(100);Hafnia(100);	0	0	0	0	0	0	1	0	0	0	0
Otu015186	Bacteria(100);Firmicutes(100);Clostridia(100);Clostridiales(100);unclassified(100);unclassified(100);	0	0	0	0	0	1	0	0	0	0	0
Otu015190	Bacteria(100);Actinobacteria(100);Actinobacteria(100);Pseudonocardiales(100);Pseudonocardiaceae(100);unclassified(100);	0	0	0	0	0	1	0	0	0	0	0
Otu015194	Bacteria(100);Bacteroidetes(100);Bacteroidia(100);Bacteroidales(100);unclassified(100);unclassified(100);	0	0	0	0	0	1	0	0	0	0	0
Otu015196	Bacteria(100);Firmicutes(100);Clostridia(100);Clostridiales(100);Lachnospiraceae(100);unclassified(100);	0	0	0	0	0	1	0	0	0	0	0
Otu015199	Bacteria(100);Proteobacteria(100);Gammaproteobacteria(100);Enterobacteriales(100);Enterobacteriaceae(100);unclassified(100);	0	0	0	0	0	0	1	0	0	0	0
Otu015200	Bacteria(100);unclassified(100);unclassified(100);unclassified(100);unclassified(100);unclassified(100);	0	0	0	0	0	0	1	0	0	0	0
Otu015202	Bacteria(100);Bacteroidetes(100);Bacteroidia(100);Bacteroidales(100);unclassified(100);unclassified(100);	0	0	0	0	0	0	1	0	0	0	0
Otu015203	Bacteria(100);Proteobacteria(100);Gammaproteobacteria(100);Enterobacteriales(100);Enterobacteriaceae(100);Hafnia(100);	0	0	0	0	0	0	1	0	0	0	0
Otu015204	Bacteria(100);Proteobacteria(100);Gammaproteobacteria(100);Enterobacteriales(100);Enterobacteriaceae(100);unclassified(100);	0	0	0	0	0	0	1	0	0	0	0
Otu015208	Bacteria(100);Bacteroidetes(100);Bacteroidia(100);Bacteroidales(100);Porphyromonadaceae(100);Parabacteroides(100);	0	0	0	0	0	0	1	0	0	0	0
Otu015209	Bacteria(100);Firmicutes(100);Clostridia(100);Clostridiales(100);unclassified(100);unclassified(100);	0	0	0	0	0	0	1	0	0	0	0
Otu015210	Bacteria(100);Firmicutes(100);Clostridia(100);Clostridiales(100);Ruminococcaceae(100);unclassified(100);	0	0	0	0	0	0	1	0	0	0	0
Otu015211	Bacteria(100);Bacteroidetes(100);Bacteroidia(100);Bacteroidales(100);Porphyromonadaceae(100);unclassified(100);	0	0	0	0	0	0	1	0	0	0	0
Otu015212	Bacteria(100);Firmicutes(100);Clostridia(100);Clostridiales(100);Ruminococcaceae(100);Incertae_Sedis(100);	0	0	0	0	0	0	1	0	0	0	0
Otu015214	Bacteria(100);unclassified(100);unclassified(100);unclassified(100);unclassified(100);unclassified(100);	0	0	0	0	0	0	1	0	0	0	0
Otu015217	Bacteria(100);Firmicutes(100);unclassified(100);unclassified(100);unclassified(100);unclassified(100);	0	0	0	0	0	0	1	0	0	0	0
Otu015220	Bacteria(100);Firmicutes(100);Clostridia(100);Clostridiales(100);Christensenellaceae(100);unclassified(100);	0	0	0	0	0	0	1	0	0	0	0
Otu015221	Bacteria(100);Firmicutes(100);Clostridia(100);Clostridiales(100);unclassified(100);unclassified(100);	0	0	0	0	0	0	1	0	0	0	0
Otu015222	Bacteria(100);Firmicutes(100);unclassified(100);unclassified(100);unclassified(100);unclassified(100);	0	0	0	0	0	0	1	0	0	0	0
Otu015225	Bacteria(100);unclassified(100);unclassified(100);unclassified(100);unclassified(100);unclassified(100);	0	0	0	0	0	0	1	0	0	0	0
Otu015228	Bacteria(100);Firmicutes(100);Clostridia(100);Clostridiales(100);Ruminococcaceae(100);Intestinimonas(100);	0	0	0	0	0	0	1	0	0	0	0
Otu015229	Bacteria(100);unclassified(100);unclassified(100);unclassified(100);unclassified(100);unclassified(100);	0	0	0	0	0	0	1	0	0	0	0
Otu015230	Bacteria(100);Firmicutes(100);Clostridia(100);Clostridiales(100);unclassified(100);unclassified(100);	0	0	0	0	0	0	1	0	0	0	0
Otu015231	Bacteria(100);unclassified(100);unclassified(100);unclassified(100);unclassified(100);unclassified(100);	0	0	0	0	0	0	1	0	0	0	0
Otu015233	Bacteria(100);Bacteroidetes(100);Bacteroidia(100);Bacteroidales(100);unclassified(100);unclassified(100);	0	0	0	0	0	0	1	0	0	0	0
Otu015234	Bacteria(100);unclassified(100);unclassified(100);unclassified(100);unclassified(100);unclassified(100);	0	0	0	0	0	0	1	0	0	0	0
Otu015235	Bacteria(100);Firmicutes(100);Clostridia(100);Clostridiales(100);Peptococcaceae(100);Dehalobacterium(100);	0	0	0	0	0	0	1	0	0	0	0
Otu015236	Bacteria(100);Bacteroidetes(100);Bacteroidia(100);Bacteroidales(100);Rikenellaceae(100);Alistipes(100);	0	0	0	0	0	0	1	0	0	0	0
Otu015237	Bacteria(100);Firmicutes(100);Clostridia(100);Clostridiales(100);unclassified(100);unclassified(100);	0	0	0	0	0	0	1	0	0	0	0
Otu015238	Bacteria(100);Bacteroidetes(100);Bacteroidia(100);Bacteroidales(100);unclassified(100);unclassified(100);	0	0	0	0	0	0	1	0	0	0	0
Otu015239	Bacteria(100);Bacteroidetes(100);Bacteroidia(100);Bacteroidales(100);Porphyromonadaceae(100);Parabacteroides(100);	0	0	0	0	0	0	1	0	0	0	0
Otu015240	Bacteria(100);Bacteroidetes(100);unclassified(100);unclassified(100);unclassified(100);unclassified(100);	0	0	0	0	0	0	1	0	0	0	0
Otu015246	Bacteria(100);Firmicutes(100);Negativicutes(100);Selenomonadales(100);Veillonellaceae(100);Dialister(100);	0	0	0	0	0	0	1	0	0	0	0
Otu015255	Bacteria(100);Bacteroidetes(100);Bacteroidia(100);Bacteroidales(100);Porphyromonadaceae(100);unclassified(100);	0	0	0	0	0	0	1	0	0	0	0
Otu015257	Bacteria(100);Proteobacteria(100);Gammaproteobacteria(100);Enterobacteriales(100);Enterobacteriaceae(100);unclassified(100);	0	0	0	0	0	0	1	0	0	0	0
Otu015258	Bacteria(100);Bacteroidetes(100);Bacteroidia(100);Bacteroidales(100);Porphyromonadaceae(100);unclassified(100);	0	0	0	0	0	0	1	0	0	0	0
Otu015259	Bacteria(100);Proteobacteria(100);Gammaproteobacteria(100);Enterobacteriales(100);Enterobacteriaceae(100);unclassified(100);	0	0	0	0	0	0	1	0	0	0	0
Otu015260	Bacteria(100);Actinobacteria(100);Coriobacteriia(100);Coriobacteriales(100);Coriobacteriaceae(100);unclassified(100);	0	0	0	0	0	0	1	0	0	0	0
Otu015264	Bacteria(100);Firmicutes(100);Negativicutes(100);Selenomonadales(100);Veillonellaceae(100);Dialister(100);	0	0	0	0	0	0	1	0	0	0	0
Otu015266	Bacteria(100);Firmicutes(100);unclassified(100);unclassified(100);unclassified(100);unclassified(100);	0	0	0	0	0	0	1	0	0	0	0
Otu015267	Bacteria(100);Bacteroidetes(100);unclassified(100);unclassified(100);unclassified(100);unclassified(100);	0	0	0	0	0	0	1	0	0	0	0
Otu015268	Bacteria(100);Bacteroidetes(100);Bacteroidia(100);Bacteroidales(100);Porphyromonadaceae(100);Parabacteroides(100);	0	0	0	0	0	0	1	0	0	0	0
Otu015270	Bacteria(100);Firmicutes(100);unclassified(100);unclassified(100);unclassified(100);unclassified(100);	0	0	0	0	0	0	1	0	0	0	0
Otu015271	Bacteria(100);Bacteroidetes(100);unclassified(100);unclassified(100);unclassified(100);unclassified(100);	0	0	0	0	0	0	1	0	0	0	0
Otu015273	Bacteria(100);Proteobacteria(100);Gammaproteobacteria(100);Enterobacteriales(100);Enterobacteriaceae(100);unclassified(100);	0	0	0	0	0	0	1	0	0	0	0
Otu015275	Bacteria(100);Firmicutes(100);Negativicutes(100);Selenomonadales(100);Veillonellaceae(100);Dialister(100);	0	0	0	0	0	0	1	0	0	0	0
Otu015276	Bacteria(100);Firmicutes(100);Negativicutes(100);Selenomonadales(100);Veillonellaceae(100);Dialister(100);	0	0	0	0	0	0	1	0	0	0	0
Otu015278	Bacteria(100);Firmicutes(100);Negativicutes(100);Selenomonadales(100);Veillonellaceae(100);Dialister(100);	0	0	0	0	0	0	1	0	0	0	0
Otu015279	Bacteria(100);Firmicutes(100);Clostridia(100);Clostridiales(100);Ruminococcaceae(100);Faecalibacterium(100);	0	0	0	0	0	0	1	0	0	0	0
Otu015280	Bacteria(100);Bacteroidetes(100);unclassified(100);unclassified(100);unclassified(100);unclassified(100);	0	0	0	0	0	0	1	0	0	0	0
Otu015281	Bacteria(100);Actinobacteria(100);Actinobacteria(100);Bifidobacteriales(100);Bifidobacteriaceae(100);Bifidobacterium(100);	0	0	0	0	0	0	1	0	0	0	0
Otu015282	Bacteria(100);unclassified(100);unclassified(100);unclassified(100);unclassified(100);unclassified(100);	0	0	0	0	0	0	1	0	0	0	0
Otu015285	Bacteria(100);Firmicutes(100);Clostridia(100);Clostridiales(100);Ruminococcaceae(100);Faecalibacterium(100);	0	0	0	0	0	0	1	0	0	0	0
Otu015286	Bacteria(100);Firmicutes(100);Negativicutes(100);Selenomonadales(100);Veillonellaceae(100);Dialister(100);	0	0	0	0	0	0	1	0	0	0	0
Otu015291	Bacteria(100);Bacteroidetes(100);Bacteroidia(100);Bacteroidales(100);Porphyromonadaceae(100);Parabacteroides(100);	0	0	0	0	0	0	1	0	0	0	0
Otu015292	Bacteria(100);unclassified(100);unclassified(100);unclassified(100);unclassified(100);unclassified(100);	0	0	0	0	0	0	1	0	0	0	0
Otu015293	Bacteria(100);unclassified(100);unclassified(100);unclassified(100);unclassified(100);unclassified(100);	0	0	0	0	0	0	1	0	0	0	0
Otu015294	Bacteria(100);Firmicutes(100);unclassified(100);unclassified(100);unclassified(100);unclassified(100);	0	0	0	0	0	0	1	0	0	0	0
Otu015297	Bacteria(100);unclassified(100);unclassified(100);unclassified(100);unclassified(100);unclassified(100);	0	0	0	0	0	0	1	0	0	0	0
Otu015298	Bacteria(100);Bacteroidetes(100);Bacteroidia(100);Bacteroidales(100);Prevotellaceae(100);Prevotella(100);	0	0	0	0	0	0	1	0	0	0	0
Otu015522	Bacteria(100);unclassified(100);unclassified(100);unclassified(100);unclassified(100);unclassified(100);	0	0	0	0	0	0	0	0	0	0	1
Otu015526	Bacteria(100);Bacteroidetes(100);unclassified(100);unclassified(100);unclassified(100);unclassified(100);	0	0	0	0	0	0	0	0	0	0	1
Otu015529	Bacteria(100);Firmicutes(100);Clostridia(100);Clostridiales(100);Lachnospiraceae(100);unclassified(100);	0	0	0	0	0	0	0	0	0	0	1
Otu015557	Bacteria(100);Firmicutes(100);Clostridia(100);Clostridiales(100);unclassified(100);unclassified(100);	0	0	0	0	0	0	0	0	0	0	1
Otu015563	Bacteria(100);Firmicutes(100);Clostridia(100);Clostridiales(100);Lachnospiraceae(100);unclassified(100);	0	0	0	0	0	0	0	0	0	0	1
Otu015573	Bacteria(100);Firmicutes(100);Clostridia(100);Clostridiales(100);unclassified(100);unclassified(100);	0	0	0	0	0	0	0	0	0	0	1
Otu015574	Bacteria(100);Bacteroidetes(100);Bacteroidia(100);Bacteroidales(100);unclassified(100);unclassified(100);	0	0	0	0	0	0	0	0	0	0	1
Otu015575	Bacteria(100);unclassified(100);unclassified(100);unclassified(100);unclassified(100);unclassified(100);	0	0	0	0	0	0	0	0	0	0	1
Otu015581	Bacteria(100);Firmicutes(100);Clostridia(100);Clostridiales(100);Lachnospiraceae(100);unclassified(100);	0	0	0	0	0	0	0	0	0	0	1
Otu015583	Bacteria(100);unclassified(100);unclassified(100);unclassified(100);unclassified(100);unclassified(100);	0	0	0	0	0	0	0	0	0	0	1
Otu015584	Bacteria(100);Firmicutes(100);Clostridia(100);Clostridiales(100);Lachnospiraceae(100);unclassified(100);	0	0	0	0	0	0	0	0	0	0	1
Otu015585	Bacteria(100);Firmicutes(100);Clostridia(100);Clostridiales(100);Lachnospiraceae(100);unclassified(100);	0	0	0	0	0	0	0	0	0	0	1
Otu015588	Bacteria(100);Firmicutes(100);Clostridia(100);Clostridiales(100);Ruminococcaceae(100);Subdoligranulum(100);	0	0	0	0	0	0	0	0	0	0	1
Otu015590	Bacteria(100);unclassified(100);unclassified(100);unclassified(100);unclassified(100);unclassified(100);	0	0	0	0	0	0	0	0	0	0	1
Otu015593	Bacteria(100);Bacteroidetes(100);Bacteroidia(100);Bacteroidales(100);unclassified(100);unclassified(100);	0	0	0	0	0	0	0	0	0	0	1
Otu015597	Bacteria(100);Firmicutes(100);Clostridia(100);Clostridiales(100);Lachnospiraceae(100);Anaerostipes(100);	0	0	0	0	0	0	0	0	0	0	1
Otu015599	Bacteria(100);Firmicutes(100);Clostridia(100);Clostridiales(100);Ruminococcaceae(100);Ruminococcus(100);	0	0	0	0	0	0	0	0	0	0	1
Otu015600	Bacteria(100);unclassified(100);unclassified(100);unclassified(100);unclassified(100);unclassified(100);	0	0	0	0	0	0	0	0	0	0	1
Otu015603	Bacteria(100);unclassified(100);unclassified(100);unclassified(100);unclassified(100);unclassified(100);	0	0	0	0	0	0	0	0	0	0	1
Otu015604	Bacteria(100);Firmicutes(100);Clostridia(100);Clostridiales(100);Lachnospiraceae(100);unclassified(100);	0	0	0	0	0	0	0	0	0	0	1
Otu016105	Bacteria(100);unclassified(100);unclassified(100);unclassified(100);unclassified(100);unclassified(100);	0	0	0	0	0	0	0	0	0	0	1
Otu016117	Bacteria(100);unclassified(100);unclassified(100);unclassified(100);unclassified(100);unclassified(100);	0	0	0	0	0	0	0	0	0	1	0
Otu016118	Bacteria(100);Firmicutes(100);Clostridia(100);Clostridiales(100);Lachnospiraceae(100);possible_genus_Sk018(100);	0	0	0	0	0	0	0	0	0	1	0
Otu016119	Bacteria(100);Firmicutes(100);Clostridia(100);Clostridiales(100);Clostridiaceae_1(100);unclassified(100);	0	0	0	0	0	0	0	0	0	1	0
Otu016120	Bacteria(100);unclassified(100);unclassified(100);unclassified(100);unclassified(100);unclassified(100);	0	0	0	0	0	0	0	0	0	1	0
Otu016121	Bacteria(100);Firmicutes(100);Clostridia(100);Clostridiales(100);Lachnospiraceae(100);unclassified(100);	0	0	0	0	0	0	0	0	0	1	0
Otu016122	Bacteria(100);unclassified(100);unclassified(100);unclassified(100);unclassified(100);unclassified(100);	0	0	0	0	0	0	0	0	0	1	0
Otu016123	Bacteria(100);unclassified(100);unclassified(100);unclassified(100);unclassified(100);unclassified(100);	0	0	0	0	0	0	0	0	0	1	0
Otu016124	Bacteria(100);unclassified(100);unclassified(100);unclassified(100);unclassified(100);unclassified(100);	0	0	0	0	0	0	0	0	0	1	0
Otu016125	Bacteria(100);Firmicutes(100);Clostridia(100);Clostridiales(100);Ruminococcaceae(100);Faecalibacterium(100);	0	0	0	0	0	0	0	0	0	1	0
Otu016126	Bacteria(100);unclassified(100);unclassified(100);unclassified(100);unclassified(100);unclassified(100);	0	0	0	0	0	0	0	0	0	1	0
Otu016127	Bacteria(100);unclassified(100);unclassified(100);unclassified(100);unclassified(100);unclassified(100);	0	0	0	0	0	0	0	0	0	1	0
Otu016128	Bacteria(100);Firmicutes(100);Clostridia(100);Clostridiales(100);Ruminococcaceae(100);Incertae_Sedis(100);	0	0	0	0	0	0	0	0	0	1	0
Otu016129	Bacteria(100);Verrucomicrobia(100);Verrucomicrobiae(100);Verrucomicrobiales(100);Verrucomicrobiaceae(100);Akkermansia(100);	0	0	0	0	0	0	0	0	0	1	0
Otu016130	Bacteria(100);Firmicutes(100);Clostridia(100);Clostridiales(100);Lachnospiraceae(100);unclassified(100);	0	0	0	0	0	0	0	0	0	1	0
Otu016131	Bacteria(100);Firmicutes(100);Clostridia(100);Clostridiales(100);Ruminococcaceae(100);Ruminococcus(100);	0	0	0	0	0	0	0	0	0	1	0
Otu016132	Bacteria(100);Firmicutes(100);Clostridia(100);Clostridiales(100);Lachnospiraceae(100);Roseburia(100);	0	0	0	0	0	0	0	0	0	1	0
Otu016133	Bacteria(100);Firmicutes(100);Clostridia(100);Clostridiales(100);Lachnospiraceae(100);unclassified(100);	0	0	0	0	0	0	0	0	0	1	0
Otu016134	Bacteria(100);unclassified(100);unclassified(100);unclassified(100);unclassified(100);unclassified(100);	0	0	0	0	0	0	0	0	0	1	0
Otu016135	Bacteria(100);Firmicutes(100);Clostridia(100);Clostridiales(100);Lachnospiraceae(100);unclassified(100);	0	0	0	0	0	0	0	0	0	1	0
Otu016136	Bacteria(100);unclassified(100);unclassified(100);unclassified(100);unclassified(100);unclassified(100);	0	0	0	0	0	0	0	0	0	1	0
Otu016137	Bacteria(100);Firmicutes(100);Clostridia(100);Clostridiales(100);Lachnospiraceae(100);unclassified(100);	0	0	0	0	0	0	0	0	0	1	0
Otu016138	Bacteria(100);Firmicutes(100);Clostridia(100);Clostridiales(100);Lachnospiraceae(100);unclassified(100);	0	0	0	0	0	0	0	0	0	1	0
Otu016139	Bacteria(100);unclassified(100);unclassified(100);unclassified(100);unclassified(100);unclassified(100);	0	0	0	0	0	0	0	0	0	1	0
Otu016140	Bacteria(100);Firmicutes(100);Clostridia(100);Clostridiales(100);Lachnospiraceae(100);unclassified(100);	0	0	0	0	0	0	0	0	0	1	0
Otu016141	Bacteria(100);unclassified(100);unclassified(100);unclassified(100);unclassified(100);unclassified(100);	0	0	0	0	0	0	0	0	0	1	0
Otu016142	Bacteria(100);Firmicutes(100);Clostridia(100);Clostridiales(100);Ruminococcaceae(100);unclassified(100);	0	0	0	0	0	0	0	0	0	1	0
Otu016143	Bacteria(100);unclassified(100);unclassified(100);unclassified(100);unclassified(100);unclassified(100);	0	0	0	0	0	0	0	0	0	1	0
Otu016144	Bacteria(100);unclassified(100);unclassified(100);unclassified(100);unclassified(100);unclassified(100);	0	0	0	0	0	0	0	0	0	1	0
Otu016145	Bacteria(100);Firmicutes(100);Clostridia(100);Clostridiales(100);Lachnospiraceae(100);unclassified(100);	0	0	0	0	0	0	0	0	0	1	0
Otu016146	Bacteria(100);Firmicutes(100);Clostridia(100);Clostridiales(100);Ruminococcaceae(100);unclassified(100);	0	0	0	0	0	0	0	0	0	1	0
Otu016147	Bacteria(100);unclassified(100);unclassified(100);unclassified(100);unclassified(100);unclassified(100);	0	0	0	0	0	0	0	0	0	1	0
Otu016148	Bacteria(100);Firmicutes(100);Clostridia(100);Clostridiales(100);Lachnospiraceae(100);unclassified(100);	0	0	0	0	0	0	0	0	0	1	0
Otu016149	Bacteria(100);unclassified(100);unclassified(100);unclassified(100);unclassified(100);unclassified(100);	0	0	0	0	0	0	0	0	0	1	0
Otu016150	Bacteria(100);Firmicutes(100);Clostridia(100);Clostridiales(100);Lachnospiraceae(100);Blautia(100);	0	0	0	0	0	0	0	0	0	1	0
Otu016151	Bacteria(100);Firmicutes(100);Clostridia(100);Clostridiales(100);Lachnospiraceae(100);unclassified(100);	0	0	0	0	0	0	0	0	0	1	0
Otu016152	Bacteria(100);Firmicutes(100);Clostridia(100);Clostridiales(100);Lachnospiraceae(100);Dorea(100);	0	0	0	0	0	0	0	0	0	1	0
Otu016153	Bacteria(100);unclassified(100);unclassified(100);unclassified(100);unclassified(100);unclassified(100);	0	0	0	0	0	0	0	0	0	1	0
Otu016154	Bacteria(100);unclassified(100);unclassified(100);unclassified(100);unclassified(100);unclassified(100);	0	0	0	0	0	0	0	0	0	1	0
Otu016155	Bacteria(100);Firmicutes(100);Clostridia(100);Clostridiales(100);Ruminococcaceae(100);Ruminococcus(100);	0	0	0	0	0	0	0	0	0	1	0
Otu016156	Bacteria(100);unclassified(100);unclassified(100);unclassified(100);unclassified(100);unclassified(100);	0	0	0	0	0	0	0	0	0	1	0
Otu016157	Bacteria(100);Firmicutes(100);unclassified(100);unclassified(100);unclassified(100);unclassified(100);	0	0	0	0	0	0	0	0	0	1	0
Otu016158	Bacteria(100);Firmicutes(100);Negativicutes(100);Selenomonadales(100);Veillonellaceae(100);unclassified(100);	0	0	0	0	0	0	0	0	0	1	0
Otu016159	Bacteria(100);unclassified(100);unclassified(100);unclassified(100);unclassified(100);unclassified(100);	0	0	0	0	0	0	0	0	0	1	0
Otu016160	Bacteria(100);Firmicutes(100);Negativicutes(100);Selenomonadales(100);Veillonellaceae(100);unclassified(100);	0	0	0	0	0	0	0	0	0	1	0
Otu016161	Bacteria(100);Proteobacteria(100);Betaproteobacteria(100);unclassified(100);unclassified(100);unclassified(100);	0	0	0	0	0	0	0	0	0	1	0
Otu016162	Bacteria(100);Firmicutes(100);Clostridia(100);Clostridiales(100);Ruminococcaceae(100);unclassified(100);	0	0	0	0	0	0	0	0	0	1	0
Otu016163	Bacteria(100);Firmicutes(100);Clostridia(100);Clostridiales(100);Ruminococcaceae(100);unclassified(100);	0	0	0	0	0	0	0	0	0	1	0
Otu016164	Bacteria(100);Firmicutes(100);Clostridia(100);Clostridiales(100);Ruminococcaceae(100);unclassified(100);	0	0	0	0	0	0	0	0	0	1	0
Otu016165	Bacteria(100);Firmicutes(100);Clostridia(100);Clostridiales(100);Lachnospiraceae(100);unclassified(100);	0	0	0	0	0	0	0	0	0	1	0
Otu016166	Bacteria(100);Firmicutes(100);Clostridia(100);Clostridiales(100);Lachnospiraceae(100);Roseburia(100);	0	0	0	0	0	0	0	0	0	1	0
Otu016167	Bacteria(100);unclassified(100);unclassified(100);unclassified(100);unclassified(100);unclassified(100);	0	0	0	0	0	0	0	0	0	1	0
Otu016168	Bacteria(100);Bacteroidetes(100);Bacteroidia(100);Bacteroidales(100);Prevotellaceae(100);Alloprevotella(100);	0	0	0	0	0	0	0	0	0	1	0
Otu016169	Bacteria(100);Firmicutes(100);Clostridia(100);Clostridiales(100);Ruminococcaceae(100);unclassified(100);	0	0	0	0	0	0	0	0	0	1	0
Otu016170	Bacteria(100);Firmicutes(100);Clostridia(100);Clostridiales(100);Lachnospiraceae(100);Lachnospira(100);	0	0	0	0	0	0	0	0	0	1	0
Otu016171	Bacteria(100);Firmicutes(100);Clostridia(100);Clostridiales(100);Ruminococcaceae(100);Ruminococcus(100);	0	0	0	0	0	0	0	0	0	1	0
Otu016172	Bacteria(100);unclassified(100);unclassified(100);unclassified(100);unclassified(100);unclassified(100);	0	0	0	0	0	0	0	0	0	1	0
Otu016173	Bacteria(100);Firmicutes(100);Clostridia(100);Clostridiales(100);Lachnospiraceae(100);unclassified(100);	0	0	0	0	0	0	0	0	0	1	0
Otu016174	Bacteria(100);unclassified(100);unclassified(100);unclassified(100);unclassified(100);unclassified(100);	0	0	0	0	0	0	0	0	0	1	0
Otu016175	Bacteria(100);unclassified(100);unclassified(100);unclassified(100);unclassified(100);unclassified(100);	0	0	0	0	0	0	0	0	0	1	0
Otu016176	Bacteria(100);Firmicutes(100);Clostridia(100);Clostridiales(100);unclassified(100);unclassified(100);	0	0	0	0	0	0	0	0	0	1	0
Otu016177	Bacteria(100);Bacteroidetes(100);unclassified(100);unclassified(100);unclassified(100);unclassified(100);	0	0	0	0	0	0	0	0	0	1	0
Otu016178	Bacteria(100);Firmicutes(100);Clostridia(100);Clostridiales(100);Lachnospiraceae(100);unclassified(100);	0	0	0	0	0	0	0	0	0	1	0
Otu016179	Bacteria(100);Firmicutes(100);Clostridia(100);Clostridiales(100);Ruminococcaceae(100);Faecalibacterium(100);	0	0	0	0	0	0	0	0	0	1	0
Otu016180	Bacteria(100);Firmicutes(100);unclassified(100);unclassified(100);unclassified(100);unclassified(100);	0	0	0	0	0	0	0	0	0	1	0
Otu016181	Bacteria(100);Firmicutes(100);Bacilli(100);Lactobacillales(100);unclassified(100);unclassified(100);	0	0	0	0	0	0	0	0	0	1	0
Otu016182	Bacteria(100);unclassified(100);unclassified(100);unclassified(100);unclassified(100);unclassified(100);	0	0	0	0	0	0	0	0	0	1	0
Otu016183	Bacteria(100);Firmicutes(100);Clostridia(100);Clostridiales(100);Lachnospiraceae(100);unclassified(100);	0	0	0	0	0	0	0	0	0	1	0
Otu016184	Bacteria(100);Firmicutes(100);Clostridia(100);Clostridiales(100);Ruminococcaceae(100);unclassified(100);	0	0	0	0	0	0	0	0	0	1	0
Otu016185	Bacteria(100);Firmicutes(100);Clostridia(100);Clostridiales(100);Lachnospiraceae(100);unclassified(100);	0	0	0	0	0	0	0	0	0	1	0
Otu016186	Bacteria(100);Firmicutes(100);Clostridia(100);Clostridiales(100);Ruminococcaceae(100);Pseudoflavonifractor(100);	0	0	0	0	0	0	0	0	0	1	0
Otu016187	Bacteria(100);Firmicutes(100);Clostridia(100);Clostridiales(100);Ruminococcaceae(100);Faecalibacterium(100);	0	0	0	0	0	0	0	0	0	1	0
Otu016188	Bacteria(100);unclassified(100);unclassified(100);unclassified(100);unclassified(100);unclassified(100);	0	0	0	0	0	0	0	0	0	1	0
Otu016189	Bacteria(100);Firmicutes(100);Clostridia(100);Clostridiales(100);Lachnospiraceae(100);unclassified(100);	0	0	0	0	0	0	0	0	0	1	0
Otu016190	Bacteria(100);Firmicutes(100);Clostridia(100);Clostridiales(100);Lachnospiraceae(100);unclassified(100);	0	0	0	0	0	0	0	0	0	1	0
Otu016191	Bacteria(100);unclassified(100);unclassified(100);unclassified(100);unclassified(100);unclassified(100);	0	0	0	0	0	0	0	0	0	1	0
Otu016192	Bacteria(100);unclassified(100);unclassified(100);unclassified(100);unclassified(100);unclassified(100);	0	0	0	0	0	0	0	0	0	1	0
Otu016193	Bacteria(100);Firmicutes(100);Clostridia(100);Clostridiales(100);Ruminococcaceae(100);Faecalibacterium(100);	0	0	0	0	0	0	0	0	0	1	0
Otu016194	Bacteria(100);Firmicutes(100);Clostridia(100);Clostridiales(100);Ruminococcaceae(100);unclassified(100);	0	0	0	0	0	0	0	0	0	1	0
Otu016195	Bacteria(100);Firmicutes(100);Clostridia(100);Clostridiales(100);Ruminococcaceae(100);unclassified(100);	0	0	0	0	0	0	0	0	0	1	0
Otu016196	Bacteria(100);unclassified(100);unclassified(100);unclassified(100);unclassified(100);unclassified(100);	0	0	0	0	0	0	0	0	0	1	0
Otu016197	Bacteria(100);Firmicutes(100);Clostridia(100);Clostridiales(100);Lachnospiraceae(100);Dorea(100);	0	0	0	0	0	0	0	0	0	1	0
Otu016198	Bacteria(100);Bacteroidetes(100);Bacteroidia(100);Bacteroidales(100);Rikenellaceae(100);Alistipes(100);	0	0	0	0	0	0	0	0	0	1	0
Otu016199	Bacteria(100);Firmicutes(100);Erysipelotrichia(100);Erysipelotrichales(100);Erysipelotrichaceae(100);unclassified(100);	0	0	0	0	0	0	0	0	0	1	0
Otu016200	Bacteria(100);unclassified(100);unclassified(100);unclassified(100);unclassified(100);unclassified(100);	0	0	0	0	0	0	0	0	0	1	0
Otu016201	Bacteria(100);Firmicutes(100);Clostridia(100);Clostridiales(100);Lachnospiraceae(100);Lachnospira(100);	0	0	0	0	0	0	0	0	0	1	0
Otu016202	Bacteria(100);unclassified(100);unclassified(100);unclassified(100);unclassified(100);unclassified(100);	0	0	0	0	0	0	0	0	0	1	0
Otu016203	Bacteria(100);Firmicutes(100);Negativicutes(100);Selenomonadales(100);Veillonellaceae(100);Veillonella(100);	0	0	0	0	0	0	0	0	0	1	0
Otu016204	Bacteria(100);Firmicutes(100);Clostridia(100);Clostridiales(100);Lachnospiraceae(100);unclassified(100);	0	0	0	0	0	0	0	0	0	1	0
Otu016205	Bacteria(100);Firmicutes(100);Clostridia(100);Clostridiales(100);unclassified(100);unclassified(100);	0	0	0	0	0	0	0	0	0	1	0
Otu016206	Bacteria(100);Firmicutes(100);Clostridia(100);Clostridiales(100);Ruminococcaceae(100);Subdoligranulum(100);	0	0	0	0	0	0	0	0	0	1	0
Otu016207	Bacteria(100);Proteobacteria(100);Betaproteobacteria(100);unclassified(100);unclassified(100);unclassified(100);	0	0	0	0	0	0	0	0	0	1	0
Otu016208	Bacteria(100);Firmicutes(100);Clostridia(100);Clostridiales(100);Lachnospiraceae(100);unclassified(100);	0	0	0	0	0	0	0	0	0	1	0
Otu016209	Bacteria(100);unclassified(100);unclassified(100);unclassified(100);unclassified(100);unclassified(100);	0	0	0	0	0	0	0	0	0	1	0
Otu016210	Bacteria(100);Firmicutes(100);Clostridia(100);Clostridiales(100);Lachnospiraceae(100);unclassified(100);	0	0	0	0	0	0	0	0	0	1	0
Otu016211	Bacteria(100);Firmicutes(100);Clostridia(100);Clostridiales(100);Lachnospiraceae(100);unclassified(100);	0	0	0	0	0	0	0	0	0	1	0
Otu016212	Bacteria(100);unclassified(100);unclassified(100);unclassified(100);unclassified(100);unclassified(100);	0	0	0	0	0	0	0	0	0	1	0
Otu016213	Bacteria(100);Firmicutes(100);Clostridia(100);Clostridiales(100);Lachnospiraceae(100);unclassified(100);	0	0	0	0	0	0	0	0	0	1	0
Otu016214	Bacteria(100);Bacteroidetes(100);unclassified(100);unclassified(100);unclassified(100);unclassified(100);	0	0	0	0	0	0	0	0	0	1	0
Otu016215	Bacteria(100);Firmicutes(100);Clostridia(100);Clostridiales(100);Lachnospiraceae(100);Incertae_Sedis(100);	0	0	0	0	0	0	0	0	0	1	0
Otu016216	Bacteria(100);unclassified(100);unclassified(100);unclassified(100);unclassified(100);unclassified(100);	0	0	0	0	0	0	0	0	0	1	0
Otu016217	Bacteria(100);unclassified(100);unclassified(100);unclassified(100);unclassified(100);unclassified(100);	0	0	0	0	0	0	0	0	0	1	0
Otu016218	Bacteria(100);Actinobacteria(100);Actinobacteria(100);Micromonosporales(100);Micromonosporaceae(100);unclassified(100);	0	0	0	0	0	0	0	0	0	1	0
Otu016219	Bacteria(100);Firmicutes(100);Erysipelotrichia(100);Erysipelotrichales(100);Erysipelotrichaceae(100);unclassified(100);	0	0	0	0	0	0	0	0	0	1	0
Otu016220	Bacteria(100);Firmicutes(100);Clostridia(100);Clostridiales(100);Ruminococcaceae(100);Ruminococcus(100);	0	0	0	0	0	0	0	0	0	1	0
Otu016221	Bacteria(100);Firmicutes(100);Clostridia(100);Clostridiales(100);Lachnospiraceae(100);unclassified(100);	0	0	0	0	0	0	0	0	0	1	0
Otu016222	Bacteria(100);unclassified(100);unclassified(100);unclassified(100);unclassified(100);unclassified(100);	0	0	0	0	0	0	0	0	0	1	0
Otu016223	Bacteria(100);Firmicutes(100);Clostridia(100);Clostridiales(100);Lachnospiraceae(100);unclassified(100);	0	0	0	0	0	0	0	0	0	1	0
Otu016224	Bacteria(100);unclassified(100);unclassified(100);unclassified(100);unclassified(100);unclassified(100);	0	0	0	0	0	0	0	0	0	1	0
Otu016225	Bacteria(100);unclassified(100);unclassified(100);unclassified(100);unclassified(100);unclassified(100);	0	0	0	0	0	0	0	0	0	1	0
Otu016226	Bacteria(100);unclassified(100);unclassified(100);unclassified(100);unclassified(100);unclassified(100);	0	0	0	0	0	0	0	0	0	1	0
Otu016227	Bacteria(100);unclassified(100);unclassified(100);unclassified(100);unclassified(100);unclassified(100);	0	0	0	0	0	0	0	0	0	1	0
Otu016228	Bacteria(100);Proteobacteria(100);unclassified(100);unclassified(100);unclassified(100);unclassified(100);	0	0	0	0	0	0	0	0	0	1	0
Otu016229	Bacteria(100);unclassified(100);unclassified(100);unclassified(100);unclassified(100);unclassified(100);	0	0	0	0	0	0	0	0	0	1	0
Otu016230	Bacteria(100);Firmicutes(100);Clostridia(100);Clostridiales(100);Lachnospiraceae(100);unclassified(100);	0	0	0	0	0	0	0	0	0	1	0
Otu016231	Bacteria(100);unclassified(100);unclassified(100);unclassified(100);unclassified(100);unclassified(100);	0	0	0	0	0	0	0	0	0	1	0
Otu016232	Bacteria(100);Firmicutes(100);Clostridia(100);Clostridiales(100);Lachnospiraceae(100);Anaerostipes(100);	0	0	0	0	0	0	0	0	0	1	0
Otu016233	Bacteria(100);Firmicutes(100);Clostridia(100);Clostridiales(100);unclassified(100);unclassified(100);	0	0	0	0	0	0	0	0	0	1	0
Otu016234	Bacteria(100);Bacteroidetes(100);unclassified(100);unclassified(100);unclassified(100);unclassified(100);	0	0	0	0	0	0	0	0	0	1	0
Otu016235	Bacteria(100);unclassified(100);unclassified(100);unclassified(100);unclassified(100);unclassified(100);	0	0	0	0	0	0	0	0	0	1	0
Otu016236	Bacteria(100);Firmicutes(100);Clostridia(100);Clostridiales(100);Lachnospiraceae(100);unclassified(100);	0	0	0	0	0	0	0	0	0	1	0
Otu016237	Bacteria(100);Firmicutes(100);Clostridia(100);Clostridiales(100);Ruminococcaceae(100);unclassified(100);	0	0	0	0	0	0	0	0	0	1	0
Otu016238	Bacteria(100);Firmicutes(100);Clostridia(100);Clostridiales(100);Ruminococcaceae(100);unclassified(100);	0	0	0	0	0	0	0	0	0	1	0
Otu016239	Bacteria(100);Firmicutes(100);Clostridia(100);Clostridiales(100);Peptococcaceae(100);Dehalobacterium(100);	0	0	0	0	0	0	0	0	0	1	0
Otu016240	Bacteria(100);unclassified(100);unclassified(100);unclassified(100);unclassified(100);unclassified(100);	0	0	0	0	0	0	0	0	0	1	0
Otu016241	Bacteria(100);Proteobacteria(100);Gammaproteobacteria(100);Enterobacteriales(100);Enterobacteriaceae(100);unclassified(100);	0	0	0	0	0	0	0	0	0	1	0
Otu016242	Bacteria(100);Firmicutes(100);Clostridia(100);Clostridiales(100);Lachnospiraceae(100);unclassified(100);	0	0	0	0	0	0	0	0	0	1	0
Otu016243	Bacteria(100);Firmicutes(100);Clostridia(100);Clostridiales(100);Lachnospiraceae(100);unclassified(100);	0	0	0	0	0	0	0	0	0	1	0
Otu016244	Bacteria(100);Firmicutes(100);Clostridia(100);Clostridiales(100);Lachnospiraceae(100);unclassified(100);	0	0	0	0	0	0	0	0	0	1	0
Otu016245	Bacteria(100);Firmicutes(100);Clostridia(100);Clostridiales(100);Lachnospiraceae(100);unclassified(100);	0	0	0	0	0	0	0	0	0	1	0
Otu016246	Bacteria(100);Firmicutes(100);Clostridia(100);Clostridiales(100);Ruminococcaceae(100);unclassified(100);	0	0	0	0	0	0	0	0	0	1	0
Otu016247	Bacteria(100);Firmicutes(100);Clostridia(100);Clostridiales(100);Lachnospiraceae(100);unclassified(100);	0	0	0	0	0	0	0	0	0	1	0
Otu016248	Bacteria(100);Firmicutes(100);Clostridia(100);Clostridiales(100);Ruminococcaceae(100);Faecalibacterium(100);	0	0	0	0	0	0	0	0	0	1	0
Otu016249	Bacteria(100);Firmicutes(100);Clostridia(100);Clostridiales(100);Lachnospiraceae(100);unclassified(100);	0	0	0	0	0	0	0	0	0	1	0
Otu016250	Bacteria(100);Firmicutes(100);Clostridia(100);Clostridiales(100);Lachnospiraceae(100);unclassified(100);	0	0	0	0	0	0	0	0	0	1	0
Otu016251	Bacteria(100);Firmicutes(100);Clostridia(100);Clostridiales(100);Lachnospiraceae(100);unclassified(100);	0	0	0	0	0	0	0	0	0	1	0
Otu016252	Bacteria(100);unclassified(100);unclassified(100);unclassified(100);unclassified(100);unclassified(100);	0	0	0	0	0	0	0	0	0	1	0
Otu016253	Bacteria(100);Firmicutes(100);Clostridia(100);Clostridiales(100);Lachnospiraceae(100);unclassified(100);	0	0	0	0	0	0	0	0	0	1	0
Otu016254	Bacteria(100);unclassified(100);unclassified(100);unclassified(100);unclassified(100);unclassified(100);	0	0	0	0	0	0	0	0	0	1	0
Otu016255	Bacteria(100);Firmicutes(100);Clostridia(100);Clostridiales(100);Lachnospiraceae(100);unclassified(100);	0	0	0	0	0	0	0	0	0	1	0
Otu016256	Bacteria(100);Firmicutes(100);Clostridia(100);Clostridiales(100);Lachnospiraceae(100);unclassified(100);	0	0	0	0	0	0	0	0	0	1	0
Otu016257	Bacteria(100);Firmicutes(100);Clostridia(100);Clostridiales(100);unclassified(100);unclassified(100);	0	0	0	0	0	0	0	0	0	1	0
Otu016258	Bacteria(100);unclassified(100);unclassified(100);unclassified(100);unclassified(100);unclassified(100);	0	0	0	0	0	0	0	0	0	1	0
Otu016259	Bacteria(100);Firmicutes(100);Clostridia(100);Clostridiales(100);Lachnospiraceae(100);unclassified(100);	0	0	0	0	0	0	0	0	0	1	0
Otu016260	Bacteria(100);unclassified(100);unclassified(100);unclassified(100);unclassified(100);unclassified(100);	0	0	0	0	0	0	0	0	0	1	0
Otu016261	Bacteria(100);Bacteroidetes(100);Bacteroidia(100);Bacteroidales(100);Rikenellaceae(100);Alistipes(100);	0	0	0	0	0	0	0	0	0	1	0
Otu016262	Bacteria(100);Firmicutes(100);Clostridia(100);Clostridiales(100);Lachnospiraceae(100);unclassified(100);	0	0	0	0	0	0	0	0	0	1	0
Otu016263	Bacteria(100);Firmicutes(100);Clostridia(100);Clostridiales(100);Ruminococcaceae(100);unclassified(100);	0	0	0	0	0	0	0	0	0	1	0
Otu016264	Bacteria(100);Firmicutes(100);Clostridia(100);Clostridiales(100);unclassified(100);unclassified(100);	0	0	0	0	0	0	0	0	0	1	0
Otu016265	Bacteria(100);Firmicutes(100);Clostridia(100);Clostridiales(100);Ruminococcaceae(100);Faecalibacterium(100);	0	0	0	0	0	0	0	0	0	1	0
Otu016266	Bacteria(100);Firmicutes(100);Clostridia(100);Clostridiales(100);Ruminococcaceae(100);Faecalibacterium(100);	0	0	0	0	0	0	0	0	0	1	0
Otu016267	Bacteria(100);Firmicutes(100);Clostridia(100);Clostridiales(100);Lachnospiraceae(100);unclassified(100);	0	0	0	0	0	0	0	0	0	1	0
Otu016268	Bacteria(100);Firmicutes(100);Clostridia(100);Clostridiales(100);Lachnospiraceae(100);unclassified(100);	0	0	0	0	0	0	0	0	0	1	0
Otu016269	Bacteria(100);Firmicutes(100);Clostridia(100);Clostridiales(100);Lachnospiraceae(100);unclassified(100);	0	0	0	0	0	0	0	0	0	1	0
Otu016270	Bacteria(100);Firmicutes(100);Clostridia(100);Clostridiales(100);Lachnospiraceae(100);unclassified(100);	0	0	0	0	0	0	0	0	0	1	0
Otu016271	Bacteria(100);Firmicutes(100);Clostridia(100);Clostridiales(100);Lachnospiraceae(100);unclassified(100);	0	0	0	0	0	0	0	0	0	1	0
Otu016272	Bacteria(100);Firmicutes(100);unclassified(100);unclassified(100);unclassified(100);unclassified(100);	0	0	0	0	0	0	0	0	0	1	0
Otu016273	Bacteria(100);Firmicutes(100);Clostridia(100);Clostridiales(100);Lachnospiraceae(100);unclassified(100);	0	0	0	0	0	0	0	0	0	1	0
Otu016274	Bacteria(100);unclassified(100);unclassified(100);unclassified(100);unclassified(100);unclassified(100);	0	0	0	0	0	0	0	0	0	1	0
Otu016275	Bacteria(100);Firmicutes(100);Negativicutes(100);Selenomonadales(100);Veillonellaceae(100);Negativicoccus(100);	0	0	0	0	0	0	0	0	0	1	0
Otu016276	Bacteria(100);Firmicutes(100);Clostridia(100);Clostridiales(100);Peptostreptococcaceae(100);unclassified(100);	0	0	0	0	0	0	0	0	0	1	0
Otu016277	Bacteria(100);unclassified(100);unclassified(100);unclassified(100);unclassified(100);unclassified(100);	0	0	0	0	0	0	0	0	0	1	0
Otu016278	Bacteria(100);Firmicutes(100);Clostridia(100);unclassified(100);unclassified(100);unclassified(100);	0	0	0	0	0	0	0	0	0	1	0
Otu016279	Bacteria(100);unclassified(100);unclassified(100);unclassified(100);unclassified(100);unclassified(100);	0	0	0	0	0	0	0	0	0	1	0
Otu016280	Bacteria(100);Firmicutes(100);unclassified(100);unclassified(100);unclassified(100);unclassified(100);	0	0	0	0	0	0	0	0	0	1	0
Otu016281	Bacteria(100);Firmicutes(100);Clostridia(100);Clostridiales(100);Lachnospiraceae(100);Lachnospira(100);	0	0	0	0	0	0	0	0	0	1	0
Otu016282	Bacteria(100);unclassified(100);unclassified(100);unclassified(100);unclassified(100);unclassified(100);	0	0	0	0	0	0	0	0	0	1	0
Otu016283	Bacteria(100);unclassified(100);unclassified(100);unclassified(100);unclassified(100);unclassified(100);	0	0	0	0	0	0	0	0	0	1	0
Otu016284	Bacteria(100);Firmicutes(100);Clostridia(100);Clostridiales(100);Lachnospiraceae(100);unclassified(100);	0	0	0	0	0	0	0	0	0	1	0
Otu016285	Bacteria(100);unclassified(100);unclassified(100);unclassified(100);unclassified(100);unclassified(100);	0	0	0	0	0	0	0	0	0	1	0
Otu016286	Bacteria(100);Firmicutes(100);unclassified(100);unclassified(100);unclassified(100);unclassified(100);	0	0	0	0	0	0	0	0	0	1	0
Otu016287	Bacteria(100);unclassified(100);unclassified(100);unclassified(100);unclassified(100);unclassified(100);	0	0	0	0	0	0	0	0	0	1	0
Otu016288	Bacteria(100);Firmicutes(100);Erysipelotrichia(100);Erysipelotrichales(100);Erysipelotrichaceae(100);unclassified(100);	0	0	0	0	0	0	0	0	0	1	0
Otu016289	Bacteria(100);unclassified(100);unclassified(100);unclassified(100);unclassified(100);unclassified(100);	0	0	0	0	0	0	0	0	0	1	0
Otu016290	Bacteria(100);unclassified(100);unclassified(100);unclassified(100);unclassified(100);unclassified(100);	0	0	0	0	0	0	0	0	0	1	0
Otu016291	Bacteria(100);unclassified(100);unclassified(100);unclassified(100);unclassified(100);unclassified(100);	0	0	0	0	0	0	0	0	0	1	0
Otu016292	Bacteria(100);Firmicutes(100);Clostridia(100);Clostridiales(100);Lachnospiraceae(100);unclassified(100);	0	0	0	0	0	0	0	0	0	1	0
Otu016293	Bacteria(100);Firmicutes(100);Clostridia(100);Clostridiales(100);Lachnospiraceae(100);unclassified(100);	0	0	0	0	0	0	0	0	0	1	0
Otu016294	Bacteria(100);Firmicutes(100);Clostridia(100);Clostridiales(100);Lachnospiraceae(100);unclassified(100);	0	0	0	0	0	0	0	0	0	1	0
Otu016295	Bacteria(100);Firmicutes(100);Clostridia(100);Clostridiales(100);Lachnospiraceae(100);unclassified(100);	0	0	0	0	0	0	0	0	0	1	0
Otu016296	Bacteria(100);Firmicutes(100);Clostridia(100);Clostridiales(100);Lachnospiraceae(100);unclassified(100);	0	0	0	0	0	0	0	0	0	1	0
Otu016297	Bacteria(100);Firmicutes(100);Clostridia(100);Clostridiales(100);Lachnospiraceae(100);unclassified(100);	0	0	0	0	0	0	0	0	0	1	0
Otu016298	Bacteria(100);unclassified(100);unclassified(100);unclassified(100);unclassified(100);unclassified(100);	0	0	0	0	0	0	0	0	0	1	0
Otu016299	Bacteria(100);unclassified(100);unclassified(100);unclassified(100);unclassified(100);unclassified(100);	0	0	0	0	0	0	0	0	0	1	0
Otu016300	Bacteria(100);unclassified(100);unclassified(100);unclassified(100);unclassified(100);unclassified(100);	0	0	0	0	0	0	0	0	0	1	0
Otu016301	Bacteria(100);unclassified(100);unclassified(100);unclassified(100);unclassified(100);unclassified(100);	0	0	0	0	0	0	0	0	0	1	0
Otu016302	Bacteria(100);unclassified(100);unclassified(100);unclassified(100);unclassified(100);unclassified(100);	0	0	0	0	0	0	0	0	0	1	0
Otu016303	Bacteria(100);Firmicutes(100);Clostridia(100);Clostridiales(100);Lachnospiraceae(100);unclassified(100);	0	0	0	0	0	0	0	0	0	1	0
Otu016304	Bacteria(100);unclassified(100);unclassified(100);unclassified(100);unclassified(100);unclassified(100);	0	0	0	0	0	0	0	0	0	1	0
Otu016305	Bacteria(100);unclassified(100);unclassified(100);unclassified(100);unclassified(100);unclassified(100);	0	0	0	0	0	0	0	0	0	1	0
Otu016306	Bacteria(100);Firmicutes(100);Clostridia(100);Clostridiales(100);Lachnospiraceae(100);unclassified(100);	0	0	0	0	0	0	0	0	0	1	0
Otu016307	Bacteria(100);unclassified(100);unclassified(100);unclassified(100);unclassified(100);unclassified(100);	0	0	0	0	0	0	0	0	0	1	0
Otu016308	Bacteria(100);Firmicutes(100);Clostridia(100);Clostridiales(100);Lachnospiraceae(100);unclassified(100);	0	0	0	0	0	0	0	0	0	1	0
Otu016309	Bacteria(100);Firmicutes(100);Clostridia(100);Clostridiales(100);Lachnospiraceae(100);unclassified(100);	0	0	0	0	0	0	0	0	0	1	0
Otu016310	Bacteria(100);Firmicutes(100);Clostridia(100);Clostridiales(100);Lachnospiraceae(100);unclassified(100);	0	0	0	0	0	0	0	0	0	1	0
Otu016311	Bacteria(100);unclassified(100);unclassified(100);unclassified(100);unclassified(100);unclassified(100);	0	0	0	0	0	0	0	0	0	1	0
Otu016312	Bacteria(100);Firmicutes(100);Clostridia(100);Clostridiales(100);Lachnospiraceae(100);unclassified(100);	0	0	0	0	0	0	0	0	0	1	0
Otu016313	Bacteria(100);unclassified(100);unclassified(100);unclassified(100);unclassified(100);unclassified(100);	0	0	0	0	0	0	0	0	0	1	0
Otu016314	Bacteria(100);unclassified(100);unclassified(100);unclassified(100);unclassified(100);unclassified(100);	0	0	0	0	0	0	0	0	0	1	0
Otu016315	Bacteria(100);Tenericutes(100);Mollicutes(100);RF9(100);unclassified(100);unclassified(100);	0	0	0	0	0	0	0	0	0	1	0
Otu016316	Bacteria(100);Firmicutes(100);Clostridia(100);Clostridiales(100);Lachnospiraceae(100);unclassified(100);	0	0	0	0	0	0	0	0	0	1	0
Otu016317	Bacteria(100);Firmicutes(100);unclassified(100);unclassified(100);unclassified(100);unclassified(100);	0	0	0	0	0	0	0	0	0	1	0
Otu016318	Bacteria(100);Firmicutes(100);Clostridia(100);Clostridiales(100);Lachnospiraceae(100);unclassified(100);	0	0	0	0	0	0	0	0	0	1	0
Otu016319	Bacteria(100);Firmicutes(100);Clostridia(100);Clostridiales(100);Lachnospiraceae(100);Anaerostipes(100);	0	0	0	0	0	0	0	0	0	1	0
Otu016320	Bacteria(100);Firmicutes(100);Erysipelotrichia(100);Erysipelotrichales(100);Erysipelotrichaceae(100);unclassified(100);	0	0	0	0	0	0	0	0	0	1	0
Otu016321	Bacteria(100);unclassified(100);unclassified(100);unclassified(100);unclassified(100);unclassified(100);	0	0	0	0	0	0	0	0	0	1	0
Otu016322	Bacteria(100);unclassified(100);unclassified(100);unclassified(100);unclassified(100);unclassified(100);	0	0	0	0	0	0	0	0	1	0	0
Otu016323	Bacteria(100);Firmicutes(100);Clostridia(100);Clostridiales(100);Lachnospiraceae(100);unclassified(100);	0	0	0	0	0	0	0	0	1	0	0
Otu016325	Bacteria(100);unclassified(100);unclassified(100);unclassified(100);unclassified(100);unclassified(100);	0	0	0	0	0	0	0	0	1	0	0
Otu016329	Bacteria(100);Bacteroidetes(100);unclassified(100);unclassified(100);unclassified(100);unclassified(100);	0	0	0	0	0	0	0	0	1	0	0
Otu016335	Bacteria(100);Bacteroidetes(100);Bacteroidia(100);Bacteroidales(100);Rikenellaceae(100);RC9_gut_group(100);	0	0	0	0	0	0	0	0	1	0	0
Otu016336	Bacteria(100);unclassified(100);unclassified(100);unclassified(100);unclassified(100);unclassified(100);	0	0	0	0	0	0	0	0	1	0	0
Otu016337	Bacteria(100);Actinobacteria(100);Coriobacteriia(100);Coriobacteriales(100);Coriobacteriaceae(100);Parvibacter(100);	0	0	0	0	0	0	0	0	1	0	0
Otu016338	Bacteria(100);Bacteroidetes(100);Bacteroidia(100);Bacteroidales(100);unclassified(100);unclassified(100);	0	0	0	0	0	0	0	0	1	0	0
Otu016340	Bacteria(100);Bacteroidetes(100);Bacteroidia(100);Bacteroidales(100);unclassified(100);unclassified(100);	0	0	0	0	0	0	0	0	1	0	0
Otu016342	Bacteria(100);Bacteroidetes(100);unclassified(100);unclassified(100);unclassified(100);unclassified(100);	0	0	0	0	0	0	0	0	1	0	0
Otu016348	Bacteria(100);Bacteroidetes(100);Bacteroidia(100);Bacteroidales(100);Porphyromonadaceae(100);Parabacteroides(100);	0	0	0	0	0	0	0	0	1	0	0
Otu016350	Bacteria(100);Firmicutes(100);Negativicutes(100);Selenomonadales(100);Veillonellaceae(100);unclassified(100);	0	0	0	0	0	0	0	0	1	0	0
Otu016352	Bacteria(100);Bacteroidetes(100);Bacteroidia(100);Bacteroidales(100);Prevotellaceae(100);Prevotella(100);	0	0	0	0	0	0	0	0	1	0	0
Otu016353	Bacteria(100);Bacteroidetes(100);Bacteroidia(100);Bacteroidales(100);Bacteroidaceae(100);Bacteroides(100);	0	0	0	0	0	0	0	0	1	0	0
Otu016354	Bacteria(100);Bacteroidetes(100);Bacteroidia(100);Bacteroidales(100);Prevotellaceae(100);Prevotella(100);	0	0	0	0	0	0	0	0	1	0	0
Otu016357	Bacteria(100);Firmicutes(100);Clostridia(100);Clostridiales(100);Lachnospiraceae(100);unclassified(100);	0	0	0	0	0	0	0	0	1	0	0
Otu016360	Bacteria(100);unclassified(100);unclassified(100);unclassified(100);unclassified(100);unclassified(100);	0	0	0	0	0	0	0	0	1	0	0
Otu016361	Bacteria(100);Firmicutes(100);Clostridia(100);Clostridiales(100);Lachnospiraceae(100);unclassified(100);	0	0	0	0	0	0	0	0	1	0	0
Otu016364	Bacteria(100);Firmicutes(100);Clostridia(100);Clostridiales(100);Christensenellaceae(100);unclassified(100);	0	0	0	0	0	0	0	0	1	0	0
Otu016365	Bacteria(100);Bacteroidetes(100);Bacteroidia(100);Bacteroidales(100);unclassified(100);unclassified(100);	0	0	0	0	0	0	0	0	1	0	0
Otu016366	Bacteria(100);Bacteroidetes(100);Bacteroidia(100);Bacteroidales(100);Porphyromonadaceae(100);unclassified(100);	0	0	0	0	0	0	0	0	1	0	0
Otu016370	Bacteria(100);Proteobacteria(100);Betaproteobacteria(100);Burkholderiales(100);Alcaligenaceae(100);Parasutterella(100);	0	0	0	0	0	0	0	0	1	0	0
Otu016372	Bacteria(100);Bacteroidetes(100);Bacteroidia(100);Bacteroidales(100);unclassified(100);unclassified(100);	0	0	0	0	0	0	0	0	1	0	0
Otu016377	Bacteria(100);Firmicutes(100);Negativicutes(100);Selenomonadales(100);Veillonellaceae(100);Dialister(100);	0	0	0	0	0	0	0	0	1	0	0
Otu016378	Bacteria(100);Bacteroidetes(100);Bacteroidia(100);Bacteroidales(100);Porphyromonadaceae(100);Barnesiella(100);	0	0	0	0	0	0	0	0	1	0	0
Otu016379	Bacteria(100);unclassified(100);unclassified(100);unclassified(100);unclassified(100);unclassified(100);	0	0	0	0	0	0	0	0	1	0	0
Otu016382	Bacteria(100);unclassified(100);unclassified(100);unclassified(100);unclassified(100);unclassified(100);	0	0	0	0	0	0	0	0	1	0	0
Otu016385	Bacteria(100);Bacteroidetes(100);Bacteroidia(100);Bacteroidales(100);Porphyromonadaceae(100);unclassified(100);	0	0	0	0	0	0	0	0	1	0	0
Otu016386	Bacteria(100);unclassified(100);unclassified(100);unclassified(100);unclassified(100);unclassified(100);	0	0	0	0	0	0	0	0	1	0	0
Otu016389	Bacteria(100);Firmicutes(100);Clostridia(100);Clostridiales(100);Lachnospiraceae(100);unclassified(100);	0	0	0	0	0	0	0	0	1	0	0
Otu016391	Bacteria(100);Firmicutes(100);Clostridia(100);Clostridiales(100);Lachnospiraceae(100);possible_genus_Sk018(100);	0	0	0	0	0	0	0	0	1	0	0
Otu016402	Bacteria(100);Firmicutes(100);Clostridia(100);unclassified(100);unclassified(100);unclassified(100);	0	0	0	0	0	0	0	0	1	0	0
Otu016404	Bacteria(100);unclassified(100);unclassified(100);unclassified(100);unclassified(100);unclassified(100);	0	0	0	0	0	0	0	0	1	0	0
Otu016410	Bacteria(100);Bacteroidetes(100);unclassified(100);unclassified(100);unclassified(100);unclassified(100);	0	0	0	0	0	0	0	0	1	0	0
Otu016424	Bacteria(100);unclassified(100);unclassified(100);unclassified(100);unclassified(100);unclassified(100);	0	0	0	0	0	0	0	0	0	1	0
Otu016425	Bacteria(100);Firmicutes(100);Clostridia(100);Clostridiales(100);Lachnospiraceae(100);unclassified(100);	0	0	0	0	0	0	0	0	0	1	0
Otu016426	Bacteria(100);Firmicutes(100);Clostridia(100);Clostridiales(100);Lachnospiraceae(100);unclassified(100);	0	0	0	0	0	0	0	0	0	1	0
Otu016427	Bacteria(100);Firmicutes(100);Clostridia(100);Clostridiales(100);Ruminococcaceae(100);Ruminococcus(100);	0	0	0	0	0	0	0	0	0	1	0
Otu016428	Bacteria(100);Actinobacteria(100);Coriobacteriia(100);Coriobacteriales(100);Coriobacteriaceae(100);unclassified(100);	0	0	0	0	0	0	0	0	0	1	0
Otu016429	Bacteria(100);unclassified(100);unclassified(100);unclassified(100);unclassified(100);unclassified(100);	0	0	0	0	0	0	0	0	0	1	0
Otu016430	Bacteria(100);Firmicutes(100);Clostridia(100);Clostridiales(100);Lachnospiraceae(100);Anaerostipes(100);	0	0	0	0	0	0	0	0	0	1	0
Otu016431	Bacteria(100);Firmicutes(100);Erysipelotrichia(100);Erysipelotrichales(100);Erysipelotrichaceae(100);Incertae_Sedis(100);	0	0	0	0	0	0	0	0	0	1	0
Otu016432	Bacteria(100);Firmicutes(100);Clostridia(100);Clostridiales(100);Ruminococcaceae(100);Sporobacter(100);	0	0	0	0	0	0	0	0	0	1	0
Otu016433	Bacteria(100);Firmicutes(100);Clostridia(100);Clostridiales(100);Ruminococcaceae(100);unclassified(100);	0	0	0	0	0	0	0	0	0	1	0
Otu016434	Bacteria(100);unclassified(100);unclassified(100);unclassified(100);unclassified(100);unclassified(100);	0	0	0	0	0	0	0	0	0	1	0
Otu016435	Bacteria(100);Firmicutes(100);Erysipelotrichia(100);Erysipelotrichales(100);Erysipelotrichaceae(100);unclassified(100);	0	0	0	0	0	0	0	0	0	1	0
Otu016436	Bacteria(100);Proteobacteria(100);unclassified(100);unclassified(100);unclassified(100);unclassified(100);	0	0	0	0	0	0	0	0	0	1	0
Otu016437	Bacteria(100);Firmicutes(100);Clostridia(100);Clostridiales(100);Ruminococcaceae(100);Incertae_Sedis(100);	0	0	0	0	0	0	0	0	0	1	0
Otu016438	Bacteria(100);Firmicutes(100);Clostridia(100);Clostridiales(100);Lachnospiraceae(100);Lachnospira(100);	0	0	0	0	0	0	0	0	0	1	0
Otu016439	Bacteria(100);Bacteroidetes(100);unclassified(100);unclassified(100);unclassified(100);unclassified(100);	0	0	0	0	0	0	0	0	0	1	0
Otu016440	Bacteria(100);unclassified(100);unclassified(100);unclassified(100);unclassified(100);unclassified(100);	0	0	0	0	0	0	0	0	0	1	0
Otu016441	Bacteria(100);Firmicutes(100);Clostridia(100);Clostridiales(100);Peptostreptococcaceae(100);unclassified(100);	0	0	0	0	0	0	0	0	0	1	0
Otu016442	Bacteria(100);Firmicutes(100);Clostridia(100);Clostridiales(100);unclassified(100);unclassified(100);	0	0	0	0	0	0	0	0	0	1	0
Otu016443	Bacteria(100);Firmicutes(100);Erysipelotrichia(100);Erysipelotrichales(100);Erysipelotrichaceae(100);unclassified(100);	0	0	0	0	0	0	0	0	0	1	0
Otu016444	Bacteria(100);unclassified(100);unclassified(100);unclassified(100);unclassified(100);unclassified(100);	0	0	0	0	0	0	0	0	0	1	0
Otu016445	Bacteria(100);Firmicutes(100);Clostridia(100);Clostridiales(100);Ruminococcaceae(100);unclassified(100);	0	0	0	0	0	0	0	0	0	1	0
Otu016446	Bacteria(100);Firmicutes(100);Erysipelotrichia(100);Erysipelotrichales(100);Erysipelotrichaceae(100);unclassified(100);	0	0	0	0	0	0	0	0	0	1	0
Otu016447	Bacteria(100);Firmicutes(100);Clostridia(100);Clostridiales(100);Ruminococcaceae(100);Ruminococcus(100);	0	0	0	0	0	0	0	0	0	1	0
Otu016448	Bacteria(100);Firmicutes(100);Negativicutes(100);Selenomonadales(100);Veillonellaceae(100);unclassified(100);	0	0	0	0	0	0	0	0	0	1	0
Otu016449	Bacteria(100);unclassified(100);unclassified(100);unclassified(100);unclassified(100);unclassified(100);	0	0	0	0	0	0	0	0	0	1	0
Otu016450	Bacteria(100);unclassified(100);unclassified(100);unclassified(100);unclassified(100);unclassified(100);	0	0	0	0	0	0	0	0	0	1	0
Otu016451	Bacteria(100);Firmicutes(100);Negativicutes(100);Selenomonadales(100);Veillonellaceae(100);unclassified(100);	0	0	0	0	0	0	0	0	0	1	0
Otu016452	Bacteria(100);Firmicutes(100);Clostridia(100);Clostridiales(100);Ruminococcaceae(100);Ruminococcus(100);	0	0	0	0	0	0	0	0	0	1	0
Otu016453	Bacteria(100);Firmicutes(100);Negativicutes(100);Selenomonadales(100);Veillonellaceae(100);unclassified(100);	0	0	0	0	0	0	0	0	0	1	0
Otu016454	Bacteria(100);unclassified(100);unclassified(100);unclassified(100);unclassified(100);unclassified(100);	0	0	0	0	0	0	0	0	0	1	0
Otu016455	Bacteria(100);Firmicutes(100);Erysipelotrichia(100);Erysipelotrichales(100);Erysipelotrichaceae(100);unclassified(100);	0	0	0	0	0	0	0	0	0	1	0
Otu016456	Bacteria(100);Firmicutes(100);Clostridia(100);Clostridiales(100);Lachnospiraceae(100);unclassified(100);	0	0	0	0	0	0	0	0	0	1	0
Otu016457	Bacteria(100);Bacteroidetes(100);Bacteroidia(100);Bacteroidales(100);Rikenellaceae(100);Alistipes(100);	0	0	0	0	0	0	0	0	0	1	0
Otu016458	Bacteria(100);Firmicutes(100);Negativicutes(100);Selenomonadales(100);Veillonellaceae(100);unclassified(100);	0	0	0	0	0	0	0	0	0	1	0
Otu016459	Bacteria(100);unclassified(100);unclassified(100);unclassified(100);unclassified(100);unclassified(100);	0	0	0	0	0	0	0	0	0	1	0
Otu016460	Bacteria(100);Firmicutes(100);Negativicutes(100);Selenomonadales(100);Veillonellaceae(100);unclassified(100);	0	0	0	0	0	0	0	0	0	1	0
Otu016461	Bacteria(100);Firmicutes(100);Clostridia(100);Clostridiales(100);Ruminococcaceae(100);unclassified(100);	0	0	0	0	0	0	0	0	0	1	0
Otu016462	Bacteria(100);Firmicutes(100);Erysipelotrichia(100);Erysipelotrichales(100);Erysipelotrichaceae(100);unclassified(100);	0	0	0	0	0	0	0	0	0	1	0
Otu016463	Bacteria(100);Firmicutes(100);Clostridia(100);Clostridiales(100);Lachnospiraceae(100);Roseburia(100);	0	0	0	0	0	0	0	0	0	1	0
Otu016464	Bacteria(100);Firmicutes(100);Clostridia(100);Clostridiales(100);Peptostreptococcaceae(100);unclassified(100);	0	0	0	0	0	0	0	0	0	1	0
Otu016465	Bacteria(100);Firmicutes(100);Clostridia(100);Clostridiales(100);Lachnospiraceae(100);unclassified(100);	0	0	0	0	0	0	0	0	0	1	0
Otu016466	Bacteria(100);Firmicutes(100);Clostridia(100);Clostridiales(100);Ruminococcaceae(100);unclassified(100);	0	0	0	0	0	0	0	0	0	1	0
Otu016467	Bacteria(100);Firmicutes(100);Erysipelotrichia(100);Erysipelotrichales(100);Erysipelotrichaceae(100);unclassified(100);	0	0	0	0	0	0	0	0	0	1	0
Otu016468	Bacteria(100);Firmicutes(100);Negativicutes(100);Selenomonadales(100);Veillonellaceae(100);unclassified(100);	0	0	0	0	0	0	0	0	0	1	0
Otu016469	Bacteria(100);Firmicutes(100);Clostridia(100);Clostridiales(100);Lachnospiraceae(100);possible_genus_Sk018(100);	0	0	0	0	0	0	0	0	0	1	0
Otu016470	Bacteria(100);Firmicutes(100);Clostridia(100);Clostridiales(100);unclassified(100);unclassified(100);	0	0	0	0	0	0	0	0	0	1	0
Otu016471	Bacteria(100);unclassified(100);unclassified(100);unclassified(100);unclassified(100);unclassified(100);	0	0	0	0	0	0	0	0	0	1	0
Otu016472	Bacteria(100);Firmicutes(100);Clostridia(100);Clostridiales(100);unclassified(100);unclassified(100);	0	0	0	0	0	0	0	0	0	1	0
Otu016473	Bacteria(100);Firmicutes(100);Clostridia(100);Clostridiales(100);Lachnospiraceae(100);Blautia(100);	0	0	0	0	0	0	0	0	0	1	0
Otu016474	Bacteria(100);unclassified(100);unclassified(100);unclassified(100);unclassified(100);unclassified(100);	0	0	0	0	0	0	0	0	0	1	0
Otu016475	Bacteria(100);Firmicutes(100);Clostridia(100);Clostridiales(100);Lachnospiraceae(100);unclassified(100);	0	0	0	0	0	0	0	0	0	1	0
Otu016476	Bacteria(100);Firmicutes(100);Clostridia(100);Clostridiales(100);Lachnospiraceae(100);unclassified(100);	0	0	0	0	0	0	0	0	0	1	0
Otu016477	Bacteria(100);Firmicutes(100);Clostridia(100);Clostridiales(100);Lachnospiraceae(100);unclassified(100);	0	0	0	0	0	0	0	0	0	1	0
Otu016478	Bacteria(100);Firmicutes(100);Clostridia(100);Clostridiales(100);Lachnospiraceae(100);unclassified(100);	0	0	0	0	0	0	0	0	0	1	0
Otu016479	Bacteria(100);Firmicutes(100);Clostridia(100);Clostridiales(100);Lachnospiraceae(100);unclassified(100);	0	0	0	0	0	0	0	0	0	1	0
Otu016480	Bacteria(100);Firmicutes(100);Erysipelotrichia(100);Erysipelotrichales(100);Erysipelotrichaceae(100);unclassified(100);	0	0	0	0	0	0	0	0	0	1	0
Otu016481	Bacteria(100);unclassified(100);unclassified(100);unclassified(100);unclassified(100);unclassified(100);	0	0	0	0	0	0	0	0	0	1	0
Otu016482	Bacteria(100);Firmicutes(100);Bacilli(100);Lactobacillales(100);Streptococcaceae(100);Lactococcus(100);	0	0	0	0	0	0	0	0	0	1	0
[truncated: 962 more rows]
