# Supplementary material for: Levan Enhances Associated Growth of Bacteroides, Escherichia, Streptococcus and Faecalibacterium in Fecal Microbiota
Source: PLoS One. 2015 Dec 2;10(12):e0144042. doi: 10.1371/journal.pone.0144042 (PMC4667893; doi:10.1371/journal.pone.0144042)
Supplement: S2 Table — (XLSX) [file pone.0144042.s002.xlsx]

## Sheet: Sheet1
Time, h	Exp1_FS1_Par1_Without levan	Exp1_FS1_Par2_Without levan	Exp1_FS2_Par1_Without levan	Exp1_FS2_Par2_Without levan	Exp1_FS3_Par1_Without levan	Exp1_FS3_Par2_Without levan	Exp1_FS4_Par1_Without levan	Exp1_FS4_Par2_Without levan	Exp1_FS5_Par1_Without levan	Exp1_FS5_Par2_Without levan	Exp1_FS1_Par1_Levan+AA	Exp1_FS1_Par2_Levan+AA	Exp1_FS2_Par1_Levan+AA	Exp1_FS2_Par2_Levan+AA	Exp1_FS3_Par1_Levan+AA	Exp1_FS3_Par2_Levan+AA	Exp1_FS4_Par1_Levan+AA	Exp1_FS4_Par2_Levan+AA	Exp1_FS5_Par1_Levan+AA	Exp1_FS5_Par2_Levan+AA	Exp2_FS1_Par1_Without levan	Exp2_FS1_Par2_Without levan	Exp2_FS2_Par1_Without levan	Exp2_FS2_Par2_Without levan	Exp2_FS3_Par1_Without levan	Exp2_FS3_Par2_Without levan	Exp2_FS4_Par1_Without levan	Exp2_FS4_Par2_Without levan	Exp2_FS5_Par1_Without levan	Exp2_FS5_Par2_Without levan	Exp2_FS1_Par1_Levan+AA	Exp2_FS1_Par2_Levan+AA	Exp2_FS2_Par1_Levan+AA	Exp2_FS2_Par2_Levan+AA	Exp2_FS3_Par1_Levan+AA	Exp2_FS3_Par2_Levan+AA	Exp2_FS4_Par1_Levan+AA	Exp2_FS4_Par2_Levan+AA	Exp2_FS5_Par1_Levan+AA	Exp2_FS5_Par2_Levan+AA	Exp3_FS1_Par1_Without levan	Exp3_FS1_Par2_Without levan	Exp3_FS2_Par1_Without levan	Exp3_FS2_Par2_Without levan	Exp3_FS3_Par1_Without levan	Exp3_FS3_Par2_Without levan	Exp3_FS4_Par1_Without levan	Exp3_FS4_Par2_Without levan	Exp3_FS5_Par1_Without levan
0	8.85128e-05	8.48547e-05	1.14108e-07	6.51645e-06	7.29463e-06	3.50664e-06	8.58706e-05	8.39576e-05	1.5678e-06	8.31225e-06	-7.28326e-06	-1.07596e-05	-5.59308e-06	-7.67436e-06	-4.25405e-06	-5.20042e-05	-4.06921e-06	-0.000222389	-1.98725e-05	-2.44225e-05	9.8024e-05	9.86814e-05	1.00673e-05	8.05856e-06	1.86167e-05	1.45219e-05	5.87964e-05	5.77139e-05	2.62607e-05	2.1844e-05	8.27381e-07	-1.83529e-06	-6.46738e-06	-7.86513e-06	-8.16121e-06	-6.43604e-06	-3.85577e-06	-3.13731e-06	-6.09543e-06	-3.41879e-06	5.64965e-05	4.9721e-05	-5.52709e-05	-3.93388e-05	-9.66402e-06	-0.00010539	-0.000608987	-8.95545e-07	-9.56719e-06
0.5	8.3226e-05	8.02523e-05	3.42558e-06	6.56783e-06	8.0966e-06	4.47906e-06	7.82037e-05	7.61847e-05	7.36972e-06	1.11512e-05	4.73564e-06	1.99254e-06	-5.49362e-06	-7.45123e-06	-3.89283e-06	-3.4527e-05	-1.96887e-07	-0.000210566	-1.11251e-05	-1.11582e-05	9.82427e-05	9.85666e-05	1.10471e-05	9.01048e-06	1.77359e-05	1.39127e-05	5.52899e-05	5.48689e-05	2.44695e-05	2.08745e-05	3.51549e-07	-2.02113e-06	-4.74636e-06	-5.73901e-06	-6.07257e-06	-4.90831e-06	-1.80172e-06	-1.19202e-06	-4.48768e-06	-2.2511e-06	6.22671e-05	5.39705e-05	-4.87496e-05	-2.82351e-05	-4.66479e-06	-8.42155e-05	-0.000407915	5.79932e-06	-4.70086e-06
1	7.7478e-05	7.49634e-05	6.57377e-06	7.58241e-06	8.70379e-06	5.24714e-06	7.29187e-05	7.08575e-05	1.19936e-05	1.41212e-05	1.263e-05	1.04304e-05	-4.80518e-06	-6.62953e-06	-3.11981e-06	-2.18493e-05	2.20547e-06	-0.000187786	-4.90199e-06	-2.01812e-06	9.64799e-05	9.66457e-05	1.22656e-05	1.02458e-05	1.69115e-05	1.33502e-05	5.25914e-05	5.26333e-05	2.46353e-05	2.16621e-05	1.89218e-06	-3.74413e-08	-3.62879e-06	-4.34407e-06	-4.49063e-06	-3.70313e-06	-4.3121e-07	7.56074e-08	-2.86252e-06	-9.22819e-07	6.64216e-05	5.7193e-05	-4.24853e-05	-1.95171e-05	-1.40733e-06	-6.93105e-05	-0.000253508	9.61745e-06	-4.67713e-07
1.5	7.14944e-05	6.92561e-05	9.85024e-06	9.63517e-06	9.26933e-06	5.9542e-06	6.95676e-05	6.75148e-05	1.55898e-05	1.70745e-05	1.71352e-05	1.53252e-05	-3.39626e-06	-5.08919e-06	-1.89965e-06	-1.30288e-05	3.54522e-06	-0.000157216	-8.13786e-07	3.6855e-06	9.314e-05	9.32817e-05	1.38756e-05	1.18915e-05	1.62885e-05	1.298e-05	5.07085e-05	5.10432e-05	2.6337e-05	2.38144e-05	5.0511e-06	3.62061e-06	-2.93139e-06	-3.46598e-06	-3.31487e-06	-2.75368e-06	4.47695e-07	8.58381e-07	-1.29735e-06	4.60396e-07	6.8938e-05	5.93071e-05	-3.62612e-05	-1.26044e-05	5.39268e-07	-5.94657e-05	-0.000139863	1.12833e-05	3.2156e-06
2	6.55009e-05	6.33987e-05	1.35466e-05	1.28011e-05	9.94631e-06	6.74355e-06	6.77024e-05	6.56956e-05	1.83088e-05	1.9863e-05	1.89865e-05	1.74484e-05	-1.13535e-06	-2.71014e-06	-1.97022e-07	-7.12345e-06	4.2297e-06	-0.00012202	1.52885e-06	6.64031e-06	8.86275e-05	8.88377e-05	1.60299e-05	1.40746e-05	1.60116e-05	1.29475e-05	4.96488e-05	5.01349e-05	2.91532e-05	2.69391e-05	9.43014e-06	8.45786e-06	-2.4709e-06	-2.89044e-06	-2.44477e-06	-1.99317e-06	1.02691e-06	1.34912e-06	1.30465e-07	1.79288e-06	6.97942e-05	6.02311e-05	-2.98604e-05	-6.91682e-06	1.60589e-06	-5.34717e-05	-6.10732e-05	1.15214e-05	6.43244e-06
2.5	5.92077e-05	5.71347e-05	1.63123e-05	1.58892e-05	1.03709e-05	7.25144e-06	6.73179e-05	6.54443e-05	1.95167e-05	2.21041e-05	2.37179e-05	2.22277e-05	-1.67744e-06	-3.1318e-06	-4.96961e-07	-6.30433e-06	6.06055e-06	-9.7631e-05	3.4936e-06	8.24572e-06	8.34991e-05	8.39437e-05	1.8495e-05	1.65958e-05	1.84896e-05	1.57283e-05	5.08986e-05	5.14157e-05	3.12894e-05	2.93036e-05	1.2279e-05	1.18501e-05	-1.5599e-06	-1.9589e-06	-1.73153e-06	-1.32929e-06	2.37295e-06	2.59123e-06	1.52716e-06	3.19052e-06	7.01659e-05	6.05663e-05	-2.27474e-05	-1.43966e-06	3.70159e-06	-4.93257e-05	-7.08061e-06	1.12171e-05	8.49286e-06
3	5.42224e-05	5.21129e-05	2.32165e-05	2.27043e-05	1.24308e-05	9.30681e-06	6.67529e-05	6.49155e-05	2.16419e-05	2.43922e-05	1.84968e-05	1.72589e-05	7.79835e-06	6.31975e-06	5.61383e-06	1.44737e-07	4.00537e-06	-5.25081e-05	2.39193e-06	6.83187e-06	7.73334e-05	7.78365e-05	2.30183e-05	2.09597e-05	1.55356e-05	1.29174e-05	4.91617e-05	4.96418e-05	3.69826e-05	3.50588e-05	2.06462e-05	2.00673e-05	-1.96551e-06	-2.2089e-06	-1.36003e-06	-8.61028e-07	1.45097e-06	1.64227e-06	2.31752e-06	3.9276e-06	6.6386e-05	5.81635e-05	-1.59215e-05	2.63438e-06	1.86441e-06	-4.92829e-05	6.86846e-06	9.55151e-06	1.20421e-05
3.5	4.98938e-05	4.77743e-05	3.11597e-05	3.06304e-05	1.47944e-05	1.16146e-05	6.62332e-05	6.44437e-05	2.30039e-05	2.57945e-05	1.49488e-05	1.39191e-05	1.51503e-05	1.36491e-05	1.02226e-05	4.8213e-06	4.94272e-06	-1.83122e-05	1.45267e-06	5.52318e-06	7.17234e-05	7.22609e-05	2.81543e-05	2.58994e-05	1.60943e-05	1.36575e-05	4.99671e-05	5.03571e-05	4.10739e-05	3.92019e-05	2.72874e-05	2.62772e-05	-1.19391e-06	-1.27562e-06	-8.0911e-07	-2.84043e-07	2.00307e-06	2.14453e-06	2.69372e-06	4.27687e-06	6.1401e-05	5.453e-05	-7.50416e-06	8.32975e-06	2.41577e-06	-4.75365e-05	1.40028e-05	1.02059e-05	1.4812e-05
4	4.63037e-05	4.42148e-05	3.99458e-05	3.93611e-05	1.74437e-05	1.41633e-05	6.55873e-05	6.38482e-05	2.38162e-05	2.63807e-05	1.30384e-05	1.21962e-05	2.09402e-05	1.94109e-05	1.36713e-05	8.4873e-06	8.28703e-06	4.80915e-06	8.09622e-07	4.6015e-06	6.67966e-05	6.73261e-05	3.385e-05	3.1348e-05	1.95674e-05	1.73518e-05	5.28454e-05	5.31147e-05	4.36314e-05	4.18091e-05	3.223e-05	3.05176e-05	5.89562e-07	6.92017e-07	-5.09187e-08	4.46387e-07	3.79803e-06	3.87222e-06	2.7175e-06	4.26985e-06	5.53805e-05	4.98217e-05	2.18925e-06	1.54892e-05	4.992e-06	-4.39128e-05	1.67086e-05	1.30087e-05	1.69368e-05
4.5	4.35334e-05	4.15307e-05	4.93789e-05	4.859e-05	2.03609e-05	1.69415e-05	6.46436e-05	6.29483e-05	2.42924e-05	2.62205e-05	1.27299e-05	1.20775e-05	2.573e-05	2.416e-05	1.63015e-05	1.19047e-05	1.34527e-05	1.67082e-05	5.96558e-07	4.34867e-06	6.26808e-05	6.31414e-05	4.00524e-05	3.72385e-05	2.53566e-05	2.34033e-05	5.73273e-05	5.74679e-05	4.47236e-05	4.29566e-05	3.55016e-05	3.28262e-05	3.21959e-06	3.54507e-06	9.42393e-07	1.37499e-06	6.60468e-06	6.59952e-06	2.45056e-06	3.93807e-06	4.8494e-05	4.41946e-05	1.28436e-05	2.39556e-05	9.22946e-06	-3.82377e-05	1.73722e-05	1.77884e-05	1.85506e-05
5	4.15268e-05	3.96807e-05	5.99121e-05	5.87347e-05	2.40918e-05	2.04294e-05	6.30834e-05	6.1462e-05	2.41916e-05	2.50218e-05	1.47837e-05	1.43225e-05	2.96197e-05	2.78418e-05	1.91634e-05	1.65376e-05	2.01231e-05	1.48448e-05	1.06999e-06	5.08284e-06	5.95275e-05	5.98571e-05	4.7532e-05	4.40705e-05	2.89353e-05	2.71413e-05	6.1859e-05	6.1752e-05	4.44282e-05	4.27558e-05	3.73517e-05	3.34085e-05	6.35839e-06	7.26226e-06	2.57546e-06	2.74443e-06	1.04328e-05	1.00802e-05	2.27195e-06	3.45607e-06	4.06161e-05	3.74613e-05	2.35569e-05	3.30144e-05	1.37111e-05	-3.26057e-05	2.03272e-05	2.407e-05	2.01118e-05
5.5	3.93208e-05	3.76208e-05	6.37557e-05	6.27594e-05	2.34542e-05	1.99045e-05	6.3741e-05	6.21213e-05	2.44963e-05	2.52436e-05	1.43605e-05	1.39165e-05	1.95721e-05	1.81518e-05	1.30412e-05	1.07205e-05	2.8839e-05	2.29663e-05	2.35354e-06	5.97032e-06	5.66443e-05	5.69749e-05	4.85889e-05	4.54584e-05	4.83857e-05	4.7395e-05	7.2482e-05	7.25221e-05	4.0715e-05	3.91279e-05	3.30393e-05	2.943e-05	1.15402e-05	1.21516e-05	3.2674e-06	3.73906e-06	1.51417e-05	1.51249e-05	2.42896e-06	3.87484e-06	3.796e-05	3.48301e-05	3.48516e-05	4.2052e-05	2.18109e-05	-2.16157e-05	3.36971e-05	3.1135e-05	1.86263e-05
6	3.76451e-05	3.60716e-05	6.5417e-05	6.46093e-05	2.2779e-05	1.93552e-05	6.44846e-05	6.28961e-05	2.53532e-05	2.56493e-05	1.45437e-05	1.41493e-05	1.49144e-05	1.3766e-05	9.62537e-06	7.56693e-06	3.2497e-05	2.39532e-05	3.75342e-06	7.15437e-06	5.40618e-05	5.43601e-05	5.02268e-05	4.7018e-05	6.16512e-05	6.14048e-05	8.02646e-05	8.03251e-05	3.81843e-05	3.66161e-05	2.94889e-05	2.61517e-05	1.48646e-05	1.54901e-05	4.81639e-06	5.788e-06	1.8733e-05	1.86374e-05	3.31778e-06	4.58632e-06	3.51408e-05	3.22757e-05	4.23676e-05	4.79272e-05	2.6584e-05	-1.34794e-05	3.87318e-05	3.53948e-05	1.75571e-05
6.5	3.62266e-05	3.47548e-05	6.4355e-05	6.38599e-05	2.1578e-05	1.83174e-05	6.5534e-05	6.40164e-05	2.65833e-05	2.63993e-05	1.44919e-05	1.4138e-05	1.1772e-05	1.08308e-05	7.46714e-06	5.45563e-06	3.22623e-05	2.28191e-05	5.27579e-06	8.44165e-06	5.16693e-05	5.19468e-05	5.14719e-05	4.78747e-05	6.88382e-05	6.92595e-05	8.55791e-05	8.55285e-05	3.62812e-05	3.46944e-05	2.60419e-05	2.32354e-05	1.67018e-05	1.76521e-05	7.12575e-06	8.68606e-06	2.16021e-05	2.10632e-05	5.27431e-06	5.96949e-06	3.32109e-05	3.05768e-05	4.59221e-05	5.02781e-05	2.80344e-05	-8.95584e-06	4.03573e-05	3.69822e-05	1.66838e-05
7	3.50123e-05	3.3614e-05	6.05067e-05	6.04058e-05	1.97784e-05	1.67286e-05	6.68793e-05	6.54563e-05	2.82233e-05	2.7567e-05	1.3744e-05	1.34273e-05	1.03027e-05	9.52243e-06	6.60028e-06	4.42203e-06	2.79319e-05	2.16486e-05	6.75748e-06	9.67444e-06	4.93822e-05	4.96504e-05	5.20524e-05	4.79039e-05	7.04541e-05	7.14726e-05	8.83705e-05	8.81403e-05	3.51732e-05	3.35274e-05	2.28782e-05	2.08964e-05	1.70328e-05	1.8486e-05	9.80409e-06	1.20277e-05	2.34062e-05	2.22865e-05	8.23812e-06	8.07778e-06	3.23295e-05	2.98893e-05	4.575e-05	4.92237e-05	2.61387e-05	-7.82523e-06	3.85015e-05	3.5764e-05	1.6033e-05
7.5	3.39446e-05	3.25908e-05	5.43068e-05	5.47582e-05	1.75052e-05	1.47072e-05	6.89851e-05	6.76544e-05	3.03734e-05	2.91927e-05	1.23189e-05	1.20483e-05	1.14294e-05	1.06996e-05	8.03822e-06	5.51067e-06	1.91387e-05	1.89605e-05	8.45413e-06	1.11172e-05	4.71627e-05	4.74265e-05	5.15515e-05	4.66682e-05	6.61188e-05	6.78087e-05	8.60459e-05	8.58082e-05	3.5197e-05	3.34601e-05	2.04417e-05	1.95655e-05	1.58959e-05	1.78461e-05	1.21165e-05	1.58806e-05	2.27895e-05	2.12742e-05	1.06694e-05	9.81033e-06	3.24167e-05	3.02154e-05	4.12576e-05	4.38578e-05	1.90502e-05	-1.093e-05	3.18935e-05	3.05224e-05	1.582e-05
8	3.30201e-05	3.16814e-05	5.11909e-05	5.22266e-05	1.71178e-05	1.43772e-05	6.83464e-05	6.72841e-05	3.07911e-05	2.94194e-05	1.36772e-05	1.34597e-05	9.59681e-06	8.78212e-06	8.00414e-06	5.64093e-06	1.88088e-05	1.54365e-05	8.37436e-06	1.07581e-05	4.52367e-05	4.54994e-05	5.37179e-05	4.79125e-05	4.77049e-05	4.88646e-05	8.72493e-05	8.61179e-05	3.45676e-05	3.27779e-05	2.07351e-05	1.98585e-05	1.44315e-05	1.80171e-05	1.63e-05	1.91356e-05	2.86636e-05	2.58889e-05	1.81401e-05	1.52361e-05	3.06813e-05	2.88046e-05	3.30028e-05	3.71317e-05	1.57792e-05	-1.98994e-05	3.15017e-05	3.0283e-05	1.65412e-05
8.5	3.21363e-05	3.08192e-05	4.70082e-05	4.82562e-05	1.63864e-05	1.37299e-05	6.78821e-05	6.69871e-05	3.07237e-05	2.93759e-05	1.42159e-05	1.40429e-05	8.6283e-06	7.8255e-06	7.87581e-06	5.62084e-06	1.68045e-05	1.40845e-05	7.64743e-06	9.82467e-06	4.33664e-05	4.36225e-05	5.42126e-05	4.85377e-05	3.51489e-05	3.58634e-05	8.83926e-05	8.6797e-05	3.41663e-05	3.22989e-05	2.06425e-05	1.99485e-05	1.32061e-05	1.71125e-05	1.7455e-05	1.91502e-05	3.19081e-05	3.01599e-05	2.36893e-05	2.0037e-05	2.97387e-05	2.80033e-05	2.79509e-05	3.27477e-05	1.3258e-05	-2.58099e-05	3.02785e-05	2.95825e-05	1.69134e-05
9	3.12746e-05	2.99846e-05	4.32456e-05	4.44908e-05	1.58536e-05	1.32592e-05	6.73515e-05	6.65607e-05	2.99837e-05	2.88537e-05	1.4767e-05	1.46388e-05	7.6658e-06	6.89649e-06	7.55209e-06	5.50326e-06	1.58941e-05	1.34344e-05	6.35622e-06	8.38568e-06	4.15982e-05	4.18393e-05	5.35604e-05	4.87527e-05	2.56153e-05	2.58579e-05	8.8727e-05	8.7019e-05	3.37671e-05	3.18232e-05	2.08848e-05	2.02646e-05	1.24678e-05	1.5745e-05	1.61647e-05	1.67375e-05	3.37793e-05	3.47984e-05	2.70798e-05	2.38105e-05	2.89352e-05	2.72539e-05	2.48368e-05	2.99104e-05	1.16129e-05	-3.02225e-05	2.95115e-05	2.93007e-05	1.71832e-05
9.5	3.04145e-05	2.91587e-05	4.0179e-05	4.11972e-05	1.55263e-05	1.29742e-05	6.65896e-05	6.58379e-05	2.85802e-05	2.78687e-05	1.52759e-05	1.51933e-05	6.28532e-06	5.58798e-06	6.71338e-06	4.99867e-06	1.66757e-05	1.42337e-05	4.47411e-06	6.41379e-06	3.99242e-05	4.01391e-05	5.17896e-05	4.86116e-05	1.98036e-05	1.95451e-05	8.88404e-05	8.73722e-05	3.32526e-05	3.12365e-05	2.14136e-05	2.07366e-05	1.23502e-05	1.41385e-05	1.2503e-05	1.1878e-05	3.46271e-05	3.98799e-05	2.86204e-05	2.67008e-05	2.82293e-05	2.6504e-05	2.39611e-05	2.89174e-05	1.13724e-05	-3.2705e-05	2.97503e-05	2.98813e-05	1.72684e-05
10	2.95221e-05	2.83088e-05	3.83653e-05	3.89264e-05	1.53461e-05	1.28253e-05	6.55601e-05	6.4734e-05	2.64653e-05	2.63205e-05	1.56967e-05	1.5661e-05	4.54485e-06	3.96502e-06	5.30954e-06	3.99877e-06	1.90985e-05	1.66211e-05	1.92128e-06	3.83963e-06	3.83542e-05	3.85228e-05	4.87814e-05	4.82747e-05	1.89307e-05	1.81965e-05	8.99192e-05	8.92828e-05	3.26019e-05	3.05228e-05	2.20967e-05	2.12025e-05	1.30859e-05	1.24159e-05	5.4846e-06	3.99676e-06	3.33658e-05	4.51378e-05	2.8886e-05	2.99657e-05	2.75991e-05	2.58828e-05	2.6005e-05	3.01794e-05	1.27802e-05	-3.25484e-05	3.11283e-05	3.14919e-05	1.71749e-05
10.5	2.87555e-05	2.75945e-05	3.42997e-05	3.47535e-05	1.50472e-05	1.25857e-05	6.61736e-05	6.54352e-05	2.59486e-05	2.61086e-05	1.64124e-05	1.6405e-05	5.38772e-06	4.81076e-06	5.52601e-06	4.23533e-06	1.7982e-05	1.5874e-05	1.96695e-06	3.8489e-06	3.68764e-05	3.70388e-05	4.60126e-05	4.56218e-05	1.86763e-05	1.80407e-05	8.19804e-05	8.1787e-05	3.26283e-05	3.04569e-05	2.27822e-05	2.19691e-05	1.26584e-05	1.04229e-05	3.50785e-06	3.18214e-06	3.31589e-05	4.6955e-05	2.00336e-05	2.38458e-05	2.71713e-05	2.52384e-05	2.64771e-05	3.0569e-05	1.19647e-05	-3.19811e-05	2.93124e-05	3.03489e-05	1.65163e-05
11	2.79923e-05	2.68729e-05	3.10273e-05	3.13337e-05	1.481e-05	1.24152e-05	6.55058e-05	6.48457e-05	2.5547e-05	2.59993e-05	1.71072e-05	1.71397e-05	5.48016e-06	4.92524e-06	5.28768e-06	4.16241e-06	1.82817e-05	1.62665e-05	1.77165e-06	3.63275e-06	3.55308e-05	3.56573e-05	4.32796e-05	4.32553e-05	1.86614e-05	1.80129e-05	7.57558e-05	7.60398e-05	3.25836e-05	3.03145e-05	2.3669e-05	2.28718e-05	1.19384e-05	8.92208e-06	1.83119e-06	1.80561e-06	3.39957e-05	4.75784e-05	1.4615e-05	1.92413e-05	2.67125e-05	2.47073e-05	2.64686e-05	3.03397e-05	1.18007e-05	-3.13938e-05	2.84782e-05	3.02061e-05	1.55837e-05
11.5	2.72447e-05	2.61573e-05	2.82523e-05	2.84893e-05	1.4532e-05	1.22222e-05	6.41149e-05	6.35372e-05	2.5624e-05	2.62305e-05	1.78487e-05	1.79274e-05	5.56275e-06	5.01602e-06	5.05694e-06	4.07488e-06	1.87529e-05	1.69297e-05	1.92187e-06	3.76875e-06	3.43151e-05	3.43889e-05	4.07929e-05	4.08493e-05	1.86112e-05	1.7988e-05	6.99896e-05	7.0745e-05	3.26274e-05	3.02617e-05	2.46747e-05	2.38914e-05	1.07579e-05	7.86916e-06	1.27313e-06	1.51897e-06	3.53131e-05	4.64631e-05	1.08373e-05	1.51077e-05	2.62497e-05	2.43691e-05	2.56376e-05	2.92793e-05	1.16412e-05	-3.07951e-05	2.77935e-05	3.03352e-05	1.44189e-05
12	2.65134e-05	2.54471e-05	2.59191e-05	2.61911e-05	1.42031e-05	1.19963e-05	6.20031e-05	6.15262e-05	2.6227e-05	2.68463e-05	1.86471e-05	1.87757e-05	5.55085e-06	4.99583e-06	4.8111e-06	3.9438e-06	1.93929e-05	1.79517e-05	2.46732e-06	4.29949e-06	3.32271e-05	3.32334e-05	3.87167e-05	3.84434e-05	1.80351e-05	1.7467e-05	6.47247e-05	6.58675e-05	3.27357e-05	3.02831e-05	2.58105e-05	2.50349e-05	9.09924e-06	7.37974e-06	2.22663e-06	2.69211e-06	3.74855e-05	4.38137e-05	8.85056e-06	1.14899e-05	2.5766e-05	2.41175e-05	2.36752e-05	2.72373e-05	1.14565e-05	-3.04101e-05	2.73166e-05	3.07052e-05	1.30518e-05
12.5	2.57899e-05	2.47418e-05	2.40605e-05	2.44755e-05	1.38197e-05	1.17446e-05	5.90351e-05	5.86423e-05	2.73238e-05	2.78752e-05	1.95117e-05	1.96933e-05	5.39278e-06	4.81296e-06	4.53186e-06	3.75778e-06	2.01962e-05	1.93215e-05	3.36728e-06	5.13999e-06	3.22962e-05	3.22078e-05	3.71782e-05	3.61719e-05	1.66537e-05	1.61462e-05	6.03182e-05	6.17562e-05	3.28998e-05	3.03408e-05	2.70428e-05	2.63249e-05	6.87104e-06	7.50613e-06	4.65225e-06	5.22019e-06	4.11703e-05	3.94137e-05	9.33139e-06	9.00789e-06	2.52266e-05	2.3857e-05	2.05225e-05	2.42652e-05	1.12357e-05	-3.03989e-05	2.68741e-05	3.1013e-05	1.14271e-05
13	2.50764e-05	2.40073e-05	2.37524e-05	2.41253e-05	1.33265e-05	1.13438e-05	5.63015e-05	5.58791e-05	2.79211e-05	2.81687e-05	2.04447e-05	2.07031e-05	5.52766e-06	4.94875e-06	4.42324e-06	3.75928e-06	2.10367e-05	2.03436e-05	3.48318e-06	5.30304e-06	3.14014e-05	3.12344e-05	3.52307e-05	3.45775e-05	1.66603e-05	1.6136e-05	5.82742e-05	5.98523e-05	3.29858e-05	3.05013e-05	2.85319e-05	2.78957e-05	5.51273e-06	7.45953e-06	4.94868e-06	5.1724e-06	3.99628e-05	3.70859e-05	9.38712e-06	8.47119e-06	2.4862e-05	2.35108e-05	1.92302e-05	2.21231e-05	1.11298e-05	-2.98745e-05	2.74184e-05	3.23082e-05	1.07276e-05
13.5	2.43406e-05	2.32488e-05	2.33726e-05	2.37662e-05	1.2827e-05	1.09307e-05	5.35799e-05	5.31794e-05	2.83567e-05	2.84254e-05	2.14563e-05	2.17662e-05	5.60038e-06	5.01019e-06	4.34651e-06	3.75328e-06	2.19104e-05	2.15787e-05	3.68501e-06	5.55677e-06	3.06084e-05	3.03631e-05	3.35592e-05	3.29541e-05	1.62518e-05	1.57393e-05	5.59675e-05	5.75701e-05	3.30023e-05	3.06696e-05	3.02001e-05	2.95233e-05	4.41811e-06	7.71746e-06	5.91084e-06	5.94819e-06	4.00051e-05	3.5921e-05	9.46515e-06	7.93422e-06	2.44825e-05	2.27421e-05	1.68641e-05	1.99229e-05	1.09924e-05	-2.95107e-05	2.79999e-05	3.302e-05	1.01041e-05
14	2.3585e-05	2.24713e-05	2.31844e-05	2.35969e-05	1.23167e-05	1.04978e-05	5.10294e-05	5.06409e-05	2.84273e-05	2.84431e-05	2.25633e-05	2.29114e-05	5.68973e-06	5.08574e-06	4.33999e-06	3.79741e-06	2.28032e-05	2.28553e-05	3.77199e-06	5.68524e-06	2.99095e-05	2.95865e-05	3.20192e-05	3.14719e-05	1.58181e-05	1.53131e-05	5.3855e-05	5.53736e-05	3.29238e-05	3.08116e-05	3.20421e-05	3.12904e-05	3.72804e-06	8.20748e-06	6.72398e-06	6.62466e-06	4.04031e-05	3.61489e-05	9.3386e-06	7.83921e-06	2.41145e-05	2.16276e-05	1.4261e-05	1.81291e-05	1.08564e-05	-2.9177e-05	2.85561e-05	3.31201e-05	9.7115e-06
14.5	2.2821e-05	2.16879e-05	2.31333e-05	2.35584e-05	1.18059e-05	1.00522e-05	4.87644e-05	4.83818e-05	2.81027e-05	2.81836e-05	2.3783e-05	2.41585e-05	5.79931e-06	5.18082e-06	4.41549e-06	3.90385e-06	2.37112e-05	2.41684e-05	3.74939e-06	5.69849e-06	2.92923e-05	2.88967e-05	3.05978e-05	3.01149e-05	1.535e-05	1.48479e-05	5.18053e-05	5.31178e-05	3.27309e-05	3.09051e-05	3.40796e-05	3.32071e-05	3.49314e-06	9.10697e-06	7.3646e-06	7.20408e-06	4.10756e-05	3.79699e-05	8.71705e-06	8.01379e-06	2.37673e-05	2.01143e-05	1.16065e-05	1.68274e-05	1.07189e-05	-2.88835e-05	2.90907e-05	3.2623e-05	9.58129e-06
15	2.20904e-05	2.0915e-05	2.31375e-05	2.35686e-05	1.13052e-05	9.6065e-06	4.67909e-05	4.64113e-05	2.74772e-05	2.7742e-05	2.51456e-05	2.55337e-05	5.93601e-06	5.30635e-06	4.58527e-06	4.08337e-06	2.46613e-05	2.55375e-05	3.60112e-06	5.55784e-06	2.87654e-05	2.83001e-05	2.93146e-05	2.88822e-05	1.48683e-05	1.43626e-05	4.97155e-05	5.06932e-05	3.24408e-05	3.0969e-05	3.63263e-05	3.52851e-05	3.73624e-06	1.18386e-05	7.97365e-06	7.78179e-06	4.2169e-05	4.14412e-05	7.57321e-06	8.44638e-06	2.34246e-05	1.77108e-05	8.87433e-06	1.60595e-05	1.05796e-05	-2.86346e-05	2.97423e-05	3.15251e-05	9.70076e-06
15.5	2.13132e-05	2.01635e-05	2.29516e-05	2.34122e-05	1.08913e-05	9.25608e-06	4.53014e-05	4.49052e-05	2.62144e-05	2.68382e-05	2.66251e-05	2.70795e-05	6.07199e-06	5.44129e-06	4.83354e-06	4.37439e-06	2.57088e-05	2.68708e-05	4.01627e-06	5.92766e-06	2.8218e-05	2.77055e-05	2.80675e-05	2.7664e-05	1.43037e-05	1.37998e-05	4.77824e-05	4.884e-05	3.19775e-05	3.06627e-05	3.85177e-05	3.74202e-05	3.57707e-06	1.20315e-05	8.07163e-06	7.99285e-06	4.45537e-05	4.33257e-05	8.16557e-06	9.06911e-06	2.30642e-05	1.83345e-05	6.21116e-06	1.5327e-05	1.04567e-05	-2.84172e-05	2.85402e-05	2.9188e-05	9.48746e-06
16	2.06237e-05	1.9518e-05	2.29429e-05	2.34376e-05	1.0518e-05	8.93733e-06	4.39459e-05	4.35495e-05	2.48722e-05	2.5725e-05	2.83009e-05	2.88547e-05	6.24357e-06	5.6219e-06	5.19352e-06	4.76631e-06	2.68499e-05	2.83142e-05	4.46485e-06	6.36902e-06	2.77149e-05	2.71699e-05	2.69209e-05	2.65366e-05	1.37479e-05	1.32423e-05	4.59515e-05	4.70099e-05	3.14089e-05	3.0234e-05	4.09779e-05	3.96801e-05	3.60477e-06	1.58992e-05	8.28583e-06	8.42621e-06	4.66649e-05	4.58392e-05	8.66332e-06	9.85471e-06	2.27783e-05	1.83948e-05	4.75343e-06	1.48054e-05	1.03245e-05	-2.82637e-05	2.75445e-05	2.71331e-05	9.40057e-06
16.5	2.00298e-05	1.89735e-05	2.30042e-05	2.35429e-05	1.01989e-05	8.67005e-06	4.27506e-05	4.23664e-05	2.34851e-05	2.44704e-05	3.01734e-05	3.08657e-05	6.44689e-06	5.84734e-06	5.66261e-06	5.26637e-06	2.81216e-05	2.98647e-05	5.08026e-06	6.9829e-06	2.72413e-05	2.66807e-05	2.58705e-05	2.54846e-05	1.32101e-05	1.27008e-05	4.42222e-05	4.53111e-05	3.0751e-05	2.96581e-05	4.3663e-05	4.20703e-05	3.64436e-06	2.33923e-05	8.66692e-06	9.06387e-06	4.87725e-05	4.8284e-05	9.55802e-06	1.08143e-05	2.25278e-05	1.84284e-05	4.20895e-06	1.4395e-05	1.01897e-05	-2.81585e-05	2.64673e-05	2.52082e-05	9.31283e-06
17	1.95343e-05	1.85339e-05	2.31074e-05	2.36952e-05	9.93732e-06	8.45724e-06	4.17278e-05	4.13652e-05	2.21001e-05	2.3103e-05	3.22408e-05	3.31075e-05	6.68341e-06	6.11807e-06	6.24169e-06	5.87733e-06	2.9525e-05	3.15103e-05	5.89908e-06	7.81394e-06	2.67885e-05	2.62305e-05	2.49024e-05	2.4497e-05	1.26935e-05	1.21795e-05	4.25849e-05	4.37427e-05	3.00074e-05	2.89338e-05	4.65986e-05	4.46152e-05	3.65963e-06	3.38864e-05	9.22333e-06	9.91242e-06	5.07794e-05	5.05085e-05	1.08414e-05	1.18863e-05	2.23079e-05	1.85144e-05	4.58329e-06	1.40582e-05	1.00511e-05	-2.81023e-05	2.53035e-05	2.34908e-05	9.21023e-06
17.5	1.91624e-05	1.82106e-05	2.32188e-05	2.38544e-05	9.74184e-06	8.30961e-06	4.08882e-05	4.05339e-05	2.0787e-05	2.1669e-05	3.44534e-05	3.5537e-05	6.96666e-06	6.43851e-06	6.94386e-06	6.61474e-06	3.09982e-05	3.31581e-05	6.93615e-06	8.89088e-06	2.6355e-05	2.58093e-05	2.39989e-05	2.35651e-05	1.22037e-05	1.16822e-05	4.10423e-05	4.23031e-05	2.91477e-05	2.80416e-05	4.98411e-05	4.73513e-05	3.63945e-06	4.56223e-05	1.00259e-05	1.09885e-05	5.27887e-05	5.2597e-05	1.2536e-05	1.30545e-05	2.21672e-05	1.87866e-05	5.79305e-06	1.37219e-05	9.9071e-06	-2.81136e-05	2.41238e-05	2.20626e-05	9.08929e-06
18	1.8753e-05	1.78235e-05	2.32992e-05	2.39802e-05	9.50251e-06	8.10856e-06	3.97218e-05	3.94635e-05	1.96299e-05	2.05084e-05	3.68418e-05	3.80995e-05	7.21142e-06	6.73428e-06	7.62775e-06	7.31771e-06	3.26769e-05	3.50749e-05	7.89738e-06	9.87572e-06	2.59926e-05	2.54856e-05	2.32211e-05	2.27715e-05	1.18109e-05	1.12952e-05	3.95874e-05	4.08272e-05	2.84561e-05	2.73908e-05	5.3375e-05	5.02349e-05	3.81195e-06	6.50838e-05	1.12253e-05	1.22163e-05	5.42083e-05	5.46706e-05	1.41688e-05	1.46107e-05	2.18151e-05	1.85559e-05	6.11638e-06	1.35904e-05	9.76564e-06	-2.79894e-05	2.34827e-05	2.11504e-05	9.05564e-06
18.5	1.83875e-05	1.74885e-05	2.31984e-05	2.38905e-05	9.30921e-06	7.95102e-06	3.87854e-05	3.8575e-05	1.8638e-05	1.94491e-05	3.92879e-05	4.06852e-05	7.49332e-06	7.05045e-06	8.40086e-06	8.10692e-06	3.43929e-05	3.69199e-05	9.04702e-06	1.10817e-05	2.56432e-05	2.51883e-05	2.24672e-05	2.2012e-05	1.14384e-05	1.09327e-05	3.8201e-05	3.94284e-05	2.76867e-05	2.66645e-05	5.73657e-05	5.35164e-05	3.9661e-06	7.94915e-05	1.24839e-05	1.35164e-05	5.59231e-05	5.6709e-05	1.58977e-05	1.61318e-05	2.14235e-05	1.82042e-05	6.43166e-06	1.34762e-05	9.61236e-06	-2.79239e-05	2.27694e-05	2.03271e-05	9.00748e-06
19	1.80462e-05	1.71708e-05	2.29186e-05	2.35901e-05	9.14028e-06	7.81538e-06	3.7972e-05	3.77668e-05	1.7831e-05	1.85635e-05	4.17369e-05	4.32444e-05	7.80307e-06	7.37051e-06	9.23992e-06	8.95411e-06	3.60869e-05	3.86508e-05	1.03491e-05	1.24694e-05	2.53196e-05	2.49237e-05	2.1737e-05	2.12988e-05	1.11005e-05	1.06104e-05	3.68879e-05	3.80783e-05	2.68625e-05	2.5914e-05	6.18118e-05	5.71834e-05	4.15448e-06	8.94911e-05	1.38666e-05	1.48581e-05	5.78256e-05	5.88094e-05	1.76722e-05	1.77003e-05	2.10011e-05	1.78324e-05	6.33065e-06	1.33762e-05	9.45017e-06	-2.78791e-05	2.21262e-05	1.9655e-05	8.97293e-06
19.5	1.77173e-05	1.68597e-05	2.24602e-05	2.30784e-05	8.98826e-06	7.69369e-06	3.72548e-05	3.70149e-05	1.72087e-05	1.78668e-05	4.41885e-05	4.57745e-05	8.13788e-06	7.69139e-06	1.01375e-05	9.8499e-06	3.77437e-05	4.02529e-05	1.18378e-05	1.40797e-05	2.50266e-05	2.46939e-05	2.10244e-05	2.06262e-05	1.07975e-05	1.03294e-05	3.56449e-05	3.67752e-05	2.59961e-05	2.51494e-05	6.66943e-05	6.12263e-05	4.37995e-06	9.49761e-05	1.53259e-05	1.62102e-05	5.96939e-05	6.08254e-05	1.94723e-05	1.93156e-05	2.05448e-05	1.7494e-05	5.73818e-06	1.32874e-05	9.27968e-06	-2.78475e-05	2.15433e-05	1.91139e-05	8.95423e-06
20	1.74045e-05	1.65602e-05	2.1811e-05	2.23273e-05	8.8559e-06	7.58759e-06	3.6582e-05	3.63151e-05	1.67736e-05	1.7359e-05	4.67223e-05	4.83434e-05	8.50126e-06	8.03181e-06	1.1112e-05	1.08027e-05	3.93781e-05	4.17287e-05	1.35518e-05	1.5983e-05	2.4777e-05	2.45129e-05	2.03233e-05	1.99827e-05	1.05055e-05	1.00689e-05	3.4458e-05	3.55164e-05	2.51486e-05	2.44554e-05	7.21081e-05	6.57064e-05	4.64273e-06	9.52215e-05	1.67577e-05	1.75547e-05	6.15626e-05	6.23933e-05	2.12606e-05	2.09497e-05	2.00598e-05	1.7169e-05	4.54596e-06	1.32048e-05	9.10431e-06	-2.78313e-05	2.10181e-05	1.8676e-05	8.94822e-06
20.5	1.70935e-05	1.62709e-05	2.13104e-05	2.17966e-05	8.71004e-06	7.4701e-06	3.60052e-05	3.55786e-05	1.6375e-05	1.68844e-05	4.87581e-05	5.05604e-05	8.89202e-06	8.30467e-06	1.20701e-05	1.17194e-05	4.05094e-05	4.27296e-05	1.56241e-05	1.81864e-05	2.45375e-05	2.43053e-05	1.96143e-05	1.93583e-05	1.02699e-05	9.86342e-06	3.34228e-05	3.43755e-05	2.39686e-05	2.33329e-05	7.73967e-05	7.02581e-05	4.94058e-06	9.33914e-05	1.82497e-05	1.88401e-05	6.21879e-05	6.45969e-05	2.34757e-05	2.28785e-05	1.98905e-05	1.68192e-05	3.7157e-06	1.3079e-05	8.94301e-06	-2.77942e-05	2.05373e-05	1.82248e-05	8.99032e-06
21	1.67943e-05	1.59922e-05	2.08218e-05	2.12629e-05	8.55333e-06	7.33724e-06	3.52779e-05	3.47148e-05	1.60785e-05	1.65283e-05	5.10219e-05	5.30118e-05	9.30593e-06	8.60294e-06	1.31217e-05	1.26814e-05	4.15938e-05	4.36441e-05	1.80525e-05	2.08331e-05	2.43934e-05	2.418e-05	1.89488e-05	1.87614e-05	1.00622e-05	9.68808e-06	3.24737e-05	3.33384e-05	2.28304e-05	2.22075e-05	8.31631e-05	7.51251e-05	5.30804e-06	9.31382e-05	1.95581e-05	2.01013e-05	6.13534e-05	6.51107e-05	2.58131e-05	2.49532e-05	1.96997e-05	1.66008e-05	2.9338e-06	1.29723e-05	8.76966e-06	-2.77661e-05	2.00834e-05	1.78347e-05	9.05271e-06
21.5	1.6508e-05	1.57284e-05	2.04005e-05	2.07961e-05	8.38646e-06	7.19044e-06	3.43975e-05	3.37428e-05	1.58414e-05	1.62415e-05	5.34396e-05	5.56516e-05	9.74357e-06	8.92546e-06	1.42474e-05	1.36703e-05	4.2565e-05	4.44297e-05	2.09065e-05	2.3978e-05	2.43341e-05	2.41279e-05	1.83144e-05	1.81809e-05	9.86027e-06	9.52111e-06	3.16087e-05	3.24057e-05	2.17285e-05	2.1082e-05	8.92124e-05	8.02135e-05	5.73776e-06	9.4067e-05	2.06549e-05	2.13202e-05	5.93459e-05	6.41736e-05	2.83474e-05	2.72126e-05	1.95632e-05	1.64603e-05	2.27325e-06	1.28782e-05	8.59398e-06	-2.77333e-05	1.96562e-05	1.74696e-05	9.13348e-06
22	1.62309e-05	1.54764e-05	2.00708e-05	2.04263e-05	8.20692e-06	7.02724e-06	3.33649e-05	3.26625e-05	1.56399e-05	1.60052e-05	5.59941e-05	5.84625e-05	1.02013e-05	9.27119e-06	1.54183e-05	1.46724e-05	4.34363e-05	4.51083e-05	2.42545e-05	2.76847e-05	2.4354e-05	2.41447e-05	1.77103e-05	1.76136e-05	9.66291e-06	9.35977e-06	3.08247e-05	3.15733e-05	2.06742e-05	1.99624e-05	9.52847e-05	8.5361e-05	6.22844e-06	9.63261e-05	2.15413e-05	2.24889e-05	5.61708e-05	6.20099e-05	3.11211e-05	2.97001e-05	1.94878e-05	1.6408e-05	1.79794e-06	1.28008e-05	8.4186e-06	-2.76884e-05	1.92523e-05	1.71202e-05	9.23035e-06
22.5	1.59602e-05	1.52384e-05	1.984e-05	2.01698e-05	8.01538e-06	6.84484e-06	3.21289e-05	3.14652e-05	1.54679e-05	1.58139e-05	5.86838e-05	6.14253e-05	1.0674e-05	9.64444e-06	1.65798e-05	1.56533e-05	4.42696e-05	4.57271e-05	2.82275e-05	3.2097e-05	2.44619e-05	2.42218e-05	1.71391e-05	1.70634e-05	9.51206e-06	9.24735e-06	3.01199e-05	3.08395e-05	1.96727e-05	1.88314e-05	0.000100728	9.01385e-05	6.77451e-06	0.000101025	2.21932e-05	2.35874e-05	5.05292e-05	5.7917e-05	3.42102e-05	3.24962e-05	1.94865e-05	1.64436e-05	1.3418e-06	1.27618e-05	8.25843e-06	-2.76342e-05	1.88878e-05	1.67936e-05	9.35973e-06
23	1.57274e-05	1.5017e-05	1.95508e-05	1.98374e-05	7.86789e-06	6.7172e-06	3.10622e-05	3.05419e-05	1.52679e-05	1.55648e-05	6.16416e-05	6.46369e-05	1.11764e-05	1.00956e-05	1.78251e-05	1.67133e-05	4.52083e-05	4.64915e-05	3.26716e-05	3.68857e-05	2.45168e-05	2.43806e-05	1.65519e-05	1.64922e-05	9.13928e-06	8.89782e-06	2.93633e-05	3.01012e-05	1.90323e-05	1.82642e-05	0.000106502	9.53433e-05	7.35403e-06	9.99855e-05	2.29155e-05	2.47655e-05	5.20495e-05	5.48754e-05	3.73888e-05	3.53093e-05	1.93539e-05	1.63765e-05	9.30175e-07	1.27221e-05	8.06329e-06	-2.75592e-05	1.84922e-05	1.64648e-05	9.3747e-06
23.5	1.54956e-05	1.47991e-05	1.93346e-05	1.95871e-05	7.72313e-06	6.58916e-06	3.00916e-05	2.96527e-05	1.50373e-05	1.53068e-05	6.45337e-05	6.77558e-05	1.16906e-05	1.05637e-05	1.88812e-05	1.77131e-05	4.62355e-05	4.73026e-05	3.79251e-05	4.25792e-05	2.45975e-05	2.45647e-05	1.59889e-05	1.59294e-05	8.79065e-06	8.56555e-06	2.86698e-05	2.93978e-05	1.84536e-05	1.77271e-05	0.000110084	9.93446e-05	7.95963e-06	9.55483e-05	2.36203e-05	2.58366e-05	5.33922e-05	5.38826e-05	4.10431e-05	3.85802e-05	1.92806e-05	1.63436e-05	8.98058e-07	1.27117e-05	7.8794e-06	-2.74652e-05	1.81286e-05	1.61565e-05	9.3811e-06
24	1.52692e-05	1.45881e-05	1.91498e-05	1.93812e-05	7.59394e-06	6.47456e-06	2.92362e-05	2.88685e-05	1.47759e-05	1.50268e-05	6.73779e-05	7.07841e-05	1.2213e-05	1.10579e-05	1.97422e-05	1.86398e-05	4.74123e-05	4.82267e-05	4.40588e-05	4.92048e-05	2.46772e-05	2.47591e-05	1.54407e-05	1.53743e-05	8.45121e-06	8.23431e-06	2.80083e-05	2.87103e-05	1.79866e-05	1.73091e-05	0.000111284	0.000101974	8.58354e-06	8.78593e-05	2.43587e-05	2.6838e-05	5.52568e-05	5.42717e-05	4.51688e-05	4.22984e-05	1.92318e-05	1.63084e-05	9.9339e-07	1.27383e-05	7.70791e-06	-2.73564e-05	1.77945e-05	1.58708e-05	9.3681e-06
24.5	1.50481e-05	1.4382e-05	1.89876e-05	1.92124e-05	7.48172e-06	6.37576e-06	2.85192e-05	2.82057e-05	1.44789e-05	1.47196e-05	7.01343e-05	7.36792e-05	1.27365e-05	1.15715e-05	2.0398e-05	1.94852e-05	4.87457e-05	4.92797e-05	5.11208e-05	5.6778e-05	2.47344e-05	2.49431e-05	1.49029e-05	1.48259e-05	8.11382e-06	7.89584e-06	2.73715e-05	2.80301e-05	1.76259e-05	1.70113e-05	0.000110089	0.000103142	9.22437e-06	7.68127e-05	2.51735e-05	2.78057e-05	5.78246e-05	5.61637e-05	4.97748e-05	4.64813e-05	1.92033e-05	1.62672e-05	1.2158e-06	1.27998e-05	7.5487e-06	-2.72301e-05	1.74859e-05	1.56045e-05	9.33305e-06
25	1.4831e-05	1.41799e-05	1.88454e-05	1.9075e-05	7.38739e-06	6.29567e-06	2.7953e-05	2.76634e-05	1.4143e-05	1.43824e-05	7.2756e-05	7.63802e-05	1.32508e-05	1.20953e-05	2.08085e-05	2.02848e-05	5.02484e-05	5.04705e-05	5.92486e-05	6.53241e-05	2.47448e-05	2.51074e-05	1.43658e-05	1.4281e-05	7.76579e-06	7.54157e-06	2.67581e-05	2.735e-05	1.73587e-05	1.68077e-05	0.000106852	0.000102905	9.89976e-06	6.2294e-05	2.61405e-05	2.8834e-05	6.1025e-05	5.96816e-05	5.49249e-05	5.12161e-05	1.91962e-05	1.61951e-05	1.55032e-06	1.2892e-05	7.40246e-06	-2.70819e-05	1.72005e-05	1.53573e-05	9.2749e-06
25.5	1.46178e-05	1.39933e-05	1.86787e-05	1.89461e-05	7.29182e-06	6.20761e-06	2.73605e-05	2.70801e-05	1.3891e-05	1.41133e-05	7.52727e-05	7.89767e-05	1.37447e-05	1.26039e-05	2.11351e-05	2.08129e-05	5.18287e-05	5.16968e-05	6.80786e-05	7.48852e-05	2.47848e-05	2.51824e-05	1.38924e-05	1.3789e-05	7.58883e-06	7.34778e-06	2.61884e-05	2.67342e-05	1.70156e-05	1.64843e-05	9.99616e-05	9.99832e-05	1.05635e-05	5.52436e-05	2.69674e-05	2.9914e-05	6.04165e-05	5.95575e-05	6.03211e-05	5.62341e-05	1.91853e-05	1.61966e-05	1.64913e-06	1.30012e-05	7.2579e-06	-2.69802e-05	1.69246e-05	1.51184e-05	9.2684e-06
26	1.44144e-05	1.38108e-05	1.84824e-05	1.87978e-05	7.2105e-06	6.13549e-06	2.68274e-05	2.65597e-05	1.36454e-05	1.38542e-05	7.76518e-05	8.14216e-05	1.41994e-05	1.30938e-05	2.13491e-05	2.12732e-05	5.34965e-05	5.30508e-05	7.83144e-05	8.56122e-05	2.47269e-05	2.51235e-05	1.34119e-05	1.33052e-05	7.34398e-06	7.08e-06	2.56303e-05	2.61342e-05	1.6706e-05	1.62194e-05	9.26607e-05	9.5931e-05	1.12901e-05	4.73215e-05	2.79775e-05	3.11678e-05	5.98732e-05	5.94346e-05	6.63183e-05	6.19052e-05	1.91787e-05	1.62133e-05	1.87714e-06	1.31239e-05	7.11737e-06	-2.68639e-05	1.66512e-05	1.48805e-05	9.25337e-06
26.5	1.42186e-05	1.3634e-05	1.82533e-05	1.86268e-05	7.13792e-06	6.07478e-06	2.6322e-05	2.60648e-05	1.34271e-05	1.36213e-05	7.98545e-05	8.36692e-05	1.46058e-05	1.35533e-05	2.14506e-05	2.16763e-05	5.52201e-05	5.44978e-05	8.97604e-05	9.73016e-05	2.45789e-05	2.49329e-05	1.29324e-05	1.28368e-05	7.06264e-06	6.77578e-06	2.50912e-05	2.55614e-05	1.63932e-05	1.59553e-05	8.50346e-05	9.0721e-05	1.20807e-05	4.07498e-05	2.91667e-05	3.26684e-05	5.8588e-05	5.8369e-05	7.27769e-05	6.81275e-05	1.91689e-05	1.62399e-05	2.13419e-06	1.32482e-05	6.97706e-06	-2.67376e-05	1.63756e-05	1.46407e-05	9.23987e-06
27	1.40322e-05	1.34637e-05	1.79894e-05	1.84281e-05	7.07093e-06	6.0233e-06	2.58369e-05	2.55892e-05	1.32403e-05	1.34174e-05	8.18439e-05	8.56765e-05	1.49583e-05	1.39763e-05	2.14689e-05	2.20367e-05	5.6965e-05	5.60203e-05	0.000102135	0.00010966	2.43313e-05	2.46065e-05	1.24559e-05	1.23837e-05	6.7508e-06	6.44294e-06	2.45703e-05	2.50178e-05	1.60685e-05	1.56858e-05	7.73525e-05	8.45544e-05	1.29261e-05	3.59563e-05	3.05485e-05	3.44639e-05	5.65955e-05	5.62015e-05	7.95076e-05	7.47379e-05	1.91521e-05	1.62772e-05	2.39787e-06	1.33683e-05	6.83687e-06	-2.6595e-05	1.60973e-05	1.43984e-05	9.22824e-06
27.5	1.38559e-05	1.33e-05	1.76851e-05	1.8202e-05	7.00424e-06	5.97218e-06	2.53622e-05	2.51269e-05	1.3086e-05	1.32439e-05	8.35582e-05	8.73632e-05	1.52451e-05	1.43489e-05	2.14628e-05	2.23709e-05	5.86955e-05	5.7575e-05	0.000114951	0.000122151	2.39683e-05	2.41763e-05	1.19815e-05	1.19413e-05	6.42621e-06	6.08259e-06	2.40713e-05	2.45108e-05	1.57248e-05	1.54007e-05	6.9835e-05	7.77501e-05	1.37891e-05	3.29217e-05	3.21478e-05	3.67409e-05	5.39708e-05	5.29692e-05	8.61105e-05	8.13548e-05	1.91334e-05	1.63221e-05	2.71866e-06	1.34823e-05	6.70042e-06	-2.64374e-05	1.58186e-05	1.41582e-05	9.22388e-06
28	1.36739e-05	1.31416e-05	1.74037e-05	1.79756e-05	6.9401e-06	5.94149e-06	2.49156e-05	2.46869e-05	1.29227e-05	1.3072e-05	8.49484e-05	8.86257e-05	1.54807e-05	1.46963e-05	2.1182e-05	2.29208e-05	6.02756e-05	5.91808e-05	0.000127788	0.000134211	2.35901e-05	2.36704e-05	1.15183e-05	1.15121e-05	6.00778e-06	5.70667e-06	2.36194e-05	2.40234e-05	1.54408e-05	1.51925e-05	6.4346e-05	7.13318e-05	1.47829e-05	2.80199e-05	3.41484e-05	3.89269e-05	5.193e-05	5.11574e-05	9.28129e-05	8.829e-05	1.91129e-05	1.63353e-05	3.02629e-06	1.35566e-05	6.56961e-06	-2.61718e-05	1.55588e-05	1.39192e-05	9.17121e-06
28.5	1.35072e-05	1.29953e-05	1.71237e-05	1.77314e-05	6.85804e-06	5.89714e-06	2.44891e-05	2.42646e-05	1.27806e-05	1.29201e-05	8.59061e-05	8.93356e-05	1.56602e-05	1.49983e-05	2.09208e-05	2.3574e-05	6.1788e-05	6.07859e-05	0.000139411	0.000144863	2.30874e-05	2.30866e-05	1.10812e-05	1.10901e-05	5.67165e-06	5.42164e-06	2.32089e-05	2.35906e-05	1.51468e-05	1.49733e-05	5.90956e-05	6.529e-05	1.57049e-05	2.44909e-05	3.62576e-05	4.15047e-05	4.97167e-05	4.8874e-05	9.82834e-05	9.4301e-05	1.90811e-05	1.63439e-05	3.25207e-06	1.36126e-05	6.44783e-06	-2.58448e-05	1.53282e-05	1.36962e-05	9.11259e-06
29	1.33493e-05	1.28596e-05	1.68512e-05	1.74801e-05	6.75812e-06	5.83693e-06	2.40788e-05	2.38586e-05	1.26486e-05	1.2781e-05	8.63822e-05	8.94344e-05	1.57779e-05	1.52472e-05	2.06698e-05	2.43514e-05	6.31658e-05	6.23373e-05	0.00014927	0.000153493	2.2492e-05	2.24676e-05	1.06693e-05	1.06742e-05	5.409e-06	5.2161e-06	2.28432e-05	2.32083e-05	1.48572e-05	1.4758e-05	5.44478e-05	5.9925e-05	1.65478e-05	2.14551e-05	3.85784e-05	4.45147e-05	4.76093e-05	4.66963e-05	0.000102301	9.91355e-05	1.90418e-05	1.63375e-05	3.44346e-06	1.36433e-05	6.33815e-06	-2.54486e-05	1.51282e-05	1.34906e-05	9.04167e-06
29.5	1.32016e-05	1.27348e-05	1.65902e-05	1.72244e-05	6.64105e-06	5.76138e-06	2.36844e-05	2.34676e-05	1.25251e-05	1.26524e-05	8.63581e-05	8.89129e-05	1.58357e-05	1.54415e-05	2.04526e-05	2.52307e-05	6.43534e-05	6.37937e-05	0.000156897	0.000159685	2.18215e-05	2.18274e-05	1.02858e-05	1.0267e-05	5.22365e-06	5.09434e-06	2.2516e-05	2.28677e-05	1.45736e-05	1.45491e-05	5.04401e-05	5.53417e-05	1.73057e-05	1.88668e-05	4.11662e-05	4.79843e-05	4.568e-05	4.4699e-05	0.000104732	0.000102624	1.89939e-05	1.63154e-05	3.57937e-06	1.36471e-05	6.24226e-06	-2.49799e-05	1.49591e-05	1.33039e-05	8.95788e-06
30	1.30698e-05	1.26228e-05	1.63462e-05	1.69673e-05	6.50717e-06	5.67258e-06	2.33103e-05	2.30935e-05	1.24122e-05	1.25358e-05	8.58807e-05	8.78464e-05	1.58394e-05	1.55781e-05	2.03251e-05	2.61917e-05	6.54516e-05	6.501e-05	0.000161964	0.00016327	2.10801e-05	2.11892e-05	9.94052e-06	9.86955e-06	5.12696e-06	5.06147e-06	2.22087e-05	2.25421e-05	1.43003e-05	1.43568e-05	4.70685e-05	5.16262e-05	1.79966e-05	1.66775e-05	4.41186e-05	5.20909e-05	4.39802e-05	4.29284e-05	0.000105648	0.000104748	1.89497e-05	1.6288e-05	3.62102e-06	1.36296e-05	6.16663e-06	-2.44193e-05	1.48265e-05	1.31445e-05	8.86642e-06
30.5	1.29e-05	1.24996e-05	1.60688e-05	1.67074e-05	6.37497e-06	5.54514e-06	2.29157e-05	2.27162e-05	1.22758e-05	1.24062e-05	8.47496e-05	8.61142e-05	1.57627e-05	1.56212e-05	2.02324e-05	2.69533e-05	6.59993e-05	6.63e-05	0.00016353	0.000162806	2.04128e-05	2.05322e-05	9.58805e-06	9.49741e-06	5.08495e-06	5.01078e-06	2.19284e-05	2.22674e-05	1.40218e-05	1.4126e-05	4.31194e-05	4.79428e-05	1.84451e-05	1.46866e-05	4.73715e-05	5.644e-05	4.20811e-05	4.10831e-05	0.000104286	0.000104539	1.88189e-05	1.61994e-05	3.80699e-06	1.35634e-05	6.06781e-06	-2.39382e-05	1.46678e-05	1.29485e-05	8.75204e-06
31	1.27604e-05	1.23899e-05	1.58078e-05	1.64514e-05	6.25187e-06	5.43177e-06	2.25428e-05	2.23527e-05	1.21523e-05	1.22841e-05	8.31847e-05	8.39894e-05	1.56456e-05	1.56084e-05	2.02842e-05	2.74958e-05	6.61806e-05	6.71192e-05	0.000161116	0.000158563	1.97791e-05	1.98885e-05	9.26587e-06	9.15481e-06	5.0594e-06	4.97161e-06	2.16062e-05	2.19316e-05	1.3754e-05	1.39138e-05	3.96888e-05	4.45971e-05	1.8886e-05	1.2938e-05	5.15343e-05	6.17023e-05	4.03123e-05	3.9363e-05	0.00010168	0.000102873	1.86922e-05	1.61097e-05	3.83726e-06	1.34884e-05	5.99736e-06	-2.33816e-05	1.45273e-05	1.27808e-05	8.63626e-06
31.5	1.26382e-05	1.22882e-05	1.5555e-05	1.61997e-05	6.14016e-06	5.32716e-06	2.21854e-05	2.20007e-05	1.2035e-05	1.21659e-05	8.12308e-05	8.15533e-05	1.54908e-05	1.55302e-05	2.04756e-05	2.77988e-05	6.61077e-05	6.74452e-05	0.000154926	0.000150768	1.91988e-05	1.92662e-05	8.97036e-06	8.84282e-06	5.04904e-06	4.92457e-06	2.12375e-05	2.1533e-05	1.3499e-05	1.37173e-05	3.65157e-05	4.14418e-05	1.93024e-05	1.13696e-05	5.65372e-05	6.779e-05	3.86162e-05	3.77323e-05	9.79338e-05	9.97733e-05	1.85587e-05	1.60149e-05	3.75178e-06	1.34027e-05	5.94747e-06	-2.27739e-05	1.43946e-05	1.26304e-05	8.5192e-06
32	1.2531e-05	1.21931e-05	1.53086e-05	1.59526e-05	6.04197e-06	5.23242e-06	2.18421e-05	2.16591e-05	1.19218e-05	1.20495e-05	7.89259e-05	7.88532e-05	1.5305e-05	1.53899e-05	2.07978e-05	2.78608e-05	6.57581e-05	6.73176e-05	0.000145244	0.000139739	1.86849e-05	1.86708e-05	8.69947e-06	8.56231e-06	5.04251e-06	4.86153e-06	2.08248e-05	2.10747e-05	1.32567e-05	1.3536e-05	3.35667e-05	3.84226e-05	1.96962e-05	9.94643e-06	6.22839e-05	7.45215e-05	3.70023e-05	3.62022e-05	9.31968e-05	9.53707e-05	1.84154e-05	1.59136e-05	3.57094e-06	1.33071e-05	5.9157e-06	-2.2128e-05	1.42645e-05	1.24939e-05	8.40159e-06
32.5	1.24399e-05	1.2104e-05	1.50646e-05	1.57087e-05	5.95728e-06	5.14697e-06	2.15142e-05	2.13254e-05	1.18084e-05	1.19291e-05	7.62951e-05	7.59551e-05	1.50933e-05	1.51981e-05	2.12705e-05	2.76184e-05	6.48971e-05	6.7044e-05	0.000132363	0.000125804	1.82469e-05	1.80976e-05	8.45563e-06	8.31654e-06	5.02668e-06	4.7856e-06	2.03606e-05	2.05463e-05	1.30266e-05	1.33686e-05	3.0847e-05	3.54938e-05	2.00883e-05	8.64283e-06	6.82345e-05	8.10558e-05	3.5477e-05	3.47656e-05	8.76593e-05	8.98462e-05	1.8261e-05	1.58013e-05	3.26849e-06	1.3201e-05	5.89979e-06	-2.14721e-05	1.41348e-05	1.23704e-05	8.27934e-06
33	1.23443e-05	1.20181e-05	1.48559e-05	1.54685e-05	5.87196e-06	5.08135e-06	2.12021e-05	2.10175e-05	1.17104e-05	1.18336e-05	7.37773e-05	7.31704e-05	1.49068e-05	1.495e-05	2.15583e-05	2.77614e-05	6.56903e-05	6.56076e-05	0.000120086	0.000113428	1.76937e-05	1.75392e-05	8.21959e-06	8.06078e-06	5.01548e-06	4.69173e-06	1.98935e-05	2.00288e-05	1.28131e-05	1.32063e-05	2.85229e-05	3.28083e-05	2.05096e-05	7.51492e-06	7.52206e-05	8.93112e-05	3.41473e-05	3.35144e-05	8.25948e-05	8.47161e-05	1.81279e-05	1.57062e-05	2.98809e-06	1.31165e-05	5.90827e-06	-2.07069e-05	1.40312e-05	1.22701e-05	8.18041e-06
33.5	1.22515e-05	1.19331e-05	1.46387e-05	1.52279e-05	5.7925e-06	5.01384e-06	2.08989e-05	2.0716e-05	1.16073e-05	1.1732e-05	7.11094e-05	7.0251e-05	1.47224e-05	1.46632e-05	2.1894e-05	2.78453e-05	6.59298e-05	6.43814e-05	0.00010795	0.000101319	1.71892e-05	1.7026e-05	7.99553e-06	7.8227e-06	4.98145e-06	4.60287e-06	1.94791e-05	1.957e-05	1.2605e-05	1.30499e-05	2.63574e-05	3.03029e-05	2.08626e-05	6.50333e-06	8.15908e-05	9.61207e-05	3.29991e-05	3.24559e-05	7.72937e-05	7.93113e-05	1.79723e-05	1.55938e-05	2.85742e-06	1.3023e-05	5.92014e-06	-1.99834e-05	1.39117e-05	1.21669e-05	8.08512e-06
34	1.2159e-05	1.18485e-05	1.44187e-05	1.49861e-05	5.71508e-06	4.94601e-06	2.06053e-05	2.04236e-05	1.14985e-05	1.16258e-05	6.83918e-05	6.73132e-05	1.45556e-05	1.43565e-05	2.22237e-05	2.79523e-05	6.58977e-05	6.33935e-05	9.67808e-05	9.0436e-05	1.6696e-05	1.65431e-05	7.78145e-06	7.59558e-06	4.92417e-06	4.52211e-06	1.91099e-05	1.91671e-05	1.2403e-05	1.28946e-05	2.43961e-05	2.7982e-05	2.11754e-05	5.60927e-06	8.69325e-05	0.0001011	3.20363e-05	3.15802e-05	7.21084e-05	7.40293e-05	1.7802e-05	1.54665e-05	2.84361e-06	1.29269e-05	5.93331e-06	-1.93057e-05	1.37849e-05	1.20647e-05	7.99377e-06
34.5	1.20634e-05	1.17632e-05	1.41956e-05	1.47434e-05	5.63884e-06	4.87698e-06	2.032e-05	2.01398e-05	1.1383e-05	1.15144e-05	6.56706e-05	6.43861e-05	1.44136e-05	1.4046e-05	2.25232e-05	2.81384e-05	6.56621e-05	6.26439e-05	8.70055e-05	8.11782e-05	1.62105e-05	1.60904e-05	7.57586e-06	7.37772e-06	4.84386e-06	4.44891e-06	1.8791e-05	1.88273e-05	1.22067e-05	1.27388e-05	2.26218e-05	2.58428e-05	2.14482e-05	4.8226e-06	9.10684e-05	0.000104167	3.12548e-05	3.08833e-05	6.71676e-05	6.90383e-05	1.7617e-05	1.53242e-05	2.95479e-06	1.28287e-05	5.94138e-06	-1.86849e-05	1.3651e-05	1.19618e-05	7.90746e-06
35	1.19619e-05	1.16783e-05	1.39734e-05	1.45005e-05	5.56594e-06	4.80755e-06	2.0046e-05	1.98658e-05	1.12628e-05	1.1399e-05	6.29514e-05	6.14211e-05	1.42731e-05	1.37002e-05	2.27564e-05	2.85594e-05	6.52884e-05	6.2171e-05	7.88751e-05	7.37848e-05	1.57371e-05	1.56689e-05	7.379e-06	7.17055e-06	4.73962e-06	4.38709e-06	1.85298e-05	1.85572e-05	1.2014e-05	1.25782e-05	2.10154e-05	2.38898e-05	2.16862e-05	4.13002e-06	9.45631e-05	0.000106061	3.06524e-05	3.03869e-05	6.25896e-05	6.45126e-05	1.74069e-05	1.51615e-05	3.18902e-06	1.27237e-05	5.9386e-06	-1.81118e-05	1.35019e-05	1.18495e-05	7.82213e-06
35.5	1.19081e-05	1.1603e-05	1.37537e-05	1.42662e-05	5.50078e-06	4.75034e-06	1.9782e-05	1.96063e-05	1.11339e-05	1.12755e-05	6.02614e-05	5.8733e-05	1.42808e-05	1.36492e-05	2.32559e-05	2.83933e-05	6.37468e-05	6.21088e-05	7.09798e-05	6.62044e-05	1.53258e-05	1.52611e-05	7.20173e-06	6.98745e-06	4.65485e-06	4.34638e-06	1.82408e-05	1.82683e-05	1.1838e-05	1.24389e-05	1.96291e-05	2.20789e-05	2.19299e-05	3.56125e-06	9.37728e-05	0.000101823	3.00381e-05	2.98232e-05	5.78634e-05	5.9706e-05	1.72262e-05	1.5005e-05	3.20386e-06	1.2637e-05	5.92136e-06	-1.76854e-05	1.33858e-05	1.1774e-05	7.7396e-06
36	1.18378e-05	1.15247e-05	1.35341e-05	1.40319e-05	5.43411e-06	4.69145e-06	1.95242e-05	1.93522e-05	1.10004e-05	1.11439e-05	5.76576e-05	5.60331e-05	1.42862e-05	1.36054e-05	2.36358e-05	2.85684e-05	6.24558e-05	6.16891e-05	6.39888e-05	5.9606e-05	1.49239e-05	1.48779e-05	7.03968e-06	6.81623e-06	4.57223e-06	4.30104e-06	1.79616e-05	1.79882e-05	1.16692e-05	1.23001e-05	1.83937e-05	2.04481e-05	2.21607e-05	3.08012e-06	9.16573e-05	9.69563e-05	2.95114e-05	2.93471e-05	5.35015e-05	5.5382e-05	1.70498e-05	1.48481e-05	3.222e-06	1.25524e-05	5.86588e-06	-1.73204e-05	1.32778e-05	1.17065e-05	7.67239e-06
36.5	1.17629e-05	1.14472e-05	1.33199e-05	1.38007e-05	5.37005e-06	4.63588e-06	1.92757e-05	1.91071e-05	1.08648e-05	1.10069e-05	5.5124e-05	5.33474e-05	1.43008e-05	1.36015e-05	2.39561e-05	2.90237e-05	6.12292e-05	6.0974e-05	5.76472e-05	5.36086e-05	1.45495e-05	1.4517e-05	6.89527e-06	6.66135e-06	4.50053e-06	4.25844e-06	1.76814e-05	1.77046e-05	1.15103e-05	1.21661e-05	1.73059e-05	1.89864e-05	2.23967e-05	2.68268e-06	8.83075e-05	9.12648e-05	2.90321e-05	2.89249e-05	4.94587e-05	5.14609e-05	1.6878e-05	1.46907e-05	3.17396e-06	1.24688e-05	5.7748e-06	-1.70102e-05	1.31784e-05	1.16485e-05	7.61535e-06
37	1.16842e-05	1.13705e-05	1.31119e-05	1.35737e-05	5.30902e-06	4.58452e-06	1.90361e-05	1.88707e-05	1.07277e-05	1.08654e-05	5.26746e-05	5.07071e-05	1.43429e-05	1.36731e-05	2.42337e-05	2.97499e-05	6.00927e-05	5.99328e-05	5.18959e-05	4.81281e-05	1.42015e-05	1.41772e-05	6.76816e-06	6.52253e-06	4.44326e-06	4.21731e-06	1.73951e-05	1.74122e-05	1.13616e-05	1.20381e-05	1.63535e-05	1.76833e-05	2.26466e-05	2.36074e-06	8.37765e-05	8.49038e-05	2.8578e-05	2.85312e-05	4.57506e-05	4.79488e-05	1.67112e-05	1.45339e-05	3.04822e-06	1.2385e-05	5.64827e-06	-1.67515e-05	1.30894e-05	1.15999e-05	7.56762e-06
37.5	1.16004e-05	1.12938e-05	1.29123e-05	1.33537e-05	5.25316e-06	4.53894e-06	1.88054e-05	1.86436e-05	1.05917e-05	1.07238e-05	5.03642e-05	4.81263e-05	1.44574e-05	1.38943e-05	2.45468e-05	3.08746e-05	5.91594e-05	5.85586e-05	4.65941e-05	4.31607e-05	1.38816e-05	1.38584e-05	6.66231e-06	6.40246e-06	4.40391e-06	4.17433e-06	1.71e-05	1.71068e-05	1.12185e-05	1.19176e-05	1.55184e-05	1.65315e-05	2.29156e-05	2.10308e-06	7.85467e-05	7.84007e-05	2.81239e-05	2.8126e-05	4.2363e-05	4.48376e-05	1.65536e-05	1.43789e-05	2.80988e-06	1.23034e-05	5.48813e-06	-1.65439e-05	1.30152e-05	1.15614e-05	7.53207e-06
38	1.15053e-05	1.12172e-05	1.27045e-05	1.31245e-05	5.19361e-06	4.49016e-06	1.85871e-05	1.84224e-05	1.04615e-05	1.05772e-05	4.78624e-05	4.54922e-05	1.44255e-05	1.39185e-05	2.46588e-05	3.21264e-05	5.79818e-05	5.6832e-05	4.1834e-05	3.84514e-05	1.35963e-05	1.35619e-05	6.55553e-06	6.28055e-06	4.35979e-06	4.15285e-06	1.68392e-05	1.6826e-05	1.10962e-05	1.18111e-05	1.47705e-05	1.55183e-05	2.3211e-05	1.90979e-06	7.47048e-05	7.301e-05	2.77753e-05	2.78786e-05	3.94282e-05	4.2208e-05	1.63669e-05	1.42077e-05	2.758e-06	1.21863e-05	5.33855e-06	-1.62191e-05	1.29005e-05	1.15123e-05	7.49239e-06
38.5	1.14128e-05	1.11393e-05	1.25001e-05	1.29019e-05	5.13891e-06	4.44646e-06	1.83734e-05	1.82081e-05	1.03281e-05	1.04314e-05	4.54516e-05	4.30764e-05	1.45989e-05	1.41889e-05	2.49387e-05	3.36592e-05	5.66614e-05	5.51097e-05	3.74126e-05	3.41303e-05	1.33295e-05	1.32851e-05	6.46294e-06	6.17457e-06	4.32736e-06	4.13482e-06	1.65762e-05	1.65483e-05	1.0981e-05	1.17119e-05	1.411e-05	1.46166e-05	2.35495e-05	1.76035e-06	7.00613e-05	6.74774e-05	2.741e-05	2.75714e-05	3.67885e-05	3.98396e-05	1.61701e-05	1.40331e-05	2.71516e-06	1.2052e-05	5.17943e-06	-1.5933e-05	1.27966e-05	1.1464e-05	7.4497e-06
39	1.13203e-05	1.10594e-05	1.22975e-05	1.26843e-05	5.08833e-06	4.40687e-06	1.81654e-05	1.80004e-05	1.01952e-05	1.02884e-05	4.31204e-05	4.08445e-05	1.49395e-05	1.46514e-05	2.54001e-05	3.54371e-05	5.52061e-05	5.3389e-05	3.32822e-05	3.02229e-05	1.30842e-05	1.30274e-05	6.38303e-06	6.0813e-06	4.30238e-06	4.1221e-06	1.63191e-05	1.62795e-05	1.08718e-05	1.16223e-05	1.3517e-05	1.38169e-05	2.39312e-05	1.64724e-06	6.54792e-05	6.23668e-05	2.70282e-05	2.72074e-05	3.44354e-05	3.77227e-05	1.59632e-05	1.38538e-05	2.71063e-06	1.18992e-05	5.02371e-06	-1.5652e-05	1.26956e-05	1.14152e-05	7.40492e-06
39.5	1.12295e-05	1.09776e-05	1.20967e-05	1.24717e-05	5.04204e-06	4.37155e-06	1.79628e-05	1.77987e-05	1.00632e-05	1.01491e-05	4.08675e-05	3.88061e-05	1.54315e-05	1.53061e-05	2.6049e-05	3.727e-05	5.36039e-05	5.17112e-05	2.94571e-05	2.67119e-05	1.28571e-05	1.27868e-05	6.31316e-06	5.99851e-06	4.28342e-06	4.1139e-06	1.60679e-05	1.602e-05	1.0768e-05	1.15418e-05	1.29816e-05	1.31053e-05	2.43602e-05	1.56262e-06	6.10895e-05	5.77255e-05	2.66116e-05	2.67735e-05	3.23532e-05	3.58262e-05	1.57471e-05	1.36691e-05	2.74874e-06	1.17274e-05	4.87618e-06	-1.53694e-05	1.25961e-05	1.13656e-05	7.35655e-06
40	1.11389e-05	1.08958e-05	1.18972e-05	1.22639e-05	5.00139e-06	4.34138e-06	1.77658e-05	1.76034e-05	9.93226e-06	1.00152e-05	3.86806e-05	3.69842e-05	1.60919e-05	1.62834e-05	2.68405e-05	3.90261e-05	5.18794e-05	5.01439e-05	2.59614e-05	2.35093e-05	1.26387e-05	1.25562e-05	6.24526e-06	5.91715e-06	4.2685e-06	4.10301e-06	1.58112e-05	1.5764e-05	1.06602e-05	1.14637e-05	1.24913e-05	1.24648e-05	2.48352e-05	1.49533e-06	5.69475e-05	5.35114e-05	2.6156e-05	2.62834e-05	3.05028e-05	3.40993e-05	0	0	0	0	0	0	0	0	0
40.5	1.10356e-05	1.08039e-05	1.17078e-05	1.20562e-05	4.95522e-06	4.30567e-06	1.75676e-05	1.74051e-05	9.79532e-06	9.87216e-06	3.68581e-05	3.51438e-05	1.67484e-05	1.68221e-05	2.80238e-05	4.00238e-05	5.02935e-05	4.85631e-05	2.27696e-05	2.14634e-05	1.24185e-05	1.23258e-05	6.19018e-06	5.84867e-06	4.23612e-06	4.08148e-06	1.55625e-05	1.55197e-05	1.05505e-05	1.13772e-05	1.20282e-05	1.18957e-05	2.53365e-05	1.44956e-06	5.27579e-05	5.0299e-05	2.55465e-05	2.55834e-05	2.8757e-05	3.24589e-05	0	0	0	0	0	0	0	0	0
41	1.09378e-05	1.07109e-05	1.15201e-05	1.18532e-05	4.91418e-06	4.27562e-06	1.73728e-05	1.72117e-05	9.66217e-06	9.73451e-06	3.50878e-05	3.34103e-05	1.72936e-05	1.74424e-05	2.92578e-05	3.99208e-05	4.87404e-05	4.7101e-05	2.02497e-05	1.98268e-05	1.22139e-05	1.21135e-05	6.14242e-06	5.78479e-06	4.20914e-06	4.06488e-06	1.5324e-05	1.52821e-05	1.04499e-05	1.12999e-05	1.16153e-05	1.1379e-05	2.58886e-05	1.40861e-06	4.9236e-05	4.76027e-05	2.48225e-05	2.47951e-05	2.72103e-05	3.09612e-05	0	0	0	0	0	0	0	0	0
41.5	1.08401e-05	1.06163e-05	1.1335e-05	1.16524e-05	4.8763e-06	4.24886e-06	1.71807e-05	1.70217e-05	9.53108e-06	9.59976e-06	3.34179e-05	3.17509e-05	1.77397e-05	1.80706e-05	3.05123e-05	3.88161e-05	4.72913e-05	4.57586e-05	1.8356e-05	1.86699e-05	1.20164e-05	1.19106e-05	6.09785e-06	5.72048e-06	4.18212e-06	4.04628e-06	1.50888e-05	1.50475e-05	1.03497e-05	1.12222e-05	1.1239e-05	1.09069e-05	2.64844e-05	1.36876e-06	4.62594e-05	4.54229e-05	2.39904e-05	2.3925e-05	2.58059e-05	2.95573e-05	0	0	0	0	0	0	0	0	0
42	1.07444e-05	1.05211e-05	1.11536e-05	1.14544e-05	4.84182e-06	4.22536e-06	1.69917e-05	1.6835e-05	9.403e-06	9.46809e-06	3.18506e-05	3.01556e-05	1.80766e-05	1.86681e-05	3.1747e-05	3.67389e-05	4.596e-05	4.4535e-05	1.70694e-05	1.79653e-05	1.18227e-05	1.17148e-05	6.05423e-06	5.65524e-06	4.15394e-06	4.02485e-06	1.4857e-05	1.48158e-05	1.02493e-05	1.11427e-05	1.0894e-05	1.04714e-05	2.71243e-05	1.32704e-06	4.38302e-05	4.37235e-05	2.30535e-05	2.29802e-05	2.45248e-05	2.82319e-05	0	0	0	0	0	0	0	0	0
42.5	1.06434e-05	1.0422e-05	1.09748e-05	1.12578e-05	4.80755e-06	4.20199e-06	1.68003e-05	1.66478e-05	9.27441e-06	9.3377e-06	3.0375e-05	2.86075e-05	1.82866e-05	1.92605e-05	3.27317e-05	3.2902e-05	4.47387e-05	4.34173e-05	1.64066e-05	1.76437e-05	1.16118e-05	1.15149e-05	6.00122e-06	5.58504e-06	4.11858e-06	3.99192e-06	1.46225e-05	1.45884e-05	1.01402e-05	1.10568e-05	1.05738e-05	1.00581e-05	2.78411e-05	1.27778e-06	4.19267e-05	4.24497e-05	2.20044e-05	2.19763e-05	2.33428e-05	2.6979e-05	0	0	0	0	0	0	0	0	0
43	1.05761e-05	1.0332e-05	1.07899e-05	1.10608e-05	4.78529e-06	4.19012e-06	1.66202e-05	1.64774e-05	9.15755e-06	9.21565e-06	2.88827e-05	2.72506e-05	1.8707e-05	1.96793e-05	3.39704e-05	3.31306e-05	4.36502e-05	4.2467e-05	1.58228e-05	1.72469e-05	1.15027e-05	1.13722e-05	6.00869e-06	5.55728e-06	4.1325e-06	4.01476e-06	1.44404e-05	1.43795e-05	1.00622e-05	1.09982e-05	1.03137e-05	9.74752e-06	2.84956e-05	1.25877e-06	4.01801e-05	4.09954e-05	2.11932e-05	2.11221e-05	2.23149e-05	2.58338e-05	0	0	0	0	0	0	0	0	0
43.5	1.05146e-05	1.02459e-05	1.06157e-05	1.08718e-05	4.76787e-06	4.18092e-06	1.64501e-05	1.63092e-05	9.05099e-06	9.10414e-06	2.75131e-05	2.59875e-05	1.91722e-05	2.00456e-05	3.45718e-05	3.35309e-05	4.26214e-05	4.15792e-05	1.54345e-05	1.70195e-05	1.13742e-05	1.12233e-05	5.99898e-06	5.52549e-06	4.13923e-06	4.02607e-06	1.42537e-05	1.41687e-05	9.97344e-06	1.09258e-05	1.00643e-05	9.45133e-06	2.92711e-05	1.23509e-06	3.86336e-05	3.97089e-05	2.03628e-05	2.02366e-05	2.13468e-05	2.47573e-05	0	0	0	0	0	0	0	0	0
44	1.04546e-05	1.01602e-05	1.04461e-05	1.0687e-05	4.75268e-06	4.17254e-06	1.62839e-05	1.61421e-05	8.95098e-06	9.00016e-06	2.62317e-05	2.48273e-05	1.97375e-05	2.03491e-05	3.45168e-05	3.45187e-05	4.16389e-05	4.07446e-05	1.5144e-05	1.68282e-05	1.12385e-05	1.10743e-05	5.98187e-06	5.49737e-06	4.1462e-06	4.03497e-06	1.40707e-05	1.39624e-05	9.87706e-06	1.0845e-05	9.82946e-06	9.17886e-06	3.01479e-05	1.21208e-06	3.71987e-05	3.84465e-05	1.95827e-05	1.93752e-05	2.04401e-05	2.3757e-05	0	0	0	0	0	0	0	0	0
44.5	1.03991e-05	1.0076e-05	1.02827e-05	1.05074e-05	4.74069e-06	4.16546e-06	1.61225e-05	1.59769e-05	8.85732e-06	8.90203e-06	2.50381e-05	2.37684e-05	2.04269e-05	2.05822e-05	3.39522e-05	3.62705e-05	4.0697e-05	3.99551e-05	1.48867e-05	1.66368e-05	1.10979e-05	1.0926e-05	5.95918e-06	5.4746e-06	4.15428e-06	4.04263e-06	1.38934e-05	1.37615e-05	9.77556e-06	1.07575e-05	9.60712e-06	8.92872e-06	3.10897e-05	1.19076e-06	3.58165e-05	3.71644e-05	1.88641e-05	1.85505e-05	1.95913e-05	2.28251e-05	0	0	0	0	0	0	0	0	0
45	1.03661e-05	9.99713e-06	1.01219e-05	1.0338e-05	4.7361e-06	4.16358e-06	1.59687e-05	1.58153e-05	8.76554e-06	8.80537e-06	2.393e-05	2.28108e-05	2.12393e-05	2.07401e-05	3.31196e-05	3.87712e-05	3.98009e-05	3.92178e-05	1.46207e-05	1.64144e-05	1.09582e-05	1.07843e-05	5.93879e-06	5.46763e-06	4.16774e-06	4.05299e-06	1.37342e-05	1.35727e-05	9.67679e-06	1.06697e-05	9.40334e-06	8.70488e-06	3.17005e-05	1.1778e-06	3.44069e-05	3.58351e-05	1.81949e-05	1.77993e-05	1.88065e-05	2.19639e-05	0	0	0	0	0	0	0	0	0
45.5	1.02193e-05	9.87923e-06	9.94304e-06	1.01463e-05	4.70053e-06	4.1362e-06	1.57758e-05	1.56292e-05	8.66348e-06	8.70163e-06	2.28914e-05	2.18508e-05	2.21059e-05	2.11022e-05	3.06224e-05	3.9734e-05	3.88076e-05	3.8355e-05	1.44657e-05	1.61945e-05	1.08112e-05	1.0644e-05	5.89628e-06	5.41805e-06	4.16007e-06	4.04102e-06	1.35503e-05	1.3375e-05	9.5707e-06	1.05591e-05	9.1927e-06	8.48028e-06	3.34382e-05	1.1487e-06	3.34269e-05	3.46917e-05	1.75583e-05	1.69522e-05	1.805e-05	2.11563e-05	0	0	0	0	0	0	0	0	0
46	1.01051e-05	9.77462e-06	9.78521e-06	9.97039e-06	4.67992e-06	4.11872e-06	1.55975e-05	1.54549e-05	8.55997e-06	8.58785e-06	2.19378e-05	2.09669e-05	2.31069e-05	2.14576e-05	2.94403e-05	4.11384e-05	3.78851e-05	3.75712e-05	1.43219e-05	1.59899e-05	1.0672e-05	1.05059e-05	5.85707e-06	5.37889e-06	4.15729e-06	4.03288e-06	1.33756e-05	1.31853e-05	9.47219e-06	1.04561e-05	8.99037e-06	8.27201e-06	3.4466e-05	1.12328e-06	3.23579e-05	3.35164e-05	1.69234e-05	1.6169e-05	1.7412e-05	2.03826e-05	0	0	0	0	0	0	0	0	0
46.5	1.00036e-05	9.67407e-06	9.63509e-06	9.80465e-06	4.66645e-06	4.10629e-06	1.54232e-05	1.52857e-05	8.4476e-06	8.46078e-06	2.10565e-05	2.01313e-05	2.42154e-05	2.18511e-05	2.91832e-05	4.25184e-05	3.70098e-05	3.6827e-05	1.41937e-05	1.57871e-05	1.05475e-05	1.0377e-05	5.8243e-06	5.34649e-06	4.15866e-06	4.02901e-06	1.32144e-05	1.30056e-05	9.38649e-06	1.0361e-05	8.79906e-06	8.08125e-06	3.4767e-05	1.1034e-06	3.12803e-05	3.23536e-05	1.62863e-05	1.54451e-05	1.68779e-05	1.96332e-05	0	0	0	0	0	0	0	0	0
47	9.91233e-06	9.57701e-06	9.49263e-06	9.64836e-06	4.65914e-06	4.09817e-06	1.5252e-05	1.51212e-05	8.32724e-06	8.32114e-06	2.02389e-05	1.9336e-05	2.54374e-05	2.22999e-05	2.98861e-05	4.38535e-05	3.61734e-05	3.61083e-05	1.4069e-05	1.55828e-05	1.04391e-05	1.0258e-05	5.79927e-06	5.32011e-06	4.16401e-06	4.02958e-06	1.30667e-05	1.28356e-05	9.31573e-06	1.02746e-05	8.61824e-06	7.90698e-06	3.4469e-05	1.08909e-06	3.0193e-05	3.12051e-05	1.56503e-05	1.47782e-05	1.64332e-05	1.88861e-05	0	0	0	0	0	0	0	0	0
47.5	9.8443e-06	9.48737e-06	9.36246e-06	9.50529e-06	4.66312e-06	4.09737e-06	1.50858e-05	1.49655e-05	8.20367e-06	8.16832e-06	1.94847e-05	1.86075e-05	2.68072e-05	2.28206e-05	3.16703e-05	4.51334e-05	3.53807e-05	3.53853e-05	1.39546e-05	1.53795e-05	1.03459e-05	1.01488e-05	5.77852e-06	5.30054e-06	4.1753e-06	4.02606e-06	1.29285e-05	1.26725e-05	9.26196e-06	1.0199e-05	8.44689e-06	7.74657e-06	3.41093e-05	1.07827e-06	2.90821e-05	3.00539e-05	1.50044e-05	1.41639e-05	1.60294e-05	1.81307e-05	0	0	0	0	0	0	0	0	0
48	9.7588e-06	9.39382e-06	9.2159e-06	9.35907e-06	4.65149e-06	4.09462e-06	1.49214e-05	1.48042e-05	8.05404e-06	8.02965e-06	1.87672e-05	1.78243e-05	2.82188e-05	2.32835e-05	3.29712e-05	4.64753e-05	3.46819e-05	3.47458e-05	1.37976e-05	1.51412e-05	1.02458e-05	1.0031e-05	5.74022e-06	5.2791e-06	4.18526e-06	4.04912e-06	1.28038e-05	1.25187e-05	9.19436e-06	1.01145e-05	8.28251e-06	7.58751e-06	3.0938e-05	1.07343e-06	2.80289e-05	2.891e-05	1.43993e-05	1.36678e-05	1.57173e-05	1.72494e-05	0	0	0	0	0	0	0	0	0
48.5	9.66966e-06	9.30006e-06	9.07927e-06	9.21781e-06	4.64066e-06	4.08976e-06	1.47576e-05	1.46428e-05	7.91753e-06	7.89986e-06	1.80592e-05	1.70714e-05	2.97494e-05	2.38905e-05	3.44706e-05	4.77335e-05	3.39788e-05	3.40267e-05	1.3632e-05	1.4914e-05	1.01444e-05	9.91799e-06	5.70932e-06	5.26016e-06	4.19324e-06	4.06914e-06	1.26847e-05	1.23707e-05	9.14142e-06	1.00332e-05	8.12698e-06	7.44106e-06	2.89243e-05	1.07236e-06	2.69814e-05	2.78137e-05	1.38398e-05	1.31792e-05	1.53195e-05	1.62227e-05	0	0	0	0	0	0	0	0	0
49	9.58065e-06	9.20715e-06	8.94998e-06	9.08102e-06	4.62941e-06	4.08402e-06	1.45949e-05	1.44819e-05	7.79153e-06	7.78307e-06	1.7365e-05	1.63537e-05	3.14191e-05	2.46188e-05	3.58718e-05	4.89228e-05	3.32856e-05	3.32199e-05	1.34561e-05	1.46893e-05	1.00373e-05	9.80574e-06	5.67505e-06	5.24118e-06	4.20029e-06	4.08516e-06	1.25676e-05	1.22261e-05	9.0949e-06	9.95141e-06	7.97741e-06	7.30138e-06	2.77991e-05	1.07226e-06	2.59575e-05	2.6743e-05	1.33266e-05	1.27112e-05	1.48085e-05	1.50547e-05	0	0	0	0	0	0	0	0	0
49.5	9.48836e-06	9.11372e-06	8.82573e-06	8.94716e-06	4.61542e-06	4.07616e-06	1.44321e-05	1.43204e-05	7.67666e-06	7.68118e-06	1.6681e-05	1.56643e-05	3.3243e-05	2.54797e-05	3.70336e-05	5.00255e-05	3.25804e-05	3.23151e-05	1.32661e-05	1.44625e-05	9.92447e-06	9.69363e-06	5.63717e-06	5.22057e-06	4.20585e-06	4.09785e-06	1.24526e-05	1.20849e-05	9.05431e-06	9.86809e-06	7.83397e-06	7.16713e-06	2.75779e-05	1.07222e-06	2.49703e-05	2.57011e-05	1.28641e-05	1.22626e-05	1.41769e-05	1.37551e-05	0	0	0	0	0	0	0	0	0
50	9.3794e-06	9.01855e-06	8.71141e-06	8.81526e-06	4.5963e-06	4.06231e-06	1.42686e-05	1.41581e-05	7.57421e-06	7.59396e-06	1.60072e-05	1.49965e-05	3.52534e-05	2.64475e-05	3.79047e-05	5.09859e-05	3.18209e-05	3.13485e-05	1.3066e-05	1.42393e-05	9.80304e-06	9.57961e-06	5.59011e-06	5.19859e-06	4.21031e-06	4.10347e-06	1.23354e-05	1.19454e-05	9.01991e-06	9.78385e-06	7.69736e-06	7.03461e-06	2.84378e-05	1.07022e-06	2.4036e-05	2.4693e-05	1.24412e-05	1.18214e-05	1.34402e-05	1.23351e-05	0	0	0	0	0	0	0	0	0
50.5	9.33606e-06	8.93541e-06	8.60499e-06	8.69648e-06	4.59329e-06	4.06162e-06	1.41132e-05	1.40019e-05	7.48166e-06	7.50636e-06	1.53694e-05	1.44557e-05	3.74777e-05	2.76837e-05	3.93125e-05	5.1918e-05	3.10979e-05	3.01444e-05	1.28647e-05	1.40154e-05	9.68054e-06	9.47194e-06	5.54736e-06	5.17721e-06	4.2251e-06	4.11184e-06	1.22276e-05	1.18147e-05	8.97712e-06	9.69718e-06	7.55317e-06	6.91741e-06	2.98979e-05	1.05915e-06	2.3029e-05	2.36179e-05	1.20639e-05	1.14269e-05	1.24308e-05	1.1064e-05	0	0	0	0	0	0	0	0	0
51	9.2944e-06	8.85099e-06	8.49219e-06	8.58072e-06	4.58559e-06	4.05994e-06	1.39564e-05	1.3845e-05	7.39558e-06	7.42908e-06	1.47792e-05	1.39161e-05	3.99956e-05	2.90193e-05	4.05095e-05	5.26612e-05	3.0203e-05	2.88677e-05	1.26639e-05	1.37687e-05	9.57879e-06	9.37243e-06	5.51416e-06	5.15683e-06	4.24227e-06	4.1283e-06	1.21372e-05	1.16949e-05	8.95004e-06	9.61681e-06	7.42732e-06	6.806e-06	3.12588e-05	1.05182e-06	2.21029e-05	2.26108e-05	1.17221e-05	1.10795e-05	1.14191e-05	9.86367e-06	0	0	0	0	0	0	0	0	0
51.5	9.25509e-06	8.76731e-06	8.37899e-06	8.46939e-06	4.57639e-06	4.05763e-06	1.37996e-05	1.36888e-05	7.31505e-06	7.3575e-06	1.42362e-05	1.33985e-05	4.28049e-05	3.0472e-05	4.16621e-05	5.32052e-05	2.9156e-05	2.75399e-05	1.24666e-05	1.35073e-05	9.49252e-06	9.27928e-06	5.48527e-06	5.13768e-06	4.26402e-06	4.15024e-06	1.20593e-05	1.15844e-05	8.93252e-06	9.54218e-06	7.31433e-06	6.7008e-06	3.25025e-05	1.04486e-06	2.12364e-05	2.16441e-05	1.1408e-05	1.07739e-05	1.03923e-05	8.78974e-06	0	0	0	0	0	0	0	0	0
52	9.21749e-06	8.68449e-06	8.26409e-06	8.36189e-06	4.56506e-06	4.05486e-06	1.36428e-05	1.35334e-05	7.23856e-06	7.2905e-06	1.37336e-05	1.2902e-05	4.58861e-05	3.20807e-05	4.27607e-05	5.35537e-05	2.79696e-05	2.61728e-05	1.22714e-05	1.32283e-05	9.42008e-06	9.1913e-06	5.46034e-06	5.11836e-06	4.28968e-06	4.17779e-06	1.19935e-05	1.14832e-05	8.92301e-06	9.47274e-06	7.21363e-06	6.60214e-06	3.34597e-05	1.03725e-06	2.04261e-05	2.07064e-05	1.11199e-05	1.05125e-05	9.36836e-06	7.86358e-06	0	0	0	0	0	0	0	0	0
52.5	9.17359e-06	8.60077e-06	8.14792e-06	8.25845e-06	4.54927e-06	4.04932e-06	1.34859e-05	1.33778e-05	7.16222e-06	7.22439e-06	1.32789e-05	1.24084e-05	4.92137e-05	3.39493e-05	4.37973e-05	5.37606e-05	2.66269e-05	2.4784e-05	1.20777e-05	1.29259e-05	9.34583e-06	9.09997e-06	5.43143e-06	5.09362e-06	4.31347e-06	4.20658e-06	1.19354e-05	1.13831e-05	8.91749e-06	9.40121e-06	7.11978e-06	6.50605e-06	3.39726e-05	1.02229e-06	1.9673e-05	1.98105e-05	1.08346e-05	1.02938e-05	8.36212e-06	7.08922e-06	0	0	0	0	0	0	0	0	0
53	9.08665e-06	8.52679e-06	8.05783e-06	8.16061e-06	4.54895e-06	4.04378e-06	1.3331e-05	1.32294e-05	7.10319e-06	7.17083e-06	1.27741e-05	1.19968e-05	5.26187e-05	3.58023e-05	4.47267e-05	5.36746e-05	2.53601e-05	2.35769e-05	1.19039e-05	1.26748e-05	9.28582e-06	9.01407e-06	5.39363e-06	5.06988e-06	4.3336e-06	4.22343e-06	1.18587e-05	1.12926e-05	8.90954e-06	9.35183e-06	7.02919e-06	6.42531e-06	3.46216e-05	1.03018e-06	1.89751e-05	1.88792e-05	1.06524e-05	1.00836e-05	7.49438e-06	6.36493e-06	0	0	0	0	0	0	0	0	0
53.5	9.00092e-06	8.4559e-06	7.96437e-06	8.06457e-06	4.54442e-06	4.04127e-06	1.31799e-05	1.30834e-05	7.04525e-06	7.12075e-06	1.22584e-05	1.1613e-05	5.60666e-05	3.82176e-05	4.55718e-05	5.35333e-05	2.41639e-05	2.24031e-05	1.1725e-05	1.24041e-05	9.21593e-06	8.92498e-06	5.35952e-06	5.04209e-06	4.35507e-06	4.23881e-06	1.17894e-05	1.12047e-05	8.90545e-06	9.30134e-06	6.94894e-06	6.35529e-06	3.4848e-05	1.02923e-06	1.82506e-05	1.79152e-05	1.04752e-05	9.88942e-06	6.69887e-06	5.74658e-06	0	0	0	0	0	0	0	0	0
54	8.90474e-06	8.38887e-06	7.87555e-06	7.97192e-06	4.53972e-06	4.04014e-06	1.30328e-05	1.29404e-05	6.98913e-06	7.07389e-06	1.17364e-05	1.12557e-05	5.9496e-05	4.11667e-05	4.63161e-05	5.33523e-05	2.30556e-05	2.13049e-05	1.15451e-05	1.21288e-05	9.12954e-06	8.82917e-06	5.32103e-06	5.00901e-06	4.37283e-06	4.24714e-06	1.17177e-05	1.11127e-05	8.89998e-06	9.24924e-06	6.87361e-06	6.29518e-06	3.47127e-05	1.02195e-06	1.75059e-05	1.69352e-05	1.03077e-05	9.7024e-06	5.99423e-06	5.20496e-06	0	0	0	0	0	0	0	0	0
54.5	8.80021e-06	8.32614e-06	7.7916e-06	7.88217e-06	4.53499e-06	4.0401e-06	1.28894e-05	1.28004e-05	6.93463e-06	7.02977e-06	1.12006e-05	1.09274e-05	6.28595e-05	4.46231e-05	4.69543e-05	5.31278e-05	2.20545e-05	2.02837e-05	1.1363e-05	1.18509e-05	9.02651e-06	8.72647e-06	5.27755e-06	4.97002e-06	4.38566e-06	4.24797e-06	1.16424e-05	1.1018e-05	8.89136e-06	9.19594e-06	6.80312e-06	6.24586e-06	3.42187e-05	1.009e-06	1.67395e-05	1.59321e-05	1.01522e-05	9.52418e-06	5.38382e-06	4.73191e-06	0	0	0	0	0	0	0	0	0
55	8.6853e-06	8.26273e-06	7.71597e-06	7.79352e-06	4.52915e-06	4.04086e-06	1.27499e-05	1.26644e-05	6.88176e-06	6.98819e-06	1.0658e-05	1.06362e-05	6.61527e-05	4.85367e-05	4.74904e-05	5.28563e-05	2.11655e-05	1.93376e-05	1.11769e-05	1.1572e-05	8.8896e-06	8.60903e-06	5.21901e-06	4.91631e-06	4.38632e-06	4.23579e-06	1.15565e-05	1.09198e-05	8.87293e-06	9.13512e-06	6.73185e-06	6.20157e-06	3.34064e-05	9.84827e-07	1.59612e-05	1.48574e-05	1.00077e-05	9.36613e-06	4.85829e-06	4.31023e-06	0	0	0	0	0	0	0	0	0
55.5	8.63366e-06	8.21521e-06	7.63405e-06	7.71791e-06	4.53002e-06	4.04464e-06	1.26115e-05	1.25278e-05	6.82655e-06	6.95511e-06	1.03749e-05	1.03003e-05	6.91827e-05	5.28101e-05	4.78924e-05	5.26556e-05	2.02141e-05	1.83198e-05	1.09971e-05	1.1298e-05	8.82096e-06	8.52909e-06	5.20159e-06	4.90629e-06	4.414e-06	4.25183e-06	1.15008e-05	1.07952e-05	8.88062e-06	9.08932e-06	6.70349e-06	6.17437e-06	3.2185e-05	9.74462e-07	1.51127e-05	1.41687e-05	9.83925e-06	9.1729e-06	4.39746e-06	3.9511e-06	0	0	0	0	0	0	0	0	0
56	8.58386e-06	8.16534e-06	7.55524e-06	7.6413e-06	4.52788e-06	4.04437e-06	1.24719e-05	1.23907e-05	6.7741e-06	6.92069e-06	1.00356e-05	9.98809e-06	7.21408e-05	5.71417e-05	4.81836e-05	5.22283e-05	1.93071e-05	1.73489e-05	1.08139e-05	1.10216e-05	8.74957e-06	8.44656e-06	5.17899e-06	4.8871e-06	4.43065e-06	4.26402e-06	1.1445e-05	1.06934e-05	8.88219e-06	9.05067e-06	6.68584e-06	6.16314e-06	3.08017e-05	9.64894e-07	1.43214e-05	1.34287e-05	9.68952e-06	9.01429e-06	3.99987e-06	3.63651e-06	0	0	0	0	0	0	0	0	0
56.5	8.54542e-06	8.11233e-06	7.4805e-06	7.56557e-06	4.52484e-06	4.04198e-06	1.23318e-05	1.22544e-05	6.72421e-06	6.88771e-06	9.71866e-06	9.69132e-06	7.49704e-05	6.14359e-05	4.83676e-05	5.16142e-05	1.84034e-05	1.6395e-05	1.06296e-05	1.07477e-05	8.68076e-06	8.36612e-06	5.15475e-06	4.86485e-06	4.44058e-06	4.27676e-06	1.13909e-05	1.06053e-05	8.88078e-06	9.01721e-06	6.68294e-06	6.16488e-06	2.93044e-05	9.56206e-07	1.35777e-05	1.27048e-05	9.54968e-06	8.87985e-06	3.6494e-06	3.35625e-06	0	0	0	0	0	0	0	0	0
57	8.52017e-06	8.05843e-06	7.40888e-06	7.49079e-06	4.52102e-06	4.03709e-06	1.21909e-05	1.21186e-05	6.67657e-06	6.85601e-06	9.4269e-06	9.40899e-06	7.75979e-05	6.55834e-05	4.84529e-05	5.08065e-05	1.74938e-05	1.54427e-05	1.0444e-05	1.04774e-05	8.61922e-06	8.28985e-06	5.13046e-06	4.84143e-06	4.44508e-06	4.29134e-06	1.13395e-05	1.05316e-05	8.87726e-06	8.99004e-06	6.69684e-06	6.18098e-06	2.77455e-05	9.50319e-07	1.28803e-05	1.20098e-05	9.42305e-06	8.77214e-06	3.34081e-06	3.10608e-06	0	0	0	0	0	0	0	0	0
57.5	8.51093e-06	8.01341e-06	7.33863e-06	7.41637e-06	4.51509e-06	4.02849e-06	1.20465e-05	1.19818e-05	6.63092e-06	6.82443e-06	9.13991e-06	9.14921e-06	7.98942e-05	6.94812e-05	4.8404e-05	4.98303e-05	1.65736e-05	1.44549e-05	1.02545e-05	1.02083e-05	8.5567e-06	8.20789e-06	5.09684e-06	4.81397e-06	4.43961e-06	4.30365e-06	1.12823e-05	1.04681e-05	8.86563e-06	8.96377e-06	6.72242e-06	6.20263e-06	2.61338e-05	9.41074e-07	1.22331e-05	1.13223e-05	9.30591e-06	8.69469e-06	3.06167e-06	2.87647e-06	0	0	0	0	0	0	0	0	0
58	8.42313e-06	7.94524e-06	7.27668e-06	7.34218e-06	4.51179e-06	4.03283e-06	1.19144e-05	1.18564e-05	6.59086e-06	6.79851e-06	8.84769e-06	8.89151e-06	8.2084e-05	7.29578e-05	4.84117e-05	4.87317e-05	1.56515e-05	1.36306e-05	1.00783e-05	9.94154e-06	8.44961e-06	8.12393e-06	5.06364e-06	4.78081e-06	4.44485e-06	4.31469e-06	1.12322e-05	1.04333e-05	8.86429e-06	8.93621e-06	6.75951e-06	6.26036e-06	2.49381e-05	9.23092e-07	1.16411e-05	1.05962e-05	9.15274e-06	8.53035e-06	2.80463e-06	2.67297e-06	0	0	0	0	0	0	0	0	0
58.5	8.35014e-06	7.89398e-06	7.211e-06	7.27199e-06	4.50682e-06	4.0327e-06	1.17826e-05	1.17309e-05	6.54905e-06	6.77284e-06	8.57095e-06	8.63949e-06	8.3555e-05	7.59432e-05	4.83728e-05	4.74689e-05	1.47174e-05	1.27315e-05	9.89764e-06	9.67073e-06	8.36816e-06	8.05136e-06	5.04007e-06	4.75406e-06	4.45085e-06	4.32934e-06	1.11907e-05	1.04034e-05	8.867e-06	8.91494e-06	6.82505e-06	6.34019e-06	2.38789e-05	9.15286e-07	1.10294e-05	9.95036e-06	9.04046e-06	8.4255e-06	2.58547e-06	2.49662e-06	0	0	0	0	0	0	0	0	0
59	8.27486e-06	7.82176e-06	7.14165e-06	7.20125e-06	4.5007e-06	4.0313e-06	1.16525e-05	1.16071e-05	6.50564e-06	6.74846e-06	8.30288e-06	8.41179e-06	8.42851e-05	7.83885e-05	4.82662e-05	4.60987e-05	1.37906e-05	1.18098e-05	9.71573e-06	9.39797e-06	8.28846e-06	7.98176e-06	5.017e-06	4.73006e-06	4.45401e-06	4.34083e-06	1.11472e-05	1.03735e-05	8.86986e-06	8.89407e-06	6.90745e-06	6.43824e-06	2.30347e-05	9.05904e-07	1.03984e-05	9.36339e-06	8.90679e-06	8.33984e-06	2.39034e-06	2.33772e-06	0	0	0	0	0	0	0	0	0
59.5	8.19122e-06	7.83261e-06	7.07309e-06	7.14294e-06	4.49533e-06	4.0314e-06	1.15252e-05	1.14861e-05	6.46408e-06	6.72505e-06	8.02308e-06	8.14945e-06	8.42968e-05	8.01781e-05	4.81182e-05	4.46424e-05	1.28321e-05	1.08092e-05	9.53272e-06	9.11666e-06	8.22459e-06	7.91527e-06	5.00415e-06	4.71391e-06	4.46933e-06	4.35907e-06	1.11195e-05	1.03541e-05	8.88149e-06	8.87351e-06	7.02444e-06	6.56122e-06	2.23861e-05	9.0413e-07	9.77258e-06	8.81771e-06	8.87088e-06	8.28351e-06	2.22238e-06	2.20389e-06	0	0	0	0	0	0	0	0	0
60	8.12042e-06	7.84676e-06	7.00417e-06	7.08634e-06	4.49156e-06	4.03261e-06	1.14026e-05	1.13686e-05	6.42407e-06	6.70471e-06	7.75982e-06	7.90891e-06	8.34803e-05	8.14083e-05	4.78791e-05	4.31505e-05	1.19071e-05	9.84514e-06	9.3523e-06	8.83869e-06	8.16173e-06	7.84939e-06	4.99182e-06	4.70219e-06	4.48453e-06	4.37416e-06	1.10945e-05	1.0338e-05	8.89441e-06	8.85346e-06	7.15577e-06	6.70589e-06	2.18949e-05	9.0208e-07	9.14997e-06	8.3272e-06	8.82651e-06	8.22588e-06	2.0717e-06	2.08384e-06	0	0	0	0	0	0	0	0	0
60.5	8.10166e-06	7.85991e-06	6.94917e-06	7.03698e-06	4.49751e-06	4.03935e-06	1.12887e-05	1.12581e-05	6.39485e-06	6.69224e-06	7.50717e-06	7.66727e-06	8.19783e-05	8.2222e-05	4.73382e-05	4.16645e-05	1.10857e-05	9.05596e-06	9.18471e-06	8.57019e-06	8.10559e-06	7.78363e-06	4.98514e-06	4.69275e-06	4.49138e-06	4.3841e-06	1.10833e-05	1.03297e-05	8.90315e-06	8.8352e-06	7.30557e-06	6.8736e-06	2.12807e-05	8.97289e-07	8.59717e-06	7.84186e-06	8.78414e-06	8.16807e-06	1.93991e-06	1.97499e-06	0	0	0	0	0	0	0	0	0
61	8.09195e-06	7.86694e-06	6.8918e-06	6.98379e-06	4.50127e-06	4.04392e-06	1.11772e-05	1.11496e-05	6.3644e-06	6.68009e-06	7.2814e-06	7.46393e-06	7.98533e-05	8.25174e-05	4.67522e-05	4.01976e-05	1.02993e-05	8.31824e-06	9.01543e-06	8.30987e-06	8.04275e-06	7.71549e-06	4.97074e-06	4.68319e-06	4.4968e-06	4.38937e-06	1.10671e-05	1.03263e-05	8.91049e-06	8.81567e-06	7.45601e-06	7.05676e-06	2.07629e-05	8.91955e-07	8.06091e-06	7.40166e-06	8.71684e-06	8.09418e-06	1.8184e-06	1.8748e-06	0	0	0	0	0	0	0	0	0
61.5	8.10067e-06	7.86801e-06	6.83897e-06	6.93081e-06	4.50731e-06	4.04959e-06	1.1071e-05	1.10451e-05	6.33687e-06	6.67082e-06	7.08138e-06	7.27653e-06	7.7212e-05	8.2293e-05	4.60458e-05	3.87763e-05	9.56955e-06	7.67729e-06	8.85048e-06	8.06021e-06	7.97968e-06	7.64867e-06	4.95629e-06	4.67467e-06	4.50119e-06	4.39155e-06	1.10544e-05	1.03297e-05	8.91679e-06	8.79623e-06	7.61395e-06	7.25884e-06	2.02626e-05	8.86569e-07	7.56476e-06	6.99364e-06	8.63848e-06	8.00682e-06	1.70798e-06	1.78305e-06	0	0	0	0	0	0	0	0	0
62	8.12496e-06	7.86311e-06	6.79141e-06	6.87787e-06	4.5155e-06	4.05632e-06	1.09702e-05	1.09448e-05	6.3121e-06	6.66407e-06	6.90983e-06	7.10037e-06	7.415e-05	8.15333e-05	4.52275e-05	3.74241e-05	8.89573e-06	7.13691e-06	8.68995e-06	7.82265e-06	7.91706e-06	7.58435e-06	4.94277e-06	4.66687e-06	4.50602e-06	4.39161e-06	1.10458e-05	1.03409e-05	8.92248e-06	8.7768e-06	7.7787e-06	7.47963e-06	1.97648e-05	8.81956e-07	7.1145e-06	6.61567e-06	8.55257e-06	7.90341e-06	1.60687e-06	1.69869e-06	0	0	0	0	0	0	0	0	0
62.5	8.16196e-06	7.85226e-06	6.74987e-06	6.82481e-06	4.5257e-06	4.06408e-06	1.08751e-05	1.08487e-05	6.28992e-06	6.6595e-06	6.76947e-06	6.93075e-06	7.07631e-05	8.02229e-05	4.43059e-05	3.61642e-05	8.27709e-06	6.70094e-06	8.53391e-06	7.59861e-06	7.85558e-06	7.52374e-06	4.93111e-06	4.65947e-06	4.5127e-06	4.39048e-06	1.10422e-05	1.03609e-05	8.92801e-06	8.75733e-06	7.94957e-06	7.71891e-06	1.92543e-05	8.78943e-07	6.71591e-06	6.26566e-06	8.46256e-06	7.78139e-06	1.51328e-06	1.62063e-06	0	0	0	0	0	0	0	0	0
63	8.14506e-06	7.82841e-06	6.68866e-06	6.76894e-06	4.52057e-06	4.05503e-06	1.07561e-05	1.07414e-05	6.2504e-06	6.63974e-06	6.65042e-06	6.72033e-06	6.76157e-05	7.79911e-05	4.32436e-05	3.4991e-05	7.63726e-06	6.16895e-06	8.36848e-06	7.34489e-06	7.80463e-06	7.46199e-06	4.92042e-06	4.65126e-06	4.5139e-06	4.3884e-06	1.10236e-05	1.03743e-05	8.91578e-06	8.72636e-06	8.13659e-06	7.94806e-06	1.88262e-05	8.68572e-07	6.31087e-06	5.94541e-06	8.37316e-06	7.69e-06	1.43458e-06	1.54839e-06	0	0	0	0	0	0	0	0	0
63.5	8.12049e-06	7.81772e-06	6.64112e-06	6.71695e-06	4.51813e-06	4.04919e-06	1.06473e-05	1.06405e-05	6.21444e-06	6.6226e-06	6.54251e-06	6.48067e-06	6.43865e-05	7.51597e-05	4.2172e-05	3.38995e-05	7.00089e-06	5.67699e-06	8.20263e-06	7.10876e-06	7.76854e-06	7.41531e-06	4.9213e-06	4.64355e-06	4.5301e-06	4.39528e-06	1.10218e-05	1.04016e-05	8.91494e-06	8.69699e-06	8.33975e-06	8.2016e-06	1.83961e-05	8.70575e-07	5.96205e-06	5.65054e-06	8.34238e-06	7.59877e-06	1.36481e-06	1.48577e-06	0	0	0	0	0	0	0	0	0
64	8.06341e-06	7.81662e-06	6.59459e-06	6.66672e-06	4.51072e-06	4.03835e-06	1.05349e-05	1.05387e-05	6.17323e-06	6.60007e-06	6.45208e-06	6.19556e-06	6.13591e-05	7.15633e-05	4.10583e-05	3.2924e-05	6.35109e-06	5.1604e-06	8.03257e-06	6.87235e-06	7.74781e-06	7.37914e-06	4.93181e-06	4.63571e-06	4.55616e-06	4.40927e-06	1.10258e-05	1.04363e-05	8.9149e-06	8.66385e-06	8.55971e-06	8.46536e-06	1.79833e-05	8.78752e-07	5.65137e-06	5.37914e-06	8.3608e-06	7.52011e-06	1.30447e-06	1.43072e-06	0	0	0	0	0	0	0	0	0
64	8.06341	7.81662	6.59459	6.66672	4.51072	4.03835	10.5349	10.5387	6.17323	6.60007	7.37914	4.93181	4.63571	4.55616	4.40927	11.0258	10.4363	8.9149	8.66385	0	0	0	0	0	0	0	0	0	0	0	0	0	0	0	0	0	0
[truncated: 57 more columns]
