# Supplementary material for: Levan Enhances Associated Growth of Bacteroides, Escherichia, Streptococcus and Faecalibacterium in Fecal Microbiota
Source: PLoS One. 2015 Dec 2;10(12):e0144042. doi: 10.1371/journal.pone.0144042 (PMC4667893; doi:10.1371/journal.pone.0144042)
Supplement: S3 Table — Empty cells show the not analysed compounds in the samples. (XLSX) [file pone.0144042.s003.xlsx]

## Sheet: Sheet1
	His	Asn	Ser	Gln	Arg	Gly	Asp	Glu	Thr	Ala	Pro	Orn	cys	Lys	Tyr	Met	Val	Ile	Leu	Phe	Trp	GABA	Putrescine	Cadaverine	Tyramine	Tryptamine	Acetate	Butyrate	Ethanol	Formate	Fructose	Glucose	Glycerol	Isobutyrate	Isovalerate	Lactate	Propionate	Succinate	Sucrose	Valerate
Sample	mmol/g	mmol/g	mmol/g	mmol/g	mmol/g	mmol/g	mmol/g	mmol/g	mmol/g	mmol/g	mmol/g	mmol/g	mmol/g	mmol/g	mmol/g	mmol/g	mmol/g	mmol/g	mmol/g	mmol/g	mmol/g	mmol/g	mmol/g	mmol/g	mmol/g	mmol/g	mmol/g	mmol/g	mmol/g	mmol/g	mmol/g	mmol/g	mmol/g	mmol/g	mmol/g	mmol/g	mmol/g	mmol/g	mmol/g	mmol/g
Exp2_FS1_Par1_Without levan	0.28	0	0.32	0.22	0.18	0.46	0.62	1.96	0.26	0.89	0.41	0.41	12.84	0.78	0.09	0.23	0.43	0.39	0.51	0.13	0.02	0.32	0	0	0	0	54.12	11.01	15.34	0	0	0	1.58	0	0	0	15.52	0.61	0	0
Exp2_FS1_Par2_Without levan	0.28	0	0.32	0.22	0.18	0.46	0.62	1.96	0.26	0.89	0.41	0.41	12.84	0.78	0.09	0.23	0.43	0.39	0.51	0.13	0.02	0.32	0	0	0	0	54.12	11.01	15.34	0	0	0	1.58	0	0	0	15.52	0.61	0	0
Exp2_FS2_Par1_Without levan	0.34	0	0.5	0.26	0.19	0.78	0.91	2.51	0.51	2.05	0.75	0.43	12.85	1.3	0.24	0.38	0.71	0.56	0.85	0.26	0.06	0.33	0	0	0	0	25.94	2.2	55.41	0	0	0	3.41	0	0	0	3.18	1.14	0	0
Exp2_FS2_Par2_Without levan	0.34	0	0.5	0.26	0.19	0.78	0.91	2.51	0.51	2.05	0.75	0.43	12.85	1.3	0.24	0.38	0.71	0.56	0.85	0.26	0.06	0.33	0	0	0	0	25.94	2.2	55.41	0	0	0	3.41	0	0	0	3.18	1.14	0	0
Exp2_FS3_Par1_Without levan	0.37	0.19	0.65	0.3	0.2	0.75	1.17	1.96	0.57	1.38	0.58	0.4	12.11	1.13	0.31	0.4	0.73	0.59	0.92	0.33	0.07	0.31	0	0	0	0	20.26	3.38	56.72	0	0	0	1.8	0	0	0	0.33	0.73	0	0
Exp2_FS3_Par2_Without levan	0.37	0.19	0.65	0.3	0.2	0.75	1.17	1.96	0.57	1.38	0.58	0.4	12.11	1.13	0.31	0.4	0.73	0.59	0.92	0.33	0.07	0.31	0	0	0	0	20.26	3.38	56.72	0	0	0	1.8	0	0	0	0.33	0.73	0	0
Exp2_FS4_Par1_Without levan	0.48	0.19	0.77	0.33	0.23	0.95	1.16	8.28	0.53	2.34	0.71	0.74	11.55	1.86	0.38	0.48	0.85	0.62	0.85	0.31	0.1	0.37	0.83	1.28	0	0	51.48	8.99	82.44	0	0	0.17	6.18	0	0	0	9.28	2.17	0	0
Exp2_FS4_Par2_Without levan	0.48	0.19	0.77	0.33	0.23	0.95	1.16	8.28	0.53	2.34	0.71	0.74	11.55	1.86	0.38	0.48	0.85	0.62	0.85	0.31	0.1	0.37	0.83	1.28	0	0	51.48	8.99	82.44	0	0	0.17	6.18	0	0	0	9.28	2.17	0	0
Exp2_FS5_Par1_Without levan	0.35	0	0.68	0.31	0.17	0.78	0.99	4.46	0.54	2.09	0.59	0.57	11.29	1.6	0.32	0.49	0.84	0.62	0.89	0.31	0.07	0.31	0	0	0	0	25.06	4.17	38.5	0	0	0	3.58	0	0	0	6.31	1.11	0	0
Exp2_FS5_Par2_Without levan	0.35	0	0.68	0.31	0.17	0.78	0.99	4.46	0.54	2.09	0.59	0.57	11.29	1.6	0.32	0.49	0.84	0.62	0.89	0.31	0.07	0.31	0	0	0	0	25.06	4.17	38.5	0	0	0	3.58	0	0	0	6.31	1.11	0	0
Exp5_FS1_Par1_Levan+AA																						0	0	0	0	0	46.39	8.74	0	0	4.51	1.17	36.3	2.24	0	0	13.76	0.78	0	0
Exp5_FS1_Par2_Levan+AA																						0	0	0	0	0	46.39	8.74	0	0	4.51	1.17	36.3	2.24	0	0	13.76	0.78	0	0
Exp5_FS2_Par1_Levan+AA																						0.05	0	0	0	0	26.23	2.63	0	0	5.55	2.29	38.55	8	0	0	6.62	1.56	0	0
Exp5_FS2_Par2_Levan+AA																						0.05	0	0	0	0	26.23	2.63	0	0	5.55	2.29	38.55	8	0	0	6.62	1.56	0	0
Exp5_FS3_Par1_Levan+AA																						0.02	0	0	0	0	21.29	3.07	0	0	3.95	1.98	36.93	5.97	0	0	4.82	0	0	0
Exp5_FS3_Par2_Levan+AA																						0.02	0	0	0	0	21.29	3.07	0	0	3.95	1.98	36.93	5.97	0	0	4.82	0	0	0
Exp5_FS4_Par1_Levan+AA																						0.06	0	0.52	0	0	42.57	7.67	0	0	8.58	3.34	37.82	11.46	0	0	9.84	1.87	0	0
Exp5_FS4_Par2_Levan+AA																						0.06	0	0.52	0	0	42.57	7.67	0	0	8.58	3.34	37.82	11.46	0	0	9.84	1.87	0	0
Exp5_FS5_Par1_Levan+AA																						0	0	0	0	0	25.93	3.73	0	0	3.35	1.72	39.41	3.34	0	0	7.48	1.14	0	0
Exp5_FS5_Par2_Levan+AA																						0	0	0	0	0	25.93	3.73	0	0	3.35	1.72	39.41	3.34	0	0	7.48	1.14	0	0
Exp5_FS6_Par1_Levan+AA																						0	0	0	0	0	28.43	1.21	0	0	4.91	1.23	26.59	0	0	0	4.53	0.6	0	0
Exp5_FS6_Par2_Levan+AA																						0	0	0	0	0	28.43	1.21	0	0	4.91	1.23	26.59	0	0	0	4.53	0.6	0	0
Exp5_FS7_Par1_Levan+AA																						0.05	0	0	0	0	48.62	9.53	0	0	5.5	1.86	39	0.91	0	0	17.39	4.93	0	0
Exp5_FS7_Par2_Levan+AA																						0.05	0	0	0	0	48.62	9.53	0	0	5.5	1.86	39	0.91	0	0	17.39	4.93	0	0
Exp5_FS8_Par1_Levan+AA																						0.01	0	0	0	0	32.78	2.7	0	0	7.6	1.54	37.19	2	0	0	5.72	0.59	0	0
Exp5_FS8_Par2_Levan+AA																						0.01	0	0	0	0	32.78	2.7	0	0	7.6	1.54	37.19	2	0	0	5.72	0.59	0	0
Exp5_FS9_Par1_Levan+AA																						0.01	0	0	0	0	25.71	1.48	0	0	4.44	1.37	39.39	0.81	0	0	6.92	3.2	0	0
Exp5_FS9_Par2_Levan+AA																						0.01	0	0	0	0	25.71	1.48	0	0	4.44	1.37	39.39	0.81	0	0	6.92	3.2	0	0
Exp5_FS10_Par1_Levan+AA																						0	0	0	0	0	30.84	5.04	0	0	6.95	2.06	53.39	0.26	0	0	6.38	0.67	0	0
Exp5_FS10_Par2_Levan+AA																						0	0	0	0	0	30.84	5.04	0	0	6.95	2.06	53.39	0.26	0	0	6.38	0.67	0	0
Exp5_FS11_Par1_Levan+AA																						0.04	0	0	0	0	24.63	1.2	0	0	6.97	1.86	32.12	0	0	0	4.16	0.85	0	0
Exp5_FS11_Par2_Levan+AA																						0.04	0	0	0	0	24.63	1.2	0	0	6.97	1.86	32.12	0	0	0	4.16	0.85	0	0
Exp5_FS11_Par3_Levan+AA																						0.04	0	0	0	0	24.63	1.2	0	0	6.97	1.86	32.12	0	0	0	4.16	0.85	0	0
Exp1_FS1_Par1_Without levan																											52.895	12.245	12.21	0	0	0	1.865	0	0	0	14.005	1.5	0	0
Exp1_FS1_Par2_Without levan																											52.895	12.245	12.21	0	0	0	1.865	0	0	0	14.005	1.5	0	0
Exp1_FS2_Par1_Without levan																											31.525	6.495	57.06	0	0.17	0.345	4.82	0	0	0	6.29	2.84	0	0
Exp1_FS2_Par2_Without levan																											31.525	6.495	57.06	0	0.17	0.345	4.82	0	0	0	6.29	2.84	0	0
Exp1_FS3_Par1_Without levan																											21.215	5.005	50.045	0	0	0	1.625	0	0	0	3.465	1.36	0	0
Exp1_FS3_Par2_Without levan																											21.215	5.005	50.045	0	0	0	1.625	0	0	0	3.465	1.36	0	0
Exp1_FS4_Par1_Without levan																											54.495	11.055	80.38	0	1.335	2.675	8.975	0	0	0	10.175	4.1	0	0
Exp1_FS4_Par2_Without levan																											54.495	11.055	80.38	0	1.335	2.675	8.975	0	0	0	10.175	4.1	0	0
Exp1_FS5_Par1_Without levan																											24.615	4.975	33.885	2.16	0	0	4.415	0	0	0	5.83	2.395	0	0
Exp1_FS5_Par2_Without levan																											24.615	4.975	33.885	2.16	0	0	4.415	0	0	0	5.83	2.395	0	0
Exp3_FS2_Par1_Without levan	0	3e-05	7e-05	0	2e-05	0.00021	0.00021	0.00065	4e-05	0.00774	0.00031	0.00024	1e-05	0.00024	9e-05	0	0.00074	0.00027	0.00045	0.00023	2e-05	0.07	0.13	0.34	1.61	0.15	18.45		50.03	0	0	0	0	0	0	0	0.84	0.38	0	0
Exp3_FS2_Par2_Without levan	0	2e-05	3e-05	0	0	0.00017	0.00017	0.00055	2e-05	0.00849	0.00033	0.00021	0	0.00018	0.00012	1e-05	0.00078	0.00026	0.00042	0.00022	1e-05	0.04	0.13	0.35	1.64	0.16	18.45		50.03	0	0	0	0	0	0	0	0.84	0.38	0	0
Exp3_FS3_Par1_Without levan	0	4e-05	1e-05	0	3e-05	0.00306	0.00013	0.00334	2e-05	0.00423	0.00172	0.00023	3e-05	0.0007	0.00018	0.00065	0.00295	0.00181	0.00259	0.00126	1e-05	0.02	0.58	0.9	0.95	0.04	14.55		32.77	0	0	0	0	0	0	0	0.25	0	0	0
Exp3_FS3_Par2_Without levan	2e-05	8e-05	0.0001	3e-05	7e-05	0.00482	0.00018	0.0041	8e-05	0.0057	0.00243	0.00028	7e-05	0.00081	0.00029	0.00097	0.00417	0.00255	0.00368	0.00185	3e-05	0.01	0.87	1.42	1.44	0.02	14.55		32.77	0	0	0	0	0	0	0	0.25	0	0	0
Exp3_FS4_Par1_Without levan	0	0	0	0	0	0.0005	8e-05	0.00338	3e-05	0.00956	0.00066	0.0005	7e-05	0.00109	0.0021	0.00189	0.00685	0.00457	0.00605	0.00258	0.00033	0.01	2.03	2	0.64	0	36.24		98.84	0	0	0	0	0	0	0	4.66	1.31	0	0
Exp3_FS4_Par2_Without levan	0	6e-05	8e-05	0	7e-05	0.00048	0.00027	0.00349	0.00019	0.01286	0.00064	0.00063	0.0001	0.00109	0.00238	0.00232	0.00886	0.00562	0.00761	0.0031	0.00032	0.13	2.93	2.91	0.91	0	36.24		98.84	0	0	0	0	0	0	0	4.66	1.31	0	0
Exp3_FS5_Par1_Without levan	0	7e-05	0.0002	0.00021	0	0.00105	0.00034	0.00643	0.00015	0.00853	0.00046	0.00073	0.00041	0.00278	0.00012	0.00055	0.00182	0.00091	0.00138	0.00113	0.00023	0.28	1.12	0.32	2.08	0.13	22.44		26.08	0	0	0	0	0	0	0	3.43	0.92	0	0
Exp3_FS5_Par2_Without levan	0	0.00011	0.00021	0.00033	2e-05	0.00152	0.00054	0.01017	0.00026	0.01197	0.00077	0.00101	0.00055	0.00386	0.00016	0.00079	0.00286	0.00146	0.00212	0.00154	0.0003	0.28	1.58	0.37	2.47	0.18	22.44		26.08	0	0	0	0	0	0	0	3.43	0.92	0	0
Exp3_FS6_Par1_Without levan	0	2e-05	3e-05	0	0	0.00015	0.00011	0.00043	2e-05	0.00033	8e-05	0.00012	0	0.00034	7e-05	0	0.00051	0.00029	0.00041	9e-05	0	0.02	0	0	0	0	18.07		10.2	0	0	0	0	0	0	0	0	0	0	0
Exp3_FS6_Par2_Without levan	0	7e-05	0.00011	0	5e-05	0.00024	0.00018	0.00058	9e-05	0.00046	0.00013	0.00012	0	0.00033	9e-05	0	0.0006	0.00037	0.00053	0.00015	1e-05	0.04	0	0	0	0	18.07		10.2	0	0	0	0	0	0	0	0	0	0	0
Exp3_FS7_Par1_Without levan	0	6e-05	0.0001	0	5e-05	0.0001	0.00023	0.0003	5e-05	0.00288	3e-05	6e-05	0	0.00013	8e-05	0	0.00211	0.00073	0.00166	0.0012	0	0.1	0	1.22	1.87	0	50.18		35.61	0	0	0	0	0	0	0	15.28	4.86	0	0
Exp3_FS7_Par2_Without levan	0	7e-05	0.00012	0	8e-05	0.00013	0.00014	0.0002	5e-05	0.00199	3e-05	6e-05	0	8e-05	0.0001	0	0.00173	0.00059	0.00138	0.0013	2e-05	0.05	0	0.88	1.89	0.04	50.18		35.61	0	0	0	0	0	0	0	15.28	4.86	0	0
Exp3_FS8_Par1_Without levan	0	3e-05	0.00011	0	0	0.00024	0.00018	0.00052	6e-05	0.00041	0.00013	0.00012	0	0.00033	0.00014	0	0.00046	0.00028	0.00045	0.00018	3e-05	0.02	0	0	0	0	22.52		13.52	0	0	0	0	0	0	0	1.26	0	0	0
Exp3_FS8_Par2_Without levan	0	6e-05	0.00012	0	2e-05	0.00028	0.00025	0.00076	0.00011	0.00054	0.00016	0.00013	0	0.00042	0.00015	1e-05	0.00061	0.00038	0.0006	0.0002	3e-05	0.05	0	0	0	0	22.52		13.52	0	0	0	0	0	0	0	1.26	0	0	0
Exp3_FS9_Par1_Without levan	1e-05	8e-05	9e-05	0	5e-05	0.00028	0.0002	0.00072	6e-05	0.00062	0.00103	6e-05	0	0.0003	9e-05	0	0.00042	0.00023	0.00042	0.00014	2e-05	0.06	0	0	0	0	20.9		14.25	0	0	0	0	0	0	0	2.68	2.54	0	0
Exp3_FS9_Par2_Without levan	0	9e-05	9e-05	0	7e-05	0.00023	0.00018	0.00062	7e-05	0.0006	0.00094	6e-05	0	0.00028	9e-05	0	0.00042	0.00024	0.00044	0.00013	2e-05	0.05	0	0	0	0	20.9		14.25	0	0	0	0	0	0	0	2.68	2.54	0	0
Exp3_FS10_Par1_Without levan	1e-05	7e-05	9e-05	0	5e-05	0.00024	0.00023	0.00048	8e-05	0.00125	0.00012	0.00013	0	0.00029	0.00013	0	0.00111	0.00051	0.00085	0.00021	2e-05	0.07	0.19	0	0.07	0	20.1		11.8	0	0	0	0	0	0	0	0.98	0	0	0
Exp3_FS10_Par2_Without levan	0	6e-05	7e-05	0	3e-05	0.00017	0.00017	0.00032	6e-05	0.00087	9e-05	8e-05	0	0.0002	0.0001	0	0.0008	0.00037	0.00063	0.00018	1e-05	0.06	0.14	0	0.07	0	20.1		11.8	0	0	0	0	0	0	0	0.98	0	0	0
Exp3_FS11_Par1_Without levan	0	5e-05	8e-05	0	1e-05	0.00022	0.00038	0.0006	9e-05	0.00127	0.00017	0.00018	0	0.00041	0.00022	1e-05	0.00166	0.00091	0.00136	0.00029	3e-05	0.07	0.12	0	0	0	25.08		8.74	0	0	0	0	0	0	0	1.37	0.54	0	0
Exp3_FS11_Par2_Without levan	4e-05	7e-05	0.00019	0	5e-05	0.00044	0.00041	0.00069	0.00012	0.00172	0.00026	0.00022	0	0.00048	0.00032	2e-05	0.00245	0.0013	0.00192	0.00044	5e-05	0.05	0.18	0	0	0	25.08		8.74	0	0	0	0	0	0	0	1.37	0.54	0	0
Exp3_FS11_Par3_Without levan	0	1e-05	5e-05	0	0	0.00025	0.00027	0.00047	6e-05	0.00124	0.00016	0.00016	0	0.00035	0.00026	2e-05	0.00195	0.00102	0.0015	0.00033	4e-05	0.02	0.16	0	0	0	25.08		8.74	0	0	0	0	0	0	0	1.37	0.54	0	0
