# Supplementary material for: Levan Enhances Associated Growth of Bacteroides, Escherichia, Streptococcus and Faecalibacterium in Fecal Microbiota
Source: PLoS One. 2015 Dec 2;10(12):e0144042. doi: 10.1371/journal.pone.0144042 (PMC4667893; doi:10.1371/journal.pone.0144042)
Supplement: S4 Table — (XLSX) [file pone.0144042.s004.xlsx]

## Sheet: Sheet1
		H2	O2	N2	CH4	CO2	H2S	His	Asn	Ser	Gln	Arg	Gly	Asp	Glu	Thr	Ala	Pro	Orn	cys	Lys	Tyr	Met	Val	Ile	Leu	Phe	Trp	GABA	Putrescine	Cadaverine	Tyramine	Tryptamine	Acetate	Butyrate	Ethanol	Formate	Fructose	Glucose	Glycerol	Isobutyrate	Isovalerate	Lactate	Propionate	Succinate	Valerate	Adlercreutzia_G	Akkermansia_G	Alistipes_G
Sample	ENA code	mmol/gDW	mmol/gDW	mmol/gDW	mmol/gDW	mmol/gDW	mmol/gDW	mmol/gDW	mmol/gDW	mmol/gDW	mmol/gDW	mmol/gDW	mmol/gDW	mmol/gDW	mmol/gDW	mmol/gDW	mmol/gDW	mmol/gDW	mmol/gDW	mmol/gDW	mmol/gDW	mmol/gDW	mmol/gDW	mmol/gDW	mmol/gDW	mmol/gDW	mmol/gDW	mmol/gDW	mmol/gDW	mmol/gDW	mmol/gDW	mmol/gDW	mmol/gDW	mmol/gDW	mmol/gDW	mmol/gDW	mmol/gDW	mmol/gDW	mmol/gDW	mmol/gDW	mmol/gDW	mmol/gDW	mmol/gDW	mmol/gDW	mmol/gDW	mmol/gDW	gDW/gDW-total	gDW/gDW-total	gDW/gDW-total
Exp2_FS1_Par1_Without levan	ERS953738	0.00535368	22.9352	139.047	0.576413	7.77169	0.00713824	-0.159696	0	-0.108365	-0.125475	-0.0627377	-0.18251	-0.176806	-0.975286	-0.0741445	-0.370723	-0.148289	-0.119772	-7.30609	-0.290875	-0.0171103	-0.079848	-0.0912548	-0.125475	-0.0969582	-0.039924	-0.00570343	-0.079848	0	0	0	0	118.152	18.8555	-8.74906	0	0	0	0.359316	5.29848	0	0	21.4221	-0.347909	3.6559		0.0862112	0.0023537
Exp2_FS2_Par1_Without levan	ERS953739	0.0128834	35.1563	207.261	0.577177	4.60057	0	-0.293675	0	-0.31095	-0.129563	-0.10365	-0.44915	-0.526888	-1.87434	-0.328225	0.146838	-0.475063	-0.17275	-11.0646	-0.820563	-0.129563	-0.233213	-0.0777376	-0.2073	-0.250488	0.0259125	-0.03455	-0.129563	0.362775	0	1.37336	0	109.791	6.72862	-3.85233	0	0	0	2.01254	3.82642	0	0	5.75258	3.55865	0			0.00135008
Exp2_FS3_Par1_Without levan	ERS953740	0.00702199	49.0451	283.214	0.379187	4.37664	0.010533	-0.441088	-0.226504	-0.619907	-0.357639	-0.119213	-0.572222	-1.03715	-1.66898	-0.536458	0.27419	-0.250347	-0.250347	-14.4009	-1.00139	0.214583	-0.083449	4.97118	2.9684	3.93402	1.89548	-0.0596064	-0.166898	1.34711	3.15914	1.1206	0	113.967	3.98171	-2.92071	0	0	0	0.798726	0	0	0	19.9562	5.59108	0	0.000607597	0.00151899
Exp2_FS4_Par1_Without levan	ERS953741	0	18.2452	105.534	0.170216	8.16205	0.00279043	-0.1498	-0.0396529	-0.220294	-0.0793058	-0.0440588	-0.246729	-0.27757	-2.996	-0.101335	0.634446	-0.171829	-0.0660881	-5.06235	-0.559546	2.1016	0.281976	5.67477	3.63485	5.00948	2.27343	0.00881175	-0.0396529	-0.105741	0.506676	0.383311	0	134.736	14.0591	-24.2764	0	0	0.0748999	2.22056	0	0	0	13.6626	2.53338	0	0.00463595	0.000355509	0.083557
Exp2_FS5_Par1_Without levan	ERS953742	0.0168482	29.1242	165.462	0.423311	6.02694	0.0105301	-0.244013	0	-0.397393	-0.139436	-0.0697181	-0.341619	-0.376478	-2.71204	-0.299788	-0.550773	-0.320703	-0.15338	-7.85026	-0.739012	-0.132464	-0.118521	-0.0557745	-0.111549	-0.0976054	0.313732	-0.0278873	0.0418309	1.0388	0.334647	2.10549	0	114.798	11.2665	-4.08548	0	0	0	1.74993	2.68415	0	0	2.53077	5.7378	0	0.00119638		0.0147936
Exp3_FS1_Par1_Without levan	ERS953766	0	32.0281	215.687	0.213877	14.2228	0.491918	0	0	0	0	0	0.0392381	0.0882857	0.186381	0	0.19619	0	0.0392381	0	0.0882857	0.019619	0	0.225619	0.0392381	0.156952	0	0	0	0	0.529714	0	0	172.834	38.0609	92.3959	0	0	0	0	4.12981	0	0	45.0159	0	0.990762	3.06212e-06	0.0590609	0.010599
Exp3_FS2_Par1_Without levan	ERS953767	0.572889	149.793	940.649	0.257215	48.3214	1.55498	0	-0.0834746	-1.00169	0	-0.0834746	-1.83644	-1.83644	-7.34576	-1.37733	23.039	-0.626059	1.00169	-54.9263	-3.08856	-0.417373	-0.751271	0.292161	-0.834746	-1.16864	0.0834746	0.0417373	0.166949	0.542585	1.41907	6.7197	0.626059	476.139	43.1564	33.9742	0	0	0	0	10.81	0	0	80.553	20.493	0	0.000316206		0.0382836
Exp3_FS3_Par1_Without levan	ERS953768	0	110.921	708.676	0.295743	15.4631	0.109847	0	0.12333	-0.369989	0	0.0924973	8.75642	-1.3258	6.41315	-0.462487	10.6372	4.84069	0.709146	-33.7615	0.431654	0.154162	1.66495	8.29393	4.99486	6.9373	3.73073	0.0308324	0.0616649	1.78828	2.77492	2.92908	0.12333	140.534	4.96402	91.8499	0	0	0	0	0	0	0	6.59814	16.8345	0		0.00461232
Exp3_FS4_Par1_Without levan	ERS953769	0.868876	197.118	1381.51	5.12971	59.3175	1.38686	-0.363107	0	-1.60805	0	-0.20749	0	-3.16422	-19.9709	-1.03745	39.1118	1.71179	2.59362	-51.8724	-0.829959	9.70014	8.81831	32.3165	22.0458	28.8411	12.605	1.55617	0.0518724	10.5301	10.3745	0.363107	0	641.61	81.1803	-89.6356	0	0	0	0	0	0	0.933704	70.2353	53.8436	0	0.00102066		0.0860062
Exp3_FS5_Par1_Without levan	ERS953770	0	94.5379	618.613	0.660222	17.0619	0.229965	0	0.173545	-0.446259	0.520635	0	1.28919	-0.322298	5.75178	-0.371882	16.338	0.446259	1.80983	-19.2883	4.1155	-0.223129	0.818141	2.90068	1.14044	1.80983	2.30567	0.545427	0.69418	2.77672	0.793349	5.15677	0.322298	125.994	2.62797	31.2381	0	0	0	0	0	0	2.87589	4.98322	19.7098	0	0.000880067
Exp3_FS6_Par1_Without levan	ERS953771	0	76.1544	490.129	0.279411	17.484	0.558822	0	0.0402787	0.060418	0	0	0.30209	-0.161115	-3.26257	0.0402787	0.181254	0.161115	0.241672	-22.697	0.261812	0.140975	0	1.02711	0.584041	0.825713	0.181254	0	0.0402787	0	0	0	0	123.313	18.79	-10.3113	0	0	0	0	0	0	0	18.9108	0	0			0.311981
Exp3_FS7_Par1_Without levan	ERS953772	0.00287654	17.9481	113.6	0.337993	8.56488	0.58969	-1.0426	-0.554718	-11.4018	-0.695068	0	-7.09103	-2.47284	-2.21219	-1.97159	-2.11862	-1.45697	-3.86966	-7.71927	-1.10275	-0.989135	-0.213867	-0.407684	-0.594818	-0.334167	-0.0401001	-0.274017	0.0401001	0	0.815368	1.24979	0	111.218	30.1285	-23.7994	0	0	0	0	4.39096	0	0	29.8545	-2.22555	0			0.00723681
Exp3_FS8_Par1_Without levan	ERS953773	0.00563964	33.804	226.443	0.126892	14.2091	1.12511	0	0.0269764	-0.0179843	-0.440615	-0.00899214	0.0539528	-0.134882	-1.70851	0	-0.350693	0.0359685	0.107906	-13.2094	-0.0359685	0.0989135	0	0.161858	0.0719371	0.12589	0.0899214	0.0269764	-0.0269764	0	0	0	0	116.358	21.9858	-12.1574	0	0	0	0	2.26602	0	0	19.1443	0	0	0.00284065		0.146897
Exp3_FS9_Par1_Without levan	ERS953774	0	24.0296	168.49	0.170143	10.5613	0.0580977	0.00669147	0.0535318	0.0602233	-0.448329	0.0334574	0.187361	-0.107064	-1.00372	0.0401488	0	0.662456	0.0401488	-8.0833	-0.0267659	0.0535318	0	0.187361	0.0936806	0.173978	0.0936806	0.0133829	0.0401488	0	0	0	0	106.234	27.6425	-9.53535	0	0	0	0	2.81711	0	0	28.6261	-1.23792	0	0.000432199		0.0492264
Exp3_FS10_Par1_Without levan	ERS953775	0.00283687	35.2481	227.352	0.28085	14.0765	0.331914	-0.0513932	-0.0102786	-0.236409	0	-0.0513932	-0.164458	-0.349473	-4.08062	-0.0925077	-0.441981	-0.174737	0.133622	-15.1096	-0.45226	0.0308359	-0.0925077	0.729783	0.215851	0.359752	0.0411145	0.0102786	0.0205573	0.195294	0	0.0719504	0	116.087	20.4031	-12.1288	0	0	0	0	1.51096	0	0	20.8862	0	0	0.00127108	0.00864108	0.0493181
Exp3_FS11_Par1_Without levan	ERS953776	0	32.0814	209.274	0.5664	10.4218	0.298647	-0.00818572	0.0409286	-0.163714	0	-0.00818572	-0.221014	-0.188271	-4.10923	-0.106414	-0.720343	-0.163714	0.147343	-8.93062	-0.351986	0.0327429	-0.1146	1.0314	0.507514	0.728529	0.0900429	0.00818572	0.0573	0.0982286	0	0	0	118.136	21.5284	-7.15432	0	0	0	0	1.16237	0	0	19.8094	-0.442029	0	0.00188345	0.0210469	0.00385452
Exp1_FS1_Par1_Levan+AA	ERS953750	26.0142	14.3605	111.619	0.0844207	19.832	0.826246	-0.718849	-1.0479	-3.412	-0.435359	-0.475858	-1.02259	-1.24027	-0.941591	-1.14408	1.80725	-0.815033	0.0911217	-5.51792	-1.52376	-0.0506231	-0.0506231	-0.0303739	-0.541668	-0.334113	-0.177181	-0.13162	0	0.450546	1.63513	0	0	64.2813	0	106.359	4.85476	0	0	0.951715	0	0	53.7972	11.8964	17.0246	0
Exp1_FS2_Par1_Levan+AA	ERS953751	3.93237	17.3958	122.033	0	9.80911	1.19778	-0.659987	-0.989981	-3.16794	-0.412492	-0.439992	0.335494	-1.05048	-0.632488	-1.05048	0.53349	-1.14398	0.203496	-5.0984	-1.36947	-0.137497	0.115498	0.0714986	-0.181497	0.0989981	-0.390493	-0.120998	0.406992	0.390493	1.35297	0.241995	0	53.184	0	35.6998	39.0713	-4.87291	0	1.08898	0	0	125.64	6.44588	8.88783	0
Exp1_FS3_Par1_Levan+AA	ERS953752	20.0123	15.496	117.04	0.0579913	18.0592	1.21782	-0.374616	-1.24352	-3.78778	-0.489082	-0.541112	-1.52968	-1.30595	-0.98857	-1.25392	1.52448	-0.046827	0.119669	-5.88459	-1.65455	-0.218526	-0.083248	-0.270556	-0.608751	-0.827277	-0.718014	-0.150887	0.098857	0.639969	1.17588	0.213323	0	42.4201	0	70.0896	4.5162	0	0	0.993773	0	0	87.7382	7.54435	8.00742	0		0.000176541
Exp1_FS4_Par1_Levan+AA	ERS953753	18.2412	14.4151	111.684	0.00842006	18.4908	1.25122	-0.300731	-1.05757	-3.62882	-0.466133	-0.405987	-0.421023	-1.17786	-0.952315	-1.23801	2.20536	-0.0801949	0.165402	-5.54849	-1.59889	-0.00501218	0.0801949	0.731779	-0.245597	-0.0601462	-0.0852071	-0.140341	0.491194	0.75684	1.65903	0	0	63.0483	0	99.8678	12.5355	0	0	1.00745	0	0	58.6025	9.38281	14.4401	0
Exp1_FS5_Par1_Levan+AA	ERS953754	1.93998	18.7109	124.034	1.12123	7.14843	0.489351	-0.761457	-1.50116	-4.62313	-0.603727	-0.658117	0.353534	-1.54467	-1.14762	-1.63169	1.9254	0.135975	0.456874	-7.69616	-1.76767	-0.010878	-0.15773	-0.543898	-0.875676	-1.45765	-0.348095	-0.125097	0.946383	0.946383	1.29992	0.190364	0	64.3214	0	11.4708	19.0582	-3.0132	0	2.64334	0	0	76.8038	13.8803	27.63	0
Exp2_FS1_Par1_Levan+AA	ERS953743	0.241157	17.286	102.926	0.504965	6.37241	0.619548	-0.609805	-1.1751	-3.46743	-0.538587	-0.525234	-1.19735	-1.11723	-0.988151	-1.25967	1.08608	0.173594	0.142436	-5.8844	-1.71369	-0.0578647	-0.0623159	0.271519	-0.418406	-0.31603	0.0311579	-0.0578647	1.0015	0.729986	1.79826	0	0	53.0085	9.4364	-7.83844	10.064	1.32199	0	1.91844	0	0	119.326	11.9869	28.0688	0
Exp2_FS2_Par1_Levan+AA	ERS953744	6.42389	29.2654	176.181	0.518056	13.1069	1.12559	-0.751419	-2.33016	-7.24095	-1.08538	-0.925992	-0.78178	-2.17836	-1.63187	-2.59581	-0.850091	-2.84629	0.80455	-12.2732	-3.18784	-0.166982	-0.0910811	-1.19164	-1.22201	-1.70777	-0.447816	-0.113851	0.728649	0.387095	1.6091	0.288424	0	117.586	0	16.3111	41.3508	-53.5405	0	2.81593	0	0	87.5062	25.8974	16.4401	0
Exp2_FS3_Par1_Levan+AA	ERS953745	4.53965	25.3988	149.688	0.933574	11.4143	0.941588	0.782289	-1.84847	-5.42555	-0.870612	-0.763362	1.40055	-1.58981	-0.801215	0.952626	7.29926	0.391144	0.763362	-9.83539	-2.46673	-0.10094	0.82645	3.58339	3.3058	7.4759	1.84216	0.334365	0.447923	3.15439	10.6934	1.54565	0	66.1476	0	28.3769	8.99632	-28.9131	0	2.227	0	0	137.512	17.6141	15.5764	0
Exp2_FS4_Par1_Levan+AA	ERS953746	5.5502	20.2993	122.988	0.0222693	13.8932	1.06036	0.0466926	-1.35927	-4.18159	-0.679637	-0.617381	-1.89883	-1.37484	-1.36446	-0.129702	0.658885	0.259404	0.243839	-7.64722	-2.23606	-0.00518807	0.0830091	0.124514	-0.586252	-0.648509	0.0622569	-0.0103761	0.856032	0.679637	1.7847	0	0	106.786	0	36.3321	11.3307	-6.1323	0	2.0441	0	0	96.135	13.5201	13.6394	0
Exp2_FS5_Par1_Levan+AA	ERS953747	2.73612	22.5758	137.841	0.0148098	12.7031	1.20515	-1.02174	-1.6773	-4.95512	-0.761872	-0.200803	0.100402	-1.4824	-1.41744	-1.80133	0.915428	-0.63194	0.726436	-8.48099	-1.44106	-0.124026	-0.124026	-0.673282	-0.874086	-1.23435	-0.377983	-0.0531539	0	0.791402	1.05717	0.313017	0	75.5848	0	42.6648	12.0482	-27.575	0	2.40374	0	0	96.4684	14.2098	24.8347	0	0.00030703
Exp5_FS1_Par1_Levan+AA	ERS953788	0	0	0	0	0	0	-0.449421	-0.51141	-3.02197	-0.635389	-0.356438	-1.06156	-1.13905	-1.54973	-1.03832	2.01465	-0.836853	0.178219	-9.77879	-1.22429	0.271202	-0.379683	0.410678	-0.596645	-1.15455	-0.325443	0.00774864	0.216962	0.51141	0.550154	0	0	200.341	78.703	0	0	3.30092	0.906591	25.6403	10.7629	0	1.28627	108.884	0.495913	4.3005		0.0103071	0.00123413
Exp5_FS2_Par1_Levan+AA	ERS953789	0	0	0	0	0	0	-0.473332	-0.756243	-2.99777	-0.451569	-0.36996	-1.60498	-1.2731	-2.10007	-1.20781	-0.903139	-1.36015	0.386282	-5.92481	-1.87701	-0.397163	-0.304673	-0.984748	-1.04459	-1.94773	-0.522297	-0.0979307	1.10988	0	0.505975	0.375401	0.0163218	102.484	13.0683	0	0	3.01953	1.2459	20.9735	7.37745	0	173.452	2.80735	12.6494	0
Exp5_FS3_Par1_Levan+AA	ERS953790	0	0	0	0	0	0	-0.607823	-0.844198	-2.80837	-0.590939	-0.298283	-1.2663	-1.24379	-0.968014	-0.97927	1.62086	-1.05243	0	-7.1194	-1.42388	-0.242003	-0.0281399	0.450239	-0.146328	-0.568427	-0.0450239	0.0956758	1.22127	0.568427	1.13685	0.478379	0	76.0116	52.6836	0	1.47453	1.48579	1.11434	20.7842	2.84213	0	98.7993	8.85282	21.8816	0
Exp5_FS4_Par1_Levan+AA	ERS953791	0	0	0	0	0	0	-0.366971	-0.22225	-2.44992	-0.377308	-0.0671918	-1.1526	-0.124046	-1.52474	0.160227	1.94339	-0.899337	0.987203	-5.00837	-1.42653	0.242924	0.392814	0.728773	0.113709	-0.077529	0.325622	-0.0361802	0.470343	0.677087	1.05439	0.351465	0	82.8113	84.9666	0	0	4.43466	1.72631	19.5476	10.0891	0	28.908	3.56117	3.62836	0
Exp5_FS5_Par1_Levan+AA	ERS953792	0	0	0	0	0	0	-0.377231	-0.417241	-2.22338	-0.474397	-0.194331	0.0400094	-0.903069	-2.26339	-0.828766	1.30316	-0.828766	0.0971656	-5.70419	-1.30888	-0.280066	-0.0800187	0.131459	-0.3658	-0.82305	-0.240056	0.045725	0.251487	0.960225	1.00023	0.542984	0.0800187	102.75	40.1294	0	0	1.91473	0.983087	22.5253	7.97901	0	96.4397	8.8535	14.0604	0
Exp5_FS6_Par1_Levan+AA	ERS953793	0	0	0	0	0	0	-0.382683	-0.278744	-1.90869	-0.349611	-0.170081	-0.680325	-0.992141	-1.76696	-0.63308	1.40317	-0.699223	0.368509	-6.0993	-0.793713	-0.0283469	-0.217326	-0.222051	-0.500795	-1.28506	-0.401581	-0.0425203	0.0708672	0.103939	0	0	0.0472448	65.6655	54.9221	0	0	2.31972	0.581111	12.5624	1.42207	0	21.0617	18.2176	-0.283469	3.38273
Exp5_FS7_Par1_Levan+AA	ERS953794	0	0	0	0	0	0	-0.393992	0.00505118	-2.31849	-0.46976	-0.0303071	-0.995082	-1.5103	-1.25774	-0.737472	5.51084	-0.848598	0.338429	-6.4453	-0.990031	-0.161638	-0.222252	2.7933	1.39413	1.9447	0.949622	-0.0202047	0.585937	0.954673	1.55071	1.20723	0.055563	104.433	42.3541	0	0	2.77815	0.939519	19.6996	4.60162	0	160.34	11.8198	15.7041	0
Exp5_FS8_Par1_Levan+AA	ERS953795	0	0	0	0	0	0	-0.371011	-0.336939	-1.66576	-0.43537	-0.170362	-0.670092	-0.738237	-1.37426	-0.564089	2.68415	-0.503515	0.352082	-4.75122	-0.624662	0.109789	-0.208221	0.552731	-0.121147	-0.548945	-0.185506	0.0189291	0.0681449	0	0	0	0.0416441	98.4467	46.9594	0	0	2.87723	0.583018	13.2996	5.1563	0	1.15468	13.682	0.283937	1.23418
Exp5_FS9_Par1_Levan+AA	ERS953796	0	0	0	0	0	0	-0.395517	-0.388054	-1.88057	-0.361935	-0.197758	-0.660439	-1.05969	-0.835809	-0.660439	3.90293	-0.470143	0.119401	-5.44396	-0.735065	0.26119	-0.212684	1.02611	-0.063432	-0.253728	0.026119	0.0708945	0.264922	0.436561	0	0	0	102.726	47.4322	0	0.436561	1.65669	0.511187	12.6528	3.98129	0	8.56705	45.0255	1.03357	0
Exp5_FS10_Par1_Levan+AA	ERS953797	0	0	0	0	0	0	-0.392145	-0.207384	-1.84761	-0.294109	-0.0339356	-0.731501	-0.739043	-1.94564	-0.569364	3.68013	-0.671171	0.218696	-4.4418	-0.897409	-0.0829538	-0.128201	0.780519	0.131972	-0.297879	-0.188531	-0.0527888	0.177219	0.610841	0.735272	0.501493	0.0565594	71.0763	67.1284	0	0	2.61681	0.776749	20.1314	7.28485	0	24.7353	13.348	2.28123	0
Exp5_FS11_Par1_Levan+AA	ERS953798	0	0	0	0	0	0	-0.641285	-0.455492	-3.3203	-0.425525	-0.0539398	-1.33052	-1.63018	-3.54804	-1.09678	8.64836	-1.21065	0.317646	-8.17488	-1.69611	-0.0179799	-0.0659265	3.26636	1.11476	0.497445	-0.239733	-0.0779131	0.347612	1.75005	1.81597	0.605325	0.0659265	141.604	77.7033	0	0	4.17734	1.11476	19.2505	12.9096	0	36.9788	20.3173	7.03615	0
Exp4_FS1_Par1_Levan	ERS953777	0.00312216	3.42501	46.3571	0.542475	21.1495	0.00078054	0.0676856	0	0.0275756	0.0150412	0.00752062	0.170467	0.285784	0.513909	0.0275756	1.55928	0.478813	0.0701925	0.00501375	0.140385	0.175481	0.0300825	0.56906	0.300825	0.52143	0.205564	0.0576581	0.0877406	0.205564	0.0877406	0	0	75.9081	24.1036	23.6122	0	0	0	0	0.0852337	0	0.44873	34.7453	0	0	1.49289e-05	0.0102065	0.00202039
Exp4_FS2_Par1_Levan	ERS953778	2.34739	6.16269	68.3114	0.0447035	10.2097	0	0.0468294	-0.0212861	-0.00851444	0	-0.0170289	0.140488	-0.149003	-0.800358	0.0681155	0.195832	-0.0468294	0.195832	-5.60676	-0.327806	-0.0170289	0.0425722	0.208604	0.038315	0.123459	0.131974	0.0723728	0.485323	0.0468294	0.259691	0.157517	0	42.5084	1.24737	16.5776	0.429979	0	0	0	0	0	180.442	-0.357607	6.10486	0	0.00177026
Exp4_FS3_Par1_Levan	ERS953779	0.0109329	5.19563	58.1905	0.458339	15.2278	0.00252297	0	0.0061999	0.0185997	0	0.0433993	0.0154998	-0.0123998	0.127098	0.0278996	1.88477	-0.0185997	0.0588991	-3.40375	-0.142598	0.145698	0.164297	0.65099	0.294495	0.418493	0.282096	0.111598	0.802888	0.306895	0.378194	0.114698	0	47.3239	31.139	13.8475	0	0	0	0	0	0	34.3754	9.46725	9.20376	0	0.000224995	0.00044999
Exp4_FS4_Par1_Levan	ERS953780	3.59417	6.54603	48.0269	0.120434	17.739	0	0.146054	0.0165344	0.0110229	0	0.00826719	-0.0330687	1.01962	0.45194	0.581459	2.8632	0.0165344	0	-2.24316	-0.124008	0.460207	0.473985	1.31724	0.677909	1.0582	0.56768	0.0385802	0.722001	0.507054	0.923169	-0.0440917	0	41.3552	47.3572	19.3618	0	0	0	0	0	0	10.2596	1.62037	1.16016	0	0.00313357
Exp4_FS5_Par1_Levan	ERS953781	4.51148	4.92975	60.026	0.141966	19.6342	0.00857514	0.0395837	0.0164932	-0.0725702	0	0.00659729	0.51129	-0.0527783	-1.10834	-0.0527783	1.84394	-0.0494797	0.056077	-2.70159	-0.217711	-0.0527783	0.188023	1.00609	0.507991	0.570666	0.286982	0.0593756	0.181425	0.43872	0.58386	0.43872	0.0395837	71.5377	17.6906	23.9976	0	0	0	0	0	0	35.6617	13.0791	12.1654	0	0.000837127
Exp4_FS6_Par1_Levan	ERS953782	0.012547	5.6495	57.7388	0.0761185	14.7887	0.000836467	0.112971	0.0205401	0.133511	0	0	0.243058	0.0102701	-0.475846	0.133511	1.876	0.150628	0.318372	-3.79993	0.116394	0.212248	0.112971	0.45873	0.304679	0.469	0.236212	0.0410803	0.095854	0.0616204	0	0	0.0205401	49.7037	14.5766	17.1168	0	0	0	0	0	0	79.2199	11.4922	0	0	0.00189604
Exp4_FS7_Par1_Levan	ERS953783	0.000807748	0.222938	52.6482	0.132471	17.7131	0.0428106	-0.415239	-0.236899	-4.56763	-0.276826	-0.0133089	-2.85078	-1.04608	-0.809184	-0.798536	0.984862	-0.582932	-1.48262	-3.06904	-0.428548	-0.377974	-0.0665447	0.745301	0.396606	0.657462	0.226252	-0.0984862	0.0905008	0.0479122	0.383298	0.481784	0.0159707	46.2938	41.0767	2.55532	0	0	0	0	0	0	41.7395	8.44053	6.5826	0	0.000780785
Exp4_FS8_Par1_Levan	ERS953784	0.224025	4.28203	51.5863	0.165251	21.9485	0.00340723	0.002501	0.00750301	-0.00750301	-0.117547	-0.002501	0.0275111	-0.012505	-0.4977	0.010004	1.65567	0.217587	0.120048	-3.67398	-0.002501	0.0600241	0.010004	0.39766	0.195078	0.267608	0.0600241	0.0400161	0.0500201	0	0	0	0.017507	57.6557	25.4602	21.4511	0	0	0	0	0	0	0.270109	5.56974	0	0	0.00258769
Exp4_FS9_Par1_Levan	ERS953785	0.0250121	3.47277	44.3402	0.0500242	21.7676	0.00390814	0.00706936	0.00235645	0.0447726	-0.157882	0.00706936	0.0636243	-0.0282774	-0.447726	0.0188516	2.13966	0.0306339	0.0424162	-2.8466	-0.0117823	0.183803	0.00706936	0.506638	0.263923	0.426518	0.254497	0.0400597	0.0706936	0.141387	0	0	0	62.889	33.2307	7.0458	0	0	0	0	0	0	0.313408	26.3145	0.193229	0	0.000927188	0.000463594
Exp4_FS10_Par1_Levan	ERS953786	2.02192	3.68952	49.6638	0.0532302	20.1751	0.0224565	0.0833894	0	-0.0286651	0	-0.0234533	-0.0495125	-0.0677539	-0.974614	0.033877	2.16813	-0.0234533	0.234533	-3.7395	-0.117266	0.0625421	0.148537	0.77917	0.375252	0.443006	0.096419	0.0130296	0.0781776	0.310104	0.179808	0.0781776	0	32.0554	35.2138	22.2624	0	0	0	0	0	0	43.6387	8.58911	0.620209	0	0.0035592
Exp4_FS11_Par1_Levan	ERS953787	0.386711	3.69391	42.4366	0.0119447	19.7805	0.0156775	-0.0022135	0	-0.0509106	0	-0.00442701	-0.0774726	-0.0641916	-1.15324	-0.0287755	1.71546	-0.0531241	0.128383	-2.41493	-0.139451	0.0022135	-0.0110675	0.314317	0.101821	0.0885401	0.00885401	0.0110675	0.0199215	0.301036	0.210283	0.0287755	0	51.6543	30.17	21.4975	0	0	0	0	0	0	3.30255	7.49713	0.239058	0	0.00195437
[truncated: 85 more columns]
